# Supplementary material
Source: publisher site journal article supplement (https://www.dovepress.com/article/540467)
Supplement: Supplementary file 1 [file 540467%20Revised%20%252509Supplementary%20Material.docx]

**Table S1：Instrumental Variables Associated with Cerebrospinal Fluid Metabolites on Postpartum Depression**

| Cerebrospinal fluid metabolites | SNP | p_value | chromosome | base_pair_location | effect_allele | other_allele | effect_allele_frequency | beta | standard_error | total_sample_size | effect_allele_frequency_min | effect_allele_frequency_max | effect_allele_frequency_se | F-statistics |
| --- | --- | --- | --- | --- | --- | --- | --- | --- | --- | --- | --- | --- | --- | --- |
| N-acetyl-isoputreanine | rs12030162 | 3.718e-06 | 1 | 167824160 | A | T | 0.0418 | -0.0968 | 0.0209 | 291 | 0.0323 | 0.0478 | 0.0076 | 21.45152355 |
| N-acetyl-isoputreanine | rs2052277 | 2.561e-06 | 2 | 51563012 | A | G | 0.0191 | -0.1678 | 0.0357 | 291 | 0.0074 | 0.0226 | 0.0064 | 22.09263313 |
| N-acetyl-isoputreanine | rs13034969 | 1.583e-06 | 2 | 130119329 | C | G | 0.031 | 0.1205 | 0.0251 | 291 | 0.0226 | 0.0368 | 0.007 | 23.04765004 |
| N-acetyl-isoputreanine | rs35225704 | 5.518e-06 | 2 | 213381353 | A | C | 0.0412 | 0.0987 | 0.0217 | 291 | 0.0404 | 0.0419 | 7e-04 | 20.68782518 |
| N-acetyl-isoputreanine | rs1986624 | 2.023e-06 | 2 | 227190805 | A | T | 0.965 | -0.1109 | 0.0233 | 291 | 0.9613 | 0.9706 | 0.0046 | 22.65433145 |
| N-acetyl-isoputreanine | rs57970893 | 9.331e-06 | 4 | 60328759 | A | C | 0.065 | -0.0747 | 0.0169 | 291 | 0.0516 | 0.0735 | 0.0107 | 19.53744617 |
| N-acetyl-isoputreanine | rs4957362 | 5.644e-06 | 5 | 40993004 | A | G | 0.3921 | 0.039 | 0.0086 | 291 | 0.371 | 0.4191 | 0.0239 | 20.56517036 |
| N-acetyl-isoputreanine | rs114523630 | 6.952e-06 | 5 | 51406519 | A | T | 0.0555 | 0.0854 | 0.019 | 291 | 0.0484 | 0.0625 | 0.0071 | 20.20265928 |
| N-acetyl-isoputreanine | rs3756528 | 5.581e-06 | 5 | 172758076 | T | C | 0.4761 | -0.0393 | 0.0087 | 291 | 0.4484 | 0.5037 | 0.0276 | 20.40546968 |
| N-acetyl-isoputreanine | rs78877920 | 8.686e-06 | 6 | 5248118 | T | C | 0.9836 | -0.1584 | 0.0356 | 291 | 0.9807 | 0.989 | 0.004 | 19.79750032 |
| N-acetyl-isoputreanine | rs73696815 | 7.884e-06 | 7 | 47028547 | T | C | 0.9334 | 0.076 | 0.017 | 291 | 0.9258 | 0.9448 | 0.0093 | 19.98615917 |
| N-acetyl-isoputreanine | rs34196162 | 2.67e-06 | 7 | 47898998 | T | C | 0.8213 | -0.0498 | 0.0106 | 291 | 0.8194 | 0.8235 | 0.002 | 22.07226771 |
| N-acetyl-isoputreanine | rs117748775 | 9.486e-06 | 7 | 123849348 | T | C | 0.9774 | -0.1354 | 0.0306 | 291 | 0.9742 | 0.9853 | 0.005 | 19.57917895 |
| N-acetyl-isoputreanine | rs4872177 | 3.15e-06 | 8 | 23538426 | A | G | 0.2601 | -0.0461 | 0.0099 | 291 | 0.1765 | 0.3065 | 0.0623 | 21.68360371 |
| N-acetyl-isoputreanine | rs76467997 | 6.352e-06 | 8 | 75008402 | A | T | 0.8694 | -0.0562 | 0.0125 | 291 | 0.8548 | 0.8971 | 0.0201 | 20.214016 |
| N-acetyl-isoputreanine | rs2105374 | 5.875e-06 | 10 | 30054560 | T | C | 0.6808 | 0.0404 | 0.0089 | 291 | 0.6691 | 0.6903 | 0.0105 | 20.60547911 |
| N-acetyl-isoputreanine | rs35243932 | 7.382e-06 | 11 | 100708123 | C | G | 0.3082 | -0.0386 | 0.0086 | 291 | 0.3 | 0.3162 | 0.0081 | 20.14548405 |
| N-acetyl-isoputreanine | rs2862246 | 4.45e-06 | 13 | 24657042 | A | G | 0.3987 | 0.0418 | 0.0091 | 291 | 0.3774 | 0.4228 | 0.0227 | 21.09938413 |
| N-acetyl-isoputreanine | rs78795463 | 3.019e-06 | 13 | 57245202 | C | G | 0.9879 | -0.1845 | 0.0395 | 291 | 0.9871 | 0.989 | 9e-04 | 21.81717673 |
| N-acetyl-isoputreanine | rs750145 | 8.824e-06 | 16 | 83259167 | T | C | 0.1886 | 0.0498 | 0.0112 | 291 | 0.1471 | 0.2129 | 0.0317 | 19.77072704 |
| N-acetyl-isoputreanine | rs2049746 | 2.135e-06 | 18 | 68752998 | A | G | 0.1392 | -0.0596 | 0.0126 | 291 | 0.1287 | 0.1484 | 0.0098 | 22.37440161 |
| N-acetyl-isoputreanine | rs75544106 | 1.128e-06 | 18 | 71823160 | T | C | 0.033 | 0.1151 | 0.0236 | 291 | 0.0294 | 0.0355 | 0.003 | 23.78628627 |
| Glucose | rs72743290 | 8.267e-06 | 1 | 205234393 | T | C | 0.1108 | 0.0365 | 0.0082 | 291 | 0.0968 | 0.1213 | 0.0121 | 19.81335515 |
| Glucose | rs116551591 | 5.437e-07 | 1 | 222131627 | C | G | 0.9879 | -0.1113 | 0.0222 | 291 | 0.9871 | 0.989 | 9e-04 | 25.13531775 |
| Glucose | rs148671651 | 4.357e-06 | 2 | 105896586 | T | G | 0.989 | -0.1202 | 0.0262 | 291 | 0.9871 | 0.9963 | 0.0037 | 21.04778276 |
| Glucose | rs186822399 | 5.404e-06 | 2 | 107523820 | T | G | 0.9913 | -0.1194 | 0.0263 | 291 | 0.9903 | 0.9926 | 0.0011 | 20.61090951 |
| Glucose | rs77221276 | 5.409e-08 | 2 | 168999630 | A | G | 0.9879 | -0.1198 | 0.022 | 291 | 0.9871 | 0.989 | 9e-04 | 29.65297521 |
| Glucose | rs115411818 | 1.528e-06 | 3 | 6490365 | T | C | 0.0135 | 0.1077 | 0.0224 | 291 | 0.0074 | 0.0161 | 0.004 | 23.11720743 |
| Glucose | rs72916513 | 1.909e-06 | 3 | 86205526 | A | T | 0.9702 | -0.0705 | 0.0148 | 291 | 0.9669 | 0.9742 | 0.0036 | 22.69106099 |
| Glucose | rs78717230 | 4.331e-06 | 3 | 158444231 | T | C | 0.019 | 0.0867 | 0.0189 | 291 | 0.011 | 0.0226 | 0.0053 | 21.04333585 |
| Glucose | rs62293004 | 7.665e-06 | 3 | 182350796 | A | G | 0.1498 | -0.0297 | 0.0066 | 291 | 0.129 | 0.1618 | 0.0158 | 20.25 |
| Glucose | rs881997 | 6.686e-06 | 4 | 78098806 | T | C | 0.2494 | 0.025 | 0.0056 | 291 | 0.2452 | 0.2537 | 0.0042 | 19.92984694 |
| Glucose | rs1501691 | 1.08e-06 | 5 | 34078031 | T | C | 0.9968 | -0.2788 | 0.0572 | 291 | 0.9963 | 0.9968 | 1e-04 | 23.75710304 |
| Glucose | rs147281586 | 5.684e-06 | 5 | 53894461 | T | C | 0.0137 | 0.0991 | 0.0218 | 291 | 0.0074 | 0.0161 | 0.0039 | 20.66494824 |
| Glucose | rs142337898 | 3.575e-07 | 5 | 89308091 | T | C | 0.9697 | -0.0734 | 0.0144 | 291 | 0.9645 | 0.9779 | 0.0065 | 25.98167438 |
| Glucose | rs2312262 | 4.628e-06 | 5 | 128569705 | T | C | 0.3377 | 0.0233 | 0.0051 | 291 | 0.2978 | 0.3806 | 0.0414 | 20.87235679 |
| Glucose | rs72829318 | 1.725e-06 | 5 | 166740059 | A | C | 0.0164 | 0.0975 | 0.0204 | 291 | 0.0074 | 0.0193 | 0.0051 | 22.84277682 |
| Glucose | rs467053 | 8.67e-06 | 5 | 178724727 | T | C | 0.5818 | 0.0224 | 0.005 | 291 | 0.5645 | 0.5993 | 0.0174 | 20.0704 |
| Glucose | rs6920581 | 1.473e-06 | 6 | 6678882 | T | C | 0.409 | 0.0236 | 0.0049 | 291 | 0.4081 | 0.4097 | 8e-04 | 23.19700125 |
| Glucose | rs17243220 | 9.527e-07 | 6 | 24662764 | T | C | 0.0362 | 0.0651 | 0.0133 | 291 | 0.0355 | 0.0368 | 6e-04 | 23.95844875 |
| Glucose | rs113644051 | 2.484e-07 | 6 | 37596518 | A | G | 0.9867 | -0.1021 | 0.0198 | 291 | 0.9853 | 0.9903 | 0.0023 | 26.59016937 |
| Glucose | rs149281462 | 6.527e-06 | 6 | 93538202 | A | G | 0.0359 | 0.064 | 0.0142 | 291 | 0.0226 | 0.0441 | 0.0105 | 20.31342988 |
| Glucose | rs148251390 | 4.969e-06 | 6 | 121967541 | T | C | 0.9892 | -0.1269 | 0.0278 | 291 | 0.9871 | 0.9963 | 0.0039 | 20.83692614 |
| Glucose | rs10282526 | 3.347e-06 | 7 | 943711 | T | C | 0.7384 | 0.0257 | 0.0055 | 291 | 0.7132 | 0.7581 | 0.0223 | 21.83438017 |
| Glucose | rs73118076 | 2.705e-06 | 7 | 39351356 | T | C | 0.8951 | -0.0391 | 0.0083 | 291 | 0.8935 | 0.8971 | 0.0018 | 22.19204529 |
| Glucose | rs76401846 | 4.616e-06 | 7 | 67066880 | A | G | 0.9801 | -0.1012 | 0.0221 | 291 | 0.9774 | 0.9963 | 0.0066 | 20.96894003 |
| Glucose | rs112910828 | 2.515e-06 | 8 | 22636936 | A | T | 0.0189 | 0.0839 | 0.0178 | 291 | 0.0184 | 0.0193 | 5e-04 | 22.21692337 |
| Glucose | rs17599587 | 2.968e-06 | 8 | 137949508 | T | C | 0.9468 | -0.0543 | 0.0116 | 291 | 0.9355 | 0.9706 | 0.0164 | 21.91208383 |
| Glucose | rs7855540 | 3.477e-06 | 9 | 28223982 | A | G | 0.2391 | -0.0274 | 0.0059 | 291 | 0.2355 | 0.2426 | 0.0035 | 21.5673657 |
| Glucose | rs17388160 | 2.526e-06 | 10 | 78745937 | T | C | 0.6858 | -0.0241 | 0.0051 | 291 | 0.6765 | 0.6935 | 0.0085 | 22.33025759 |
| Glucose | rs145189837 | 2.33e-07 | 11 | 56576116 | C | G | 0.9809 | -0.0961 | 0.0186 | 291 | 0.9779 | 0.9839 | 0.003 | 26.69444444 |
| Glucose | rs74942200 | 4.5e-06 | 11 | 130474335 | A | G | 0.0155 | 0.0903 | 0.0197 | 291 | 0.0147 | 0.0161 | 7e-04 | 21.01082223 |
| Glucose | rs17539289 | 7.962e-07 | 12 | 41126330 | A | C | 0.0485 | 0.0559 | 0.0113 | 291 | 0.0441 | 0.0516 | 0.0037 | 24.47184588 |
| Glucose | rs73180152 | 1.596e-06 | 12 | 86612108 | A | C | 0.0069 | 0.1396 | 0.0291 | 291 | 0.0065 | 0.0074 | 4e-04 | 23.01361581 |
| Glucose | rs12820617 | 4.967e-06 | 12 | 103821115 | A | G | 0.9423 | -0.0494 | 0.0108 | 291 | 0.9338 | 0.9548 | 0.0103 | 20.92215364 |
| Glucose | rs118043772 | 1.613e-07 | 12 | 111339477 | T | C | 0.0104 | 0.1258 | 0.024 | 291 | 0.0097 | 0.011 | 7e-04 | 27.47506944 |
| Glucose | rs4885016 | 5.523e-06 | 13 | 73170489 | T | C | 0.1767 | 0.0278 | 0.0061 | 291 | 0.1728 | 0.1806 | 0.0039 | 20.76968557 |
| Glucose | rs80287632 | 6.847e-06 | 13 | 73714116 | T | C | 0.8855 | -0.0328 | 0.0073 | 291 | 0.8787 | 0.8903 | 0.0057 | 20.18840308 |
| Glucose | rs168518 | 1.512e-06 | 13 | 106913481 | A | G | 0.8384 | -0.0318 | 0.0066 | 291 | 0.8382 | 0.8387 | 2e-04 | 23.21487603 |
| Glucose | rs2051534 | 8.272e-06 | 14 | 22098484 | T | C | 0.8251 | -0.0285 | 0.0064 | 291 | 0.8125 | 0.8387 | 0.0131 | 19.83032227 |
| Glucose | rs117767939 | 7.366e-06 | 14 | 42325174 | A | T | 0.9889 | -0.1167 | 0.026 | 291 | 0.9871 | 0.9963 | 0.0037 | 20.14628698 |
| Glucose | rs117083731 | 8.986e-06 | 14 | 58546369 | A | G | 0.9965 | -0.1818 | 0.0409 | 291 | 0.9963 | 0.9968 | 2e-04 | 19.75791632 |
| Glucose | rs185509930 | 2.606e-06 | 16 | 28057830 | A | G | 0.9907 | -0.1212 | 0.0258 | 291 | 0.989 | 0.9935 | 0.0022 | 22.06814494 |
| Glucose | rs2586445 | 2.208e-06 | 17 | 48309653 | C | G | 0.6662 | 0.0253 | 0.0053 | 291 | 0.6355 | 0.7169 | 0.0394 | 22.78711285 |
| Glucose | rs12966148 | 6.631e-06 | 18 | 11134636 | A | G | 0.7054 | -0.0246 | 0.0055 | 291 | 0.6903 | 0.7206 | 0.0151 | 20.00528926 |
| Glucose | rs76044941 | 5.276e-06 | 18 | 27965006 | T | C | 0.0121 | 0.1019 | 0.0224 | 291 | 0.011 | 0.0129 | 9e-04 | 20.6943758 |
| Glucose | rs11089873 | 8.282e-06 | 22 | 38614933 | T | C | 0.9382 | -0.0436 | 0.0098 | 291 | 0.9323 | 0.9448 | 0.0063 | 19.79341941 |
| Benzoate | rs59829944 | 2.312e-06 | 1 | 25207136 | A | C | 0.1058 | 0.1256 | 0.0266 | 285 | 0.1029 | 0.1097 | 0.0034 | 22.29543784 |
| Benzoate | rs6426029 | 5.727e-06 | 1 | 38131269 | T | C | 0.7788 | 0.0948 | 0.0209 | 285 | 0.7677 | 0.7904 | 0.0113 | 20.57425425 |
| Benzoate | rs12090448 | 1.476e-07 | 1 | 82203562 | A | G | 0.0773 | 0.1483 | 0.0282 | 285 | 0.0772 | 0.0774 | 1e-04 | 27.6556637 |
| Benzoate | rs114722875 | 1.716e-06 | 1 | 108190038 | A | G | 0.9946 | 0.5264 | 0.11 | 285 | 0.9935 | 0.9963 | 0.0013 | 22.90057521 |
| Benzoate | rs35247600 | 4.778e-07 | 1 | 201987380 | T | C | 0.6858 | -0.0876 | 0.0174 | 285 | 0.6806 | 0.6912 | 0.0053 | 25.34601665 |
| Benzoate | rs711254 | 2.915e-06 | 2 | 36680848 | A | G | 0.3259 | 0.0891 | 0.0191 | 285 | 0.2871 | 0.3676 | 0.0402 | 21.76149228 |
| Benzoate | rs76484490 | 2.288e-06 | 2 | 41894363 | T | G | 0.9931 | -0.4475 | 0.0947 | 285 | 0.9926 | 0.9935 | 5e-04 | 22.32986623 |
| Benzoate | rs56341809 | 6.622e-06 | 2 | 135123488 | A | G | 0.9365 | 0.1432 | 0.0318 | 285 | 0.9355 | 0.9375 | 0.001 | 20.27831178 |
| Benzoate | rs62173318 | 9.989e-06 | 2 | 154915666 | A | G | 0.0263 | 0.2226 | 0.0504 | 285 | 0.0226 | 0.0294 | 0.0034 | 19.50694444 |
| Benzoate | rs72648992 | 7.076e-08 | 2 | 179578159 | A | G | 0.9757 | -0.2793 | 0.0518 | 285 | 0.9743 | 0.9774 | 0.0016 | 29.07249817 |
| Benzoate | rs72945230 | 4.186e-07 | 2 | 204908493 | T | G | 0.0035 | -0.6708 | 0.1326 | 285 | 0.0032 | 0.0037 | 2e-04 | 25.5916955 |
| Benzoate | rs187099623 | 1.708e-08 | 2 | 240756895 | T | C | 0.0061 | 0.5935 | 0.1052 | 285 | 0.0032 | 0.0074 | 0.0019 | 31.82804526 |
| Benzoate | rs35835286 | 2.033e-06 | 3 | 190740 | T | G | 0.0986 | 0.1321 | 0.0278 | 285 | 0.071 | 0.114 | 0.0206 | 22.57958957 |
| Benzoate | rs73851446 | 1.356e-06 | 3 | 109969845 | T | C | 0.9917 | -0.4499 | 0.0931 | 285 | 0.9903 | 0.9963 | 0.0026 | 23.35245933 |
| Benzoate | rs79089076 | 1.993e-07 | 3 | 137210252 | A | G | 0.9662 | -0.2513 | 0.0483 | 285 | 0.9596 | 0.9871 | 0.0118 | 27.07015333 |
| Benzoate | rs76648121 | 7.956e-06 | 3 | 164041926 | A | G | 0.0361 | -0.2033 | 0.0455 | 285 | 0.0355 | 0.0368 | 6e-04 | 19.96420239 |
| Benzoate | rs73185704 | 2.073e-06 | 3 | 183852775 | A | C | 0.166 | 0.1056 | 0.0223 | 285 | 0.1544 | 0.1742 | 0.0098 | 22.42425949 |
| Benzoate | rs114511014 | 3.216e-06 | 4 | 44501568 | C | G | 0.9708 | -0.2209 | 0.0474 | 285 | 0.9706 | 0.971 | 2e-04 | 21.71874611 |
| Benzoate | rs2390235 | 6.033e-06 | 4 | 122565377 | A | C | 0.8948 | -0.1155 | 0.0255 | 285 | 0.8774 | 0.9118 | 0.0172 | 20.51557093 |
| Benzoate | rs2611246 | 6.344e-06 | 4 | 166598495 | T | C | 0.5762 | -0.0716 | 0.0159 | 285 | 0.5548 | 0.6029 | 0.0239 | 20.27831178 |
| Benzoate | rs17269205 | 1.229e-06 | 5 | 8058257 | C | G | 0.0069 | 0.453 | 0.0934 | 285 | 0.0065 | 0.0074 | 5e-04 | 23.52353856 |
| Benzoate | rs59841864 | 1.049e-06 | 5 | 26199664 | T | C | 0.657 | -0.0838 | 0.0172 | 285 | 0.6397 | 0.6774 | 0.0188 | 23.73729043 |
| Benzoate | rs111560867 | 5.333e-06 | 5 | 80366494 | T | C | 0.0142 | 0.3074 | 0.0676 | 285 | 0.011 | 0.0161 | 0.0025 | 20.67827632 |
| Benzoate | rs266638 | 7.017e-06 | 5 | 125676868 | T | C | 0.0223 | -0.241 | 0.0536 | 285 | 0.0221 | 0.0226 | 3e-04 | 20.21643183 |
| Benzoate | rs148379904 | 2.129e-06 | 5 | 151216215 | A | G | 0.9846 | -0.3107 | 0.0655 | 285 | 0.9839 | 0.9853 | 7e-04 | 22.50090088 |
| Benzoate | rs114019085 | 2.804e-08 | 5 | 152326364 | T | C | 0.0325 | 0.2518 | 0.0453 | 285 | 0.0258 | 0.0368 | 0.0053 | 30.89690998 |
| Benzoate | rs111865472 | 2.254e-07 | 5 | 163160726 | T | G | 0.0175 | 0.3004 | 0.058 | 285 | 0.0161 | 0.0184 | 0.0011 | 26.82525565 |
| Benzoate | rs12153318 | 2.324e-06 | 5 | 171203122 | A | G | 0.3161 | 0.0828 | 0.0175 | 285 | 0.2978 | 0.329 | 0.0154 | 22.38641633 |
| Benzoate | rs557421 | 8.799e-06 | 6 | 12248805 | T | C | 0.4638 | -0.0765 | 0.0172 | 285 | 0.4632 | 0.4645 | 6e-04 | 19.78180773 |
| Benzoate | rs59778363 | 9.389e-07 | 6 | 25137985 | T | C | 0.9293 | -0.1588 | 0.0324 | 285 | 0.9265 | 0.9323 | 0.0029 | 24.02210029 |
| Benzoate | rs115594835 | 5.54e-06 | 6 | 51593142 | A | C | 0.0127 | 0.3769 | 0.0829 | 285 | 0.0032 | 0.0147 | 0.0044 | 20.67013027 |
| Benzoate | rs112167000 | 3.538e-08 | 6 | 99950823 | T | C | 0.014 | 0.387 | 0.0702 | 285 | 0.0129 | 0.0147 | 9e-04 | 30.39119001 |
| Benzoate | rs117550208 | 9.155e-06 | 6 | 113844015 | T | C | 0.0056 | 0.4807 | 0.1084 | 285 | 0.0037 | 0.0065 | 0.0013 | 19.66480661 |
| Benzoate | rs73149720 | 1.25e-06 | 7 | 80923689 | T | C | 0.0209 | 0.2733 | 0.0564 | 285 | 0.0184 | 0.0226 | 0.0021 | 23.48124151 |
| Benzoate | rs28634129 | 9.412e-06 | 7 | 98831939 | T | C | 0.012 | 0.3263 | 0.0736 | 285 | 0.011 | 0.0129 | 9e-04 | 19.65524759 |
| Benzoate | rs73439374 | 1.044e-06 | 7 | 123283234 | A | G | 0.0328 | 0.2 | 0.0409 | 285 | 0.0323 | 0.0331 | 4e-04 | 23.91186088 |
| Benzoate | rs62502119 | 1.212e-06 | 8 | 15542856 | T | C | 0.0171 | 0.3379 | 0.0696 | 285 | 0.0074 | 0.0193 | 0.0047 | 23.56990892 |
| Benzoate | rs7828056 | 7.112e-06 | 8 | 26516038 | A | C | 0.957 | -0.182 | 0.0405 | 285 | 0.9559 | 0.9581 | 0.0011 | 20.19448255 |
| Benzoate | rs75116337 | 6.223e-07 | 8 | 55914981 | T | C | 0.9762 | -0.2547 | 0.0511 | 285 | 0.9742 | 0.9779 | 0.0019 | 24.84368932 |
| Benzoate | rs184127682 | 7.706e-06 | 8 | 56004459 | A | T | 0.9742 | -0.2205 | 0.0493 | 285 | 0.9742 | 0.9743 | 0 | 20.00429954 |
| Benzoate | rs16870106 | 2.366e-07 | 8 | 104121049 | T | G | 0.0942 | 0.1317 | 0.0255 | 285 | 0.0846 | 0.1065 | 0.0109 | 26.67418685 |
| Benzoate | rs55645484 | 3.964e-06 | 9 | 4422016 | T | C | 0.0054 | 0.5075 | 0.11 | 285 | 0.0037 | 0.0065 | 0.0013 | 21.2856405 |
| Benzoate | rs111852815 | 3.63e-06 | 9 | 8137679 | T | C | 0.9932 | -0.509 | 0.1099 | 285 | 0.9926 | 0.9935 | 4e-04 | 21.45063632 |
| Benzoate | rs116958828 | 8.571e-06 | 9 | 100584083 | T | C | 0.057 | 0.1662 | 0.0373 | 285 | 0.0294 | 0.071 | 0.0196 | 19.85383349 |
| Benzoate | rs62583467 | 4.529e-06 | 9 | 106796337 | A | G | 0.981 | -0.2951 | 0.0644 | 285 | 0.9774 | 0.9926 | 0.0064 | 20.99745621 |
| Benzoate | rs55688553 | 2.606e-06 | 9 | 117557293 | T | C | 0.034 | 0.2047 | 0.0435 | 285 | 0.0257 | 0.0387 | 0.0062 | 22.14405602 |
| Benzoate | rs4546775 | 5.39e-06 | 9 | 134971276 | T | C | 0.7043 | -0.0783 | 0.0172 | 285 | 0.7022 | 0.7065 | 0.0021 | 20.7236682 |
| Benzoate | rs10997236 | 1.045e-06 | 10 | 68325773 | A | G | 0.0104 | 0.3768 | 0.0772 | 285 | 0.0097 | 0.011 | 7e-04 | 23.82249188 |
| Benzoate | rs2256262 | 1.998e-07 | 10 | 84471213 | A | T | 0.8915 | -0.137 | 0.0264 | 285 | 0.8774 | 0.9081 | 0.0153 | 26.92980946 |
| Benzoate | rs77570815 | 3.902e-06 | 10 | 120272484 | T | C | 0.0227 | 0.2622 | 0.0568 | 285 | 0.0065 | 0.0257 | 0.0071 | 21.30927643 |
| Benzoate | rs77685103 | 3.337e-06 | 11 | 13428513 | T | C | 0.0208 | 0.2621 | 0.0564 | 285 | 0.0184 | 0.0226 | 0.0021 | 21.59612507 |
| Benzoate | rs149152722 | 2.905e-08 | 11 | 29139072 | A | T | 0.0293 | 0.2767 | 0.0499 | 285 | 0.0184 | 0.0355 | 0.0082 | 30.74802511 |
| Benzoate | rs76818916 | 3.657e-06 | 11 | 85652869 | T | C | 0.9605 | 0.2065 | 0.0446 | 285 | 0.9522 | 0.9807 | 0.0129 | 21.43731525 |
| Benzoate | rs519991 | 4.269e-06 | 11 | 117711562 | T | C | 0.5268 | 0.0716 | 0.0156 | 285 | 0.5037 | 0.5516 | 0.0239 | 21.06574622 |
| Benzoate | rs11046740 | 3.08e-06 | 12 | 23180892 | T | G | 0.0915 | 0.1221 | 0.0262 | 285 | 0.0772 | 0.1 | 0.011 | 21.71844589 |
| Benzoate | rs61940895 | 1.957e-06 | 12 | 106006259 | C | G | 0.9611 | -0.2019 | 0.0424 | 285 | 0.9548 | 0.9706 | 0.0077 | 22.67466736 |
| Benzoate | rs73199884 | 4.612e-06 | 12 | 111791185 | A | G | 0.0318 | 0.2267 | 0.0495 | 285 | 0.0184 | 0.0387 | 0.0096 | 20.97454954 |
| Benzoate | rs149690291 | 3.369e-06 | 12 | 119998443 | T | C | 0.0137 | 0.3299 | 0.071 | 285 | 0.0074 | 0.0161 | 0.0039 | 21.58976592 |
| Benzoate | rs77640146 | 6.89e-06 | 12 | 133090444 | A | G | 0.0158 | 0.2943 | 0.0654 | 285 | 0.0097 | 0.0184 | 0.004 | 20.25 |
| Benzoate | rs78361177 | 4.449e-06 | 13 | 59461967 | A | G | 0.9505 | -0.1827 | 0.0398 | 285 | 0.9419 | 0.9669 | 0.0118 | 21.07225196 |
| Benzoate | rs9539551 | 6.679e-06 | 13 | 63270659 | C | G | 0.0594 | 0.1457 | 0.0324 | 285 | 0.0548 | 0.0625 | 0.0038 | 20.22223175 |
| Benzoate | rs76146397 | 2.968e-07 | 13 | 88005257 | T | G | 0.9965 | -0.6768 | 0.132 | 285 | 0.9963 | 0.9968 | 2e-04 | 26.28892562 |
| Benzoate | rs72712515 | 9.038e-06 | 14 | 63637309 | A | G | 0.9758 | -0.2316 | 0.0522 | 285 | 0.9742 | 0.9779 | 0.0019 | 19.68503105 |
| Benzoate | rs74792748 | 9.858e-06 | 14 | 80131221 | A | T | 0.984 | -0.3086 | 0.0698 | 285 | 0.9807 | 0.9926 | 0.0054 | 19.54703984 |
| Benzoate | rs1420934 | 1.307e-07 | 14 | 87265529 | A | G | 0.7354 | -0.095 | 0.018 | 285 | 0.7022 | 0.771 | 0.0344 | 27.85493827 |
| Benzoate | rs35958750 | 2.173e-06 | 15 | 54204243 | T | C | 0.1699 | 0.0981 | 0.0207 | 285 | 0.1516 | 0.1875 | 0.0179 | 22.45935728 |
| Benzoate | rs61253998 | 5.71e-06 | 15 | 71825948 | A | G | 0.9303 | -0.1459 | 0.0322 | 285 | 0.9194 | 0.9485 | 0.0141 | 20.53046757 |
| Benzoate | rs11854205 | 6.417e-06 | 15 | 93794251 | T | C | 0.073 | 0.1367 | 0.0303 | 285 | 0.0613 | 0.0846 | 0.0116 | 20.35409383 |
| Benzoate | rs75024337 | 6.547e-06 | 16 | 8450962 | A | G | 0.0426 | 0.1915 | 0.0425 | 285 | 0.0257 | 0.0516 | 0.0123 | 20.30297578 |
| Benzoate | rs205163 | 8.852e-06 | 16 | 25596440 | A | G | 0.246 | -0.0882 | 0.0199 | 285 | 0.2065 | 0.2721 | 0.0321 | 19.64404939 |
| Benzoate | rs55642214 | 5.214e-06 | 16 | 85168560 | A | G | 0.1263 | 0.1099 | 0.0241 | 285 | 0.1029 | 0.1484 | 0.0227 | 20.79511372 |
| Benzoate | rs1075149 | 6.182e-06 | 18 | 26217474 | T | C | 0.2095 | -0.0881 | 0.0195 | 285 | 0.2 | 0.2169 | 0.0084 | 20.41186062 |
| Benzoate | rs150639456 | 7.913e-06 | 18 | 34870959 | A | G | 0.0232 | 0.2332 | 0.0522 | 285 | 0.0161 | 0.0257 | 0.0042 | 19.95795716 |
| Benzoate | rs140449099 | 7.178e-06 | 19 | 17664498 | T | G | 0.9908 | -0.4261 | 0.0949 | 285 | 0.989 | 0.9968 | 0.0033 | 20.16000537 |
| Benzoate | rs78663066 | 2.653e-07 | 19 | 35839376 | T | C | 0.0083 | 0.473 | 0.0919 | 285 | 0.0037 | 0.0097 | 0.0025 | 26.49056729 |
| Benzoate | rs113746308 | 3.05e-06 | 19 | 55447014 | T | C | 0.0086 | 0.4006 | 0.0858 | 285 | 0.0074 | 0.0097 | 0.0012 | 21.79953923 |
| Benzoate | rs187147316 | 1.08e-08 | 20 | 1391482 | A | C | 0.0088 | 0.4709 | 0.0824 | 285 | 0.0074 | 0.0097 | 0.0011 | 32.65900562 |
| Benzoate | rs8117270 | 1.196e-06 | 20 | 8433773 | T | C | 0.0092 | 0.4503 | 0.0927 | 285 | 0.0032 | 0.011 | 0.0033 | 23.59632807 |
| Benzoate | rs76290191 | 5.435e-06 | 21 | 36197249 | T | C | 0.9659 | -0.2118 | 0.0466 | 285 | 0.9596 | 0.9807 | 0.0097 | 20.6576102 |
| Gluconate | rs3961459 | 7.769e-08 | 1 | 67830047 | T | C | 0.0068 | 0.379 | 0.0705 | 283 | 0.0065 | 0.0074 | 4e-04 | 28.90015593 |
| Gluconate | rs12408548 | 4.316e-07 | 1 | 110821166 | T | C | 0.9599 | -0.153 | 0.0303 | 283 | 0.9581 | 0.9632 | 0.0025 | 25.49750025 |
| Gluconate | rs2841616 | 4.17e-06 | 1 | 215173838 | T | C | 0.5086 | -0.0564 | 0.0123 | 283 | 0.4669 | 0.5323 | 0.0314 | 21.02558001 |
| Gluconate | rs2489320 | 2.119e-06 | 1 | 225189237 | T | C | 0.0881 | 0.1084 | 0.0229 | 283 | 0.0774 | 0.1029 | 0.0126 | 22.40720047 |
| Gluconate | rs12712328 | 8.038e-06 | 2 | 32654636 | A | C | 0.0794 | 0.0967 | 0.0217 | 283 | 0.0625 | 0.0903 | 0.0136 | 19.85790737 |
| Gluconate | rs74988287 | 8.812e-06 | 2 | 36917860 | T | C | 0.9928 | -0.4091 | 0.092 | 283 | 0.989 | 0.9968 | 0.0039 | 19.77348889 |
| Gluconate | rs77348447 | 6.25e-07 | 2 | 48230828 | T | C | 0.0115 | 0.3095 | 0.0621 | 283 | 0.0037 | 0.0129 | 0.0033 | 24.83922871 |
| Gluconate | rs114949677 | 5.67e-06 | 2 | 152969774 | T | C | 0.9879 | -0.2727 | 0.0601 | 283 | 0.9871 | 0.989 | 9e-04 | 20.58834001 |
| Gluconate | rs76099387 | 4.088e-06 | 2 | 192299471 | A | G | 0.0111 | 0.2918 | 0.0633 | 283 | 0.0074 | 0.0129 | 0.0026 | 21.25020652 |
| Gluconate | rs181910326 | 6.973e-08 | 2 | 194420670 | T | G | 0.0101 | 0.3409 | 0.0632 | 283 | 0.0097 | 0.011 | 6e-04 | 29.09509944 |
| Gluconate | rs74397423 | 2.183e-07 | 2 | 213827083 | T | C | 0.0111 | 0.3276 | 0.0632 | 283 | 0.0074 | 0.0129 | 0.0026 | 26.86913155 |
| Gluconate | rs13015475 | 2.205e-07 | 2 | 219384100 | T | C | 0.0144 | 0.2866 | 0.0553 | 283 | 0.0074 | 0.0161 | 0.0035 | 26.85975887 |
| Gluconate | rs3098326 | 1.627e-06 | 2 | 231730803 | C | G | 0.0121 | 0.2677 | 0.0558 | 283 | 0.0097 | 0.0147 | 0.0025 | 23.01592027 |
| Gluconate | rs55757634 | 9.741e-06 | 3 | 2355498 | A | C | 0.6789 | -0.0588 | 0.0133 | 283 | 0.6654 | 0.6903 | 0.0124 | 19.54570637 |
| Gluconate | rs149857136 | 8.184e-09 | 3 | 24311743 | T | C | 0.0123 | 0.3096 | 0.0537 | 283 | 0.011 | 0.0129 | 9e-04 | 33.239412 |
| Gluconate | rs11917642 | 6.959e-06 | 3 | 119119278 | A | G | 0.0275 | 0.1734 | 0.0386 | 283 | 0.0258 | 0.0294 | 0.0018 | 20.18011222 |
| Gluconate | rs3733510 | 5.22e-06 | 4 | 20611629 | A | G | 0.0383 | 0.1419 | 0.0312 | 283 | 0.0258 | 0.0515 | 0.0128 | 20.6850037 |
| Gluconate | rs116618980 | 7.578e-07 | 4 | 114660286 | T | G | 0.0175 | 0.2622 | 0.053 | 283 | 0.0037 | 0.0193 | 0.005 | 24.47448914 |
| Gluconate | rs138425480 | 3.668e-06 | 4 | 148931874 | A | G | 0.9947 | -0.4691 | 0.1013 | 283 | 0.9935 | 0.9963 | 0.0014 | 21.44430498 |
| Gluconate | rs897710 | 4.812e-06 | 5 | 6762770 | T | C | 0.6873 | -0.0605 | 0.0132 | 283 | 0.6871 | 0.6875 | 2e-04 | 21.00694444 |
| Gluconate | rs1501691 | 4.088e-08 | 5 | 34078031 | T | C | 0.9968 | -0.7158 | 0.1305 | 283 | 0.9963 | 0.9968 | 1e-04 | 30.08585546 |
| Gluconate | rs2165494 | 8.901e-06 | 5 | 111966878 | A | T | 0.0913 | -0.098 | 0.0221 | 283 | 0.0581 | 0.114 | 0.0275 | 19.66380705 |
| Gluconate | rs77585244 | 9.393e-06 | 5 | 128641104 | A | G | 0.9776 | -0.1823 | 0.0411 | 283 | 0.9774 | 0.9779 | 2e-04 | 19.6738653 |
| Gluconate | rs180845128 | 8.042e-06 | 5 | 156887389 | C | G | 0.9784 | -0.1867 | 0.0418 | 283 | 0.9774 | 0.9816 | 0.0018 | 19.94968636 |
| Gluconate | rs35932279 | 7.395e-06 | 6 | 26346514 | T | C | 0.0344 | -0.1365 | 0.0305 | 283 | 0.0331 | 0.0355 | 0.0012 | 20.0292932 |
| Gluconate | rs11751686 | 9.684e-06 | 6 | 105427232 | A | G | 0.0136 | 0.2471 | 0.0559 | 283 | 0.0097 | 0.0184 | 0.0043 | 19.53987922 |
| Gluconate | rs73039639 | 4.106e-06 | 7 | 3670333 | A | G | 0.2374 | 0.0633 | 0.0137 | 283 | 0.2353 | 0.2387 | 0.0017 | 21.34844691 |
| Gluconate | rs184887578 | 8.511e-07 | 7 | 73320273 | T | C | 0.0057 | 0.4156 | 0.0844 | 283 | 0.0032 | 0.0074 | 0.002 | 24.24745626 |
| Gluconate | rs73213462 | 1.186e-06 | 7 | 119853461 | T | C | 0.9881 | -0.2899 | 0.0597 | 283 | 0.9853 | 0.9903 | 0.0025 | 23.58021543 |
| Gluconate | rs150297839 | 5.545e-08 | 7 | 135037216 | A | G | 0.0049 | 0.5464 | 0.1006 | 283 | 0.0032 | 0.0074 | 0.002 | 29.50023122 |
| Gluconate | rs117851846 | 6.1e-07 | 8 | 32826953 | A | G | 0.0056 | 0.4245 | 0.0851 | 283 | 0.0032 | 0.0074 | 0.002 | 24.88262927 |
| Gluconate | rs17432367 | 3.475e-08 | 8 | 119224649 | A | G | 0.0053 | 0.5546 | 0.1006 | 283 | 0.0037 | 0.0065 | 0.0014 | 30.39231411 |
| Gluconate | rs7847753 | 3.608e-06 | 9 | 4163904 | T | C | 0.6946 | -0.0638 | 0.0138 | 283 | 0.6801 | 0.7065 | 0.0131 | 21.37387104 |
| Gluconate | rs4741472 | 6.745e-06 | 9 | 15172627 | T | G | 0.6007 | -0.0568 | 0.0126 | 283 | 0.5772 | 0.6161 | 0.019 | 20.32149156 |
| Gluconate | rs3802367 | 2.4e-06 | 9 | 130164818 | T | C | 0.1917 | 0.0793 | 0.0168 | 283 | 0.1838 | 0.1968 | 0.0064 | 22.28064768 |
| Gluconate | rs138673030 | 9.473e-06 | 9 | 141046950 | T | C | 0.9468 | -0.126 | 0.0285 | 283 | 0.9448 | 0.9484 | 0.0018 | 19.54570637 |
| Gluconate | rs1113204 | 7.885e-06 | 10 | 11845749 | T | C | 0.0114 | 0.2853 | 0.0638 | 283 | 0.0037 | 0.0129 | 0.0034 | 19.99687749 |
| Gluconate | rs140154925 | 1.973e-07 | 10 | 14820055 | A | G | 0.0156 | 0.255 | 0.049 | 283 | 0.0147 | 0.0161 | 7e-04 | 27.08246564 |
| Gluconate | rs138039230 | 6.021e-06 | 10 | 129629748 | A | G | 0.0056 | 0.3837 | 0.0848 | 283 | 0.0032 | 0.0074 | 0.002 | 20.47349062 |
| Gluconate | rs72929778 | 8.971e-06 | 11 | 58600789 | A | T | 0.019 | 0.1938 | 0.0436 | 283 | 0.0184 | 0.0193 | 5e-04 | 19.7576172 |
| Gluconate | rs1887656 | 4.723e-06 | 13 | 27445339 | A | G | 0.1145 | 0.0917 | 0.02 | 283 | 0.0993 | 0.1258 | 0.0131 | 21.022225 |
| Gluconate | rs11843333 | 3.199e-06 | 13 | 103581455 | A | T | 0.8186 | -0.0735 | 0.0158 | 283 | 0.8129 | 0.8272 | 0.007 | 21.64016183 |
| Gluconate | rs117796720 | 6.221e-06 | 14 | 24750970 | A | G | 0.0057 | 0.367 | 0.0812 | 283 | 0.0037 | 0.0065 | 0.0012 | 20.42772817 |
| Gluconate | rs117394010 | 2.021e-07 | 14 | 55156172 | A | G | 0.9606 | -0.1585 | 0.0305 | 283 | 0.9581 | 0.9669 | 0.004 | 27.00591239 |
| Gluconate | rs145530098 | 4.492e-06 | 15 | 79099147 | T | C | 0.0156 | 0.2239 | 0.0488 | 283 | 0.0147 | 0.0161 | 7e-04 | 21.050797 |
| Gluconate | rs57482699 | 1.41e-07 | 16 | 27737743 | T | C | 0.9819 | -0.2322 | 0.0441 | 283 | 0.9807 | 0.989 | 0.003 | 27.72344856 |
| Gluconate | rs74676455 | 1.17e-08 | 16 | 82610621 | A | G | 0.0181 | 0.2339 | 0.041 | 283 | 0.0147 | 0.0193 | 0.002 | 32.54563355 |
| Gluconate | rs80152280 | 2.126e-06 | 16 | 85751949 | A | G | 0.0144 | 0.2747 | 0.0579 | 283 | 0.0037 | 0.0161 | 0.0043 | 22.50920681 |
| Gluconate | rs139969551 | 1.39e-06 | 18 | 65391152 | T | C | 0.0176 | 0.2344 | 0.0486 | 283 | 0.0147 | 0.0193 | 0.0023 | 23.26176565 |
| Gluconate | rs17808132 | 6.786e-06 | 18 | 72065078 | A | C | 0.0355 | 0.1502 | 0.0334 | 283 | 0.0294 | 0.0387 | 0.0044 | 20.22306286 |
| Gluconate | rs4808387 | 8.682e-06 | 19 | 14839160 | T | C | 0.7144 | 0.0617 | 0.0139 | 283 | 0.6935 | 0.739 | 0.0227 | 19.70337974 |
| Gluconate | rs140584719 | 7.674e-06 | 20 | 41284236 | A | C | 0.0085 | 0.3095 | 0.0692 | 283 | 0.0037 | 0.0097 | 0.0024 | 20.00364404 |
| Gluconate | rs5755496 | 4.082e-06 | 22 | 35398977 | A | G | 0.9197 | -0.1029 | 0.0223 | 283 | 0.9097 | 0.9375 | 0.0134 | 21.29222385 |
| Argininosuccinate | rs10907214 | 4.465e-06 | 1 | 5504553 | A | G | 0.2929 | -0.1329 | 0.029 | 291 | 0.2794 | 0.3 | 0.0098 | 21.00167658 |
| Argininosuccinate | rs2275674 | 2.968e-06 | 1 | 159527480 | T | C | 0.7668 | 0.1659 | 0.0355 | 291 | 0.7574 | 0.7742 | 0.0083 | 21.83916683 |
| Argininosuccinate | rs55865364 | 1.012e-06 | 1 | 196901329 | A | G | 0.9777 | 0.476 | 0.0974 | 291 | 0.9774 | 0.9779 | 3e-04 | 23.88339117 |
| Argininosuccinate | rs76305905 | 6.62e-07 | 2 | 78584632 | T | C | 0.0538 | -0.3218 | 0.0647 | 291 | 0.0484 | 0.0588 | 0.0052 | 24.73793922 |
| Argininosuccinate | rs73999882 | 4.451e-06 | 2 | 241360171 | A | G | 0.0084 | -0.7676 | 0.1673 | 291 | 0.0037 | 0.0097 | 0.0025 | 21.05125782 |
| Argininosuccinate | rs73179950 | 2.121e-06 | 3 | 121320269 | T | C | 0.0777 | -0.2497 | 0.0527 | 291 | 0.0552 | 0.0903 | 0.0169 | 22.44997462 |
| Argininosuccinate | rs73181231 | 7.651e-06 | 3 | 169894991 | A | G | 0.9735 | 0.3955 | 0.0884 | 291 | 0.971 | 0.9816 | 0.0046 | 20.01651405 |
| Argininosuccinate | rs116166718 | 2.463e-07 | 4 | 187812394 | A | C | 0.9806 | 0.5568 | 0.1079 | 291 | 0.9774 | 0.989 | 0.0052 | 26.6290433 |
| Argininosuccinate | rs115527748 | 8.743e-06 | 5 | 108818868 | A | G | 0.9723 | 0.3911 | 0.088 | 291 | 0.971 | 0.9743 | 0.0016 | 19.7519641 |
| Argininosuccinate | rs72791757 | 7.305e-07 | 5 | 122823782 | A | G | 0.9481 | 0.3261 | 0.0658 | 291 | 0.9419 | 0.9596 | 0.0084 | 24.56121294 |
| Argininosuccinate | rs877527 | 2.875e-06 | 6 | 38136784 | T | C | 0.3515 | 0.1406 | 0.03 | 291 | 0.3051 | 0.3839 | 0.0388 | 21.96484444 |
| Argininosuccinate | rs35705010 | 2.966e-10 | 6 | 51537274 | A | T | 0.9855 | 0.728 | 0.1155 | 291 | 0.9839 | 0.989 | 0.0024 | 39.728191 |
| Argininosuccinate | rs147098309 | 1.888e-06 | 6 | 157500968 | A | G | 0.0292 | -0.36 | 0.0755 | 291 | 0.029 | 0.0294 | 2e-04 | 22.73584492 |
| Argininosuccinate | rs117808689 | 5.443e-06 | 7 | 108247788 | A | C | 0.0177 | -0.4955 | 0.109 | 291 | 0.0147 | 0.0193 | 0.0022 | 20.66494824 |
| Argininosuccinate | rs73197350 | 3.525e-07 | 7 | 111969273 | T | G | 0.0114 | -0.7492 | 0.1471 | 291 | 0.0037 | 0.0129 | 0.0034 | 25.94001315 |
| Argininosuccinate | rs62489069 | 1.813e-06 | 8 | 11338383 | A | G | 0.7108 | -0.1512 | 0.0317 | 291 | 0.7032 | 0.7243 | 0.0101 | 22.75019156 |
| Argininosuccinate | rs143045856 | 9.688e-06 | 8 | 60195916 | T | C | 0.9387 | 0.2592 | 0.0586 | 291 | 0.9338 | 0.9419 | 0.004 | 19.5647707 |
| Argininosuccinate | rs10979824 | 4.023e-06 | 9 | 112081828 | C | G | 0.0167 | -0.5477 | 0.1188 | 291 | 0.0074 | 0.0193 | 0.005 | 21.25458357 |
| Argininosuccinate | rs73567619 | 2.803e-06 | 9 | 137188940 | T | C | 0.0508 | -0.314 | 0.067 | 291 | 0.0441 | 0.0548 | 0.0052 | 21.96391178 |
| Argininosuccinate | rs114927933 | 7.897e-06 | 10 | 104090311 | T | C | 0.0617 | -0.2577 | 0.0577 | 291 | 0.0581 | 0.0662 | 0.004 | 19.94698269 |
| Argininosuccinate | rs11199251 | 3.205e-06 | 10 | 122025451 | A | G | 0.6733 | -0.1516 | 0.0325 | 291 | 0.6516 | 0.6985 | 0.0234 | 21.75863669 |
| Argininosuccinate | rs10751645 | 8.474e-07 | 11 | 288003 | T | G | 0.12 | -0.2086 | 0.0424 | 291 | 0.1103 | 0.1258 | 0.0075 | 24.20454343 |
| Argininosuccinate | rs77942143 | 7.651e-08 | 12 | 1321953 | A | G | 0.9831 | 0.626 | 0.1165 | 291 | 0.9807 | 0.9926 | 0.0048 | 28.87332609 |
| Argininosuccinate | rs4259905 | 5.929e-06 | 12 | 24313334 | T | G | 0.8006 | 0.1574 | 0.0347 | 291 | 0.7968 | 0.8051 | 0.0041 | 20.57550515 |
| Argininosuccinate | rs11173476 | 2.599e-06 | 12 | 60854597 | T | C | 0.6016 | -0.1344 | 0.0286 | 291 | 0.5935 | 0.614 | 0.01 | 22.08342706 |
| Argininosuccinate | rs2244984 | 5.753e-07 | 12 | 82408722 | T | C | 0.738 | 0.1571 | 0.0314 | 291 | 0.7323 | 0.7463 | 0.0069 | 25.03185728 |
| Argininosuccinate | rs11109672 | 1.38e-06 | 12 | 99315850 | A | G | 0.0563 | -0.3104 | 0.0643 | 291 | 0.0516 | 0.0625 | 0.0054 | 23.30351748 |
| Argininosuccinate | rs11513733 | 3.178e-06 | 12 | 113422313 | A | T | 0.1142 | -0.2141 | 0.046 | 291 | 0.0956 | 0.1258 | 0.0147 | 21.66295369 |
| Argininosuccinate | rs111924941 | 2.326e-06 | 13 | 107987179 | T | C | 0.9761 | 0.4647 | 0.0984 | 291 | 0.9742 | 0.9816 | 0.0033 | 22.30258217 |
| Argininosuccinate | rs1957478 | 6.525e-06 | 14 | 29523110 | T | C | 0.9328 | 0.2671 | 0.0593 | 291 | 0.9161 | 0.9596 | 0.0211 | 20.28796044 |
| Argininosuccinate | rs117566866 | 6.462e-06 | 14 | 53078486 | A | C | 0.9887 | 0.6185 | 0.1371 | 291 | 0.9871 | 0.9926 | 0.0025 | 20.35187836 |
| Argininosuccinate | rs74372983 | 4.121e-06 | 14 | 104245034 | T | C | 0.0528 | -0.2795 | 0.0607 | 291 | 0.0419 | 0.0662 | 0.0121 | 21.2024595 |
| Argininosuccinate | rs55762900 | 5.796e-06 | 17 | 46605231 | T | C | 0.0734 | -0.2652 | 0.0585 | 291 | 0.0404 | 0.0839 | 0.0186 | 20.55111111 |
| Argininosuccinate | rs73620742 | 6.036e-07 | 20 | 57826364 | A | G | 0.031 | -0.4322 | 0.0866 | 291 | 0.0147 | 0.0355 | 0.0085 | 24.90770659 |
| Guanosine | rs148748573 | 1.3e-09 | 1 | 61438685 | T | C | 0.9945 | 0.3528 | 0.0581 | 291 | 0.9935 | 0.9963 | 0.0013 | 36.8726956 |
| Guanosine | rs79579306 | 3.968e-06 | 1 | 242618062 | T | C | 0.0651 | -0.0871 | 0.0189 | 291 | 0.0581 | 0.0735 | 0.0077 | 21.23795526 |
| Guanosine | rs144049374 | 9.184e-07 | 2 | 17597779 | A | G | 0.9827 | 0.1688 | 0.0344 | 291 | 0.9816 | 0.9839 | 0.0011 | 24.07842077 |
| Guanosine | rs77353404 | 6.486e-06 | 2 | 37105041 | A | G | 0.0053 | -0.319 | 0.0707 | 291 | 0.0032 | 0.0074 | 0.0021 | 20.35834822 |
| Guanosine | rs77757485 | 8.292e-07 | 2 | 102456953 | C | G | 0.9945 | 0.2954 | 0.0599 | 291 | 0.9935 | 0.9963 | 0.0013 | 24.32021092 |
| Guanosine | rs114705742 | 8.035e-06 | 2 | 111828347 | A | G | 0.0144 | -0.1689 | 0.0378 | 291 | 0.011 | 0.0161 | 0.0024 | 19.96529352 |
| Guanosine | rs183235011 | 9.017e-06 | 2 | 179930854 | T | C | 0.0263 | -0.1307 | 0.0294 | 291 | 0.0161 | 0.0331 | 0.0083 | 19.76316581 |
| Guanosine | rs12469357 | 6.895e-07 | 2 | 212199324 | A | G | 0.9639 | 0.109 | 0.022 | 291 | 0.9613 | 0.9706 | 0.0042 | 24.54752066 |
| Guanosine | rs112408261 | 1.221e-07 | 2 | 224568633 | A | G | 0.0035 | -0.38 | 0.0718 | 291 | 0.0032 | 0.0037 | 2e-04 | 28.01033512 |
| Guanosine | rs11713274 | 6.219e-06 | 3 | 13813834 | C | G | 0.9147 | -0.0736 | 0.0163 | 291 | 0.9064 | 0.9338 | 0.0126 | 20.38827205 |
| Guanosine | rs112452605 | 5.149e-07 | 3 | 107593303 | A | G | 0.0131 | -0.1777 | 0.0354 | 291 | 0.0097 | 0.0147 | 0.0024 | 25.19813112 |
| Guanosine | rs138170488 | 9.78e-08 | 3 | 176002804 | T | C | 0.9699 | 0.1282 | 0.024 | 291 | 0.9669 | 0.9742 | 0.0036 | 28.53340278 |
| Guanosine | rs77703079 | 2.168e-06 | 3 | 190806988 | T | G | 0.009 | -0.2447 | 0.0517 | 291 | 0.0032 | 0.011 | 0.0034 | 22.40200308 |
| Guanosine | rs4697637 | 5.879e-06 | 4 | 18754324 | T | C | 0.3427 | -0.0413 | 0.0091 | 291 | 0.3346 | 0.3484 | 0.0068 | 20.59763314 |
| Guanosine | rs4488961 | 1.093e-06 | 4 | 63539631 | T | C | 0.9727 | 0.1237 | 0.0254 | 291 | 0.971 | 0.9743 | 0.0016 | 23.71766694 |
| Guanosine | rs79716344 | 3.29e-06 | 4 | 80557563 | T | C | 0.97 | 0.113 | 0.0243 | 291 | 0.9669 | 0.9742 | 0.0036 | 21.62441362 |
| Guanosine | rs113197109 | 9.836e-06 | 4 | 111608513 | A | T | 0.9898 | 0.2035 | 0.046 | 291 | 0.989 | 0.9903 | 7e-04 | 19.57100662 |
| Guanosine | rs115195011 | 4.218e-06 | 5 | 101725016 | T | C | 0.0088 | -0.2476 | 0.0538 | 291 | 0.0032 | 0.011 | 0.0035 | 21.18052542 |
| Guanosine | rs148006681 | 2.996e-07 | 5 | 161074854 | C | G | 0.9913 | 0.2365 | 0.0462 | 291 | 0.9903 | 0.9926 | 0.0011 | 26.20464853 |
| Guanosine | rs183666628 | 8.553e-07 | 6 | 6830046 | T | C | 0.0035 | -0.3553 | 0.0722 | 291 | 0.0032 | 0.0037 | 2e-04 | 24.216759 |
| Guanosine | rs117648110 | 7.636e-06 | 6 | 118435019 | T | C | 0.9604 | 0.1038 | 0.0232 | 291 | 0.9548 | 0.9743 | 0.0088 | 20.01791023 |
| Guanosine | rs7754232 | 6.657e-07 | 6 | 134737409 | A | G | 0.6757 | 0.0479 | 0.0096 | 291 | 0.6548 | 0.7059 | 0.0251 | 24.89594184 |
| Guanosine | rs141357357 | 8.618e-06 | 7 | 21617065 | C | G | 0.9945 | 0.2661 | 0.0598 | 291 | 0.9935 | 0.9963 | 0.0013 | 19.80101173 |
| Guanosine | rs28722507 | 1.792e-06 | 7 | 155897750 | T | C | 0.2254 | -0.0508 | 0.0106 | 291 | 0.2032 | 0.2537 | 0.0251 | 22.96760413 |
| Guanosine | rs77089126 | 1.212e-06 | 8 | 72983510 | T | C | 0.9846 | 0.2027 | 0.0418 | 291 | 0.9816 | 0.9935 | 0.0052 | 23.51553879 |
| Guanosine | rs74548305 | 1.588e-06 | 8 | 80122257 | C | G | 0.0342 | 0.1233 | 0.0257 | 291 | 0.0323 | 0.0368 | 0.0022 | 23.017593 |
| Guanosine | rs72680406 | 2.584e-06 | 8 | 108872163 | A | T | 0.0325 | -0.1135 | 0.0241 | 291 | 0.0258 | 0.0368 | 0.0053 | 22.17980062 |
| Guanosine | rs525462 | 8.773e-06 | 9 | 37394886 | A | G | 0.5503 | -0.039 | 0.0088 | 291 | 0.5355 | 0.5735 | 0.0185 | 19.6410124 |
| Guanosine | rs9410745 | 6.911e-06 | 9 | 77588041 | T | C | 0.7959 | -0.0491 | 0.0109 | 291 | 0.7903 | 0.8051 | 0.0072 | 20.29130545 |
| Guanosine | rs77804652 | 7.811e-06 | 9 | 125849046 | T | C | 0.9797 | 0.1567 | 0.0351 | 291 | 0.9743 | 0.9903 | 0.0076 | 19.93075543 |
| Guanosine | rs34743642 | 9.51e-06 | 10 | 33983973 | T | C | 0.2314 | 0.0481 | 0.0109 | 291 | 0.229 | 0.2353 | 0.0031 | 19.47319249 |
| Guanosine | rs74478884 | 9.22e-06 | 10 | 133300190 | A | G | 0.0299 | -0.1152 | 0.026 | 291 | 0.0257 | 0.0323 | 0.0031 | 19.63171598 |
| Guanosine | rs1505216 | 5.725e-06 | 11 | 4578709 | A | G | 0.1901 | -0.0483 | 0.0106 | 291 | 0.1728 | 0.2 | 0.0131 | 20.76263795 |
| Guanosine | rs11263610 | 2.274e-06 | 11 | 69657107 | A | C | 0.7149 | -0.0444 | 0.0094 | 291 | 0.7132 | 0.7161 | 0.0014 | 22.31054776 |
| Guanosine | rs78337797 | 9.311e-06 | 12 | 23987925 | T | G | 0.8756 | 0.0587 | 0.0133 | 291 | 0.8676 | 0.8806 | 0.0063 | 19.47928091 |
| Guanosine | rs2052430 | 5.122e-08 | 12 | 96599353 | A | G | 0.0629 | -0.097 | 0.0178 | 291 | 0.0548 | 0.0698 | 0.0075 | 29.69637672 |
| Guanosine | rs11842808 | 1.145e-06 | 13 | 22503989 | A | G | 0.0054 | -0.3504 | 0.072 | 291 | 0.0032 | 0.0074 | 0.0021 | 23.68444444 |
| Guanosine | rs141180538 | 9.776e-07 | 13 | 90318047 | T | C | 0.9965 | 0.3532 | 0.0721 | 291 | 0.9963 | 0.9968 | 2e-04 | 23.99776855 |
| Guanosine | rs1760940 | 6.391e-16 | 14 | 20938251 | A | C | 0.7637 | -0.0768 | 0.0095 | 291 | 0.7463 | 0.7806 | 0.0171 | 65.35445983 |
| Guanosine | rs12885644 | 2.735e-06 | 14 | 74142580 | T | C | 0.9844 | 0.1643 | 0.035 | 291 | 0.9816 | 0.9935 | 0.005 | 22.03631837 |
| Guanosine | rs6575657 | 3.103e-06 | 14 | 98762540 | T | G | 0.698 | 0.0438 | 0.0094 | 291 | 0.6806 | 0.7243 | 0.0214 | 21.71163422 |
| Guanosine | rs7169770 | 6.867e-06 | 15 | 51493019 | A | G | 0.2737 | -0.0456 | 0.0101 | 291 | 0.2647 | 0.2806 | 0.0079 | 20.38388393 |
| Guanosine | rs7182581 | 8.158e-06 | 15 | 61468422 | A | G | 0.746 | -0.0432 | 0.0097 | 291 | 0.7426 | 0.7484 | 0.0029 | 19.83462642 |
| Guanosine | rs147274083 | 3.641e-07 | 15 | 86672837 | T | C | 0.9826 | 0.1552 | 0.0305 | 291 | 0.9816 | 0.9839 | 0.0011 | 25.8930825 |
| Guanosine | rs142230029 | 1.618e-06 | 16 | 7774904 | A | G | 0.0103 | -0.2038 | 0.0425 | 291 | 0.0097 | 0.011 | 7e-04 | 22.99484567 |
| Guanosine | rs1106576 | 6.398e-08 | 16 | 24944146 | T | C | 0.9945 | 0.3167 | 0.0586 | 291 | 0.9935 | 0.9963 | 0.0013 | 29.20793777 |
| Guanosine | rs182282543 | 5.28e-06 | 16 | 78291867 | A | C | 0.9909 | 0.2131 | 0.0468 | 291 | 0.989 | 0.9935 | 0.0023 | 20.7336228 |
| Guanosine | rs74567473 | 3.016e-07 | 16 | 80946112 | C | G | 0.0209 | 0.157 | 0.0306 | 291 | 0.0184 | 0.0226 | 0.002 | 26.32427699 |
| Guanosine | rs11078835 | 9.98e-06 | 17 | 10077649 | A | C | 0.5937 | 0.0373 | 0.0084 | 291 | 0.5772 | 0.6032 | 0.0125 | 19.7178288 |
| Guanosine | rs111330182 | 4.926e-06 | 17 | 27143548 | T | C | 0.0055 | -0.2686 | 0.0588 | 291 | 0.0037 | 0.0065 | 0.0013 | 20.8668726 |
| Guanosine | rs16955257 | 6.034e-09 | 17 | 52942491 | A | C | 0.0035 | -0.4286 | 0.0737 | 291 | 0.0032 | 0.0037 | 2e-04 | 33.81966938 |
| Guanosine | rs139941738 | 2.541e-06 | 18 | 43399039 | A | G | 0.0201 | -0.171 | 0.0364 | 291 | 0.0037 | 0.0226 | 0.0064 | 22.06934549 |
| Guanosine | rs4801896 | 8.659e-07 | 19 | 52312466 | A | G | 0.9025 | 0.0736 | 0.015 | 291 | 0.8787 | 0.9387 | 0.0294 | 24.07537778 |
| Guanosine | rs138904904 | 3.447e-07 | 20 | 8627084 | A | C | 0.0035 | -0.3663 | 0.0719 | 291 | 0.0032 | 0.0037 | 2e-04 | 25.95470258 |
| Guanosine | rs73179042 | 5.399e-06 | 22 | 43476352 | T | C | 0.0142 | -0.1673 | 0.0368 | 291 | 0.011 | 0.0161 | 0.0025 | 20.66789491 |
| Guanosine | rs79649215 | 2.92e-06 | 22 | 49431812 | A | G | 0.0556 | -0.093 | 0.0199 | 291 | 0.0452 | 0.0662 | 0.0105 | 21.84035757 |
| Arachidonate (20:4n6) | rs12755262 | 8.045e-07 | 1 | 146993899 | C | G | 0.0989 | -0.2591 | 0.0525 | 291 | 0.0968 | 0.1029 | 0.0029 | 24.35657506 |
| Arachidonate (20:4n6) | rs10753761 | 5.01e-06 | 1 | 167584973 | A | G | 0.1415 | -0.2197 | 0.0481 | 291 | 0.136 | 0.1452 | 0.0045 | 20.86267348 |
| Arachidonate (20:4n6) | rs75144658 | 6.512e-06 | 1 | 237617612 | A | G | 0.0457 | -0.3711 | 0.0823 | 291 | 0.0331 | 0.0516 | 0.0086 | 20.33210006 |
| Arachidonate (20:4n6) | rs146468131 | 7.811e-06 | 2 | 206821401 | A | T | 0.9716 | 0.4876 | 0.1091 | 291 | 0.9677 | 0.989 | 0.0082 | 19.97459087 |
| Arachidonate (20:4n6) | rs142669356 | 9.562e-06 | 3 | 63676360 | A | C | 0.0195 | -0.571 | 0.129 | 291 | 0.011 | 0.0226 | 0.0051 | 19.59263265 |
| Arachidonate (20:4n6) | rs72659043 | 5.662e-06 | 4 | 79435284 | T | C | 0.0239 | -0.5749 | 0.1267 | 291 | 0.0037 | 0.0258 | 0.0062 | 20.58881672 |
| Arachidonate (20:4n6) | rs72728326 | 8.86e-06 | 4 | 137901846 | T | C | 0.334 | 0.1622 | 0.0365 | 291 | 0.3125 | 0.3484 | 0.0176 | 19.74767499 |
| Arachidonate (20:4n6) | rs7701684 | 9.173e-06 | 5 | 10242615 | T | C | 0.3662 | -0.1493 | 0.0337 | 291 | 0.364 | 0.3677 | 0.0018 | 19.62726624 |
| Arachidonate (20:4n6) | rs308203 | 3.546e-06 | 5 | 93742412 | A | G | 0.5526 | -0.1491 | 0.0322 | 291 | 0.5147 | 0.5871 | 0.0362 | 21.44092628 |
| Arachidonate (20:4n6) | rs12109176 | 3.569e-06 | 5 | 175601474 | T | C | 0.0232 | -0.5351 | 0.1154 | 291 | 0.0184 | 0.0258 | 0.0035 | 21.50098144 |
| Arachidonate (20:4n6) | rs1361755 | 5.818e-06 | 6 | 112694966 | T | C | 0.4644 | 0.152 | 0.0335 | 291 | 0.4419 | 0.5 | 0.0283 | 20.58721319 |
| Arachidonate (20:4n6) | rs2582703 | 1.067e-06 | 7 | 62516077 | A | G | 0.5116 | 0.154 | 0.0316 | 291 | 0.5065 | 0.5184 | 0.0059 | 23.75020029 |
| Arachidonate (20:4n6) | rs78171415 | 2.047e-06 | 7 | 88786899 | A | C | 0.9789 | 0.5651 | 0.119 | 291 | 0.9743 | 0.9839 | 0.0048 | 22.5505268 |
| Arachidonate (20:4n6) | rs116993684 | 9.306e-06 | 9 | 130040071 | A | G | 0.9789 | 0.5687 | 0.1283 | 291 | 0.9743 | 0.9871 | 0.0062 | 19.64776449 |
| Arachidonate (20:4n6) | rs12419532 | 5.863e-06 | 11 | 128720468 | A | G | 0.046 | -0.4102 | 0.0905 | 291 | 0.0147 | 0.0516 | 0.0133 | 20.54443271 |
| Arachidonate (20:4n6) | rs1920592 | 4.196e-06 | 12 | 114705586 | T | C | 0.2247 | -0.1767 | 0.0384 | 291 | 0.2226 | 0.2279 | 0.0026 | 21.17437744 |
| Arachidonate (20:4n6) | rs149937479 | 1.824e-06 | 13 | 46713076 | T | C | 0.0366 | -0.4275 | 0.0896 | 291 | 0.0331 | 0.0387 | 0.0027 | 22.76440056 |
| Arachidonate (20:4n6) | rs74642636 | 5.037e-07 | 14 | 73146769 | A | G | 0.0315 | -0.4857 | 0.0967 | 291 | 0.0221 | 0.0355 | 0.0061 | 25.22802535 |
| Arachidonate (20:4n6) | rs4900146 | 9.291e-06 | 14 | 93246238 | C | G | 0.0122 | -0.6674 | 0.1505 | 291 | 0.011 | 0.0129 | 9e-04 | 19.66524696 |
| Arachidonate (20:4n6) | rs55841501 | 2.398e-06 | 16 | 87667133 | T | C | 0.0839 | -0.2903 | 0.0616 | 291 | 0.0677 | 0.1029 | 0.0175 | 22.20918631 |
| Arachidonate (20:4n6) | rs80320661 | 9.494e-06 | 18 | 13182198 | C | G | 0.0538 | -0.3098 | 0.07 | 291 | 0.0515 | 0.0548 | 0.0016 | 19.58694694 |
| Arachidonate (20:4n6) | rs429696 | 6.202e-07 | 21 | 15655186 | T | C | 0.0496 | -0.3871 | 0.0777 | 291 | 0.0484 | 0.0515 | 0.0015 | 24.82014447 |
| Arachidonate (20:4n6) | rs738893 | 5.969e-06 | 22 | 23261552 | A | G | 0.3842 | 0.152 | 0.0336 | 291 | 0.375 | 0.3903 | 0.0075 | 20.46485261 |
| Arachidonate (20:4n6) | rs138426 | 1.507e-06 | 22 | 38871891 | A | G | 0.9693 | 0.4685 | 0.0974 | 291 | 0.9669 | 0.971 | 0.002 | 23.13669261 |
| Maleate | rs114144993 | 1.15e-06 | 1 | 87940529 | T | C | 0.0064 | 0.9877 | 0.2031 | 291 | 0.0032 | 0.0074 | 0.0018 | 23.64995184 |
| Maleate | rs55987981 | 2.061e-06 | 1 | 91914687 | T | C | 0.1233 | 0.2366 | 0.0498 | 291 | 0.0698 | 0.1484 | 0.0366 | 22.57203916 |
| Maleate | rs2200795 | 1.904e-06 | 1 | 164783838 | A | G | 0.3086 | -0.1635 | 0.0343 | 291 | 0.3051 | 0.3129 | 0.0039 | 22.72203759 |
| Maleate | rs34697173 | 6.812e-06 | 1 | 231185006 | T | C | 0.1864 | 0.1806 | 0.0401 | 291 | 0.1765 | 0.1968 | 0.0101 | 20.28367983 |
| Maleate | rs144694605 | 1.073e-06 | 2 | 12922324 | T | C | 0.0063 | 0.987 | 0.2024 | 291 | 0.0032 | 0.0074 | 0.0018 | 23.78007878 |
| Maleate | rs4952675 | 3.919e-06 | 2 | 43903354 | T | C | 0.3267 | 0.1595 | 0.0346 | 291 | 0.3226 | 0.3309 | 0.0041 | 21.25050119 |
| Maleate | rs1851758 | 3.59e-09 | 2 | 168192121 | T | G | 0.0853 | -0.3257 | 0.0552 | 291 | 0.0735 | 0.0936 | 0.0098 | 34.81427549 |
| Maleate | rs7432008 | 8.471e-06 | 3 | 103808803 | A | G | 0.8509 | -0.1897 | 0.0426 | 291 | 0.8309 | 0.8806 | 0.0244 | 19.82966894 |
| Maleate | rs111352680 | 7.851e-06 | 3 | 108542960 | A | G | 0.2661 | -0.1603 | 0.0359 | 291 | 0.2581 | 0.2721 | 0.0069 | 19.93784189 |
| Maleate | rs13129857 | 5.538e-07 | 4 | 44360648 | T | C | 0.0799 | -0.2814 | 0.0562 | 291 | 0.0742 | 0.0846 | 0.0052 | 25.07122504 |
| Maleate | rs746277 | 4.161e-06 | 4 | 84314972 | A | C | 0.904 | 0.2333 | 0.0507 | 291 | 0.9007 | 0.9064 | 0.0028 | 21.17451926 |
| Maleate | rs7705317 | 2.464e-06 | 5 | 123566250 | T | C | 0.9155 | 0.2567 | 0.0545 | 291 | 0.9097 | 0.9228 | 0.0065 | 22.18496423 |
| Maleate | rs111273508 | 3.443e-07 | 6 | 25330739 | A | G | 0.0207 | -0.5083 | 0.0997 | 291 | 0.0193 | 0.0221 | 0.0014 | 25.99261073 |
| Maleate | rs58374447 | 7.259e-06 | 7 | 18941492 | C | G | 0.0744 | 0.2635 | 0.0587 | 291 | 0.0484 | 0.0846 | 0.0163 | 20.15046333 |
| Maleate | rs10099554 | 4.608e-06 | 8 | 17254124 | T | C | 0.0164 | 0.5586 | 0.1219 | 291 | 0.0129 | 0.0184 | 0.0026 | 20.99879876 |
| Maleate | rs142633021 | 1.697e-06 | 8 | 59129039 | A | G | 0.0277 | -0.455 | 0.0951 | 291 | 0.0184 | 0.0323 | 0.0065 | 22.89084156 |
| Maleate | rs10957105 | 1.985e-06 | 8 | 60583239 | T | G | 0.1921 | 0.1905 | 0.0401 | 291 | 0.1613 | 0.2132 | 0.0255 | 22.56842308 |
| Maleate | rs79667516 | 9.424e-06 | 8 | 71318878 | T | G | 0.1136 | 0.2188 | 0.0494 | 291 | 0.1032 | 0.1213 | 0.0089 | 19.61736793 |
| Maleate | rs1184457 | 2.376e-06 | 9 | 24617369 | T | G | 0.6829 | 0.1564 | 0.0331 | 291 | 0.6654 | 0.7 | 0.0173 | 22.32633875 |
| Maleate | rs17179700 | 3.482e-06 | 9 | 78917238 | A | G | 0.0292 | -0.4277 | 0.0922 | 291 | 0.029 | 0.0294 | 2e-04 | 21.51873109 |
| Maleate | rs12214 | 1.89e-06 | 11 | 1774666 | T | C | 0.7122 | -0.1558 | 0.0327 | 291 | 0.7022 | 0.7226 | 0.0102 | 22.70070795 |
| Maleate | rs7938686 | 8.308e-06 | 11 | 112442472 | A | G | 0.6259 | 0.1416 | 0.0318 | 291 | 0.5956 | 0.6581 | 0.0312 | 19.82769669 |
| Maleate | rs12311185 | 2.736e-06 | 12 | 107724557 | T | G | 0.1863 | 0.1841 | 0.0393 | 291 | 0.1801 | 0.1935 | 0.0067 | 21.94433761 |
| Maleate | rs2784013 | 4.665e-06 | 13 | 56953193 | A | T | 0.8135 | 0.1834 | 0.04 | 291 | 0.8051 | 0.8226 | 0.0087 | 21.022225 |
| Maleate | rs8026047 | 9.352e-06 | 15 | 63323347 | C | G | 0.2489 | -0.1688 | 0.0381 | 291 | 0.2206 | 0.2742 | 0.0268 | 19.62885348 |
| Maleate | rs2717695 | 3.704e-06 | 16 | 3150896 | A | C | 0.3906 | -0.1511 | 0.0327 | 291 | 0.375 | 0.4032 | 0.014 | 21.35174742 |
| Maleate | rs1632455 | 7.362e-08 | 16 | 12222225 | T | C | 0.3432 | 0.1688 | 0.0314 | 291 | 0.3346 | 0.3548 | 0.01 | 28.89918455 |
| Maleate | rs2136368 | 5.927e-06 | 18 | 7535953 | A | G | 0.041 | -0.3609 | 0.0797 | 291 | 0.0368 | 0.0452 | 0.0042 | 20.50487477 |
| Maleate | rs76560514 | 7.677e-06 | 19 | 10368105 | A | C | 0.0667 | 0.2665 | 0.0596 | 291 | 0.0548 | 0.0735 | 0.009 | 19.99410218 |
| Maleate | rs113083121 | 6.071e-06 | 19 | 50052141 | T | G | 0.0735 | -0.2731 | 0.0604 | 291 | 0.0588 | 0.0871 | 0.0141 | 20.44417186 |
| Maleate | rs2423016 | 3.392e-06 | 20 | 4786493 | T | C | 0.8069 | 0.1877 | 0.0404 | 291 | 0.7757 | 0.8645 | 0.0424 | 21.585684 |
| Maleate | rs116968927 | 7.117e-08 | 20 | 16538631 | A | G | 0.9867 | 0.7694 | 0.1428 | 291 | 0.9839 | 0.9926 | 0.0041 | 29.03006104 |
| N6-methyllysine | rs6693563 | 2.3e-06 | 1 | 92488274 | A | G | 0.9175 | -0.3487 | 0.0738 | 291 | 0.9154 | 0.9194 | 0.002 | 22.32498476 |
| N6-methyllysine | rs1574417 | 6.231e-06 | 2 | 79633418 | C | G | 0.724 | 0.1947 | 0.0431 | 291 | 0.7129 | 0.7353 | 0.0112 | 20.40691534 |
| N6-methyllysine | rs7556762 | 6.14e-06 | 2 | 101765922 | T | G | 0.8471 | -0.2533 | 0.056 | 291 | 0.8272 | 0.871 | 0.0218 | 20.45946747 |
| N6-methyllysine | rs10928567 | 3.408e-06 | 2 | 137360872 | C | G | 0.8409 | -0.2615 | 0.0563 | 291 | 0.8162 | 0.8645 | 0.0241 | 21.57379744 |
| N6-methyllysine | rs7565133 | 4.564e-06 | 2 | 213585008 | T | C | 0.9107 | -0.3476 | 0.0758 | 291 | 0.8934 | 0.9323 | 0.0193 | 21.02912121 |
| N6-methyllysine | rs17500058 | 4.382e-06 | 4 | 38514293 | A | G | 0.7646 | -0.2174 | 0.0473 | 291 | 0.7645 | 0.7647 | 1e-04 | 21.12500391 |
| N6-methyllysine | rs40810 | 1.443e-06 | 5 | 31682330 | A | G | 0.323 | -0.2152 | 0.0447 | 291 | 0.3226 | 0.3235 | 4e-04 | 23.17765466 |
| N6-methyllysine | rs62456194 | 9.128e-06 | 7 | 10480748 | T | C | 0.9142 | 0.3302 | 0.0744 | 291 | 0.9129 | 0.9154 | 0.0013 | 19.69737108 |
| N6-methyllysine | rs913585 | 3.356e-06 | 9 | 7288847 | T | C | 0.89 | -0.2921 | 0.0629 | 291 | 0.8787 | 0.9 | 0.0106 | 21.56561378 |
| N6-methyllysine | rs67921684 | 3.35e-06 | 9 | 14695165 | A | C | 0.0605 | -0.3825 | 0.0823 | 291 | 0.0478 | 0.0677 | 0.0096 | 21.60047038 |
| N6-methyllysine | rs12379977 | 5.442e-06 | 9 | 136044580 | T | C | 0.2966 | 0.1971 | 0.0434 | 291 | 0.2677 | 0.3272 | 0.0297 | 20.62499204 |
| N6-methyllysine | rs10887626 | 4.959e-06 | 10 | 88348758 | A | G | 0.2963 | -0.1945 | 0.0426 | 291 | 0.2831 | 0.3065 | 0.0116 | 20.84586943 |
| N6-methyllysine | rs2147896 | 3.31e-198 | 10 | 100148176 | A | G | 0.6299 | 0.6467 | 0.0215 | 291 | 0.6097 | 0.6471 | 0.0186 | 904.7504381 |
| N6-methyllysine | rs4762882 | 7.687e-06 | 12 | 22271791 | A | T | 0.0722 | 0.3553 | 0.0794 | 291 | 0.0404 | 0.0839 | 0.0193 | 20.02393423 |
| N6-methyllysine | rs2003746 | 9.452e-07 | 14 | 69373836 | A | G | 0.837 | -0.2722 | 0.0555 | 291 | 0.8161 | 0.8713 | 0.0268 | 24.05416443 |
| N6-methyllysine | rs10139524 | 3.228e-07 | 14 | 71695469 | A | G | 0.464 | -0.2137 | 0.0418 | 291 | 0.4632 | 0.4645 | 6e-04 | 26.13704471 |
| Homocarnosine | rs138551338 | 3.822e-08 | 1 | 2022723 | A | G | 0.0053 | -0.9036 | 0.1643 | 291 | 0.0037 | 0.0065 | 0.0014 | 30.24665256 |
| Homocarnosine | rs76342337 | 1.146e-06 | 1 | 19909381 | A | G | 0.0136 | -0.5873 | 0.1207 | 291 | 0.0037 | 0.0161 | 0.005 | 23.67584355 |
| Homocarnosine | rs144845938 | 2.239e-06 | 1 | 61469193 | T | G | 0.0101 | -0.4776 | 0.101 | 291 | 0.0065 | 0.011 | 0.0018 | 22.36072542 |
| Homocarnosine | rs142014788 | 1.316e-07 | 1 | 65894665 | T | C | 0.0198 | -0.4396 | 0.0833 | 291 | 0.0065 | 0.0221 | 0.0055 | 27.85001059 |
| Homocarnosine | rs138868854 | 7.534e-06 | 1 | 89291775 | T | C | 0.0171 | -0.4128 | 0.0922 | 291 | 0.0147 | 0.0193 | 0.0023 | 20.04552962 |
| Homocarnosine | rs78489432 | 3.932e-06 | 1 | 102591204 | A | G | 0.9413 | -0.2322 | 0.0503 | 291 | 0.9375 | 0.9484 | 0.0052 | 21.31024588 |
| Homocarnosine | rs114737396 | 4.98e-06 | 1 | 240263136 | T | C | 0.9788 | 0.4028 | 0.0882 | 291 | 0.9742 | 0.989 | 0.0068 | 20.85651555 |
| Homocarnosine | rs1375374 | 7.363e-06 | 2 | 70688362 | A | G | 0.9453 | 0.2394 | 0.0534 | 291 | 0.9419 | 0.9485 | 0.0033 | 20.09859866 |
| Homocarnosine | rs151256344 | 5.271e-07 | 2 | 147876181 | A | G | 0.0193 | -0.4459 | 0.0889 | 291 | 0.0097 | 0.0221 | 0.0052 | 25.15772832 |
| Homocarnosine | rs16843660 | 5.35e-08 | 2 | 196859205 | A | G | 0.0422 | -0.3086 | 0.0567 | 291 | 0.0387 | 0.0441 | 0.0026 | 29.62277403 |
| Homocarnosine | rs146372507 | 5.009e-08 | 3 | 22152965 | T | C | 0.0245 | -0.418 | 0.0767 | 291 | 0.0161 | 0.0294 | 0.0064 | 29.70036836 |
| Homocarnosine | rs4858588 | 1.044e-08 | 3 | 24249029 | A | G | 0.9938 | 0.8875 | 0.1551 | 291 | 0.9926 | 0.9968 | 0.0019 | 32.74259738 |
| Homocarnosine | rs77661128 | 9.041e-07 | 3 | 27770591 | T | G | 0.0347 | -0.3092 | 0.063 | 291 | 0.0294 | 0.0387 | 0.0046 | 24.08784077 |
| Homocarnosine | rs12485617 | 3.255e-06 | 3 | 60514662 | T | C | 0.9827 | 0.4567 | 0.0981 | 291 | 0.9807 | 0.9963 | 0.0053 | 21.6732484 |
| Homocarnosine | rs28698507 | 2.176e-06 | 3 | 68094041 | T | C | 0.8544 | -0.1574 | 0.0332 | 291 | 0.8419 | 0.8676 | 0.0128 | 22.47673828 |
| Homocarnosine | rs71315219 | 8.077e-07 | 3 | 100756104 | A | C | 0.9565 | 0.299 | 0.0606 | 291 | 0.9485 | 0.9742 | 0.0119 | 24.34429086 |
| Homocarnosine | rs78898307 | 2.951e-06 | 4 | 3801291 | A | G | 0.0132 | -0.5731 | 0.1226 | 291 | 0.0037 | 0.0161 | 0.0053 | 21.85143067 |
| Homocarnosine | rs5021748 | 2.52e-06 | 4 | 7305217 | C | G | 0.3824 | -0.113 | 0.024 | 291 | 0.3742 | 0.3897 | 0.0077 | 22.16840278 |
| Homocarnosine | rs7658226 | 9.733e-06 | 4 | 11943625 | A | G | 0.9111 | 0.1768 | 0.04 | 291 | 0.9064 | 0.9154 | 0.0045 | 19.5364 |
| Homocarnosine | rs28374330 | 2.761e-07 | 4 | 67197616 | A | T | 0.9939 | 0.8064 | 0.1569 | 291 | 0.9926 | 0.9968 | 0.0019 | 26.41527589 |
| Homocarnosine | rs10007304 | 2.759e-06 | 4 | 92967328 | A | G | 0.0653 | -0.2234 | 0.0477 | 291 | 0.0625 | 0.0677 | 0.0026 | 21.93459295 |
| Homocarnosine | rs10025431 | 7.465e-06 | 4 | 108975251 | T | G | 0.1703 | -0.1402 | 0.0313 | 291 | 0.1544 | 0.1871 | 0.0163 | 20.0635303 |
| Homocarnosine | rs35107973 | 1.44e-06 | 4 | 143125948 | T | C | 0.1301 | -0.1715 | 0.0356 | 291 | 0.0956 | 0.1516 | 0.0272 | 23.20749432 |
| Homocarnosine | rs184161859 | 9.518e-10 | 4 | 145522510 | A | G | 0.0088 | -0.8434 | 0.1379 | 291 | 0.0074 | 0.0097 | 0.0011 | 37.40577533 |
| Homocarnosine | rs115025563 | 5.737e-06 | 4 | 182153781 | A | C | 0.0035 | -0.9213 | 0.2031 | 291 | 0.0032 | 0.0037 | 2e-04 | 20.57701127 |
| Homocarnosine | rs34592834 | 6.836e-07 | 5 | 11647728 | C | G | 0.9276 | 0.2341 | 0.0471 | 291 | 0.9265 | 0.929 | 0.0013 | 24.7036436 |
| Homocarnosine | rs57663815 | 2.896e-06 | 5 | 72583122 | A | G | 0.0085 | -0.6132 | 0.1311 | 291 | 0.0074 | 0.0097 | 0.0012 | 21.87756128 |
| Homocarnosine | rs13436900 | 2.172e-06 | 5 | 81115719 | A | G | 0.0261 | -0.3682 | 0.0777 | 291 | 0.0193 | 0.0294 | 0.0047 | 22.45564483 |
| Homocarnosine | rs150134307 | 9.305e-06 | 5 | 115353080 | T | C | 0.0054 | -0.7344 | 0.1657 | 291 | 0.0037 | 0.0065 | 0.0013 | 19.64356551 |
| Homocarnosine | rs75965538 | 4.231e-07 | 5 | 121254308 | C | G | 0.9673 | 0.3456 | 0.0683 | 291 | 0.9669 | 0.9677 | 4e-04 | 25.60389634 |
| Homocarnosine | rs11738059 | 1.412e-06 | 5 | 148501754 | A | G | 0.5736 | 0.1146 | 0.0238 | 291 | 0.5588 | 0.5903 | 0.0157 | 23.18543888 |
| Homocarnosine | rs114733691 | 1.652e-06 | 5 | 167549001 | A | C | 0.0035 | -0.9469 | 0.1976 | 291 | 0.0032 | 0.0037 | 2e-04 | 22.9633028 |
| Homocarnosine | rs17198844 | 9.274e-08 | 6 | 1162048 | C | G | 0.11 | -0.1972 | 0.0369 | 291 | 0.1097 | 0.1103 | 3e-04 | 28.56018978 |
| Homocarnosine | rs41363444 | 3.24e-06 | 6 | 19673475 | T | G | 0.9136 | 0.1983 | 0.0426 | 291 | 0.9118 | 0.9161 | 0.0022 | 21.66836937 |
| Homocarnosine | rs7759210 | 8.557e-06 | 6 | 36281091 | T | C | 0.0052 | -0.7688 | 0.1727 | 291 | 0.0037 | 0.0065 | 0.0014 | 19.81719004 |
| Homocarnosine | rs142819992 | 8.69e-06 | 6 | 49608072 | A | G | 0.0127 | -0.5091 | 0.1145 | 291 | 0.0097 | 0.0147 | 0.0025 | 19.76947884 |
| Homocarnosine | rs78850140 | 2.786e-08 | 6 | 82276323 | A | C | 0.008 | -0.7804 | 0.1405 | 291 | 0.0037 | 0.0097 | 0.0027 | 30.85189701 |
| Homocarnosine | rs75165826 | 9.122e-06 | 6 | 87575591 | A | G | 0.0069 | -0.6233 | 0.1405 | 291 | 0.0065 | 0.0074 | 5e-04 | 19.68074822 |
| Homocarnosine | rs4896927 | 8.256e-06 | 6 | 147899415 | A | G | 0.3739 | -0.1113 | 0.025 | 291 | 0.3566 | 0.3935 | 0.0184 | 19.820304 |
| Homocarnosine | rs181835912 | 8.329e-06 | 6 | 159299493 | A | G | 0.9846 | 0.4347 | 0.0975 | 291 | 0.9839 | 0.9853 | 7e-04 | 19.87787929 |
| Homocarnosine | rs141096298 | 9.55e-06 | 7 | 11313195 | A | G | 0.0174 | -0.4422 | 0.0999 | 291 | 0.0147 | 0.0193 | 0.0023 | 19.59325091 |
| Homocarnosine | rs10280674 | 3.312e-07 | 7 | 31082525 | A | G | 0.8167 | -0.1588 | 0.0311 | 291 | 0.8129 | 0.8199 | 0.0035 | 26.07235244 |
| Homocarnosine | rs148082874 | 4.021e-07 | 7 | 31449660 | A | G | 0.007 | -0.7211 | 0.1423 | 291 | 0.0065 | 0.0074 | 4e-04 | 25.67918233 |
| Homocarnosine | rs77652393 | 4.755e-08 | 7 | 73726995 | A | C | 0.0161 | -0.5282 | 0.0967 | 291 | 0.011 | 0.0193 | 0.0041 | 29.83622308 |
| Homocarnosine | rs147838381 | 5.909e-06 | 7 | 82845533 | A | G | 0.0321 | 0.3447 | 0.0761 | 291 | 0.0097 | 0.0368 | 0.0102 | 20.51697141 |
| Homocarnosine | rs2715037 | 9.677e-06 | 7 | 84095680 | A | G | 0.0156 | -0.4694 | 0.1061 | 291 | 0.0074 | 0.0193 | 0.0056 | 19.57291016 |
| Homocarnosine | rs73140995 | 5.858e-07 | 7 | 97653031 | T | C | 0.9591 | 0.288 | 0.0577 | 291 | 0.9522 | 0.9677 | 0.0077 | 24.91341998 |
| Homocarnosine | rs111593097 | 6.354e-06 | 7 | 106250455 | C | G | 0.0429 | -0.2396 | 0.0531 | 291 | 0.0404 | 0.0452 | 0.0024 | 20.36031933 |
| Homocarnosine | rs149000370 | 1.509e-07 | 7 | 123644765 | T | C | 0.9738 | 0.3617 | 0.0689 | 291 | 0.9706 | 0.9774 | 0.0034 | 27.55869026 |
| Homocarnosine | rs1512272 | 2.522e-06 | 8 | 23513292 | T | C | 0.9191 | 0.211 | 0.0448 | 291 | 0.9118 | 0.929 | 0.0085 | 22.18241789 |
| Homocarnosine | rs9642764 | 8.639e-06 | 8 | 36994086 | A | C | 0.2255 | 0.1303 | 0.0293 | 291 | 0.2161 | 0.2316 | 0.0076 | 19.7766893 |
| Homocarnosine | rs28859683 | 8.747e-08 | 8 | 37883392 | T | C | 0.2443 | -0.1516 | 0.0283 | 291 | 0.239 | 0.2516 | 0.0062 | 28.69627539 |
| Homocarnosine | rs144311812 | 4.366e-07 | 8 | 76123605 | A | C | 0.9773 | 0.4315 | 0.0854 | 291 | 0.9743 | 0.9903 | 0.0063 | 25.52970866 |
| Homocarnosine | rs10096362 | 2.065e-06 | 8 | 95083587 | T | G | 0.1307 | 0.1664 | 0.0351 | 291 | 0.1097 | 0.1434 | 0.0163 | 22.47462277 |
| Homocarnosine | rs148297945 | 3.815e-07 | 8 | 102725581 | C | G | 0.9858 | 0.444 | 0.0874 | 291 | 0.9839 | 0.989 | 0.0025 | 25.80732999 |
| Homocarnosine | rs74975707 | 6.524e-07 | 8 | 118704759 | T | C | 0.955 | 0.2827 | 0.0568 | 291 | 0.9516 | 0.9596 | 0.0039 | 24.77165059 |
| Homocarnosine | rs138882977 | 5.554e-07 | 8 | 138402118 | A | C | 0.9923 | 0.7317 | 0.1462 | 291 | 0.9903 | 0.9963 | 0.0028 | 25.04790254 |
| Homocarnosine | rs57598379 | 2.494e-06 | 9 | 27399905 | A | G | 0.4044 | -0.1123 | 0.0238 | 291 | 0.4 | 0.4081 | 0.004 | 22.2641233 |
| Homocarnosine | rs73650461 | 1.69e-06 | 9 | 78755845 | A | G | 0.2099 | -0.1419 | 0.0296 | 291 | 0.2 | 0.2169 | 0.0083 | 22.9816586 |
| Homocarnosine | rs77330157 | 7.569e-06 | 9 | 109890195 | T | C | 0.0619 | -0.2192 | 0.049 | 291 | 0.0613 | 0.0625 | 6e-04 | 20.01192836 |
| Homocarnosine | rs185085061 | 2.024e-07 | 9 | 117204663 | A | C | 0.9826 | 0.4643 | 0.0893 | 291 | 0.9816 | 0.9839 | 0.0011 | 27.03301277 |
| Homocarnosine | rs12770596 | 4.475e-06 | 10 | 5394166 | A | G | 0.7357 | -0.1231 | 0.0268 | 291 | 0.7226 | 0.7463 | 0.0118 | 21.09825407 |
| Homocarnosine | rs237594 | 4.879e-06 | 10 | 27623611 | T | G | 0.9639 | 0.3135 | 0.0686 | 291 | 0.9548 | 0.9779 | 0.0113 | 20.88463353 |
| Homocarnosine | rs74156169 | 2.119e-06 | 10 | 64077008 | A | G | 0.0164 | -0.4491 | 0.0947 | 291 | 0.011 | 0.0193 | 0.004 | 22.48982894 |
| Homocarnosine | rs2176106 | 8.532e-06 | 10 | 82347562 | A | C | 0.8686 | -0.1537 | 0.0345 | 291 | 0.8603 | 0.8806 | 0.01 | 19.84767066 |
| Homocarnosine | rs112171702 | 4.098e-06 | 10 | 97135202 | A | C | 0.0182 | -0.4261 | 0.0925 | 291 | 0.011 | 0.0226 | 0.0056 | 21.21971775 |
| Homocarnosine | rs1940187 | 4.133e-07 | 11 | 123714925 | A | G | 0.4591 | -0.122 | 0.0241 | 291 | 0.4387 | 0.4743 | 0.0176 | 25.62628054 |
| Homocarnosine | rs145619335 | 9.35e-08 | 12 | 130442521 | A | G | 0.0061 | -0.8378 | 0.1569 | 291 | 0.0032 | 0.0074 | 0.0019 | 28.51246892 |
| Homocarnosine | rs61954226 | 3.085e-06 | 13 | 21501422 | T | C | 0.7983 | 0.1345 | 0.0288 | 291 | 0.7904 | 0.8097 | 0.0095 | 21.81019724 |
| Homocarnosine | rs1807271 | 4.571e-06 | 13 | 25077609 | T | C | 0.2389 | -0.1271 | 0.0277 | 291 | 0.2387 | 0.239 | 1e-04 | 21.05385187 |
| Homocarnosine | rs73175399 | 1.47e-06 | 13 | 45370880 | A | C | 0.028 | -0.3332 | 0.0692 | 291 | 0.0161 | 0.0331 | 0.0078 | 23.18450332 |
| Homocarnosine | rs73188302 | 5.488e-07 | 13 | 62907858 | A | C | 0.0159 | 0.4878 | 0.0974 | 291 | 0.0097 | 0.0184 | 0.0039 | 25.08220299 |
| Homocarnosine | rs117383961 | 1.654e-06 | 13 | 79786033 | A | T | 0.986 | 0.4761 | 0.0994 | 291 | 0.9853 | 0.9871 | 9e-04 | 22.94159423 |
| Homocarnosine | rs78727650 | 9.706e-06 | 14 | 29817634 | T | C | 0.9726 | 0.3268 | 0.0739 | 291 | 0.9677 | 0.9779 | 0.0051 | 19.55578343 |
| Homocarnosine | rs146544140 | 5.632e-08 | 14 | 85620279 | A | G | 0.9919 | 0.7561 | 0.1392 | 291 | 0.9903 | 0.9963 | 0.0027 | 29.50393928 |
| Homocarnosine | rs143125485 | 8.498e-06 | 14 | 96005059 | T | C | 0.0165 | -0.4307 | 0.0967 | 291 | 0.0129 | 0.0184 | 0.0026 | 19.83795018 |
| Homocarnosine | rs117752860 | 5.775e-07 | 15 | 26986070 | A | G | 0.0258 | -0.3891 | 0.0779 | 291 | 0.0257 | 0.0258 | 0 | 24.94867848 |
| Homocarnosine | rs113824840 | 2.892e-07 | 15 | 61112634 | A | G | 0.0032 | -1.4621 | 0.285 | 291 | 0.0032 | 0.0037 | 1e-04 | 26.31870003 |
| Homocarnosine | rs72743796 | 2.718e-06 | 15 | 80679076 | A | G | 0.0223 | -0.4201 | 0.0896 | 291 | 0.0161 | 0.0257 | 0.0046 | 21.98312067 |
| Homocarnosine | rs144717183 | 7.062e-07 | 15 | 98547088 | T | G | 0.1784 | -0.1489 | 0.03 | 291 | 0.1613 | 0.1949 | 0.0168 | 24.63467778 |
| Homocarnosine | rs62016119 | 8.882e-06 | 16 | 6841932 | A | G | 0.9157 | 0.1953 | 0.044 | 291 | 0.9154 | 0.9161 | 3e-04 | 19.70149277 |
| Homocarnosine | rs71389461 | 9.027e-06 | 16 | 30326856 | A | C | 0.0197 | -0.4653 | 0.1048 | 291 | 0.0037 | 0.0226 | 0.0068 | 19.71258322 |
| Homocarnosine | rs60423909 | 2.088e-06 | 17 | 5357491 | A | C | 0.2217 | 0.1294 | 0.0273 | 291 | 0.2022 | 0.2452 | 0.0214 | 22.4669055 |
| Homocarnosine | rs139707331 | 3.375e-06 | 17 | 13560417 | A | G | 0.0175 | -0.5551 | 0.1195 | 291 | 0.011 | 0.0193 | 0.0035 | 21.5777742 |
| Homocarnosine | rs138748187 | 8.308e-06 | 18 | 23378730 | C | G | 0.9812 | 0.4321 | 0.0969 | 291 | 0.9779 | 0.9935 | 0.0063 | 19.88478861 |
| Homocarnosine | rs117232395 | 8.771e-06 | 18 | 37530701 | A | G | 0.014 | -0.4565 | 0.1027 | 291 | 0.0129 | 0.0147 | 9e-04 | 19.75789516 |
| Homocarnosine | rs9958960 | 6.706e-06 | 18 | 63018983 | A | G | 0.8599 | 0.1515 | 0.0336 | 291 | 0.8529 | 0.871 | 0.0088 | 20.33043686 |
| Homocarnosine | rs79446612 | 9.961e-06 | 18 | 72016239 | T | C | 0.9893 | 0.5929 | 0.1342 | 291 | 0.9871 | 0.9963 | 0.0039 | 19.51901371 |
| Homocarnosine | rs75493168 | 1.857e-07 | 20 | 24569176 | A | G | 0.0334 | -0.348 | 0.0667 | 291 | 0.029 | 0.0368 | 0.0038 | 27.22117202 |
| Homocarnosine | rs6104219 | 6.864e-06 | 20 | 44186645 | A | C | 0.0546 | -0.2445 | 0.0544 | 291 | 0.0441 | 0.0645 | 0.0102 | 20.20039806 |
| Homocarnosine | rs76191754 | 1.591e-06 | 21 | 22886165 | A | G | 0.9758 | 0.4337 | 0.0904 | 291 | 0.971 | 0.9926 | 0.009 | 23.01664309 |

**Supplementary Table S2: Effect of CSF metabolites on individual SNPs Connected to Postpartum Depression**

| exposure | outcome | SNP | b | se | p | lo_ci | up_ci | or | or_lci95 | or_uci95 |
| --- | --- | --- | --- | --- | --- | --- | --- | --- | --- | --- |
| Guanosine | Postpartum Depression | rs1106576 | -0.597960215 | 0.588301231449321 | 0.309430172389402 | -1.751030628 | 0.555110198926429 | 0.549932236497549 | 0.173594939356173 | 1.74213295537778 |
| Guanosine | Postpartum Depression | rs11078835 | -0.389576408 | 0.357868632707775 | 0.27632955993787 | -1.090998928 | 0.311846112600536 | 0.677343731458676 | 0.335880805458951 | 1.36594447521186 |
| Guanosine | Postpartum Depression | rs111330182 | -0.388350707 | 0.208002606105733 | 0.0618949806484268 | -0.796035815 | 0.0193344005956813 | 0.678174460770377 | 0.451113722322909 | 1.01952252055853 |
| Guanosine | Postpartum Depression | rs112408261 | 0.385744736842105 | 0.412147368421053 | 0.349304669448893 | -0.422064105 | 1.19355357894737 | 1.47070920501947 | 0.655692004737621 | 3.29878288907082 |
| Guanosine | Postpartum Depression | rs112452605 | -0.138007316 | 0.289356781091728 | 0.633401174 | -0.705146607 | 0.429131975239167 | 0.87109231907187 | 0.494036139967878 | 1.53592372492293 |
| Guanosine | Postpartum Depression | rs11263610 | -0.185684685 | 0.304481981981982 | 0.541969122602093 | -0.782469369 | 0.4111 | 0.830535434241127 | 0.457275434023128 | 1.50847619663559 |
| Guanosine | Postpartum Depression | rs113197109 | -0.494358722 | 0.297532678132678 | 0.0966075535996296 | -1.077522771 | 0.0888053267813268 | 0.609961936855788 | 0.340437824212223 | 1.09286788350795 |
| Guanosine | Postpartum Depression | rs114705742 | -0.359721729 | 0.270631142687981 | 0.183783440560985 | -0.890158769 | 0.170715310834814 | 0.69787049629077 | 0.410590558729129 | 1.18615301603761 |
| Guanosine | Postpartum Depression | rs115195011 | -1.110008078 | 0.796639741518578 | 0.163510148099566 | -2.671421971 | 0.451405815831987 | 0.329556299058791 | 0.0691538206396232 | 1.57051849405842 |
| Guanosine | Postpartum Depression | rs11713274 | -0.039401087 | 0.3770625 | 0.916776660108167 | -0.778443587 | 0.699641413043478 | 0.961365040829938 | 0.459120035914897 | 2.01303073146924 |
| Guanosine | Postpartum Depression | rs117648110 | 0.771867052023121 | 0.503743737957611 | 0.125457958530583 | -0.215470674 | 1.75920477842004 | 2.16380241642886 | 0.80616191111434 | 5.80781705609423 |
| Guanosine | Postpartum Depression | rs11842808 | -0.373692922 | 0.308413242009132 | 0.225641397572563 | -0.978182877 | 0.23079703196347 | 0.688188206585797 | 0.375993705391537 | 1.25960355424194 |
| Guanosine | Postpartum Depression | rs12469357 | -0.164308257 | 0.335807339449541 | 0.624634115232041 | -0.822490642 | 0.493874128440367 | 0.848480431632562 | 0.439336061771371 | 1.6386522880929 |
| Guanosine | Postpartum Depression | rs12885644 | -0.771113816 | 0.653931832014607 | 0.23832012900643 | -2.052820207 | 0.510592574558734 | 0.46249764395689 | 0.128372355989397 | 1.66627829657767 |
| Guanosine | Postpartum Depression | rs138170488 | -0.43900936 | 0.373287051482059 | 0.239569412077319 | -1.170651981 | 0.292633260530421 | 0.644674745204568 | 0.310164653781074 | 1.33995128728603 |
| Guanosine | Postpartum Depression | rs138904904 | -0.016457412 | 0.109242151242151 | 0.880251225928457 | -0.230572028 | 0.197657204477204 | 0.983677271388144 | 0.794079236691744 | 1.21854461058179 |
| Guanosine | Postpartum Depression | rs139941738 | 0.608426900584795 | 0.683847953216374 | 0.373621200416727 | -0.731915088 | 1.94876888888889 | 1.83753849323508 | 0.480986975252903 | 7.02003980948808 |
| Guanosine | Postpartum Depression | rs141180538 | -0.196857871 | 0.305084937712344 | 0.518761334620219 | -0.794824349 | 0.401108607021518 | 0.821307356697369 | 0.451660562670297 | 1.49347946204819 |
| Guanosine | Postpartum Depression | rs141357357 | 0.185892521608418 | 0.243152574220218 | 0.444563509347986 | -0.290686524 | 0.662471567080045 | 1.20429281796655 | 0.747750043077034 | 1.93958021779266 |
| Guanosine | Postpartum Depression | rs142230029 | -0.247769872 | 0.336436211972522 | 0.461454310355338 | -0.907184848 | 0.411645103042198 | 0.780539546285241 | 0.40365898746863 | 1.50929869575248 |
| Guanosine | Postpartum Depression | rs144049374 | 0.272612559241706 | 0.467840639810427 | 0.560092656211914 | -0.644355095 | 1.18958021327014 | 1.31339128491983 | 0.525001008842956 | 3.28570162389797 |
| Guanosine | Postpartum Depression | rs147274083 | 0.536184922680412 | 0.450869201030928 | 0.234351141837914 | -0.347518711 | 1.41988855670103 | 1.70947263553999 | 0.70643879538926 | 4.13665941159105 |
| Guanosine | Postpartum Depression | rs148006681 | -0.183824101 | 0.259246088794926 | 0.478279896212861 | -0.691946436 | 0.324298232558139 | 0.832082152974292 | 0.500600733112463 | 1.38305971905716 |
| Guanosine | Postpartum Depression | rs148748573 | -0.076055272 | 0.177598072562358 | 0.668473636236613 | -0.424147494 | 0.272036950113379 | 0.926764980888824 | 0.654327365214171 | 1.31263550244568 |
| Guanosine | Postpartum Depression | rs1505216 | 0.191310766045549 | 0.349672877846791 | 0.584300730595045 | -0.494048075 | 0.876669606625259 | 1.21083568023496 | 0.61015144963888 | 2.40288381744858 |
| Guanosine | Postpartum Depression | rs16955257 | -0.025953803 | 0.130498366775548 | 0.842354888923476 | -0.281730602 | 0.22982299580028 | 0.974380101928844 | 0.754476911758703 | 1.25837725215706 |
| Guanosine | Postpartum Depression | rs1760940 | -0.193928385 | 0.209105469 | 0.353709027778003 | -0.603775104 | 0.215918333333333 | 0.823716892298377 | 0.546743720753694 | 1.24100102644501 |
| Guanosine | Postpartum Depression | rs182282543 | -0.010943548 | 0.161002346316283 | 0.945808436965738 | -0.326508146 | 0.304621051149695 | 0.989116115147993 | 0.721438497890782 | 1.35611100891593 |
| Guanosine | Postpartum Depression | rs183235011 | 1.43149961744453 | 1.40041315990819 | 0.306687168063716 | -1.313310176 | 4.17630941086458 | 4.18497034311552 | 0.268928381131524 | 65.1250593152938 |
| Guanosine | Postpartum Depression | rs183666628 | -0.050391782 | 0.168397973543484 | 0.76475524578883 | -0.38045181 | 0.279668246552209 | 0.950856823315365 | 0.683552503756562 | 1.32269093226433 |
| Guanosine | Postpartum Depression | rs2052430 | -0.230194845 | 0.257192783505155 | 0.370771906867211 | -0.734292701 | 0.273903010309278 | 0.794378806398008 | 0.479844732661512 | 1.31508724614774 |
| Guanosine | Postpartum Depression | rs28722507 | -0.576728346 | 0.289387795275591 | 0.0462695942580859 | -1.143928425 | -0.009528268 | 0.561733159807582 | 0.318565101291657 | 0.990516982393872 |
| Guanosine | Postpartum Depression | rs34743642 | 0.317089397089397 | 0.309983367983368 | 0.306343826165823 | -0.290478004 | 0.924656798336798 | 1.3731253198457 | 0.747905979952974 | 2.52100289948196 |
| Guanosine | Postpartum Depression | rs4488961 | 0.249486661277284 | 0.236100242522231 | 0.29064942413923 | -0.213269814 | 0.712243136620857 | 1.28336644587249 | 0.807938114736998 | 2.03855889993201 |
| Guanosine | Postpartum Depression | rs4697637 | -0.382728814 | 0.327065375302663 | 0.241924292266382 | -1.023776949 | 0.258319322033898 | 0.681997822772594 | 0.35923556018992 | 1.29475219552502 |
| Guanosine | Postpartum Depression | rs4801896 | -0.073386549 | 0.313919836956522 | 0.815159809742054 | -0.688669429 | 0.541896331521739 | 0.929241563276941 | 0.502243895660093 | 1.71926406748358 |
| Guanosine | Postpartum Depression | rs525462 | 0.630271794871795 | 0.341292307692308 | 0.0647875342153904 | -0.038661128 | 1.29920471794872 | 1.87812097354915 | 0.962076674562518 | 3.66637970189764 |
| Guanosine | Postpartum Depression | rs6575657 | -0.075478767 | 0.318452054794521 | 0.812643074584845 | -0.699644795 | 0.548687260273973 | 0.927299419559222 | 0.496761724943357 | 1.73097920056727 |
| Guanosine | Postpartum Depression | rs7169770 | -0.113078947 | 0.326287280701754 | 0.728919995640201 | -0.752602018 | 0.526444122807018 | 0.893080151005087 | 0.471139044375371 | 1.69290184212328 |
| Guanosine | Postpartum Depression | rs7182581 | -0.738958333 | 0.35255787037037 | 0.0360829364744585 | -1.429971759 | -0.047944907 | 0.477611168123803 | 0.239315680600415 | 0.953186299135422 |
| Guanosine | Postpartum Depression | rs72680406 | 0.286496035242291 | 0.268782378854626 | 0.286467339198914 | -0.240317427 | 0.813309497797357 | 1.33175288780621 | 0.786378203524619 | 2.25535975721467 |
| Guanosine | Postpartum Depression | rs73179042 | -0.129848775 | 0.769007770472206 | 0.865912774538015 | -1.637104005 | 1.37740645546922 | 0.878228231245033 | 0.194542621786365 | 3.96460590010325 |
| Guanosine | Postpartum Depression | rs74478884 | -0.226398438 | 0.205264756944444 | 0.270045337696379 | -0.628717361 | 0.175920486111111 | 0.797400324170981 | 0.533275362250175 | 1.19234324703284 |
| Guanosine | Postpartum Depression | rs74548305 | -0.073936415 | 0.347417680454177 | 0.831469643344647 | -0.754875069 | 0.607002238442822 | 0.928730745078579 | 0.47006933732406 | 1.83492248561532 |
| Guanosine | Postpartum Depression | rs74567473 | 0.798853503184713 | 0.588917197452229 | 0.174946978812535 | -0.355424204 | 1.95313121019108 | 2.22299081503347 | 0.700876065833089 | 7.05073037106683 |
| Guanosine | Postpartum Depression | rs77089126 | -0.0744889 | 0.749585594474593 | 0.920841769374196 | -1.543676665 | 1.3946988653182 | 0.928217777356506 | 0.213594341143225 | 4.03375968477983 |
| Guanosine | Postpartum Depression | rs77353404 | -0.019069592 | 0.165729467084639 | 0.90839392989361 | -0.343899348 | 0.305760163009404 | 0.981111081917034 | 0.709000286781786 | 1.35765665121187 |
| Guanosine | Postpartum Depression | rs7754232 | 0.222686847599165 | 0.281298538622129 | 0.428571295614971 | -0.328658288 | 0.774031983298539 | 1.24942925069778 | 0.719888969349572 | 2.16849197440775 |
| Guanosine | Postpartum Depression | rs77703079 | -0.078819779 | 0.16234736411933 | 0.627321127157299 | -0.397020613 | 0.239381054352268 | 0.924206470554198 | 0.672320166957244 | 1.27046255964618 |
| Guanosine | Postpartum Depression | rs77757485 | 0.000435551794177387 | 0.551570751523358 | 0.999369944807755 | -1.080643121 | 1.08151422477996 | 1.00043564666063 | 0.339377194779951 | 2.94914183540893 |
| Guanosine | Postpartum Depression | rs77804652 | -0.47511104 | 0.510345245692406 | 0.351874225047576 | -1.475387722 | 0.525165641352904 | 0.621816006055111 | 0.228690041747939 | 1.69073888146165 |
| Guanosine | Postpartum Depression | rs78337797 | 0.484165247018739 | 0.382812606473595 | 0.205958147200079 | -0.266147462 | 1.23447795570698 | 1.62281978962884 | 0.766326115440382 | 3.43658400327071 |
| Guanosine | Postpartum Depression | rs79579306 | 0.0621522388059702 | 0.346270952927669 | 0.857552820236392 | -0.616538829 | 0.740843306544202 | 1.06412433341516 | 0.539809581246762 | 2.09770377611847 |
| Guanosine | Postpartum Depression | rs79649215 | -0.296010753 | 0.311918279569892 | 0.342620114144142 | -0.907370581 | 0.315349075268817 | 0.743779430348898 | 0.403584021734789 | 1.37073771808951 |
| Guanosine | Postpartum Depression | rs79716344 | 0.168966371681416 | 0.534950442477876 | 0.7521131374521 | -0.879536496 | 1.21746923893805 | 1.18408031962423 | 0.414975209958577 | 3.37862640869889 |
| Guanosine | Postpartum Depression | rs9410745 | -0.358297352 | 0.384197556008147 | 0.351033643052779 | -1.111324562 | 0.394729857433809 | 0.698865234892736 | 0.329122728731858 | 1.48398324972444 |
| Guanosine | Postpartum Depression | All - Inverse variance weighted | -0.073775966 | 0.0361724261361857 | 0.0413938032069378 | -0.144673922 | -0.002878011 | 0.928879770854108 | 0.865304404205268 | 0.997126126376797 |
| Guanosine | Postpartum Depression | All - MR Egger | -0.06559166 | 0.0550829731843776 | 0.238948472817902 | -0.173554287 | 0.042370967693962 | 0.936513202261872 | 0.840671512229986 | 1.04328143067949 |
| Argininosuccinate | Postpartum Depression | rs10751645 | -0.040306807 | 0.091535953978907 | 0.659691939574957 | -0.219717277 | 0.139103662511985 | 0.960494707166705 | 0.802745720492703 | 1.1492432272688 |
| Argininosuccinate | Postpartum Depression | rs10907214 | -0.053359293 | 0.107541760722348 | 0.619772524923974 | -0.264141144 | 0.157422558314522 | 0.948039327672222 | 0.767865152665951 | 1.17049010974483 |
| Argininosuccinate | Postpartum Depression | rs10979824 | -0.055419573 | 0.0756861420485667 | 0.464028930378212 | -0.203764411 | 0.0929252656563812 | 0.946088111867372 | 0.81565450764168 | 1.09737972025036 |
| Argininosuccinate | Postpartum Depression | rs11109672 | 0.000875235180412371 | 0.118886597938144 | 0.994126080301705 | -0.232142497 | 0.233892967139175 | 1.00087561831049 | 0.792833139088842 | 1.26350924796063 |
| Argininosuccinate | Postpartum Depression | rs11173476 | -0.315655506 | 0.101329613095238 | 0.00183860238153288 | -0.514261548 | -0.117049464 | 0.729310650074519 | 0.59794198330716 | 0.889541191555512 |
| Argininosuccinate | Postpartum Depression | rs111924941 | 0.249500753174091 | 0.111269851517108 | 0.0249417778304431 | 0.0314118442005595 | 0.467589662147622 | 1.28338453106744 | 1.03191040269931 | 1.59614231068387 |
| Argininosuccinate | Postpartum Depression | rs11199251 | -0.013923879 | 0.106307387862797 | 0.895793086106278 | -0.222286359 | 0.194438601583113 | 0.986172610217914 | 0.800686047975701 | 1.21462890430373 |
| Argininosuccinate | Postpartum Depression | rs114927933 | 0.0016774815677144 | 0.095162980209546 | 0.985936050663944 | -0.18484196 | 0.188196922778425 | 1.00167888932697 | 0.831235642249544 | 1.20707119175973 |
| Argininosuccinate | Postpartum Depression | rs11513733 | -0.006861513 | 0.0924343764595983 | 0.940826432147897 | -0.188032891 | 0.174309864549276 | 0.993161973122731 | 0.828587453571739 | 1.19042437898999 |
| Argininosuccinate | Postpartum Depression | rs115527748 | -0.249071082 | 0.145903860905139 | 0.0878052495356357 | -0.535042649 | 0.036900485809256 | 0.779524561589694 | 0.585644312503667 | 1.03758976079495 |
| Argininosuccinate | Postpartum Depression | rs116166718 | -0.116091595 | 0.138207974137931 | 0.400920976832379 | -0.386979224 | 0.154796034482759 | 0.890393664108182 | 0.679105203776118 | 1.16741982343189 |
| Argininosuccinate | Postpartum Depression | rs117566866 | 0.0541215844785772 | 0.125555537590946 | 0.666426976965723 | -0.191967269 | 0.300210438156831 | 1.0556129405019 | 0.825333881888083 | 1.35014289926627 |
| Argininosuccinate | Postpartum Depression | rs117808689 | -0.04023774 | 0.0576702320887992 | 0.485351609489529 | -0.153271395 | 0.0727959152371342 | 0.960561048550522 | 0.857896861680793 | 1.07551101910405 |
| Argininosuccinate | Postpartum Depression | rs143045856 | 0.171621913580247 | 0.160696759259259 | 0.285526758386669 | -0.143343735 | 0.486587561728395 | 1.18722887323231 | 0.866456186759267 | 1.62675553475859 |
| Argininosuccinate | Postpartum Depression | rs147098309 | -0.091862222 | 0.116467777777778 | 0.430266859192628 | -0.320139067 | 0.136414622222222 | 0.912230826023208 | 0.72604806096897 | 1.14615701725915 |
| Argininosuccinate | Postpartum Depression | rs1957478 | -0.182817671 | 0.109213777611381 | 0.0941417432820973 | -0.396876675 | 0.0312413328341445 | 0.83292000712853 | 0.672416946068733 | 1.03173446524662 |
| Argininosuccinate | Postpartum Depression | rs2244984 | 0.0593269255251432 | 0.0974213876511776 | 0.542542806214754 | -0.131618994 | 0.250272845321451 | 1.06112209193696 | 0.876674949634171 | 1.28437580481402 |
| Argininosuccinate | Postpartum Depression | rs2275674 | -0.067124774 | 0.094546714888487 | 0.477726394748782 | -0.252436335 | 0.118186787221218 | 0.93507852060744 | 0.776905672854477 | 1.1254543122189 |
| Argininosuccinate | Postpartum Depression | rs35705010 | -0.015994643 | 0.0814634615384615 | 0.844343028902815 | -0.175663027 | 0.143673741758242 | 0.98413259218005 | 0.838900622176591 | 1.15450737952504 |
| Argininosuccinate | Postpartum Depression | rs4259905 | -0.013322681 | 0.103353875476493 | 0.89743397058321 | -0.215896277 | 0.189250914866582 | 0.986765673041629 | 0.805818879489558 | 1.20834410594858 |
| Argininosuccinate | Postpartum Depression | rs55762900 | -0.174691176 | 0.11232616892911 | 0.119895225609813 | -0.394850468 | 0.0454681146304676 | 0.839716304883608 | 0.673780783793172 | 1.04651763548043 |
| Argininosuccinate | Postpartum Depression | rs55865364 | -0.102880462 | 0.0812695378151261 | 0.205542919743549 | -0.262168756 | 0.0564078319327731 | 0.902234818214526 | 0.769381174829182 | 1.05802909380949 |
| Argininosuccinate | Postpartum Depression | rs62489069 | 0.100619047619048 | 0.0972162698412698 | 0.300667910400529 | -0.089924841 | 0.291162936507937 | 1.1058552833066 | 0.913999877759953 | 1.33798257239844 |
| Argininosuccinate | Postpartum Depression | rs72791757 | -0.072562098 | 0.110598589389758 | 0.511769307182677 | -0.289335333 | 0.144211137687826 | 0.930007993680779 | 0.748761079210268 | 1.15512797382897 |
| Argininosuccinate | Postpartum Depression | rs73179950 | -0.037009371 | 0.0940148177813376 | 0.693836019079448 | -0.221278414 | 0.147259671605927 | 0.963667104545727 | 0.801493502134084 | 1.15865479372057 |
| Argininosuccinate | Postpartum Depression | rs73181231 | -0.024003641 | 0.0711762326169406 | 0.735934203887384 | -0.163509057 | 0.115501774968394 | 0.976282155146373 | 0.849158808228827 | 1.12243650683584 |
| Argininosuccinate | Postpartum Depression | rs73197350 | -0.179970635 | 0.0817258408969568 | 0.0276563780632035 | -0.340153284 | -0.019787987 | 0.835294739193513 | 0.711661228476021 | 0.980406510016681 |
| Argininosuccinate | Postpartum Depression | rs73567619 | -0.062509554 | 0.0654684713375796 | 0.339676856404574 | -0.190827758 | 0.0658086496815286 | 0.939404087572312 | 0.826274895167288 | 1.06802233119875 |
| Argininosuccinate | Postpartum Depression | rs73620742 | -0.098770245 | 0.0872575196668209 | 0.25765981246068 | -0.269794984 | 0.0722544932901435 | 0.905950830614473 | 0.763536015541186 | 1.07492887144206 |
| Argininosuccinate | Postpartum Depression | rs73999882 | -0.27307061 | 0.186905940594059 | 0.144013928386146 | -0.639406253 | 0.0932650338718083 | 0.761039048998456 | 0.52760559516545 | 1.09775263834882 |
| Argininosuccinate | Postpartum Depression | rs74372983 | -0.026364902 | 0.118678711985689 | 0.824194323243366 | -0.258975177 | 0.206245373881932 | 0.973979618025875 | 0.771842182165695 | 1.22905474493253 |
| Argininosuccinate | Postpartum Depression | rs76305905 | -0.035490056 | 0.116837787445618 | 0.761314592887744 | -0.264492119 | 0.193512007458048 | 0.96513233152057 | 0.767595698013066 | 1.21350395756188 |
| Argininosuccinate | Postpartum Depression | rs77942143 | 0.0454115015974441 | 0.0755492012779553 | 0.547783285879066 | -0.102664933 | 0.193487936102236 | 1.046458391 | 0.902429297190258 | 1.21347474722791 |
| Argininosuccinate | Postpartum Depression | rs877527 | 0.00411915362731152 | 0.0969708392603129 | 0.966117433029483 | -0.185943691 | 0.194181998577525 | 1.00412764900119 | 0.830320347905981 | 1.21431726686148 |
| Argininosuccinate | Postpartum Depression | All - Inverse variance weighted | -0.045248807 | 0.0163696289503435 | 0.00570638501812101 | -0.07733328 | -0.013164334 | 0.955759652717648 | 0.925581324847291 | 0.986921936777054 |
| Argininosuccinate | Postpartum Depression | All - MR Egger | -0.050308682 | 0.0350802374008345 | 0.161243314498565 | -0.119065948 | 0.0184485831061715 | 0.950935842223907 | 0.88774925398301 | 1.01861980955649 |
| Maleate | Postpartum Depression | rs10099554 | -0.273061224 | 0.210257787325456 | 0.194047824867986 | -0.685166488 | 0.139044038668099 | 0.76104619153775 | 0.504006311764113 | 1.14917470701277 |
| Maleate | Postpartum Depression | rs10957105 | 0.0482920209973753 | 0.0828766404199475 | 0.560096876738234 | -0.114146194 | 0.210730236220472 | 1.04947707992469 | 0.892127522455943 | 1.2345792653669 |
| Maleate | Postpartum Depression | rs111273508 | -0.038156404 | 0.0647218178241196 | 0.55549594572973 | -0.165011167 | 0.0886983592366713 | 0.962562380800935 | 0.847884236022218 | 1.09275098836592 |
| Maleate | Postpartum Depression | rs111352680 | -0.088615721 | 0.0892326887086713 | 0.320668119010249 | -0.26351179 | 0.0862803493449782 | 0.915197197508674 | 0.768348563254291 | 1.0901118976265 |
| Maleate | Postpartum Depression | rs113083121 | 0.046188209447089 | 0.0962068839253021 | 0.631161576437393 | -0.142377283 | 0.234753701940681 | 1.0472714987992 | 0.867293979436979 | 1.2645972625212 |
| Maleate | Postpartum Depression | rs114144993 | 0.132564543889845 | 0.198882251695859 | 0.505060968330467 | -0.257244669 | 0.522373757213729 | 1.14175270687196 | 0.773179017348518 | 1.68602511759813 |
| Maleate | Postpartum Depression | rs116968927 | -0.017600208 | 0.073014296854692 | 0.809515178763182 | -0.16070823 | 0.125507813880946 | 0.98255377102835 | 0.851540489012691 | 1.13372402771049 |
| Maleate | Postpartum Depression | rs1184457 | -0.167863171 | 0.0900249360613811 | 0.06223332399081 | -0.344312046 | 0.00858570332480818 | 0.845469511217734 | 0.708707744099427 | 1.00862266618392 |
| Maleate | Postpartum Depression | rs12214 | -0.149363286 | 0.106630937098845 | 0.161288842008145 | -0.358359923 | 0.0596333504492939 | 0.861256175520379 | 0.698821507818527 | 1.06144729601627 |
| Maleate | Postpartum Depression | rs12311185 | 0.12199402498642 | 0.0951444866920152 | 0.199773365577391 | -0.064489169 | 0.30847721890277 | 1.12974735150439 | 0.937546268836389 | 1.36135049613632 |
| Maleate | Postpartum Depression | rs13129857 | -0.108885572 | 0.095682658137882 | 0.255126124341127 | -0.296423582 | 0.0786524378109453 | 0.896833034312531 | 0.74347243970365 | 1.08182825412442 |
| Maleate | Postpartum Depression | rs142633021 | 0.100244835164835 | 0.0827136263736264 | 0.22553126311322 | -0.061873873 | 0.262363542857143 | 1.10544153590657 | 0.94000143932028 | 1.29999906190689 |
| Maleate | Postpartum Depression | rs144694605 | -0.035240729 | 0.0487464032421479 | 0.46971668774485 | -0.13078368 | 0.0603022208713273 | 0.965372994541158 | 0.877407554808129 | 1.06215750420927 |
| Maleate | Postpartum Depression | rs1632455 | 0.0503017180094787 | 0.0824526066350711 | 0.541816593110566 | -0.111305391 | 0.211908827014218 | 1.05158833165404 | 0.894665484422182 | 1.23603518692254 |
| Maleate | Postpartum Depression | rs17179700 | -0.13411971 | 0.11756254383914 | 0.253937723943751 | -0.364542296 | 0.0963028758475567 | 0.874485373625627 | 0.694514460186321 | 1.10109250782193 |
| Maleate | Postpartum Depression | rs1851758 | -0.141552656 | 0.0621728584587043 | 0.0228005819398372 | -0.263411458 | -0.019693853 | 0.868009468632725 | 0.76842565706647 | 0.980498803895211 |
| Maleate | Postpartum Depression | rs2136368 | 0.0552067054585758 | 0.0966489332224993 | 0.567858223900857 | -0.134225204 | 0.244638614574674 | 1.05675902996079 | 0.874393125898443 | 1.27715968290146 |
| Maleate | Postpartum Depression | rs2200795 | -0.051982691 | 0.0863058103975535 | 0.546969051170828 | -0.22114208 | 0.117176697247706 | 0.949345298793619 | 0.801602780868116 | 1.12431807604947 |
| Maleate | Postpartum Depression | rs2423016 | 0.0947831646244006 | 0.0991044219499201 | 0.338871736587834 | -0.099461502 | 0.289027831646244 | 1.099420436 | 0.905324802032055 | 1.33512888684629 |
| Maleate | Postpartum Depression | rs2717695 | -0.080232958 | 0.0880238252812707 | 0.362036523444826 | -0.252759656 | 0.0922937392455327 | 0.922901323813184 | 0.776654523759574 | 1.0966869147598 |
| Maleate | Postpartum Depression | rs2784013 | -0.245165758 | 0.0894721919302072 | 0.00614142177905683 | -0.420531254 | -0.069800262 | 0.7825748095285 | 0.656697853708131 | 0.932580073241353 |
| Maleate | Postpartum Depression | rs34697173 | -0.116196013 | 0.101434108527132 | 0.251988863510309 | -0.315006866 | 0.0826148394241417 | 0.890300695425598 | 0.729783863554232 | 1.08612339606273 |
| Maleate | Postpartum Depression | rs4952675 | 0.0707905956112853 | 0.0896050156739812 | 0.429510606255656 | -0.104835235 | 0.246416426332288 | 1.07335643678475 | 0.900472876678885 | 1.27943225190346 |
| Maleate | Postpartum Depression | rs55987981 | -0.090792899 | 0.0825388841927303 | 0.271331452564055 | -0.252569112 | 0.0709833136094674 | 0.913206816988756 | 0.776802524277058 | 1.07356331182221 |
| Maleate | Postpartum Depression | rs58374447 | -0.109956736 | 0.0833309297912713 | 0.186995698106611 | -0.273285359 | 0.0533718861480076 | 0.895872893285376 | 0.760875634215654 | 1.05482184582091 |
| Maleate | Postpartum Depression | rs7432008 | -0.095648392 | 0.0962667369530838 | 0.320428965119143 | -0.284331197 | 0.0930344122298366 | 0.908783495266801 | 0.752517372214497 | 1.09749950202337 |
| Maleate | Postpartum Depression | rs746277 | 0.0778684097728247 | 0.124970424346335 | 0.533222288660679 | -0.167073622 | 0.322810441491642 | 1.08098040285377 | 0.846137314768329 | 1.38100354512061 |
| Maleate | Postpartum Depression | rs76560514 | -0.157705816 | 0.163219512195122 | 0.333934539126932 | -0.47761606 | 0.162204427767355 | 0.854101007748872 | 0.62026029398559 | 1.17610064437655 |
| Maleate | Postpartum Depression | rs7705317 | -0.011989794 | 0.109912738605376 | 0.91313534317392 | -0.227418761 | 0.203439174133229 | 0.988081797634423 | 0.796587132651804 | 1.22561060654645 |
| Maleate | Postpartum Depression | rs7938686 | 0.172001412429379 | 0.102605225988701 | 0.0936712938033501 | -0.029104831 | 0.373107655367232 | 1.18767951072615 | 0.971314635722167 | 1.45224067292053 |
| Maleate | Postpartum Depression | rs79667516 | 0.0778418647166362 | 0.108996800731261 | 0.4751242233109 | -0.135791865 | 0.291475594149909 | 1.08095170854908 | 0.873024320744577 | 1.33840096827845 |
| Maleate | Postpartum Depression | rs8026047 | -0.064732227 | 0.0877440758293839 | 0.460673062797492 | -0.236710616 | 0.107246161137441 | 0.937318417883703 | 0.789219642422207 | 1.11320824936337 |
| Maleate | Postpartum Depression | All - Inverse variance weighted | -0.036508704 | 0.0171753333415193 | 0.0335326211782446 | -0.070172358 | -0.002845051 | 0.964149701495669 | 0.932233128435399 | 0.997158992251589 |
| Maleate | Postpartum Depression | All - MR Egger | -0.036287191 | 0.0411034579351397 | 0.384350173442596 | -0.116849969 | 0.0442755865957227 | 0.964363297291236 | 0.889718668967938 | 1.04527037770401 |
| N6-methyllysine | Postpartum Depression | rs10139524 | -0.032085353 | 0.0630107627515208 | 0.610609007559248 | -0.155586448 | 0.0914157416939635 | 0.968423920375072 | 0.855913081506591 | 1.09572444891696 |
| N6-methyllysine | Postpartum Depression | rs10887626 | 0.0224987146529563 | 0.0720339331619537 | 0.754785984123984 | -0.118687794 | 0.163685223650386 | 1.02275371957013 | 0.888085022651238 | 1.17784349945661 |
| N6-methyllysine | Postpartum Depression | rs10928567 | -0.067199618 | 0.058591586998088 | 0.251416416916528 | -0.182039128 | 0.0476398929254302 | 0.935008538554944 | 0.833568723811347 | 1.0487929095676 |
| N6-methyllysine | Postpartum Depression | rs12379977 | -0.10297514 | 0.0700086250634196 | 0.141320276339732 | -0.240192045 | 0.0342417656012177 | 0.902149401067094 | 0.78647680790129 | 1.03483476393606 |
| N6-methyllysine | Postpartum Depression | rs1574417 | -0.065986646 | 0.0784848484848485 | 0.400484363920551 | -0.219816949 | 0.0878436569080637 | 0.936143365352217 | 0.802665713154611 | 1.09181741057397 |
| N6-methyllysine | Postpartum Depression | rs17500058 | -0.052957682 | 0.0693215271389144 | 0.444901329002274 | -0.188827875 | 0.08291251149954 | 0.948420147168283 | 0.827929001805532 | 1.08644675279292 |
| N6-methyllysine | Postpartum Depression | rs2003746 | -0.155485672 | 0.0765378398236591 | 0.0422055564638325 | -0.305499838 | -0.005471506 | 0.85599934134302 | 0.73675502392288 | 0.994543435181764 |
| N6-methyllysine | Postpartum Depression | rs2147896 | -0.037057523 | 0.0207428483067883 | 0.0740150281904527 | -0.077713505 | 0.00359845987320241 | 0.963620703585957 | 0.925229461737988 | 1.00360494210295 |
| N6-methyllysine | Postpartum Depression | rs40810 | -0.038666914 | 0.0623573420074349 | 0.535201171739944 | -0.160887305 | 0.0835534758364312 | 0.962071107721084 | 0.851388013015507 | 1.08714334963841 |
| N6-methyllysine | Postpartum Depression | rs4762882 | -0.042876442 | 0.0878370391218688 | 0.62545333965882 | -0.215037039 | 0.129284154235857 | 0.958029754570468 | 0.806511567143871 | 1.13801344956857 |
| N6-methyllysine | Postpartum Depression | rs62456194 | 0.0820781344639612 | 0.0622453058752271 | 0.18729495218268 | -0.039922665 | 0.204078933979406 | 1.08554062465084 | 0.960863744627303 | 1.22639495386977 |
| N6-methyllysine | Postpartum Depression | rs6693563 | -0.034709206 | 0.0709030685402925 | 0.624466256431495 | -0.17367922 | 0.104260808718096 | 0.965886249715481 | 0.840566491368828 | 1.10988988612928 |
| N6-methyllysine | Postpartum Depression | rs67921684 | -0.055374902 | 0.0634766013071895 | 0.383008113841095 | -0.179789041 | 0.0690392366013072 | 0.946130375322296 | 0.835446438166027 | 1.07147824948847 |
| N6-methyllysine | Postpartum Depression | rs7556762 | 0.0227731148835373 | 0.0725444137386498 | 0.75358208754997 | -0.119413936 | 0.164960165811291 | 1.0230344019345 | 0.887440381162232 | 1.17934613947903 |
| N6-methyllysine | Postpartum Depression | rs7565133 | -0.001391904 | 0.0588722669735328 | 0.981137542322152 | -0.116781548 | 0.113997738780207 | 0.998609063761845 | 0.889779546272714 | 1.12074959062013 |
| N6-methyllysine | Postpartum Depression | rs913585 | 0.0248371448134201 | 0.0591691201643273 | 0.674656899936613 | -0.091134331 | 0.140808620335502 | 1.02514815623504 | 0.912895072820355 | 1.15120430980671 |
| N6-methyllysine | Postpartum Depression | All - Inverse variance weighted | -0.032267291 | 0.0132904556251648 | 0.0151884385587534 | -0.058316584 | -0.006217998 | 0.968247743153655 | 0.943351249805943 | 0.99380129333056 |
| N6-methyllysine | Postpartum Depression | All - MR Egger | -0.027604633 | 0.0321517023261779 | 0.40503577166258 | -0.09062197 | 0.0354127035427718 | 0.972772893066069 | 0.913362924618311 | 1.0360472009301 |
| Homocarnosine | Postpartum Depression | rs10007304 | 0.0480662488809311 | 0.104909131602507 | 0.646830091756163 | -0.157555649 | 0.253688146821844 | 1.0492401640087 | 0.854229275229583 | 1.28876983462447 |
| Homocarnosine | Postpartum Depression | rs10025431 | 0.240829529243937 | 0.14220970042796 | 0.0903638099323277 | -0.037901484 | 0.519560542082739 | 1.27230412617409 | 0.962807788581264 | 1.68128863172672 |
| Homocarnosine | Postpartum Depression | rs10096362 | -0.189264423 | 0.104216346153846 | 0.0693592768552403 | -0.393528462 | 0.0149996153846154 | 0.827567649776283 | 0.674672115097255 | 1.01511267418769 |
| Homocarnosine | Postpartum Depression | rs10280674 | 0.161465365239295 | 0.105824307304786 | 0.127062888997404 | -0.045950277 | 0.368881007556675 | 1.17523175358292 | 0.955089450848253 | 1.44611551661776 |
| Homocarnosine | Postpartum Depression | rs111593097 | -0.187558848 | 0.211327629382304 | 0.374795564434874 | -0.601761002 | 0.226643305509182 | 0.828980332843896 | 0.547846028354612 | 1.25438235685658 |
| Homocarnosine | Postpartum Depression | rs112171702 | 0.00716911523116639 | 0.133852851443323 | 0.957285984998437 | -0.255182474 | 0.26952070406008 | 1.00719487485888 | 0.774775109060007 | 1.30933674053206 |
| Homocarnosine | Postpartum Depression | rs113824840 | 0.0267977566513918 | 0.0569424115997538 | 0.637918157233899 | -0.08480937 | 0.138404883386909 | 1.02716004546828 | 0.918687397011283 | 1.1484404406099 |
| Homocarnosine | Postpartum Depression | rs114733691 | -0.028547788 | 0.0490449889111839 | 0.560517185522794 | -0.124675966 | 0.0675803907487591 | 0.971855850458299 | 0.882782908112643 | 1.06991626751059 |
| Homocarnosine | Postpartum Depression | rs114737396 | -0.204576216 | 0.156020357497517 | 0.189785171868523 | -0.510376117 | 0.101223684210526 | 0.814992623677564 | 0.600269764577684 | 1.10652412605879 |
| Homocarnosine | Postpartum Depression | rs115025563 | 0.115149245631173 | 0.191275371757299 | 0.547169015348257 | -0.259750483 | 0.49004897427548 | 1.1220408847763 | 0.771244000276316 | 1.63239616341718 |
| Homocarnosine | Postpartum Depression | rs117232395 | -0.073826725 | 0.160283242059146 | 0.64508443062738 | -0.38798188 | 0.240328429353779 | 0.928832623294866 | 0.678424636534089 | 1.27166673442802 |
| Homocarnosine | Postpartum Depression | rs11738059 | -0.23832897 | 0.11758202443281 | 0.0426709311329371 | -0.468789738 | -0.007868202 | 0.787943438438677 | 0.6257591425561 | 0.992162670836095 |
| Homocarnosine | Postpartum Depression | rs117383961 | -0.242360849 | 0.128104599873976 | 0.0585045595606725 | -0.493445864 | 0.00872416719176639 | 0.784772942265274 | 0.61051899973767 | 1.0087623336478 |
| Homocarnosine | Postpartum Depression | rs117752860 | 0.0696975070675919 | 0.0941639681315857 | 0.459195799692318 | -0.11486387 | 0.2542588846055 | 1.0721838041728 | 0.891487493420216 | 1.28950559420645 |
| Homocarnosine | Postpartum Depression | rs12485617 | -0.084929713 | 0.109275454346398 | 0.437036301479145 | -0.299109604 | 0.129250177359317 | 0.918576845996664 | 0.741478136249864 | 1.13797478408296 |
| Homocarnosine | Postpartum Depression | rs12770596 | 0.0347116978066613 | 0.126735174654752 | 0.784167938935175 | -0.213689245 | 0.283112640129976 | 1.03532118040138 | 0.807599311946738 | 1.32725465553441 |
| Homocarnosine | Postpartum Depression | rs13436900 | -0.235136339 | 0.156132536664856 | 0.132065959069951 | -0.541156111 | 0.070883432916893 | 0.790463071379534 | 0.582074920118641 | 1.07345608892995 |
| Homocarnosine | Postpartum Depression | rs1375374 | -0.02857949 | 0.143393065998329 | 0.842021247794784 | -0.3096299 | 0.252470918964077 | 0.971825040321668 | 0.73371845536446 | 1.28720206244107 |
| Homocarnosine | Postpartum Depression | rs138551338 | -0.024742032 | 0.0376497343957503 | 0.511075781187512 | -0.098535511 | 0.0490514475431607 | 0.975561543355097 | 0.906163513009255 | 1.05027438338676 |
| Homocarnosine | Postpartum Depression | rs138748187 | 0.109061096968294 | 0.100403610275399 | 0.277378642542737 | -0.087729979 | 0.305852173108077 | 1.11523048546161 | 0.916008184621616 | 1.35778157508135 |
| Homocarnosine | Postpartum Depression | rs138868854 | 0.0797330426356589 | 0.241247093023256 | 0.741019441902274 | -0.39311126 | 0.55257734496124 | 1.08299791481201 | 0.674953648274829 | 1.73772597049447 |
| Homocarnosine | Postpartum Depression | rs138882977 | -0.054864289 | 0.083503348366817 | 0.511160982523265 | -0.218530851 | 0.108802274156075 | 0.946613605453774 | 0.803698683798961 | 1.1149418757221 |
| Homocarnosine | Postpartum Depression | rs139707331 | 0.40779138893893 | 0.342875157629256 | 0.234310204234634 | -0.26424392 | 1.07982669789227 | 1.50349348308207 | 0.767786238384038 | 2.94416927610988 |
| Homocarnosine | Postpartum Depression | rs141096298 | -0.018936725 | 0.104111035730439 | 0.85566928479928 | -0.222994355 | 0.185120904568069 | 0.981241447876285 | 0.800119365559367 | 1.20336392352812 |
| Homocarnosine | Postpartum Depression | rs142014788 | -0.175021611 | 0.284369881710646 | 0.538243262374485 | -0.732386579 | 0.382343357597816 | 0.839438879833066 | 0.480760247682632 | 1.46571526321487 |
| Homocarnosine | Postpartum Depression | rs142819992 | 0.10979375368297 | 0.238982518169318 | 0.645931371462724 | -0.358611982 | 0.578199489294834 | 1.11604786595829 | 0.698645385800026 | 1.78282554272329 |
| Homocarnosine | Postpartum Depression | rs143125485 | -0.143777339 | 0.0755809147898769 | 0.0571323519290798 | -0.291915932 | 0.00436125377292776 | 0.866080568770719 | 0.746831317797682 | 1.00437077788081 |
| Homocarnosine | Postpartum Depression | rs144311812 | 0.203712166859791 | 0.163445886442642 | 0.212632816530379 | -0.116641771 | 0.52406610428737 | 1.22594523500112 | 0.889903925848369 | 1.68888087305509 |
| Homocarnosine | Postpartum Depression | rs144717183 | 0.115248488918737 | 0.127189388851578 | 0.364873838909234 | -0.134042713 | 0.364539691067831 | 1.12215224532829 | 0.874552708834236 | 1.4398510792721 |
| Homocarnosine | Postpartum Depression | rs144845938 | -0.024422529 | 0.0863126046901172 | 0.777211809991363 | -0.193595235 | 0.144750175879397 | 0.975873287563815 | 0.823991360048342 | 1.15575079977142 |
| Homocarnosine | Postpartum Depression | rs145619335 | -0.020233827 | 0.0824653855335402 | 0.806176574128755 | -0.181865982 | 0.141398328956792 | 0.979969503490519 | 0.833713065207561 | 1.15188338512168 |
| Homocarnosine | Postpartum Depression | rs146372507 | 0.0206077990430622 | 0.15401028708134 | 0.89355444952947 | -0.281252364 | 0.322467961722488 | 1.02082160590436 | 0.754837817824784 | 1.38053066032663 |
| Homocarnosine | Postpartum Depression | rs146544140 | 0.00388460521095093 | 0.110895516466076 | 0.972056284454643 | -0.213470607 | 0.22123981748446 | 1.00389216006915 | 0.807775902708205 | 1.24762259640266 |
| Homocarnosine | Postpartum Depression | rs147838381 | -0.042690455 | 0.0934218160719466 | 0.64769654662088 | -0.225797215 | 0.140416304032492 | 0.95820795219669 | 0.797879883358118 | 1.15075276216842 |
| Homocarnosine | Postpartum Depression | rs148082874 | -0.197250035 | 0.214219941755651 | 0.35716384429966 | -0.617121121 | 0.222621051171821 | 0.820985332851448 | 0.539495346170939 | 1.2493470454213 |
| Homocarnosine | Postpartum Depression | rs148297945 | -0.154986937 | 0.0983817567567568 | 0.115172779465281 | -0.34781518 | 0.0378413063063063 | 0.856426364962156 | 0.706229389341796 | 1.03856640586125 |
| Homocarnosine | Postpartum Depression | rs149000370 | 0.0997343102018247 | 0.106073265136854 | 0.347094548648127 | -0.108169289 | 0.307637909870058 | 1.10487732444162 | 0.897475650395396 | 1.36020838172874 |
| Homocarnosine | Postpartum Depression | rs150134307 | 0.00347476851851852 | 0.0646429738562091 | 0.957131774178721 | -0.12322546 | 0.130174997276688 | 1.00348081252513 | 0.884064318736443 | 1.1390276926291 |
| Homocarnosine | Postpartum Depression | rs1512272 | 0.103074407582938 | 0.116398578199052 | 0.375870964198425 | -0.125066806 | 0.331215620853081 | 1.10857389231112 | 0.882437948741811 | 1.39266004648377 |
| Homocarnosine | Postpartum Depression | rs151256344 | -0.067522539 | 0.118106750392465 | 0.567520016634795 | -0.299011769 | 0.163966692083427 | 0.934706653319036 | 0.741550681736246 | 1.17817507188217 |
| Homocarnosine | Postpartum Depression | rs16843660 | 0.0804316267012314 | 0.124266688269605 | 0.517470089674694 | -0.163131082 | 0.323994335709657 | 1.08375474422205 | 0.849479829340203 | 1.38263947542587 |
| Homocarnosine | Postpartum Depression | rs17198844 | -0.115886917 | 0.112550709939148 | 0.303178180267971 | -0.336486308 | 0.10471247464503 | 0.890575926747279 | 0.714275663145563 | 1.11039129880048 |
| Homocarnosine | Postpartum Depression | rs1807271 | -0.028080881 | 0.1149653815893 | 0.807033252588659 | -0.253413029 | 0.197251266719119 | 0.972309722047736 | 0.776147244205731 | 1.21805005770008 |
| Homocarnosine | Postpartum Depression | rs181835912 | -0.424195997 | 0.123987347596043 | 0.000623260842680608 | -0.667211199 | -0.181180796 | 0.654295629203556 | 0.513137623157379 | 0.834284509798219 |
| Homocarnosine | Postpartum Depression | rs184161859 | 0.033233459805549 | 0.0521563907991463 | 0.524001975288298 | -0.068993066 | 0.135459985771876 | 1.03379185991746 | 0.93333315163778 | 1.14506337609057 |
| Homocarnosine | Postpartum Depression | rs185085061 | -0.033048245 | 0.0534010338143442 | 0.536002658651285 | -0.137714271 | 0.0716177816067198 | 0.967491882137076 | 0.87134762551347 | 1.07424466951356 |
| Homocarnosine | Postpartum Depression | rs1940187 | 0.072588606557377 | 0.10938606557377 | 0.506946278629716 | -0.141808082 | 0.286985295081967 | 1.07528807944408 | 0.867787784630029 | 1.33240462043089 |
| Homocarnosine | Postpartum Depression | rs2176106 | -0.221387768 | 0.160950553025374 | 0.168975941564784 | -0.536850852 | 0.0940753155497722 | 0.801405860178892 | 0.584586305318057 | 1.09864248766423 |
| Homocarnosine | Postpartum Depression | rs237594 | 0.0715298245614035 | 0.120814992025518 | 0.553809854676328 | -0.16526756 | 0.308327208931419 | 1.07415018628178 | 0.847666872157634 | 1.36114629530386 |
| Homocarnosine | Postpartum Depression | rs2715037 | -0.14070409 | 0.0922718363868769 | 0.127287375339114 | -0.32155689 | 0.0401487089902003 | 0.868746344112273 | 0.725019382757894 | 1.04096556362061 |
| Homocarnosine | Postpartum Depression | rs28374330 | -0.059484871 | 0.0706114831349206 | 0.399550164856806 | -0.197883378 | 0.0789136359126984 | 0.942249788750538 | 0.820465531909394 | 1.0821108625176 |
| Homocarnosine | Postpartum Depression | rs28698507 | 0.0721944091486658 | 0.0982852604828462 | 0.462619976434151 | -0.120444701 | 0.264833519695044 | 1.07486428720393 | 0.886526109644688 | 1.30321399825378 |
| Homocarnosine | Postpartum Depression | rs28859683 | -0.052876583 | 0.102080474934037 | 0.604465807568801 | -0.252954314 | 0.147201147757256 | 0.948497065813729 | 0.776503356358018 | 1.15858698676694 |
| Homocarnosine | Postpartum Depression | rs34592834 | 0.000390201196070055 | 0.0842486117043998 | 0.996304575344694 | -0.164737078 | 0.165517480136694 | 1.00039027733446 | 0.848116663522188 | 1.18000358916322 |
| Homocarnosine | Postpartum Depression | rs35107973 | 0.0862816326530612 | 0.114648979591837 | 0.451707039637391 | -0.138430367 | 0.310993632653061 | 1.09011329657681 | 0.870723879972069 | 1.36478053112736 |
| Homocarnosine | Postpartum Depression | rs41363444 | -0.141531014 | 0.140222894604135 | 0.312816946203551 | -0.416367887 | 0.133305859808371 | 0.868028254472703 | 0.659437627297819 | 1.14259942013081 |
| Homocarnosine | Postpartum Depression | rs4858588 | -0.039982085 | 0.232459718309859 | 0.863440867135475 | -0.495603132 | 0.415638963380282 | 0.960806652322945 | 0.609203366184573 | 1.51533867734463 |
| Homocarnosine | Postpartum Depression | rs4896927 | -0.05099407 | 0.125118598382749 | 0.683592427466018 | -0.296226523 | 0.194238382749326 | 0.950284305624809 | 0.743618962208185 | 1.21438573706517 |
| Homocarnosine | Postpartum Depression | rs5021748 | -0.095177876 | 0.122647787610619 | 0.437733614828581 | -0.33556754 | 0.145211787610619 | 0.909211193136955 | 0.714932218685566 | 1.15628443105472 |
| Homocarnosine | Postpartum Depression | rs57598379 | 0.0975992876224399 | 0.120349065004452 | 0.417383823069067 | -0.13828488 | 0.333483455031166 | 1.10252090280829 | 0.87085056868096 | 1.39582195251977 |
| Homocarnosine | Postpartum Depression | rs57663815 | -0.162326973 | 0.146750815394651 | 0.268665850211748 | -0.449958571 | 0.125304624918461 | 0.850163178467373 | 0.637654568192394 | 1.1334936909033 |
| Homocarnosine | Postpartum Depression | rs60423909 | 0.158262751159196 | 0.114223338485317 | 0.165882737781383 | -0.065614992 | 0.382140494590417 | 1.17147396041407 | 0.936491351299456 | 1.46541795396613 |
| Homocarnosine | Postpartum Depression | rs6104219 | -0.001891227 | 0.127536605316973 | 0.988168686830925 | -0.251862973 | 0.248080519427403 | 0.998110560249035 | 0.777351248558227 | 1.28156311876821 |
| Homocarnosine | Postpartum Depression | rs61954226 | 0.0685895167286245 | 0.15254126394052 | 0.65296596189897 | -0.230391361 | 0.367570394052045 | 1.07099649276243 | 0.794222714198757 | 1.44422145955193 |
| Homocarnosine | Postpartum Depression | rs62016119 | -0.119332821 | 0.129652329749104 | 0.357360476898902 | -0.373451388 | 0.13478574500768 | 0.887512368580839 | 0.688354448038716 | 1.14429158789959 |
| Homocarnosine | Postpartum Depression | rs71315219 | -0.141176589 | 0.115554180602007 | 0.221807850205068 | -0.367662783 | 0.0853096053511705 | 0.86833595990151 | 0.69235061499589 | 1.08905419151329 |
| Homocarnosine | Postpartum Depression | rs71389461 | 0.0124412207178165 | 0.0984921555985386 | 0.899481103670907 | -0.180603404 | 0.205485845690952 | 1.0125189346553 | 0.834766357840347 | 1.2281215976262 |
| Homocarnosine | Postpartum Depression | rs72743796 | -0.22776815 | 0.134909307307784 | 0.0913525645644995 | -0.492190393 | 0.036654091882885 | 0.796308862293679 | 0.611285970327072 | 1.03733413647326 |
| Homocarnosine | Postpartum Depression | rs73140995 | 0.0872239583333333 | 0.148029513888889 | 0.555704603277711 | -0.202913889 | 0.377361805555556 | 1.09114102248078 | 0.816348535078444 | 1.45843188268355 |
| Homocarnosine | Postpartum Depression | rs73175399 | 0.192602641056423 | 0.14453481392557 | 0.182673218988985 | -0.090685594 | 0.47589087635054 | 1.21240093943446 | 0.913304814059738 | 1.609447378 |
| Homocarnosine | Postpartum Depression | rs73188302 | -0.056215252 | 0.174824723247232 | 0.747792057147743 | -0.39887171 | 0.286441205412054 | 0.945335628459595 | 0.671076788462299 | 1.33167987002325 |
| Homocarnosine | Postpartum Depression | rs73650461 | -0.089833686 | 0.110909795630726 | 0.417957011146856 | -0.307216885 | 0.127549513742072 | 0.914083197742474 | 0.735491066531708 | 1.13604111649544 |
| Homocarnosine | Postpartum Depression | rs74156169 | -0.122738588 | 0.103935871743487 | 0.237639709244294 | -0.326452897 | 0.080975720329548 | 0.884494849655178 | 0.721478358111952 | 1.08434456871836 |
| Homocarnosine | Postpartum Depression | rs74975707 | 0.118423417049876 | 0.111018394057305 | 0.286106936090736 | -0.099172635 | 0.336019469402193 | 1.12572065979161 | 0.90558635835334 | 1.39936626937043 |
| Homocarnosine | Postpartum Depression | rs75165826 | -0.291565859 | 0.138448580137975 | 0.0352086507375181 | -0.562925076 | -0.020206642 | 0.747092809095149 | 0.569540675078485 | 0.979996143953663 |
| Homocarnosine | Postpartum Depression | rs75493168 | -0.125681609 | 0.191809482758621 | 0.512312023753504 | -0.501628195 | 0.250264977011494 | 0.881895589534412 | 0.605543912807514 | 1.28436569898684 |
| Homocarnosine | Postpartum Depression | rs75965538 | -0.036863715 | 0.0760758101851852 | 0.627984570046312 | -0.185972303 | 0.112244872685185 | 0.96380747863331 | 0.830296591188271 | 1.11878678742987 |
| Homocarnosine | Postpartum Depression | rs76191754 | -0.09730505 | 0.178091537929444 | 0.584807089410671 | -0.446364464 | 0.251754364768273 | 0.907279198782859 | 0.63995049069157 | 1.28628004278036 |
| Homocarnosine | Postpartum Depression | rs76342337 | -0.076522391 | 0.0601016516260855 | 0.202941368319332 | -0.194321628 | 0.0412768465860718 | 0.926332172922488 | 0.823393035595453 | 1.04214057867365 |
| Homocarnosine | Postpartum Depression | rs7658226 | -0.07008371 | 0.118781674208145 | 0.555176411423227 | -0.302895792 | 0.162728371040724 | 0.932315772106328 | 0.738676068422551 | 1.17671701585572 |
| Homocarnosine | Postpartum Depression | rs77330157 | -0.041156387 | 0.165804744525547 | 0.803962638064176 | -0.366133686 | 0.283820912408759 | 0.959679037019356 | 0.693410095700015 | 1.32819504620082 |
| Homocarnosine | Postpartum Depression | rs7759210 | -0.397060354 | 0.287822580645161 | 0.167730900990111 | -0.961192612 | 0.167071904266389 | 0.672293448945091 | 0.38243651556765 | 1.1818392415369 |
| Homocarnosine | Postpartum Depression | rs77652393 | -0.000444527 | 0.0935327527451723 | 0.996207963085423 | -0.183768722 | 0.182879668686104 | 0.999555572092919 | 0.832128234464759 | 1.20066992119868 |
| Homocarnosine | Postpartum Depression | rs77661128 | 0.234505821474774 | 0.150255498059508 | 0.11859130609815 | -0.059994955 | 0.52900659767141 | 1.26428383241079 | 0.941769285060247 | 1.69724542332367 |
| Homocarnosine | Postpartum Depression | rs78489432 | 0.148477174849268 | 0.10926571920758 | 0.174189912934649 | -0.065683635 | 0.362637984496124 | 1.16006631878365 | 0.936427070374162 | 1.43711550696472 |
| Homocarnosine | Postpartum Depression | rs78727650 | -0.301815177 | 0.22515911872705 | 0.180098170584651 | -0.74312705 | 0.139496695226438 | 0.739474723843304 | 0.475624286649878 | 1.14969500623012 |
| Homocarnosine | Postpartum Depression | rs78850140 | -0.025416069 | 0.0551523577652486 | 0.644917874925776 | -0.13351469 | 0.0826825525371604 | 0.974904200525763 | 0.875014615003725 | 1.08619694334903 |
| Homocarnosine | Postpartum Depression | rs78898307 | -0.086816437 | 0.10544843831792 | 0.410333436554924 | -0.293495376 | 0.11986250218112 | 0.916845379147203 | 0.745652670735343 | 1.12734183387903 |
| Homocarnosine | Postpartum Depression | rs79446612 | 0.0425054815314556 | 0.0601544948557936 | 0.479811829032878 | -0.075397328 | 0.160408291448811 | 1.04342177590729 | 0.927374940728264 | 1.17399010327209 |
| Homocarnosine | Postpartum Depression | rs9642764 | -0.066488565 | 0.14496699923254 | 0.646488246625341 | -0.350623883 | 0.217646753645434 | 0.935673615362975 | 0.704248583669834 | 1.24314785260096 |
| Homocarnosine | Postpartum Depression | rs9958960 | -0.058396898 | 0.121015181518152 | 0.629409291502426 | -0.295586653 | 0.178792858085809 | 0.943275489268417 | 0.74409493352486 | 1.19577302379905 |
| Homocarnosine | Postpartum Depression | All - Inverse variance weighted | -0.024032709 | 0.0105106160915065 | 0.0222239927241333 | -0.044633517 | -0.003431902 | 0.976253776743804 | 0.956347903103676 | 0.996573980570771 |
| Homocarnosine | Postpartum Depression | All - MR Egger | -0.036504103 | 0.0175110160531224 | 0.0399673543709361 | -0.070825694 | -0.002182512 | 0.964154137960557 | 0.931624265239592 | 0.997819868407351 |
| N-acetyl-isoputreanine | Postpartum Depression | rs114523630 | 0.298128805620609 | 0.357459016393443 | 0.404268394645186 | -0.402490867 | 0.998748477751756 | 1.34733532106549 | 0.668652446028339 | 2.71488196621912 |
| N-acetyl-isoputreanine | Postpartum Depression | rs117748775 | 1.1769940915805 | 0.527248892171344 | 0.0255930888477209 | 0.143586262924668 | 2.21040192023634 | 3.24460653977803 | 1.15440638898346 | 9.11938092030188 |
| N-acetyl-isoputreanine | Postpartum Depression | rs12030162 | -0.336782025 | 0.219701446280992 | 0.125298614006079 | -0.76739686 | 0.0938328099173554 | 0.714064471290875 | 0.464219926508682 | 1.09837609297537 |
| N-acetyl-isoputreanine | Postpartum Depression | rs13034969 | 0.260545228215768 | 0.441941908713693 | 0.555494845796685 | -0.605660913 | 1.12675136929461 | 1.29763740234961 | 0.545713638264921 | 3.08561617285292 |
| N-acetyl-isoputreanine | Postpartum Depression | rs1986624 | 0.00746685302073941 | 0.378142470694319 | 0.984245885963199 | -0.73369239 | 0.748626095581605 | 1.00749479948183 | 0.480132875447389 | 2.11409345806013 |
| N-acetyl-isoputreanine | Postpartum Depression | rs2049746 | 0.0269023489932886 | 0.356441275167785 | 0.939836913456251 | -0.67172255 | 0.725527248322148 | 1.02726748416147 | 0.510827892734091 | 2.06582001301319 |
| N-acetyl-isoputreanine | Postpartum Depression | rs2052277 | -0.067290822 | 0.812932061978546 | 0.934030085138398 | -1.660637664 | 1.52605601907032 | 0.934923265161205 | 0.190017773989156 | 4.59999869164644 |
| N-acetyl-isoputreanine | Postpartum Depression | rs2105374 | 1.11270792079208 | 0.358111386138614 | 0.00188896726528985 | 0.410809603960396 | 1.81460623762376 | 3.04258633189621 | 1.50803820472089 | 6.13865852871744 |
| N-acetyl-isoputreanine | Postpartum Depression | rs2862246 | -0.061804785 | 0.327650717703349 | 0.850382746981007 | -0.704000191 | 0.580390622009569 | 0.940066384231314 | 0.494602835306218 | 1.78673623295064 |
| N-acetyl-isoputreanine | Postpartum Depression | rs34196162 | 1.24422489959839 | 0.396451807228916 | 0.00169872086208084 | 0.467179357429719 | 2.02127044176707 | 3.47024396914561 | 1.59548754030022 | 7.54790802260066 |
| N-acetyl-isoputreanine | Postpartum Depression | rs35225704 | 0.435678824721378 | 0.339991894630193 | 0.200039563307074 | -0.230705289 | 1.10206293819656 | 1.54601217411174 | 0.793973424455832 | 3.01036982961973 |
| N-acetyl-isoputreanine | Postpartum Depression | rs35243932 | 0.299220207253886 | 0.377987046632124 | 0.428585211318314 | -0.441634404 | 1.04007481865285 | 1.34880660777178 | 0.642984665018306 | 2.82942870047613 |
| N-acetyl-isoputreanine | Postpartum Depression | rs3756528 | -0.317870229 | 0.338559796437659 | 0.347787494348971 | -0.98144743 | 0.345706972010178 | 0.727697216277363 | 0.374768255256872 | 1.41298850996562 |
| N-acetyl-isoputreanine | Postpartum Depression | rs4872177 | -0.196216269 | 0.302310195227766 | 0.516302131477733 | -0.788744252 | 0.396311713665944 | 0.821834478152557 | 0.454415068130334 | 1.48633255551853 |
| N-acetyl-isoputreanine | Postpartum Depression | rs4957362 | -0.045955897 | 0.340212820512821 | 0.892548739955545 | -0.712773026 | 0.620861230769231 | 0.955084082918882 | 0.490282744040194 | 1.86052969747232 |
| N-acetyl-isoputreanine | Postpartum Depression | rs57970893 | 0.369767068273092 | 0.367220883534137 | 0.313966655216167 | -0.349985863 | 1.08952 | 1.44739743061138 | 0.704698051644853 | 2.97284676358979 |
| N-acetyl-isoputreanine | Postpartum Depression | rs73696815 | 0.266069736842105 | 0.414328947368421 | 0.520762626574977 | -0.546015 | 1.07815447368421 | 1.30482604996239 | 0.579253542512478 | 2.93925007912019 |
| N-acetyl-isoputreanine | Postpartum Depression | rs750145 | 0.324022088353414 | 0.324050200803213 | 0.317352493239835 | -0.311116305 | 0.959160481927711 | 1.38267784785914 | 0.732628662375638 | 2.6095048271264 |
| N-acetyl-isoputreanine | Postpartum Depression | rs75544106 | 0.278926151172893 | 0.557600347523892 | 0.616916003759997 | -0.81397053 | 1.37182283231972 | 1.32170973355178 | 0.443095245918206 | 3.94253072191164 |
| N-acetyl-isoputreanine | Postpartum Depression | rs76467997 | 0.606620996441281 | 0.396927046263345 | 0.126439700755508 | -0.171356014 | 1.38459800711744 | 1.83422306942612 | 0.842521570399855 | 3.99322033597107 |
| N-acetyl-isoputreanine | Postpartum Depression | rs78795463 | 0.229545799457995 | 0.302557181571816 | 0.448040608243523 | -0.363466276 | 0.822557875338753 | 1.25802848292656 | 0.69526217354842 | 2.27631492703995 |
| N-acetyl-isoputreanine | Postpartum Depression | rs78877920 | 0.112604166666667 | 0.696313131313131 | 0.871530417685552 | -1.252169571 | 1.4773779040404 | 1.11918883301111 | 0.285883878252456 | 4.38144204420876 |
| N-acetyl-isoputreanine | Postpartum Depression | All - Inverse variance weighted | 0.195416710080421 | 0.0938555665232767 | 0.0373333024763355 | 0.0114597996947986 | 0.379373620466043 | 1.21581752436104 | 1.01152571474979 | 1.46136893109934 |
| N-acetyl-isoputreanine | Postpartum Depression | All - MR Egger | 0.159042650562429 | 0.241575069224443 | 0.517816350807267 | -0.314444485 | 0.632529786242337 | 1.1723879486198 | 0.730194395475916 | 1.88236654592931 |
| Glucose | Postpartum Depression | rs10282526 | 0.265431906614786 | 0.632175097276265 | 0.674579790692029 | -0.973631284 | 1.50449509727626 | 1.3039940578294 | 0.377708976229134 | 4.50188004487046 |
| Glucose | Postpartum Depression | rs11089873 | -0.317211009 | 0.71026376146789 | 0.655156561570737 | -1.709327982 | 1.07490596330275 | 0.728177086867713 | 0.180987378597828 | 2.92971738663279 |
| Glucose | Postpartum Depression | rs112910828 | 0.120288438617402 | 0.445810488676996 | 0.787298989968209 | -0.753500119 | 0.994076996424315 | 1.12782211211897 | 0.47071610357463 | 2.7022290228123 |
| Glucose | Postpartum Depression | rs113644051 | 0.853695396669931 | 0.793267384916748 | 0.281848508620357 | -0.701108678 | 2.40849947110676 | 2.34830876986554 | 0.496035055785956 | 11.1172668429446 |
| Glucose | Postpartum Depression | rs115411818 | -0.49563324 | 0.560013927576602 | 0.376136489110269 | -1.593260539 | 0.601994057567316 | 0.609185024511853 | 0.203261787220099 | 1.82575583519621 |
| Glucose | Postpartum Depression | rs116551591 | 0.809529200359389 | 0.669309973045822 | 0.226471506376413 | -0.502318347 | 2.1213767475292 | 2.24684992149212 | 0.605126140003236 | 8.34261525982356 |
| Glucose | Postpartum Depression | rs117083731 | 0.697134213421342 | 0.550214521452145 | 0.205147222085983 | -0.381286249 | 1.77555467546755 | 2.00798998330144 | 0.682982358874998 | 5.90355478533943 |
| Glucose | Postpartum Depression | rs117767939 | -0.577217652 | 0.342497000856898 | 0.0919265075299499 | -1.248511774 | 0.0940764695801201 | 0.561458367836906 | 0.286931498246683 | 1.09864375553173 |
| Glucose | Postpartum Depression | rs118043772 | -0.616810016 | 0.404722575516693 | 0.127500804263394 | -1.410066264 | 0.176446232114467 | 0.539663211771855 | 0.244127105800652 | 1.19297028154559 |
| Glucose | Postpartum Depression | rs12820617 | 0.480022267206478 | 0.693815789473684 | 0.489026270805641 | -0.87985668 | 1.8399012145749 | 1.61611038805594 | 0.414842362561456 | 6.29591628553944 |
| Glucose | Postpartum Depression | rs12966148 | -0.246992683 | 0.592357723577236 | 0.676703706230982 | -1.408013821 | 0.914028455284553 | 0.781146409215899 | 0.244628677261874 | 2.49435070107373 |
| Glucose | Postpartum Depression | rs142337898 | 0.563426430517711 | 0.851536784741144 | 0.50819019809442 | -1.105585668 | 2.23243852861035 | 1.75668134654585 | 0.331016959560444 | 9.32257174194318 |
| Glucose | Postpartum Depression | rs145189837 | 0.607524453694069 | 0.500944849115505 | 0.22522267788139 | -0.374327451 | 1.58937635796046 | 1.83588096036545 | 0.687751670275208 | 4.9006916977514 |
| Glucose | Postpartum Depression | rs147281586 | -0.65967003 | 1.08556004036327 | 0.543401621613343 | -2.787367709 | 1.46802764883956 | 0.517021907926211 | 0.0615831053791964 | 4.34066537615625 |
| Glucose | Postpartum Depression | rs148251390 | 3.3063987391647 | 2.08599684791174 | 0.112956125084123 | -0.782155083 | 7.39495256107171 | 27.2866818590287 | 0.457419172163226 | 1627.74770317269 |
| Glucose | Postpartum Depression | rs148671651 | -0.014880616 | 1.6451081530782 | 0.992782935548173 | -3.239292596 | 3.20953136439268 | 0.985229553581406 | 0.0391916096093344 | 24.7674765830242 |
| Glucose | Postpartum Depression | rs149281462 | -0.272932813 | 0.69050625 | 0.692647476772535 | -1.626325063 | 1.080459438 | 0.761143925268489 | 0.196650927719078 | 2.94603275810999 |
| Glucose | Postpartum Depression | rs1501691 | 0.190863342898135 | 0.100533715925395 | 0.0576301388437709 | -0.00618274 | 0.387909426111908 | 1.2102940455029 | 0.993836333493552 | 1.47389628172543 |
| Glucose | Postpartum Depression | rs168518 | 0.452163522012579 | 0.522575471698113 | 0.386896237258676 | -0.572084403 | 1.47641144654088 | 1.57170893657398 | 0.564347883728026 | 4.37720961224865 |
| Glucose | Postpartum Depression | rs17243220 | 2.75726574500768 | 1.32165284178187 | 0.036958209335667 | 0.166826175115208 | 5.34770531490015 | 15.7567011560095 | 1.18154886486171 | 210.125572207164 |
| Glucose | Postpartum Depression | rs17388160 | 1.0148132780083 | 0.601701244813278 | 0.0916854219140526 | -0.164521162 | 2.19414771784232 | 2.75884821164665 | 0.848299805181753 | 8.97235082268484 |
| Glucose | Postpartum Depression | rs17539289 | 1.0690626118068 | 0.555033989266547 | 0.0540892694413827 | -0.018804007 | 2.15692923076923 | 2.91264793812195 | 0.981371685223192 | 8.64455143671344 |
| Glucose | Postpartum Depression | rs17599587 | -0.681071823 | 0.660721915285451 | 0.302634850460806 | -1.976086777 | 0.613943130755064 | 0.506074279415541 | 0.138610591532324 | 1.84770278702861 |
| Glucose | Postpartum Depression | rs185509930 | 0.393882838283828 | 0.667901815181518 | 0.555370573897835 | -0.915204719 | 1.7029703960396 | 1.48272681967895 | 0.400434640930885 | 5.49023135631943 |
| Glucose | Postpartum Depression | rs186822399 | -0.157567839 | 0.420386934673367 | 0.707797155014337 | -0.981526231 | 0.666390552763819 | 0.854218862122013 | 0.374738724258298 | 1.9471963188466 |
| Glucose | Postpartum Depression | rs2051534 | -0.2273 | 0.665764912280702 | 0.732793589779156 | -1.532199228 | 1.07759922807018 | 0.796681741913302 | 0.216059979263237 | 2.93761852640337 |
| Glucose | Postpartum Depression | rs2312262 | 0.496257510729614 | 0.578081545064378 | 0.390640774035308 | -0.636782318 | 1.62929733905579 | 1.64256248082564 | 0.52899181618323 | 5.10028968478699 |
| Glucose | Postpartum Depression | rs2586445 | -1.132577075 | 0.566067193675889 | 0.0454158836134871 | -2.242068775 | -0.023085375 | 0.322201847223148 | 0.106238493373484 | 0.977179053067407 |
| Glucose | Postpartum Depression | rs467053 | 0.530589285714286 | 0.611598214285714 | 0.385643186606254 | -0.668143214 | 1.72932178571429 | 1.69993376019913 | 0.512659593606717 | 5.63682963335244 |
| Glucose | Postpartum Depression | rs4885016 | 0.197452158273381 | 0.695223021582734 | 0.776400658173456 | -1.165184964 | 1.56008928057554 | 1.21829477824966 | 0.311864972895782 | 4.75924613440441 |
| Glucose | Postpartum Depression | rs62293004 | -0.573296296 | 0.612643097643098 | 0.349388876372075 | -1.774076768 | 0.627484175084175 | 0.563664368295363 | 0.169639994350815 | 1.87289277685763 |
| Glucose | Postpartum Depression | rs6920581 | -0.400361441 | 0.586669491525424 | 0.49496646691842 | -1.550233644 | 0.749510762711864 | 0.670077808883563 | 0.212198389139566 | 2.11596455457954 |
| Glucose | Postpartum Depression | rs72743290 | 0.320742465753425 | 0.555238356164384 | 0.563489461216831 | -0.767524712 | 1.40900964383562 | 1.37815061420758 | 0.464160578473813 | 4.09190095739223 |
| Glucose | Postpartum Depression | rs72829318 | -0.032652 | 0.298213333333333 | 0.912812198327819 | -0.617150133 | 0.551846133333333 | 0.96787532160096 | 0.539479694115006 | 1.73645578950087 |
| Glucose | Postpartum Depression | rs72916513 | -0.274388652 | 0.485270921985816 | 0.571778640504165 | -1.22551966 | 0.676742354609929 | 0.76003662772941 | 0.293605085979173 | 1.96745800081702 |
| Glucose | Postpartum Depression | rs73118076 | 0.524710997442455 | 0.500017902813299 | 0.294001225448331 | -0.455324092 | 1.50474608695652 | 1.68997037203734 | 0.634242381708201 | 4.50301011211516 |
| Glucose | Postpartum Depression | rs73180152 | 0.384882521489971 | 0.614325931232092 | 0.53097921790722 | -0.819196304 | 1.58896134670487 | 1.46944168348117 | 0.440785770067767 | 4.898658278 |
| Glucose | Postpartum Depression | rs74942200 | -1.991727575 | 1.73327796234773 | 0.250510498074377 | -5.388952381 | 1.40549723145072 | 0.136459477747296 | 0.00456675505016657 | 4.07755372523986 |
| Glucose | Postpartum Depression | rs76044941 | 1.23886162904809 | 0.678708537782139 | 0.0679524513941943 | -0.091407105 | 2.56913036310108 | 3.45168193296871 | 0.912646092468584 | 13.0544668570887 |
| Glucose | Postpartum Depression | rs76401846 | 0.402324110671937 | 0.638748023715415 | 0.528783849444224 | -0.849622016 | 1.65427023715415 | 1.49529589550324 | 0.427576518572125 | 5.22926240799093 |
| Glucose | Postpartum Depression | rs77221276 | 0.216175292153589 | 0.243999165275459 | 0.37563512518817 | -0.262063072 | 0.694413656093489 | 1.24131995357851 | 0.76946249080327 | 2.0025345557047 |
| Glucose | Postpartum Depression | rs7855540 | 0.521313868613139 | 0.557624087591241 | 0.349848054821598 | -0.571629343 | 1.61425708029197 | 1.68423906547102 | 0.564604754006812 | 5.02415399361742 |
| Glucose | Postpartum Depression | rs78717230 | -0.096062399 | 0.815137254901961 | 0.906187995048121 | -1.693731419 | 1.50160662053057 | 0.908407330520945 | 0.183832287374566 | 4.48889523124304 |
| Glucose | Postpartum Depression | rs80287632 | -0.260564329 | 0.68355487804878 | 0.703062219645051 | -1.60033189 | 1.07920323170732 | 0.770616581580686 | 0.20182952162839 | 2.94233425821868 |
| Glucose | Postpartum Depression | rs881997 | 0.629904 | 0.580552 | 0.277917779752789 | -0.50797792 | 1.76778592 | 1.87743033730049 | 0.601711057395583 | 5.8578692016606 |
| Glucose | Postpartum Depression | All - Inverse variance weighted | 0.141644027190202 | 0.0651089268545817 | 0.0295931776462242 | 0.0140305305552221 | 0.269257523825182 | 1.15216643560557 | 1.01412942040013 | 1.30899219432199 |
| Glucose | Postpartum Depression | All - MR Egger | 0.147956308178212 | 0.0939462325763476 | 0.122608323856199 | -0.036178308 | 0.332090924027853 | 1.15946223623887 | 0.96446830605242 | 1.39387957989671 |
| Benzoate | Postpartum Depression | rs1075149 | 0.246313280363224 | 0.205769580022701 | 0.231293119243284 | -0.156995096 | 0.649621657207718 | 1.27930029042975 | 0.85470824988532 | 1.91481623502902 |
| Benzoate | Postpartum Depression | rs10997236 | 0.247593949044586 | 0.0889527600849257 | 0.00537871544202321 | 0.0732465392781316 | 0.42194135881104 | 1.28093969979181 | 1.07599577943975 | 1.52491909899226 |
| Benzoate | Postpartum Depression | rs11046740 | -0.162167076 | 0.215788697788698 | 0.452346588037744 | -0.585112924 | 0.260778771498771 | 0.850299127952591 | 0.557042954834829 | 1.29794049223963 |
| Benzoate | Postpartum Depression | rs111560867 | -0.018653481 | 0.148023422251139 | 0.899718397182314 | -0.308779388 | 0.271472426805465 | 0.981519418638459 | 0.734342756674088 | 1.31189469823005 |
| Benzoate | Postpartum Depression | rs111852815 | -0.248280943 | 0.359282907662083 | 0.4895367617633 | -0.952475442 | 0.455913555992141 | 0.780140737388184 | 0.385784852426455 | 1.57761396359803 |
| Benzoate | Postpartum Depression | rs111865472 | 0.367233688415446 | 0.336334886817577 | 0.274890617411938 | -0.29198269 | 1.0264500665779 | 1.443735264 | 0.746781462837528 | 2.79113986616264 |
| Benzoate | Postpartum Depression | rs112167000 | -0.042151421 | 0.141943410852713 | 0.766497553801671 | -0.320360506 | 0.236057664082687 | 0.958724598362677 | 0.725887302836217 | 1.26624732505215 |
| Benzoate | Postpartum Depression | rs113746308 | 0.070282076884673 | 0.303577134298552 | 0.816916226327362 | -0.524729106 | 0.665293260109835 | 1.07281075369311 | 0.591715634671396 | 1.94506084646341 |
| Benzoate | Postpartum Depression | rs114019085 | -0.012597021 | 0.136891977760127 | 0.926680862849903 | -0.280905298 | 0.255711254964257 | 0.987481988916007 | 0.755099841668622 | 1.29137979459602 |
| Benzoate | Postpartum Depression | rs114511014 | 0.0928026256224536 | 0.150971027614305 | 0.538749644307063 | -0.203100589 | 0.388705839746492 | 1.09724514581651 | 0.816196137349861 | 1.47507058037182 |
| Benzoate | Postpartum Depression | rs114722875 | 0.104051671732523 | 0.105943389057751 | 0.326028875014335 | -0.103597371 | 0.311700714285714 | 1.10965779137482 | 0.901588230081835 | 1.36574588362481 |
| Benzoate | Postpartum Depression | rs115594835 | 0.124963120191032 | 0.265908729105864 | 0.638392586552183 | -0.396217989 | 0.646144229238525 | 1.13310666353894 | 0.672860003966537 | 1.90816916355191 |
| Benzoate | Postpartum Depression | rs116958828 | -0.165989771 | 0.205028880866426 | 0.418174624390204 | -0.567846378 | 0.235866835138388 | 0.847054898364867 | 0.566744679226636 | 1.26600571146605 |
| Benzoate | Postpartum Depression | rs117550208 | 0.0729534012897857 | 0.116750780112336 | 0.532060086528592 | -0.155878128 | 0.301784930309965 | 1.07568041042707 | 0.855663465665336 | 1.3522703630648 |
| Benzoate | Postpartum Depression | rs11854205 | 0.267048280907096 | 0.19128090709583 | 0.162682799508068 | -0.107862297 | 0.641958858814923 | 1.30610350467035 | 0.897751210953539 | 1.90019945848946 |
| Benzoate | Postpartum Depression | rs12090448 | -0.121401214 | 0.186327714093055 | 0.51469361878019 | -0.486603533 | 0.243801105866487 | 0.885678541884097 | 0.614710696912459 | 1.27609049833348 |
| Benzoate | Postpartum Depression | rs12153318 | 0.346009661835749 | 0.169443236714976 | 0.0411476838705438 | 0.0139009178743962 | 0.678118405797101 | 1.41341627194757 | 1.01399798488528 | 1.9701671872969 |
| Benzoate | Postpartum Depression | rs140449099 | 0.0245496362356254 | 0.0945327387937104 | 0.795099403657042 | -0.160734532 | 0.209833804271298 | 1.02485345971253 | 0.851518092080265 | 1.23347304496936 |
| Benzoate | Postpartum Depression | rs1420934 | -0.098682421 | 0.187728421052632 | 0.599120391417365 | -0.466630126 | 0.269265284210526 | 0.906030398519154 | 0.627111999746912 | 1.30900235264525 |
| Benzoate | Postpartum Depression | rs148379904 | -0.129254265 | 0.198369810106212 | 0.514670644913837 | -0.518059092 | 0.259550563244287 | 0.878750502024196 | 0.595675577977396 | 1.29634732958127 |
| Benzoate | Postpartum Depression | rs149152722 | 0.125478496566679 | 0.199718106252259 | 0.529821827198637 | -0.265968992 | 0.516925984821106 | 1.1336907904541 | 0.766462893853282 | 1.67686501025379 |
| Benzoate | Postpartum Depression | rs149690291 | 0.128910275841164 | 0.106940284934829 | 0.228032842553883 | -0.080692683 | 0.338513234313428 | 1.13758805045563 | 0.922477141135755 | 1.40286031472405 |
| Benzoate | Postpartum Depression | rs150639456 | -0.034178473 | 0.19654974271012 | 0.861950157770104 | -0.419415969 | 0.351059022298456 | 0.966399012714868 | 0.657430667522554 | 1.42057116881337 |
| Benzoate | Postpartum Depression | rs16870106 | -0.221530752 | 0.19271298405467 | 0.250334520328485 | -0.5992482 | 0.156186697038724 | 0.801291280693223 | 0.549224387565757 | 1.16904443985221 |
| Benzoate | Postpartum Depression | rs17269205 | -0.041030243 | 0.29823178807947 | 0.890573652406988 | -0.625564547 | 0.543504061810155 | 0.959800102441748 | 0.534959333319914 | 1.72203040356395 |
| Benzoate | Postpartum Depression | rs184127682 | 0.268042176870748 | 0.272483900226757 | 0.325263465411406 | -0.266026268 | 0.802110621315193 | 1.30740228098911 | 0.766418995269167 | 2.23024316318677 |
| Benzoate | Postpartum Depression | rs187099623 | -8.05E-05 | 0.122753159224937 | 0.999476727116698 | -0.240676697 | 0.240515687447346 | 0.999919498606881 | 0.786095732642593 | 1.27190488661363 |
| Benzoate | Postpartum Depression | rs187147316 | 0.0166495221915481 | 0.0778594181354852 | 0.830671187655993 | -0.135954937 | 0.169253981737099 | 1.01678889792486 | 0.872881965973507 | 1.18442092200888 |
| Benzoate | Postpartum Depression | rs205163 | -0.2061678 | 0.159977324263039 | 0.197491483538005 | -0.519723356 | 0.107387755102041 | 0.81369652618054 | 0.594685041259265 | 1.11336588409262 |
| Benzoate | Postpartum Depression | rs2256262 | 0.420553284671533 | 0.195652554744526 | 0.0315955476846071 | 0.0370742773722628 | 0.804032291970803 | 1.52280386661541 | 1.03777010081157 | 2.23453307660855 |
| Benzoate | Postpartum Depression | rs2390235 | -0.007979368 | 0.205138528138528 | 0.968972140604852 | -0.410050883 | 0.394092147186147 | 0.99205238268503 | 0.663616482402183 | 1.48303720008357 |
| Benzoate | Postpartum Depression | rs2611246 | 0.227324022346369 | 0.188104748603352 | 0.226856153185875 | -0.141361285 | 0.596009329608939 | 1.25523652673809 | 0.868175596283206 | 1.81486181459486 |
| Benzoate | Postpartum Depression | rs266638 | -0.059405809 | 0.175332780082988 | 0.734747239005532 | -0.403058058 | 0.284246439834025 | 0.942324287757025 | 0.668273299525022 | 1.32876034988666 |
| Benzoate | Postpartum Depression | rs28634129 | -0.082464603 | 0.12632638676065 | 0.513891665646147 | -0.330064321 | 0.165135114924916 | 0.920844032280154 | 0.718877492898479 | 1.17955248309008 |
| Benzoate | Postpartum Depression | rs35247600 | 0.153582191780822 | 0.15565296803653 | 0.323791594453024 | -0.151497626 | 0.45866200913242 | 1.16600361909766 | 0.859419922902285 | 1.58195592575693 |
| Benzoate | Postpartum Depression | rs35835286 | -0.319533687 | 0.250089326267979 | 0.201362905887649 | -0.809708766 | 0.170641392884179 | 0.726487729061475 | 0.444987642846247 | 1.18606534127794 |
| Benzoate | Postpartum Depression | rs35958750 | 0.259794087665647 | 0.190529051987768 | 0.172712214910364 | -0.113642854 | 0.633231029561672 | 1.29666306025709 | 0.892576678948674 | 1.88368700582191 |
| Benzoate | Postpartum Depression | rs4546775 | -0.156748404 | 0.187886334610473 | 0.404127440239776 | -0.525005619 | 0.211508812260536 | 0.854919126356448 | 0.591552040182537 | 1.23554085348863 |
| Benzoate | Postpartum Depression | rs519991 | 0.0627371508379888 | 0.186223463687151 | 0.736198495542231 | -0.302260838 | 0.427735139664804 | 1.06474693460705 | 0.739145242584407 | 1.53377978973551 |
| Benzoate | Postpartum Depression | rs55642214 | 0.0930263876251137 | 0.155542311191993 | 0.549788089560849 | -0.211836542 | 0.397889317561419 | 1.09749069505902 | 0.809096939874008 | 1.48867925013866 |
| Benzoate | Postpartum Depression | rs55645484 | 0.125381477832512 | 0.13279842364532 | 0.345093593630164 | -0.134903433 | 0.38566638817734 | 1.13358080654401 | 0.87380028831253 | 1.47059398143087 |
| Benzoate | Postpartum Depression | rs55688553 | -0.146045921 | 0.185970688812897 | 0.432267802065946 | -0.510548471 | 0.218456629213483 | 0.864118021231036 | 0.600166314745988 | 1.2441550554737 |
| Benzoate | Postpartum Depression | rs557421 | 0.0836156862745098 | 0.175325490196078 | 0.633421309389339 | -0.260022275 | 0.427253647058824 | 1.08721098340619 | 0.771034411198738 | 1.53304146387104 |
| Benzoate | Postpartum Depression | rs56341809 | -0.004792814 | 0.182847067039106 | 0.979088127106265 | -0.363173066 | 0.353587437150838 | 0.995218652961009 | 0.695466061802499 | 1.42416750665656 |
| Benzoate | Postpartum Depression | rs59778363 | -0.075328086 | 0.147217884130982 | 0.608876703646196 | -0.363875139 | 0.213218967254408 | 0.927439156936717 | 0.694977965289728 | 1.23765562762973 |
| Benzoate | Postpartum Depression | rs59829944 | -0.052542118 | 0.144561305732484 | 0.716261982248496 | -0.335882277 | 0.230798041401274 | 0.948814358208222 | 0.714707238293938 | 1.25960482573402 |
| Benzoate | Postpartum Depression | rs59841864 | 0.382427207637231 | 0.159355608591885 | 0.0164024520660067 | 0.070090214797136 | 0.694764200477327 | 1.4658381686502 | 1.07260494172676 | 2.00323665599812 |
| Benzoate | Postpartum Depression | rs61253998 | -0.059685538 | 0.187830705962988 | 0.750665165413703 | -0.427833722 | 0.308462645647704 | 0.942060729274268 | 0.651919805886261 | 1.36133065697287 |
| Benzoate | Postpartum Depression | rs61940895 | 0.0370502228826152 | 0.16108519068846 | 0.818088735373741 | -0.278676751 | 0.352777196631996 | 1.03774513808166 | 0.756784493612706 | 1.42301405578647 |
| Benzoate | Postpartum Depression | rs62173318 | 0.0644326145552561 | 0.285605570530099 | 0.821512546722814 | -0.495354304 | 0.62421953279425 | 1.06655370562729 | 0.60935497233389 | 1.86678842158362 |
| Benzoate | Postpartum Depression | rs62502119 | -0.152541284 | 0.238996448653448 | 0.523306049351833 | -0.620974324 | 0.315891754957088 | 0.858523449596097 | 0.537420560799433 | 1.37148179148556 |
| Benzoate | Postpartum Depression | rs62583467 | 0.226905116909522 | 0.16682921043714 | 0.173796938697105 | -0.100080136 | 0.553890369366317 | 1.2547108114527 | 0.904764911299495 | 1.74000914570742 |
| Benzoate | Postpartum Depression | rs6426029 | 0.0809646624472574 | 0.15579746835443 | 0.603287371191946 | -0.224398376 | 0.386327700421941 | 1.08433257823005 | 0.798996770199588 | 1.47156682487881 |
| Benzoate | Postpartum Depression | rs711254 | 0.227635241301908 | 0.167496071829405 | 0.174131303525466 | -0.100657059 | 0.555927542087542 | 1.25562724093458 | 0.904243081307883 | 1.74355745790901 |
| Benzoate | Postpartum Depression | rs72648992 | 0.00565896885069817 | 0.430723236663086 | 0.98951745901641 | -0.838558575 | 0.849876512710347 | 1.00567501106144 | 0.432333250465786 | 2.33935795311554 |
| Benzoate | Postpartum Depression | rs72712515 | 0.112740069084629 | 0.193887305699482 | 0.560922280936413 | -0.26727905 | 0.492759188255613 | 1.11934094381555 | 0.765459440136968 | 1.63682630692711 |
| Benzoate | Postpartum Depression | rs72945230 | 0.168392963625522 | 0.103386851520572 | 0.103362616031857 | -0.034245265 | 0.371031192605844 | 1.18340155305384 | 0.966334467204205 | 1.44922827788807 |
| Benzoate | Postpartum Depression | rs73149720 | 0.495170142700329 | 0.41635565312843 | 0.23432318061358 | -0.320886937 | 1.31122722283205 | 1.64077738160368 | 0.725505273842994 | 3.71072480524082 |
| Benzoate | Postpartum Depression | rs73185704 | 0.0743352272727273 | 0.21189678030303 | 0.725731893795397 | -0.340982462 | 0.489652916666667 | 1.07716784101598 | 0.711071378780706 | 1.63174976850932 |
| Benzoate | Postpartum Depression | rs73199884 | 0.00701363034847816 | 0.355171151301279 | 0.984245050106021 | -0.689121826 | 0.703149086898985 | 1.00703828345604 | 0.502016733489254 | 2.02010418516814 |
| Benzoate | Postpartum Depression | rs73439374 | 0.110175 | 0.3943955 | 0.779975037810285 | -0.66284018 | 0.88319018 | 1.11647343621521 | 0.51538546631862 | 2.41860319166155 |
| Benzoate | Postpartum Depression | rs73851446 | 0.122424983329629 | 0.0879586574794399 | 0.163968769189243 | -0.049973985 | 0.294823951989331 | 1.13023433047752 | 0.951254170742098 | 1.34288992477522 |
| Benzoate | Postpartum Depression | rs74792748 | 0.336367465975373 | 0.205545690213869 | 0.101743182030246 | -0.066502087 | 0.739237018794556 | 1.39985332877938 | 0.935660963276003 | 2.09433696499814 |
| Benzoate | Postpartum Depression | rs75024337 | -0.1007953 | 0.149580156657963 | 0.500403657718991 | -0.393972407 | 0.192381806788512 | 0.904118086681268 | 0.674372663739107 | 1.21213322932146 |
| Benzoate | Postpartum Depression | rs75116337 | 0.243073419709462 | 0.240812328229289 | 0.31278790371383 | -0.228918744 | 0.715065583038869 | 1.27516224272307 | 0.79539316164837 | 2.04432075062945 |
| Benzoate | Postpartum Depression | rs76146397 | -0.060133422 | 0.190158096926714 | 0.751829028153338 | -0.432843292 | 0.312576447990544 | 0.94163888987201 | 0.648662134410956 | 1.366942437 |
| Benzoate | Postpartum Depression | rs76290191 | -0.036774127 | 0.256013692162417 | 0.885783766311827 | -0.538560963 | 0.465012710103872 | 0.963893828802059 | 0.58358745224508 | 1.5920344236814 |
| Benzoate | Postpartum Depression | rs76484490 | 0.253271508379888 | 0.154930726256983 | 0.102103491749417 | -0.050392715 | 0.556935731843575 | 1.28823299541022 | 0.950855935699702 | 1.74531618109151 |
| Benzoate | Postpartum Depression | rs76648121 | 0.129896704377767 | 0.137135759960649 | 0.343530513194539 | -0.138889385 | 0.398682793900639 | 1.13871075341358 | 0.870324293929442 | 1.48986095066404 |
| Benzoate | Postpartum Depression | rs76818916 | -0.040271525 | 0.158446004842615 | 0.799367617848767 | -0.350825695 | 0.270282644067797 | 0.960528595807146 | 0.704106472498427 | 1.3103347567442 |
| Benzoate | Postpartum Depression | rs77570815 | -0.006950686 | 0.157291380625477 | 0.964753052494881 | -0.315241793 | 0.301340419527079 | 0.993073413652687 | 0.729612438105916 | 1.35166939788469 |
| Benzoate | Postpartum Depression | rs77640146 | 0.139230377166157 | 0.377859327217125 | 0.712521723687408 | -0.601373904 | 0.879834658511723 | 1.14938886245377 | 0.548058139228261 | 2.4105011176242 |
| Benzoate | Postpartum Depression | rs77685103 | 0.218096146508966 | 0.235532239603205 | 0.354460779807225 | -0.243547043 | 0.679739336131248 | 1.24370663992235 | 0.783842600768627 | 1.9733632806767 |
| Benzoate | Postpartum Depression | rs7828056 | -0.002888181 | 0.225306043956044 | 0.989772257630517 | -0.444488027 | 0.438711664835165 | 0.997115985464543 | 0.641152444456025 | 1.55070809924537 |
| Benzoate | Postpartum Depression | rs78361177 | 0.10992008757526 | 0.241302134646962 | 0.648728806079514 | -0.363032096 | 0.582872271483306 | 1.11618886953576 | 0.695564108083728 | 1.79117579241961 |
| Benzoate | Postpartum Depression | rs78663066 | 0.247786469344609 | 0.212758985200846 | 0.244166944029639 | -0.169221142 | 0.664794080338266 | 1.28118633042706 | 0.844322167942756 | 1.94409015372963 |
| Benzoate | Postpartum Depression | rs79089076 | 0.16474890569041 | 0.20833306804616 | 0.429063187895754 | -0.243583908 | 0.573081719060883 | 1.1790970169868 | 0.783813705283364 | 1.7737247589522 |
| Benzoate | Postpartum Depression | rs8117270 | 0.137039529202754 | 0.102964023984011 | 0.183206865014657 | -0.064769958 | 0.338849016211415 | 1.14687348261881 | 0.937283053229122 | 1.40333144891788 |
| Benzoate | Postpartum Depression | rs9539551 | 0.168581331503089 | 0.221986959505834 | 0.447601367505349 | -0.266513109 | 0.603675772134523 | 1.18362448888901 | 0.766045961465544 | 1.82882881859666 |
| Benzoate | Postpartum Depression | All - Inverse variance weighted | 0.0709921735994549 | 0.0183220997143401 | 0.000106767288796692 | 0.0350808581593483 | 0.106903489039562 | 1.07357282362455 | 1.03570345048862 | 1.11282684930849 |
| Benzoate | Postpartum Depression | All - MR Egger | 0.068952423339243 | 0.0319880551771618 | 0.0342412246776648 | 0.006255835192006 | 0.13164901148648 | 1.0713852350039 | 1.00627544379706 | 1.14070787363451 |
| Gluconate | Postpartum Depression | rs1113204 | 0.207261128636523 | 0.196813880126183 | 0.292303472017829 | -0.178494076 | 0.593016333683842 | 1.23030379739145 | 0.836529012116941 | 1.80943806126382 |
| Gluconate | Postpartum Depression | rs114949677 | 0.153137147048038 | 0.142237623762376 | 0.281646054367727 | -0.125648596 | 0.431922889622296 | 1.16548481078359 | 0.881924704624254 | 1.54021634391791 |
| Gluconate | Postpartum Depression | rs116618980 | -0.134827231 | 0.209769260106789 | 0.520392397892653 | -0.545974981 | 0.276320518688024 | 0.873866875646977 | 0.579276724164054 | 1.31827032659565 |
| Gluconate | Postpartum Depression | rs117394010 | -0.145186751 | 0.21768832807571 | 0.504805479036813 | -0.571855874 | 0.281482372239748 | 0.864860764598567 | 0.564476868153262 | 1.32509263770031 |
| Gluconate | Postpartum Depression | rs11751686 | 0.395342776203966 | 0.240577094293808 | 0.100318783373006 | -0.076188329 | 0.86687388101983 | 1.48489308971332 | 0.926641676984688 | 2.37946073724332 |
| Gluconate | Postpartum Depression | rs117796720 | 0.347716621253406 | 0.22248038147139 | 0.118073967978369 | -0.088344926 | 0.78377816893733 | 1.41583097647905 | 0.915445061062625 | 2.18972982565524 |
| Gluconate | Postpartum Depression | rs117851846 | 0.174021908127208 | 0.0883147232037691 | 0.0487840171655266 | 0.000925050647821002 | 0.347118765606596 | 1.19008163799468 | 1.00092547863913 | 1.41498476691562 |
| Gluconate | Postpartum Depression | rs11843333 | 0.433926530612245 | 0.245673469387755 | 0.0773499806972037 | -0.047593469 | 0.915446530612245 | 1.54330547824259 | 0.953521343911038 | 2.49789038743931 |
| Gluconate | Postpartum Depression | rs11917642 | 0.0659579008073818 | 0.3059723183391 | 0.829324348529271 | -0.533747843 | 0.665663644752018 | 1.06818174663029 | 0.586403099291949 | 1.9457814005619 |
| Gluconate | Postpartum Depression | rs12408548 | 0.468772549019608 | 0.274324183006536 | 0.0874830144387158 | -0.06890285 | 1.00644794771242 | 1.59803148358763 | 0.933417357474778 | 2.73586579688848 |
| Gluconate | Postpartum Depression | rs12712328 | 0.398907962771458 | 0.257852119958635 | 0.121853208607375 | -0.106482192 | 0.904298117890383 | 1.49019645874355 | 0.898991056939064 | 2.47019752700647 |
| Gluconate | Postpartum Depression | rs13015475 | -0.013239149 | 0.175545010467551 | 0.939882613774632 | -0.357307369 | 0.330829071877181 | 0.986848103417047 | 0.699557442305254 | 1.39212181920133 |
| Gluconate | Postpartum Depression | rs138039230 | 0.131131873859786 | 0.333583528798541 | 0.694245206338769 | -0.522691843 | 0.784955590304926 | 1.14011812317621 | 0.592922344262751 | 2.19230957877142 |
| Gluconate | Postpartum Depression | rs138425480 | -0.152546152 | 0.298720955020252 | 0.609586084687451 | -0.738039224 | 0.43294691963334 | 0.858519270483517 | 0.478050346779812 | 1.54179437951759 |
| Gluconate | Postpartum Depression | rs138673030 | 0.0514234920634921 | 0.257877777777778 | 0.841941782712605 | -0.454016952 | 0.556863936507937 | 1.05276863805476 | 0.635071967172753 | 1.74519088002856 |
| Gluconate | Postpartum Depression | rs139969551 | 0.0372124146757679 | 0.396628412969283 | 0.925250668026958 | -0.740179275 | 0.814604104095563 | 1.03791346547673 | 0.477028388712585 | 2.25828145097458 |
| Gluconate | Postpartum Depression | rs140154925 | -0.005436471 | 0.260266666666667 | 0.983334936456065 | -0.515559137 | 0.504686196078431 | 0.994578280275009 | 0.597166603158196 | 1.6564656334821 |
| Gluconate | Postpartum Depression | rs140584719 | 0.197773182552504 | 0.325386106623586 | 0.54331298021913 | -0.439983586 | 0.835529951534734 | 1.21868594323598 | 0.644046992106952 | 2.30603581173829 |
| Gluconate | Postpartum Depression | rs145530098 | 0.470477891916034 | 0.26943858865565 | 0.0807863731618123 | -0.057621742 | 0.998577525681108 | 1.60075900024099 | 0.944006958237936 | 2.71441789119385 |
| Gluconate | Postpartum Depression | rs149857136 | 0.424883720930233 | 0.232693475452196 | 0.0678596909292784 | -0.031195491 | 0.880962932816538 | 1.52941257065251 | 0.969286067893235 | 2.41322235896161 |
| Gluconate | Postpartum Depression | rs1501691 | 0.0743401788208997 | 0.0391573065101984 | 0.0576301388437709 | -0.002408142 | 0.151088499580889 | 1.07717317467764 | 0.997594755308582 | 1.16309958735317 |
| Gluconate | Postpartum Depression | rs150297839 | -0.09143448 | 0.262150439238653 | 0.727249753662593 | -0.605249341 | 0.422380380673499 | 0.912621108914451 | 0.54593828479213 | 1.52558871879331 |
| Gluconate | Postpartum Depression | rs17432367 | -0.061185719 | 0.218234763793725 | 0.77919632700121 | -0.488925856 | 0.366554417598269 | 0.940648526837492 | 0.613284796406054 | 1.44275490967121 |
| Gluconate | Postpartum Depression | rs17808132 | 0.230285619174434 | 0.266135153129161 | 0.386876478271948 | -0.291339281 | 0.75191051930759 | 1.25895954156738 | 0.747262103201179 | 2.12104845209423 |
| Gluconate | Postpartum Depression | rs180845128 | 0.272103374397429 | 0.161997321906802 | 0.0930199383164921 | -0.045411377 | 0.589618125334762 | 1.31272269621501 | 0.955604287777817 | 1.80329964944514 |
| Gluconate | Postpartum Depression | rs181910326 | 0.163880023467292 | 0.308093282487533 | 0.594783552389832 | -0.43998281 | 0.767742857142857 | 1.1780729655039 | 0.644047492030238 | 2.15489685034902 |
| Gluconate | Postpartum Depression | rs184887578 | -0.095584697 | 0.175886910490857 | 0.58682409628455 | -0.440323041 | 0.24915364773821 | 0.908841382415277 | 0.643828404265903 | 1.28293913862392 |
| Gluconate | Postpartum Depression | rs1887656 | 0.0850098146128681 | 0.202438386041439 | 0.674537085032962 | -0.311769422 | 0.481789051254089 | 1.08872775208737 | 0.732150326504209 | 1.61896822996008 |
| Gluconate | Postpartum Depression | rs2165494 | 0.283219387755102 | 0.279080612244898 | 0.310186853448429 | -0.263778612 | 0.830217387755102 | 1.32739634437917 | 0.768143578416184 | 2.29381733386897 |
| Gluconate | Postpartum Depression | rs2489320 | -0.029382657 | 0.246786900369004 | 0.905227151408181 | -0.513084982 | 0.454319667896679 | 0.971044816436399 | 0.598645915586301 | 1.57510142636573 |
| Gluconate | Postpartum Depression | rs2841616 | -0.314230496 | 0.240054964539007 | 0.190536399811591 | -0.784738227 | 0.156277234042553 | 0.730350665518168 | 0.456239117260174 | 1.16915028642458 |
| Gluconate | Postpartum Depression | rs3098326 | 0.617721329846844 | 0.254317519611505 | 0.0151431475458892 | 0.119258991408293 | 1.11618366828539 | 1.85469698042796 | 1.12666167619951 | 3.05317999349385 |
| Gluconate | Postpartum Depression | rs35932279 | -0.057377289 | 0.415911355311355 | 0.890275529269745 | -0.872563546 | 0.757808967032967 | 0.944237751280042 | 0.417878923218769 | 2.13359631559026 |
| Gluconate | Postpartum Depression | rs3733510 | -0.331612403 | 0.283720225510923 | 0.24248393130993 | -0.887704045 | 0.224479238900634 | 0.717765472617525 | 0.411599683035218 | 1.25167072501797 |
| Gluconate | Postpartum Depression | rs3802367 | 0.493923076923077 | 0.256709962168979 | 0.0543481826034332 | -0.009228449 | 0.997074602774275 | 1.63873249959919 | 0.990814002519319 | 2.71034139446394 |
| Gluconate | Postpartum Depression | rs3961459 | -0.065180739 | 0.129926385224274 | 0.615896588917208 | -0.319836454 | 0.189474976253298 | 0.93689811424585 | 0.726267805682373 | 1.20861487953841 |
| Gluconate | Postpartum Depression | rs4741472 | 0.284767605633803 | 0.255556338028169 | 0.265148529865759 | -0.216122817 | 0.785658028169014 | 1.3294530348233 | 0.805636350036952 | 2.19385008101957 |
| Gluconate | Postpartum Depression | rs4808387 | -0.162951378 | 0.234312803889789 | 0.486777243904632 | -0.622204473 | 0.296301717990275 | 0.849632498552839 | 0.536759859632813 | 1.34487586886799 |
| Gluconate | Postpartum Depression | rs55757634 | 0.212380952380952 | 0.239239795918367 | 0.37468463636836 | -0.256529048 | 0.681290952380952 | 1.23661888826773 | 0.773732519145584 | 1.9764275598875 |
| Gluconate | Postpartum Depression | rs57482699 | 0.357080103359173 | 0.249103359173127 | 0.15172596120233 | -0.131162481 | 0.845322687338501 | 1.42915034501229 | 0.877075255081676 | 2.32872914475116 |
| Gluconate | Postpartum Depression | rs5755496 | 0.208205053449951 | 0.169737609329446 | 0.219962109817012 | -0.124480661 | 0.540890767735666 | 1.23146565994304 | 0.882955336819548 | 1.71753610673161 |
| Gluconate | Postpartum Depression | rs72929778 | 0.2298044375645 | 0.354704850361197 | 0.517065742001136 | -0.465417069 | 0.925025944272446 | 1.25835389911201 | 0.627873184042761 | 2.52193368924412 |
| Gluconate | Postpartum Depression | rs73039639 | -0.661026856 | 0.23490205371248 | 0.00489211442458839 | -1.121434882 | -0.200618831 | 0.516320874873155 | 0.325811957502186 | 0.818224253871932 |
| Gluconate | Postpartum Depression | rs73213462 | -0.24764436 | 0.104935839944809 | 0.0182769172579287 | -0.453318606 | -0.041970114 | 0.780637519747061 | 0.635515622012733 | 0.958898437943723 |
| Gluconate | Postpartum Depression | rs74397423 | -0.09985348 | 0.14167032967033 | 0.48091611833462 | -0.377527326 | 0.177820366300366 | 0.904970004660096 | 0.685554467861924 | 1.19461070961825 |
| Gluconate | Postpartum Depression | rs74676455 | 0.0876896109448482 | 0.151058144506199 | 0.561575888757014 | -0.208384352 | 0.383763574176999 | 1.09164923346314 | 0.811894923064255 | 1.46779837521701 |
| Gluconate | Postpartum Depression | rs74988287 | 0.0999115130774872 | 0.248435590320215 | 0.687564334705316 | -0.387022244 | 0.586845270105109 | 1.10507312922884 | 0.679075989426188 | 1.7983062867169 |
| Gluconate | Postpartum Depression | rs76099387 | -0.444602467 | 0.607309801233722 | 0.464116616670493 | -1.634929678 | 0.74572474297464 | 0.641079075187191 | 0.194966081248879 | 2.10796861695258 |
| Gluconate | Postpartum Depression | rs77348447 | 0.122838772213247 | 0.198597738287561 | 0.536225653150739 | -0.266412795 | 0.512090339256866 | 1.13070210565277 | 0.766122810682858 | 1.66877585930129 |
| Gluconate | Postpartum Depression | rs77585244 | 0.162902358749314 | 0.281878771256171 | 0.563320576707782 | -0.389580033 | 0.71538475041141 | 1.17692176796462 | 0.677341275817046 | 2.04497333524838 |
| Gluconate | Postpartum Depression | rs7847753 | 0.0817648902821317 | 0.224173981191223 | 0.715306587899529 | -0.357616113 | 0.521145893416928 | 1.08520063861813 | 0.69934149169263 | 1.68395617884317 |
| Gluconate | Postpartum Depression | rs80152280 | -0.242739716 | 0.159255551510739 | 0.12745498769274 | -0.554880597 | 0.0694011649071714 | 0.784475673624606 | 0.574140811230529 | 1.07186611798213 |
| Gluconate | Postpartum Depression | rs897710 | -0.031983306 | 0.230153719008264 | 0.889477826429527 | -0.483084595 | 0.419117983471074 | 0.968522750671148 | 0.616877636377058 | 1.52061975220357 |
| Gluconate | Postpartum Depression | All - Inverse variance weighted | 0.0676648055736772 | 0.0259968529001544 | 0.00924638352067668 | 0.0167109738893746 | 0.11861863725798 | 1.07000658811713 | 1.01685138324887 | 1.12594044466561 |
| Gluconate | Postpartum Depression | All - MR Egger | 0.0723722071457444 | 0.0374014322787552 | 0.0585439046455458 | -0.0009346 | 0.145679014412105 | 1.07505541291171 | 0.99906583648205 | 1.15682480435966 |
| Arachidonate (204n6) | Postpartum Depression | rs10753761 | -0.021093036 | 0.0915461993627674 | 0.817774242353632 | -0.200523587 | 0.158337514792899 | 0.979127866232653 | 0.818302188742385 | 1.17156154733825 |
| Arachidonate (204n7) | Postpartum Depression | rs116993684 | -0.005451222 | 0.0939004747670125 | 0.953706260583709 | -0.189496153 | 0.178593708457886 | 0.994563608864483 | 0.82737590011354 | 1.19553490975722 |
| Arachidonate (204n8) | Postpartum Depression | rs12109176 | -0.01144829 | 0.153675200897029 | 0.940615194329489 | -0.312651684 | 0.289755103718931 | 0.988616992272067 | 0.731504663125862 | 1.33610024197604 |
| Arachidonate (204n9) | Postpartum Depression | rs12419532 | 0.190914919551438 | 0.0988898098488542 | 0.0535347247283971 | -0.002909108 | 0.384738946855193 | 1.21035647002909 | 0.997095119601372 | 1.46923072407271 |
| Arachidonate (204n10) | Postpartum Depression | rs12755262 | 0.0322807024314936 | 0.085390968737939 | 0.70540522382842 | -0.135085596 | 0.199647001157854 | 1.03280737616124 | 0.873641128043875 | 1.22097168049018 |
| Arachidonate (204n11) | Postpartum Depression | rs1361755 | -0.042536645 | 0.0905953947368421 | 0.638695665607389 | -0.220103618 | 0.135030328947368 | 0.958355346198019 | 0.802435646539853 | 1.14457149747361 |
| Arachidonate (204n12) | Postpartum Depression | rs138426 | 0.0973803628601921 | 0.0993641408751334 | 0.327068707875669 | -0.097373353 | 0.292134078975454 | 1.10227956010068 | 0.907217230389674 | 1.33928257523711 |
| Arachidonate (204n13) | Postpartum Depression | rs142669356 | -0.064353765 | 0.0666751313485114 | 0.334452694375181 | -0.195037023 | 0.0663294921190893 | 0.937673224576861 | 0.822804195004048 | 1.06857874744312 |
| Arachidonate (204n14) | Postpartum Depression | rs146468131 | 0.0104062551271534 | 0.0730760869565217 | 0.886761680814102 | -0.132822875 | 0.153635385561936 | 1.01046058850549 | 0.875620172327755 | 1.16606564488863 |
| Arachidonate (204n15) | Postpartum Depression | rs149937479 | 0.0107750175438596 | 0.0791120467836257 | 0.891663607119786 | -0.144284594 | 0.165834629239766 | 1.01083327710664 | 0.865641356532235 | 1.1803778855939 |
| Arachidonate (204n16) | Postpartum Depression | rs1920592 | 0.124156196943973 | 0.0881839275608376 | 0.159153814291602 | -0.048684301 | 0.296996694963214 | 1.13219270222864 | 0.952481779712246 | 1.34581085148638 |
| Arachidonate (204n17) | Postpartum Depression | rs2582703 | -0.00251163 | 0.0885032467532468 | 0.977359906996735 | -0.175977994 | 0.170954733766234 | 0.99749152163315 | 0.838636438581346 | 1.18643704226967 |
| Arachidonate (204n18) | Postpartum Depression | rs308203 | 0.0504937625754527 | 0.089486921529175 | 0.572578171068255 | -0.124900604 | 0.225888128772636 | 1.05179030287189 | 0.882584623940067 | 1.25343543407398 |
| Arachidonate (204n19) | Postpartum Depression | rs429696 | 0.251731593903384 | 0.0802632394730044 | 0.00171079580506684 | 0.0944156445362955 | 0.409047543270473 | 1.28625075340477 | 1.09901645118031 | 1.50538328962913 |
| Arachidonate (204n20) | Postpartum Depression | rs4900146 | 0.066194935570872 | 0.0623348816302068 | 0.288269979421838 | -0.055981432 | 0.188371303566077 | 1.06843497284849 | 0.945556692422838 | 1.20728170013867 |
| Arachidonate (204n21) | Postpartum Depression | rs55841501 | 0.0439937995177403 | 0.0881526007578367 | 0.617734218194013 | -0.128785298 | 0.2167728970031 | 1.04497587551398 | 0.87916270330286 | 1.24206199410399 |
| Arachidonate (204n22) | Postpartum Depression | rs72659043 | -0.005691981 | 0.0915759262480431 | 0.950438706468602 | -0.185180797 | 0.17379683423204 | 0.994324187419215 | 0.830954036555767 | 1.18981381182632 |
| Arachidonate (204n23) | Postpartum Depression | rs72728326 | 0.0236439580764488 | 0.0843255240443896 | 0.779178996169497 | -0.141634069 | 0.188921985203452 | 1.02392569251038 | 0.867938804052757 | 1.20794671108993 |
| Arachidonate (204n24) | Postpartum Depression | rs738893 | -0.047348684 | 0.112280921052632 | 0.67324517602496 | -0.267419289 | 0.172721921052632 | 0.953754780371925 | 0.765352100100885 | 1.18853555241097 |
| Arachidonate (204n25) | Postpartum Depression | rs74642636 | 0.0362170063825407 | 0.109281449454396 | 0.740334527524749 | -0.177974635 | 0.250408647313156 | 1.03688083183686 | 0.836963653180824 | 1.28455023745029 |
| Arachidonate (204n26) | Postpartum Depression | rs75144658 | -0.084890057 | 0.121799514955538 | 0.485824401496791 | -0.323617106 | 0.153836992724333 | 0.918613274326977 | 0.723527223653343 | 1.16630075577368 |
| Arachidonate (204n27) | Postpartum Depression | rs7701684 | 0.153063630274615 | 0.0927059611520429 | 0.0987251653910193 | -0.028640054 | 0.334767314132619 | 1.1653991312503 | 0.971766185278627 | 1.39761514209259 |
| Arachidonate (204n28) | Postpartum Depression | rs78171415 | -0.116265794 | 0.220667138559547 | 0.598274746 | -0.548773385 | 0.316241797911874 | 0.890238572076016 | 0.577657939744962 | 1.37196195305797 |
| Arachidonate (204n29) | Postpartum Depression | rs80320661 | -0.013010458 | 0.100323434473854 | 0.896815542082266 | -0.20964439 | 0.183623473208522 | 0.987073811792806 | 0.810872549150178 | 1.20156331713078 |
| Arachidonate (204n30) | Postpartum Depression | All - Inverse variance weighted | 0.0365912428272888 | 0.018384770688829 | 0.0465576960679364 | 0.000557092277183882 | 0.0726253933773937 | 1.03726894305114 | 1.00055724748191 | 1.07532763660071 |
| Arachidonate (204n31) | Postpartum Depression | All - MR Egger | 0.0333434992022546 | 0.0382640779195516 | 0.392943566622173 | -0.041654094 | 0.108341091924576 | 1.0339056240092 | 0.959201517214616 | 1.1144278028896 |

**Supplementary Table S3: Instrumental Variables Associated with Postpartum Depression on Cerebrospinal Fluid Metabolites**

| SNP | pos.exposure | other_allele.exposure | effect_allele.exposure | pval.exposure | beta.exposure | se.exposure | eaf.exposure |
| --- | --- | --- | --- | --- | --- | --- | --- |
| rs12037767 | 34649764 | G | C | 1.49293e-06 | 0.108365 | 0.0225189 | 0.0918765 |
| rs1343635 | 57965463 | T | C | 4.67843e-06 | 0.060718 | 0.0132609 | 0.513304 |
| rs13008867 | 23047998 | G | C | 1.42636e-07 | 0.0949732 | 0.0180495 | 0.154422 |
| rs77609760 | 141601381 | A | G | 1.19374e-06 | 0.134762 | 0.0277478 | 0.0595133 |
| rs28362638 | 39108485 | C | T | 2.32284e-06 | 0.145123 | 0.0307263 | 0.0463454 |
| rs1920133 | 177161217 | C | T | 4.12515e-06 | 0.128372 | 0.0278768 | 0.0564242 |
| rs154171 | 107724544 | T | C | 4.72835e-06 | -0.0646289 | 0.0141219 | 0.344796 |
| rs250665 | 149074831 | A | C | 4.7386e-06 | 0.0705792 | 0.0154236 | 0.240206 |
| rs6873557 | 165095198 | A | G | 1.6112e-06 | 0.0654768 | 0.0136497 | 0.613283 |
| rs2347923 | 151906286 | C | A | 1.99228e-10 | -0.0891454 | 0.0140123 | 0.676221 |
| rs6462527 | 4008232 | G | A | 1.17282e-06 | -0.0702734 | 0.014459 | 0.307678 |
| rs7818243 | 1181480 | T | C | 3.15464e-06 | 0.0680662 | 0.014605 | 0.28615 |
| rs7841225 | 112256517 | C | T | 2.52435e-06 | -0.204546 | 0.0434634 | 0.0267363 |
| rs74840166 | 134521985 | T | C | 1.15702e-06 | 0.129099 | 0.0265479 | 0.0626675 |
| rs61925040 | 60613595 | A | G | 1.12629e-06 | -0.0738978 | 0.0151798 | 0.266175 |
| rs192348978 | 63074063 | C | T | 2.82455e-06 | -0.24692 | 0.0527249 | 0.018007 |
| rs34227011 | 49341877 | C | T | 3.82525e-06 | 0.0615286 | 0.013316 | 0.523232 |
| rs74059360 | 59917810 | T | C | 4.56447e-06 | -0.111747 | 0.0243783 | 0.0848245 |
| rs1489869 | 62572990 | T | C | 3.33112e-06 | -0.0618612 | 0.0133056 | 0.546668 |
| rs75847658 | 88694603 | C | T | 7.15946e-07 | -0.320542 | 0.0646648 | 0.0119799 |
| rs8093506 | 54806939 | A | G | 1.19215e-06 | -0.0685538 | 0.0141146 | 0.336443 |
| rs140241916 | 57030901 | T | C | 7.22404e-07 | -0.176302 | 0.0355789 | 0.0390391 |

**Supplementary Table S4: Effect of Guanosine metabolites on individual SNPs associated with Postpartum Depression**

| exposure | outcome | SNP | b | se | p | lo_ci | up_ci | or | or_lci95 | or_uci95 |
| --- | --- | --- | --- | --- | --- | --- | --- | --- | --- | --- |
| Postpartum Depression | Maleate | rs12037767 | -0.090435104 | 0.611821159968625 | 0.882490372142456 | -1.289604577 | 1.1087343699534 | 0.913533617033931 | 0.275379652977991 | 3.03052044850167 |
| Postpartum Depression | Maleate | rs13008867 | -0.186368365 | 0.515935021669271 | 0.71793163614902 | -1.197601007 | 0.824864277501443 | 0.829967807597891 | 0.301917641989793 | 2.28157108378627 |
| Postpartum Depression | Maleate | rs1343635 | -0.223986297 | 0.556671827135281 | 0.687414052766831 | -1.315063078 | 0.867090483876281 | 0.799326087212808 | 0.268457388817348 | 2.37997619105819 |
| Postpartum Depression | Maleate | rs140241916 | 0.279633810166646 | 0.66420120021327 | 0.673749469604446 | -1.022200542 | 1.58146816258466 | 1.32264538435367 | 0.359802308201523 | 4.86208891070324 |
| Postpartum Depression | Maleate | rs1489869 | 0.0889087182272571 | 0.554467097308167 | 0.872605488913331 | -0.997846792 | 1.17566422895126 | 1.0929808825401 | 0.368672415357075 | 3.24029452662227 |
| Postpartum Depression | Maleate | rs154171 | -0.80149902 | 0.505965597433965 | 0.113171451465296 | -1.793191591 | 0.190193551182211 | 0.448655915691013 | 0.166428150577633 | 1.20948367199842 |
| Postpartum Depression | Maleate | rs1920133 | -0.23992771 | 1.78699404854641 | 0.893194376305117 | -3.742436045 | 3.26258062505842 | 0.786684728377274 | 0.0236963074863426 | 26.1168480455748 |
| Postpartum Depression | Maleate | rs192348978 | -0.862222582 | 0.52486635347481 | 0.100435307930109 | -1.890960635 | 0.166515470597764 | 0.422222614209722 | 0.150926753649442 | 1.18118180931768 |
| Postpartum Depression | Maleate | rs2347923 | -0.596777848 | 0.389251716858077 | 0.125241065720052 | -1.359711213 | 0.166155516717632 | 0.550582842442291 | 0.256734907858897 | 1.18075671485407 |
| Postpartum Depression | Maleate | rs250665 | -0.664501723 | 0.532734856728328 | 0.21227270058785 | -1.708662042 | 0.379658596300327 | 0.514529842287751 | 0.181107945396758 | 1.4617854452751 |
| Postpartum Depression | Maleate | rs28362638 | 0.191561640815033 | 0.412753319597858 | 0.642571198042695 | -0.617434866 | 1.00055814722684 | 1.21113948646419 | 0.539326108707021 | 2.71979945341304 |
| Postpartum Depression | Maleate | rs34227011 | -0.537961208 | 0.539586468731614 | 0.31877035809008 | -1.595550687 | 0.519628270430337 | 0.583937566653746 | 0.202796820175182 | 1.68140250648381 |
| Postpartum Depression | Maleate | rs61925040 | -0.066307793 | 0.603536235178855 | 0.912516066995781 | -1.249238814 | 1.11662322829638 | 0.935842774426486 | 0.286722963435919 | 3.05452234432559 |
| Postpartum Depression | Maleate | rs6462527 | -0.093918894 | 0.525091997825635 | 0.858046227151526 | -1.12309921 | 0.935261421818213 | 0.910356594701365 | 0.325270150489812 | 2.54787944196012 |
| Postpartum Depression | Maleate | rs6873557 | -0.566612907 | 0.487195464653129 | 0.244825686833031 | -1.521516018 | 0.388290203553014 | 0.567444173491826 | 0.218380567026364 | 1.47445761504479 |
| Postpartum Depression | Maleate | rs74059360 | -0.736485096 | 0.487708842295543 | 0.131020016083588 | -1.692394427 | 0.219424235102508 | 0.478793875948514 | 0.184078234047853 | 1.24535948984716 |
| Postpartum Depression | Maleate | rs74840166 | -0.111542305 | 0.697914003981441 | 0.873020962858206 | -1.479453753 | 1.25636914306075 | 0.894453550975374 | 0.22776206885958 | 3.51264439622605 |
| Postpartum Depression | Maleate | rs75847658 | -0.623007281 | 0.435512350955569 | 0.152569046037851 | -1.476611489 | 0.230596926455816 | 0.5363291173627 | 0.22841034947478 | 1.25935152585025 |
| Postpartum Depression | Maleate | rs77609760 | -0.599575548 | 0.509045576646236 | 0.238859375664507 | -1.597304878 | 0.398153782223476 | 0.549044629732673 | 0.202441387610806 | 1.48907300525832 |
| Postpartum Depression | Maleate | rs7818243 | -0.352597912 | 0.511266972447411 | 0.49041106256261 | -1.354681178 | 0.649485353964229 | 0.702859748014903 | 0.258029546827731 | 1.91455525715197 |
| Postpartum Depression | Maleate | rs7841225 | -0.15595514 | 0.33977687170612 | 0.646239332348904 | -0.821917808 | 0.510007528868812 | 0.855597571895096 | 0.439587800492723 | 1.66530373275202 |
| Postpartum Depression | Maleate | rs8093506 | -0.816876672 | 0.555767878658805 | 0.141611520620883 | -1.906181714 | 0.27242837012682 | 0.441809417487824 | 0.148646880660394 | 1.31314939481901 |
| Postpartum Depression | Maleate | All - Inverse variance weighted | -0.371461126 | 0.109011223164678 | 0.000655490467577139 | -0.585123123 | -0.157799129 | 0.689725817739841 | 0.557037273289848 | 0.854021313236889 |
| Postpartum Depression | Maleate | All - MR Egger | -0.284198715 | 0.276786950898095 | 0.316784072351696 | -0.826701139 | 0.258303708362727 | 0.752617073244708 | 0.437490127498056 | 1.29473197984781 |

**Supplementary Table S5: Horizontal pleiotropy and heterogeneity in MR Analysis**

| Exposure | Outcome | Method | nSNPs | HORIZONTAL PLEIOTROPY | | | | HETEROGENEITY | | |
| --- | --- | --- | --- | --- | --- | --- | --- | --- | --- | --- |
| MR-EGGER REGRESSION | | | MR-PRESSO | Q | Q DEGREES OF FREEDOM | Q P-VALUE |
| MR-EGGER INTERCEPT | SE | P-VALUE | GLOBAL TEXT P-VALUE |
| Guanosine | Postpartum Depression | MR-Egger | 56 | -0.001040261 | 0.00528009691828299 | 0.844555021732069 | 0.715 | 49.2853271150494 | 54 | 0.65649087297727 |
| Inverse Variance Weighted | 49.324142251704 | 55 | 0.690339919991932 |
| Argininosuccinate | Postpartum Depression | MR-Egger | 34 | 0.00143344785571232 | 0.00875253082659096 | 0.870938118725823 | 0.48 | 33.2570283919312 | 32 | 0.405822534856225 |
| Inverse Variance Weighted | 33.2849043603248 | 33 | 0.453395295082664 |
| Maleate | Postpartum Depression | MR-Egger | 32 | -5.44E-05 | 0.00913448099370519 | 0.995289727551736 | 0.213 | 36.9497281135464 | 30 | 0.178613826404465 |
| Inverse Variance Weighted | 36.9497717595143 | 31 | 0.213136775093103 |
| N6-methyllysine | Postpartum Depression | MR-Egger | 16 | -0.001604739 | 0.010075938057775 | 0.875735299761848 | 0.845 | 10.1625408169376 | 14 | 0.750205923597103 |
| Inverse Variance Weighted | 10.1879059917591 | 15 | 0.80775653229508 |
| Homocarnosine | Postpartum Depression | MR-Egger | 91 | 0.00427526526801643 | 0.00480127094515489 | 0.37562804248674 | 0.55 | 88.2385716190952 | 89 | 0.502873911065053 |
| Inverse Variance Weighted | 89.0314630125409 | 90 | 0.509051135686663 |
| N-acetyl-isoputreanine | Postpartum Depression | MR-Egger | 22 | 0.00228156124193182 | 0.0139019844821491 | 0.871285766857215 | 0.089 | 30.7371530056657 | 20 | 0.058757477833981 |
| Inverse Variance Weighted | 30.7785476643318 | 21 | 0.0774232959101343 |
| Glucose | Postpartum Depression | MR-Egger | 45 | -0.000501421 | 0.00532221166017889 | 0.925377753860715 | 0.438 | 45.3746844729334 | 43 | 0.373292775488938 |
| Inverse Variance Weighted | 45.3840507090203 | 44 | 0.414111766385861 |
| Benzoate | Postpartum Depression | MR-Egger | 79 | 0.000416055434368452 | 0.0053483772091658 | 0.93819612444977 | 0.968 | 57.0825584498803 | 77 | 0.9567296896205 |
| Inverse Variance Weighted | 57.0886098844092 | 78 | 0.963915824775688 |
| Gluconate | Postpartum Depression | MR-Egger | 53 | -0.001112662 | 0.00629901219959265 | 0.860490225918412 | 0.097 | 66.0350289521525 | 51 | 0.0766571338604388 |
| Inverse Variance Weighted | 66.0754293622432 | 52 | 0.0907192472271803 |
| arachidonate (20:4n6) | Postpartum Depression | MR-Egger | 24 | 0.000916801666894089 | 0.00947304982893406 | 0.923777368014839 | 0.686 | 19.5037980447906 | 22 | 0.614047457662574 |
| Inverse Variance Weighted | 19.5131644112383 | 23 | 0.6710717634505 |
| Postpartum Depression | Maleate | MR-Egger | 22 | -0.008362651 | 0.0243815552792585 | 0.735184214453148 | 0.989 | 9.11284535182814 | 20 | 0.981563003209287 |
| Inverse Variance Weighted | 9.23048808684314 | 21 | 0.987281551002457 |

**A**  **B**


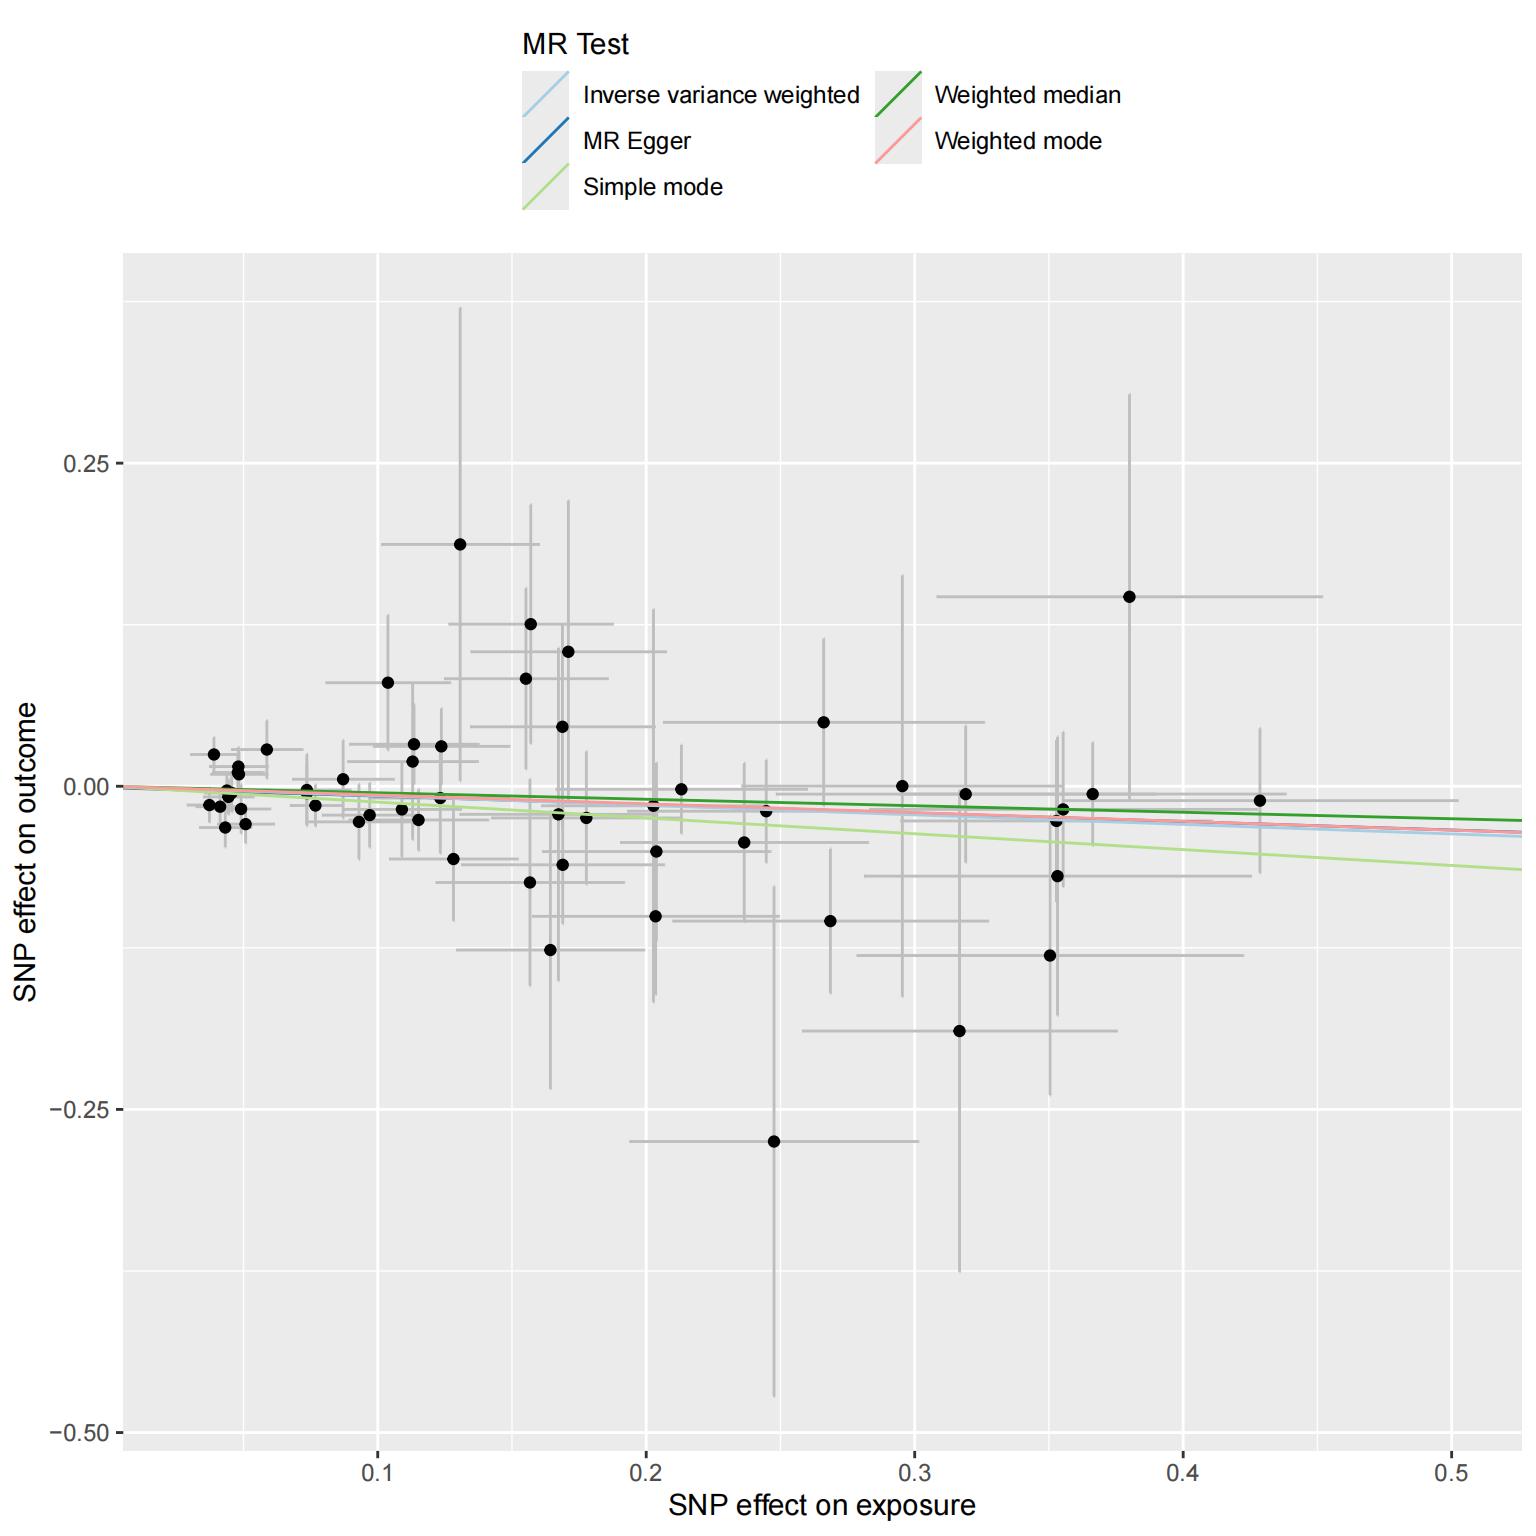

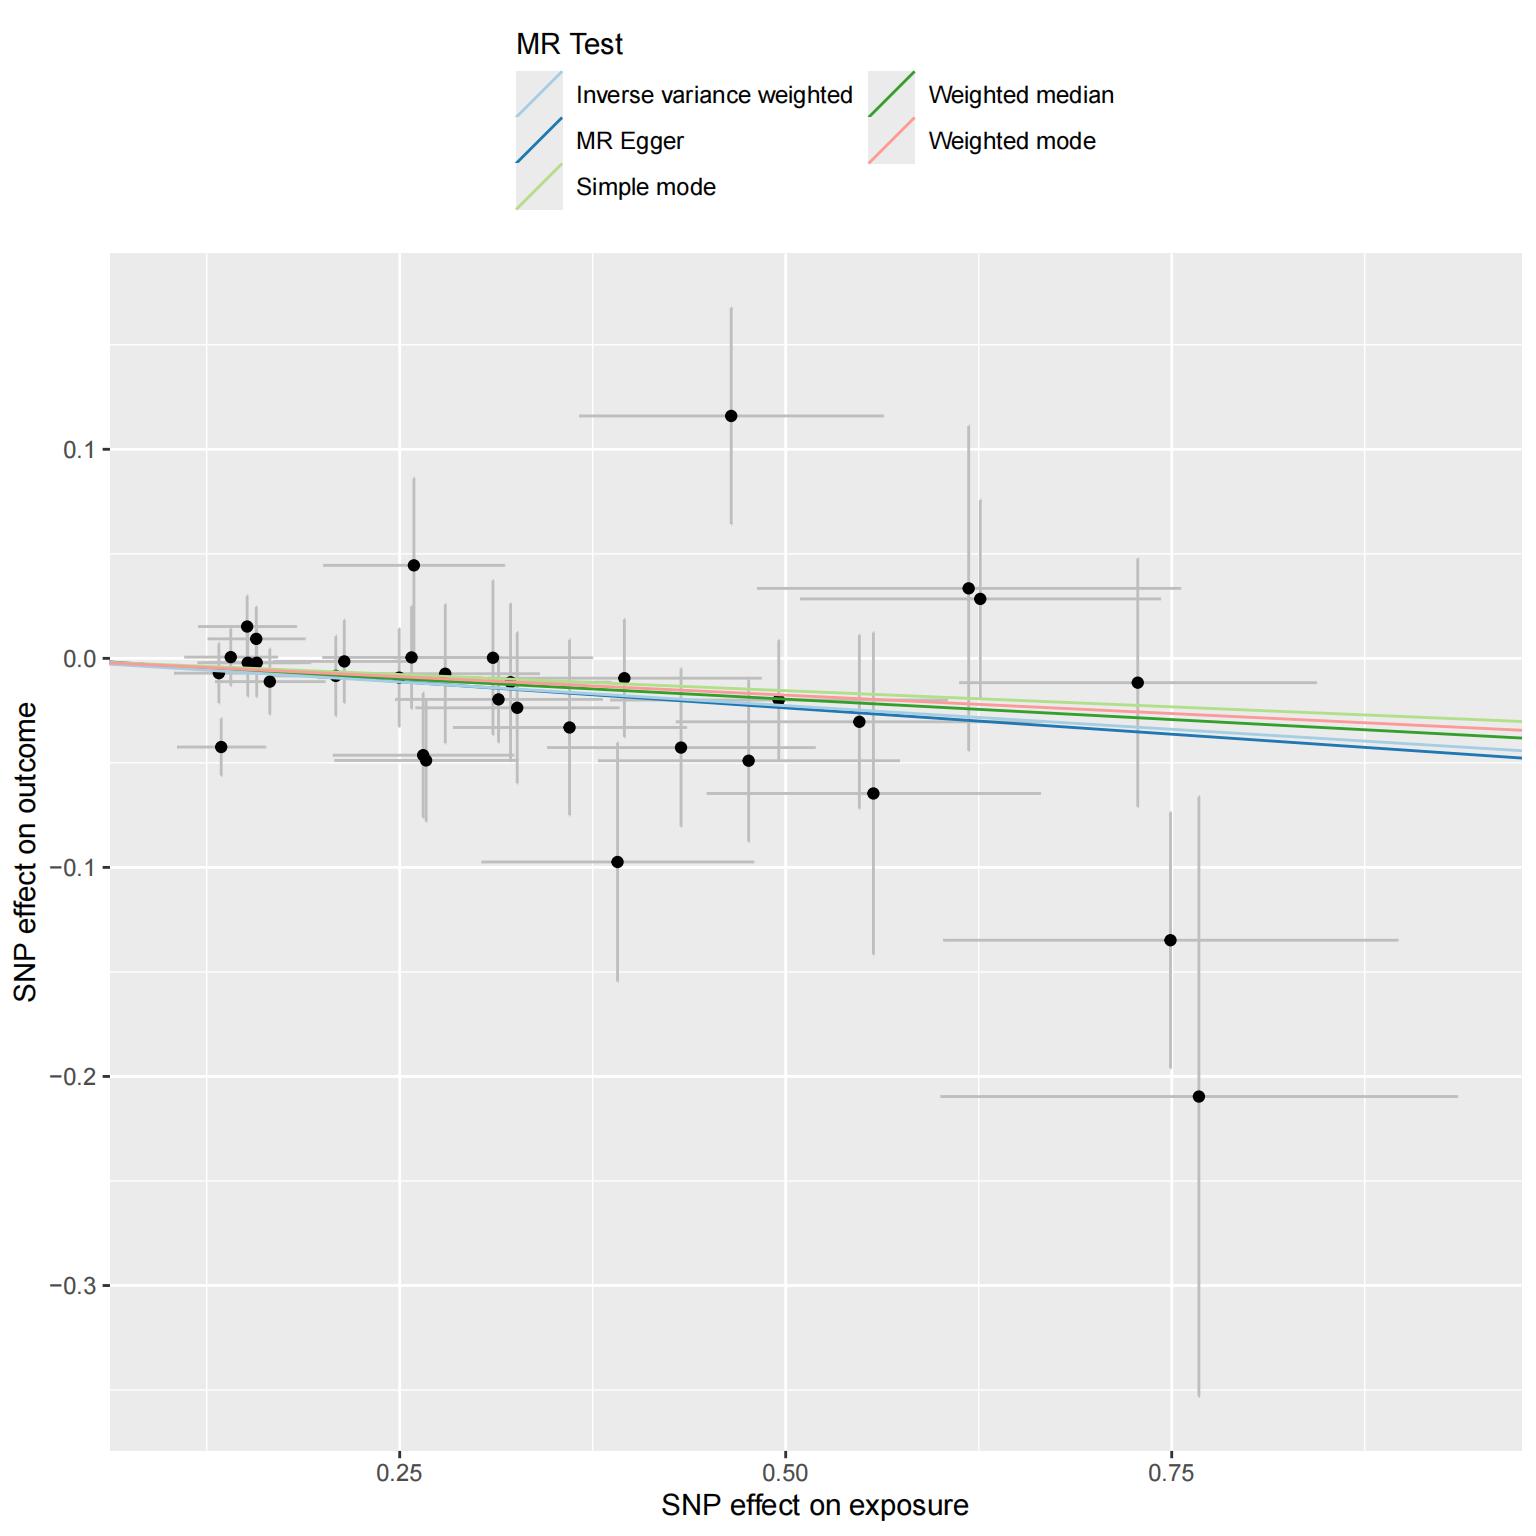


**C**   **D**


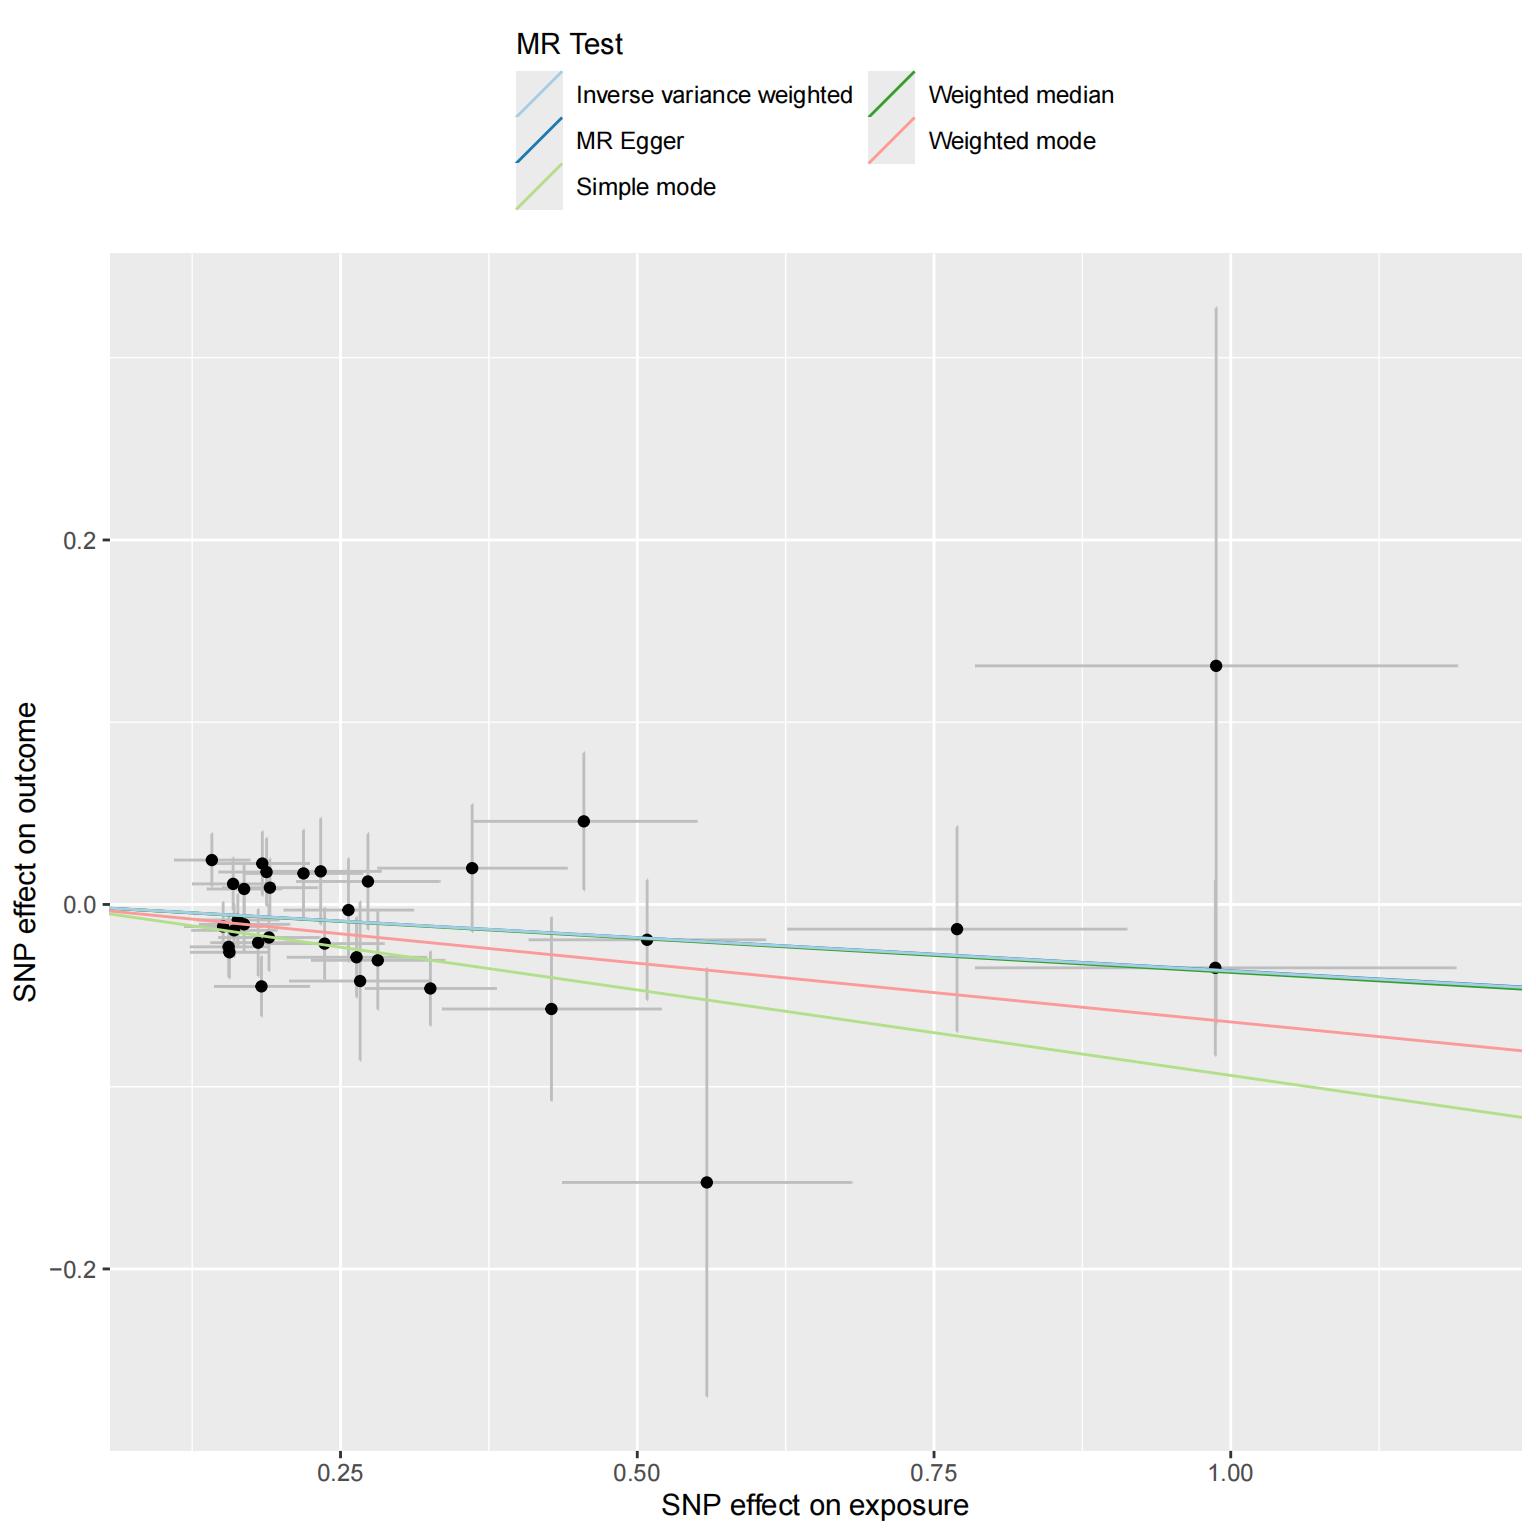

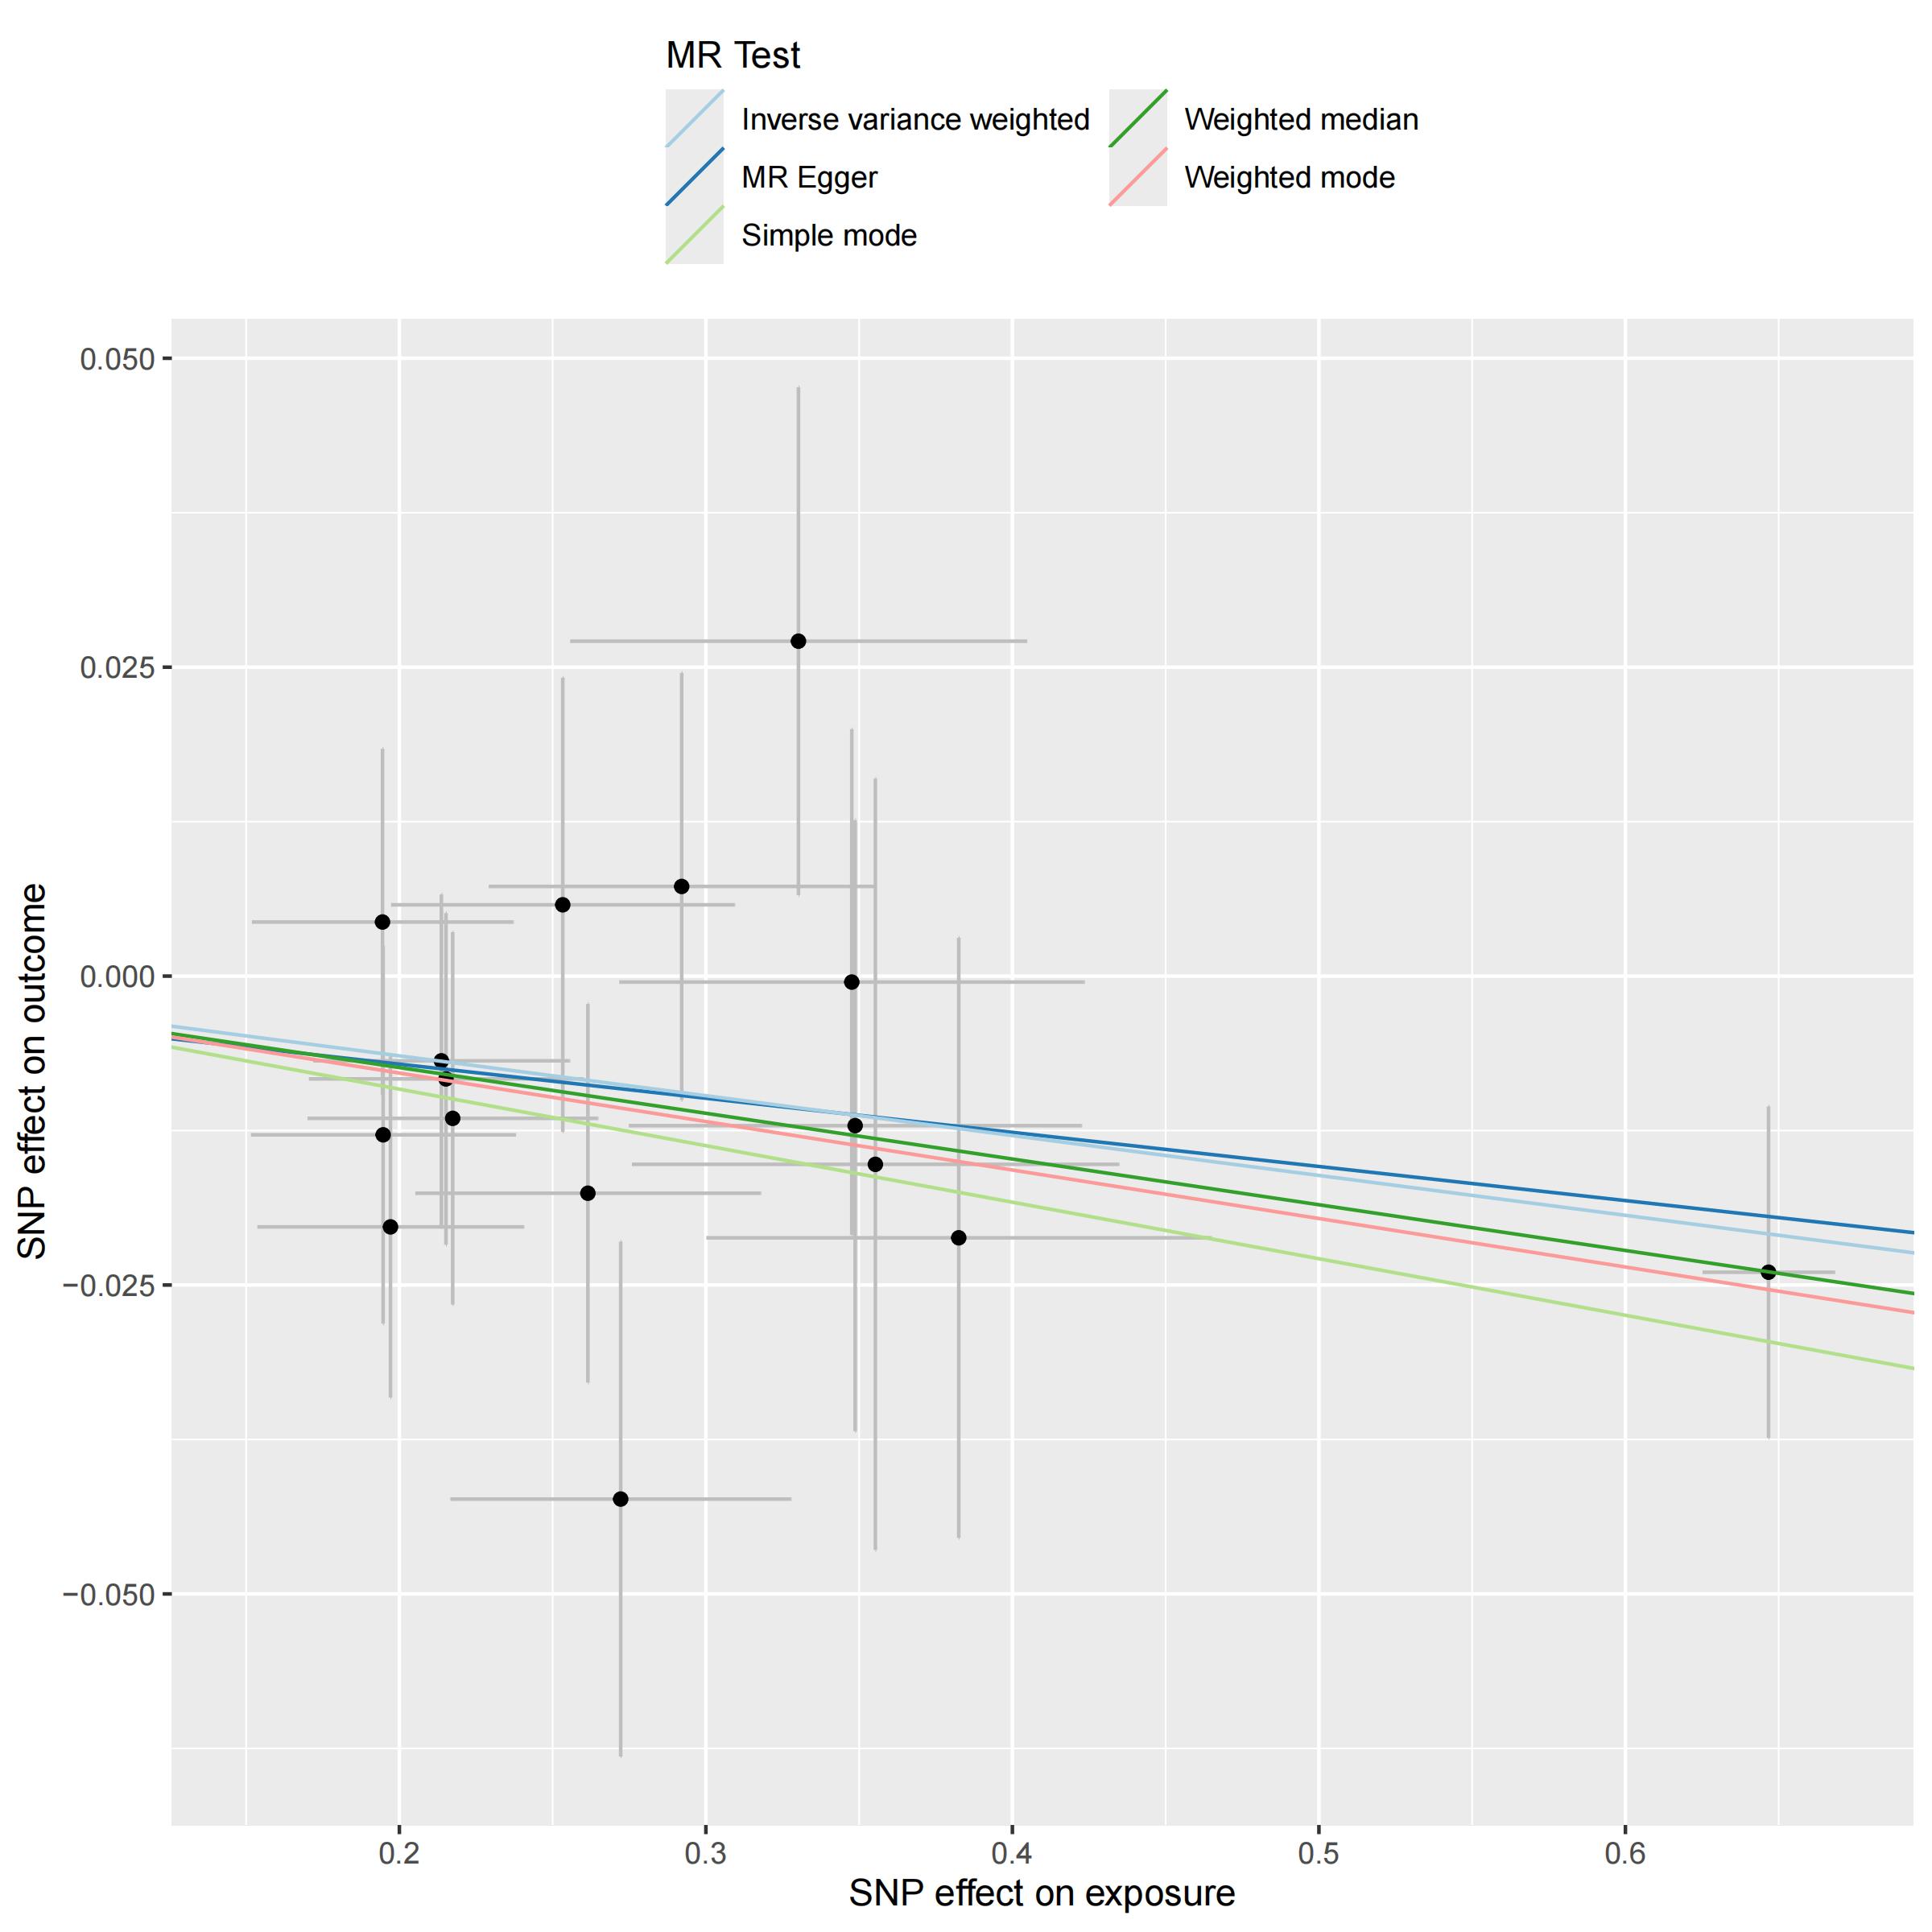


**E**  **F**


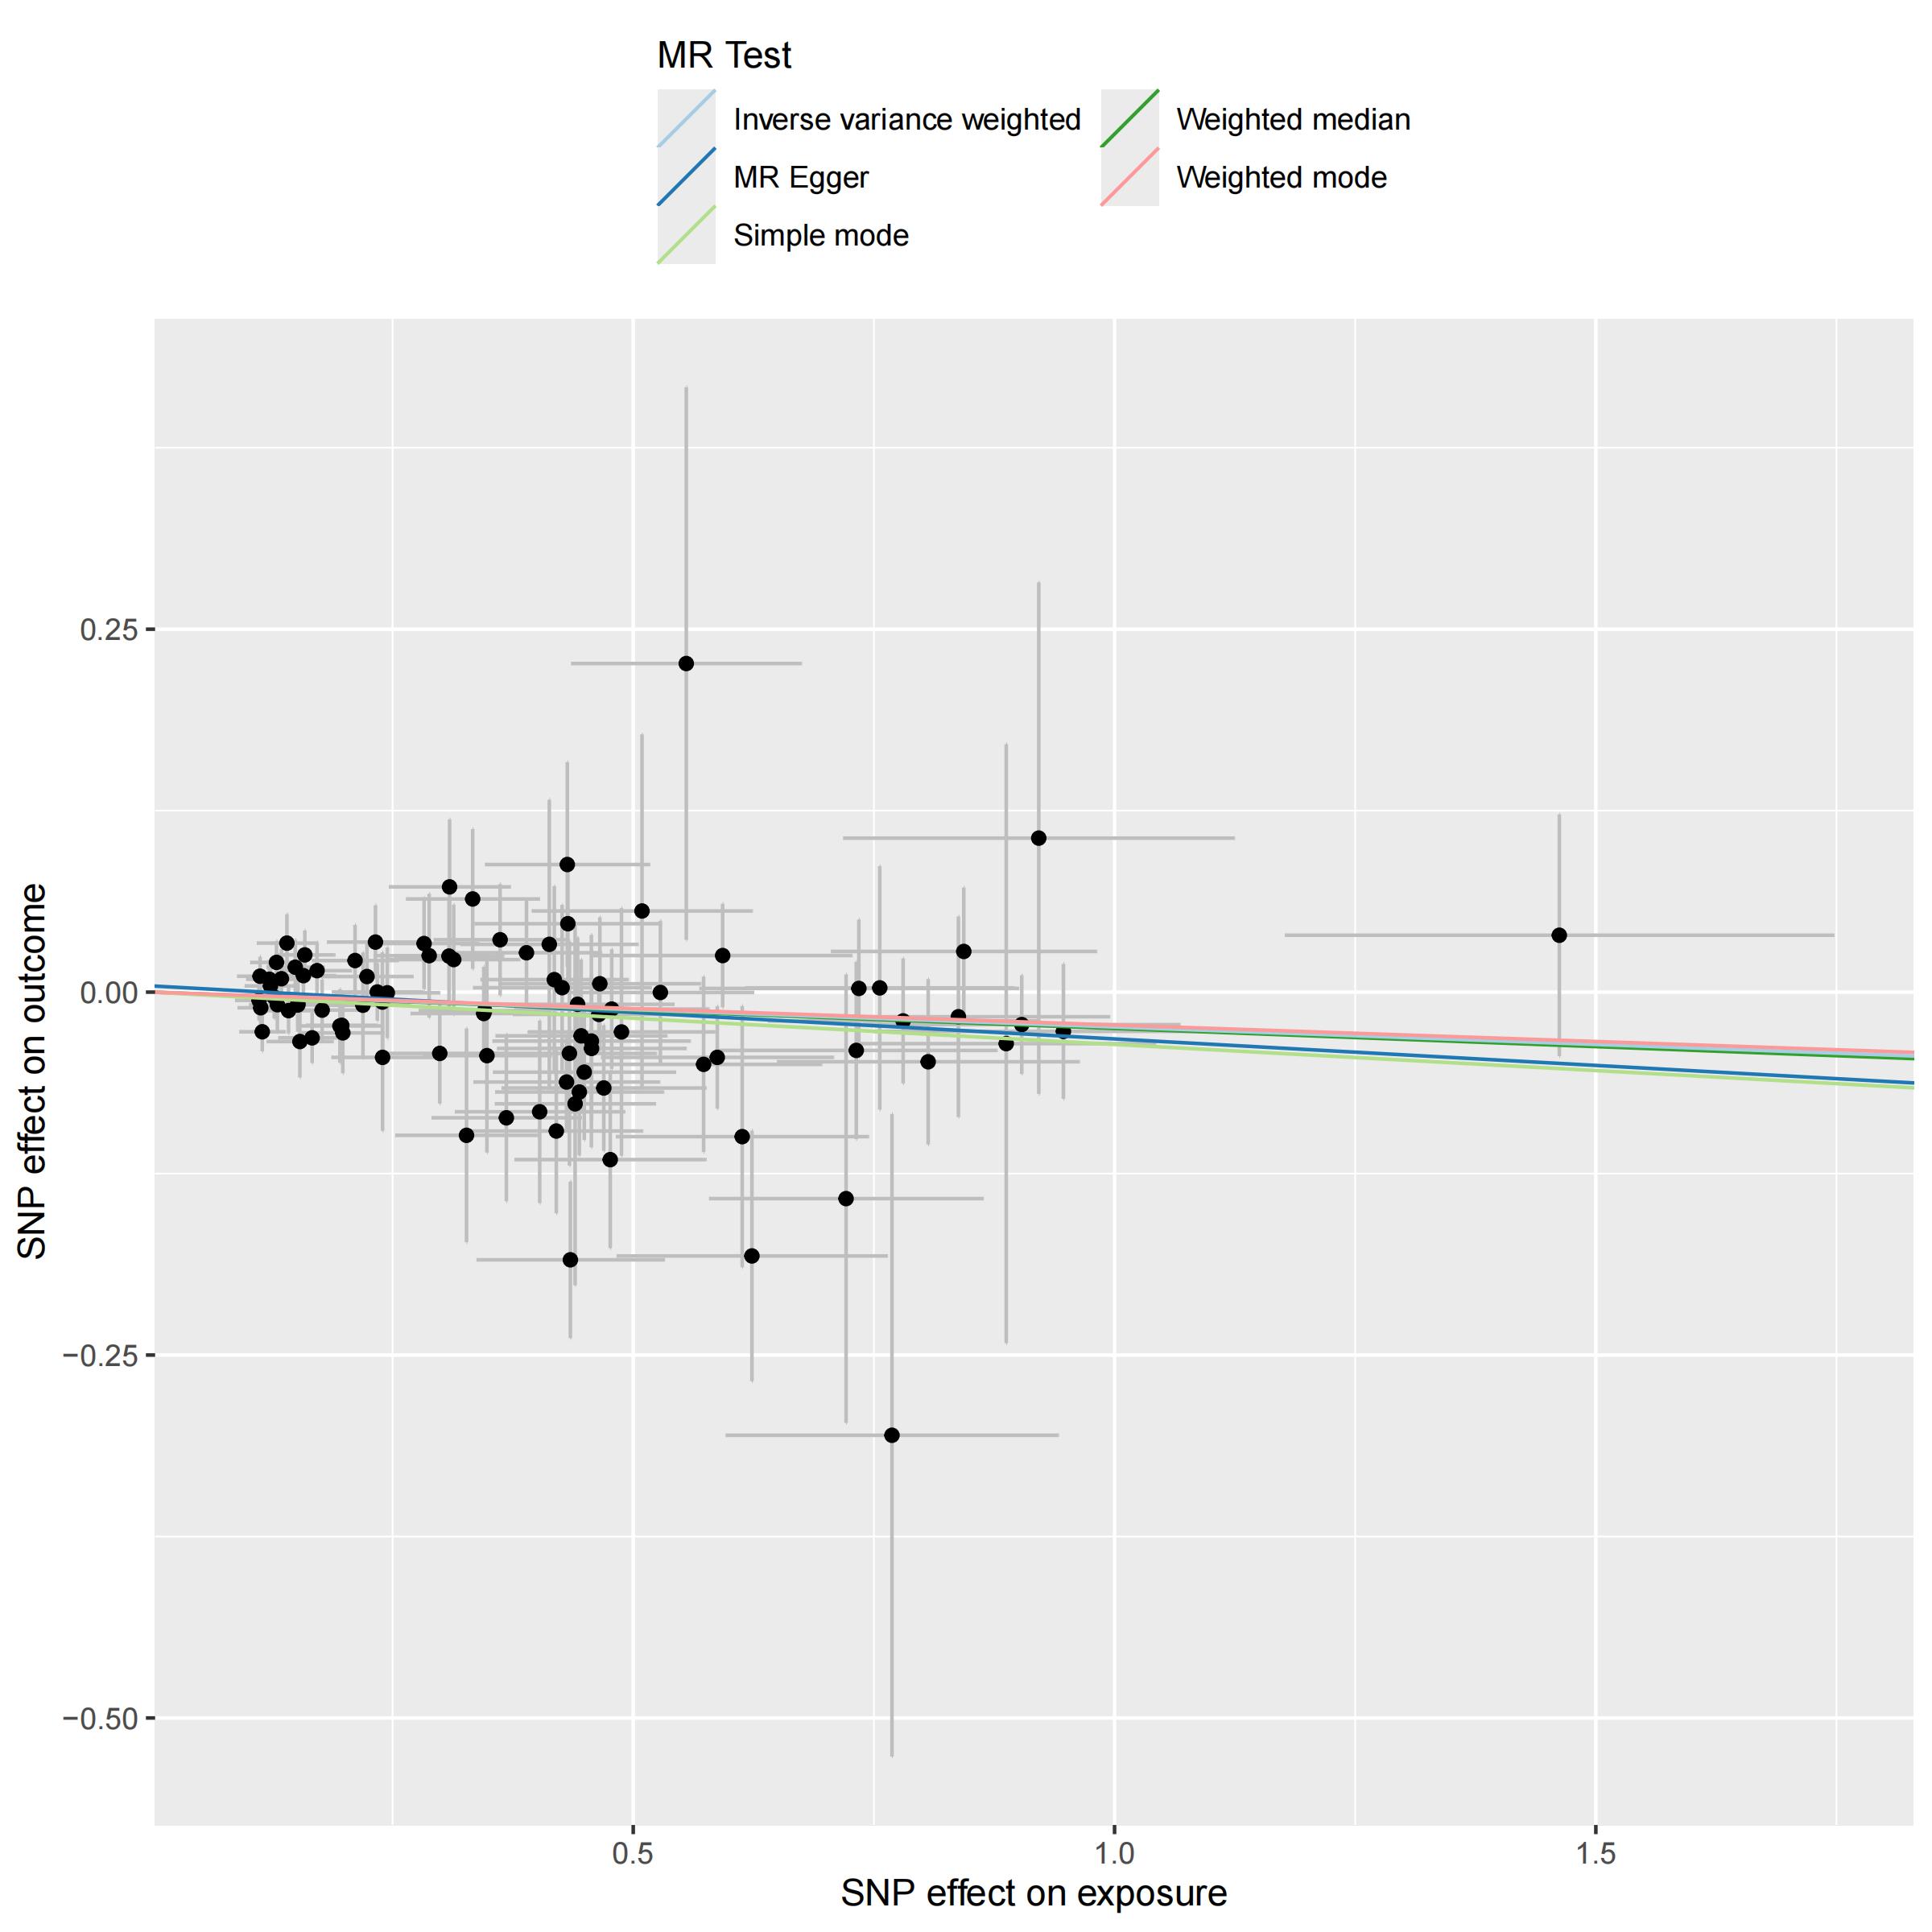

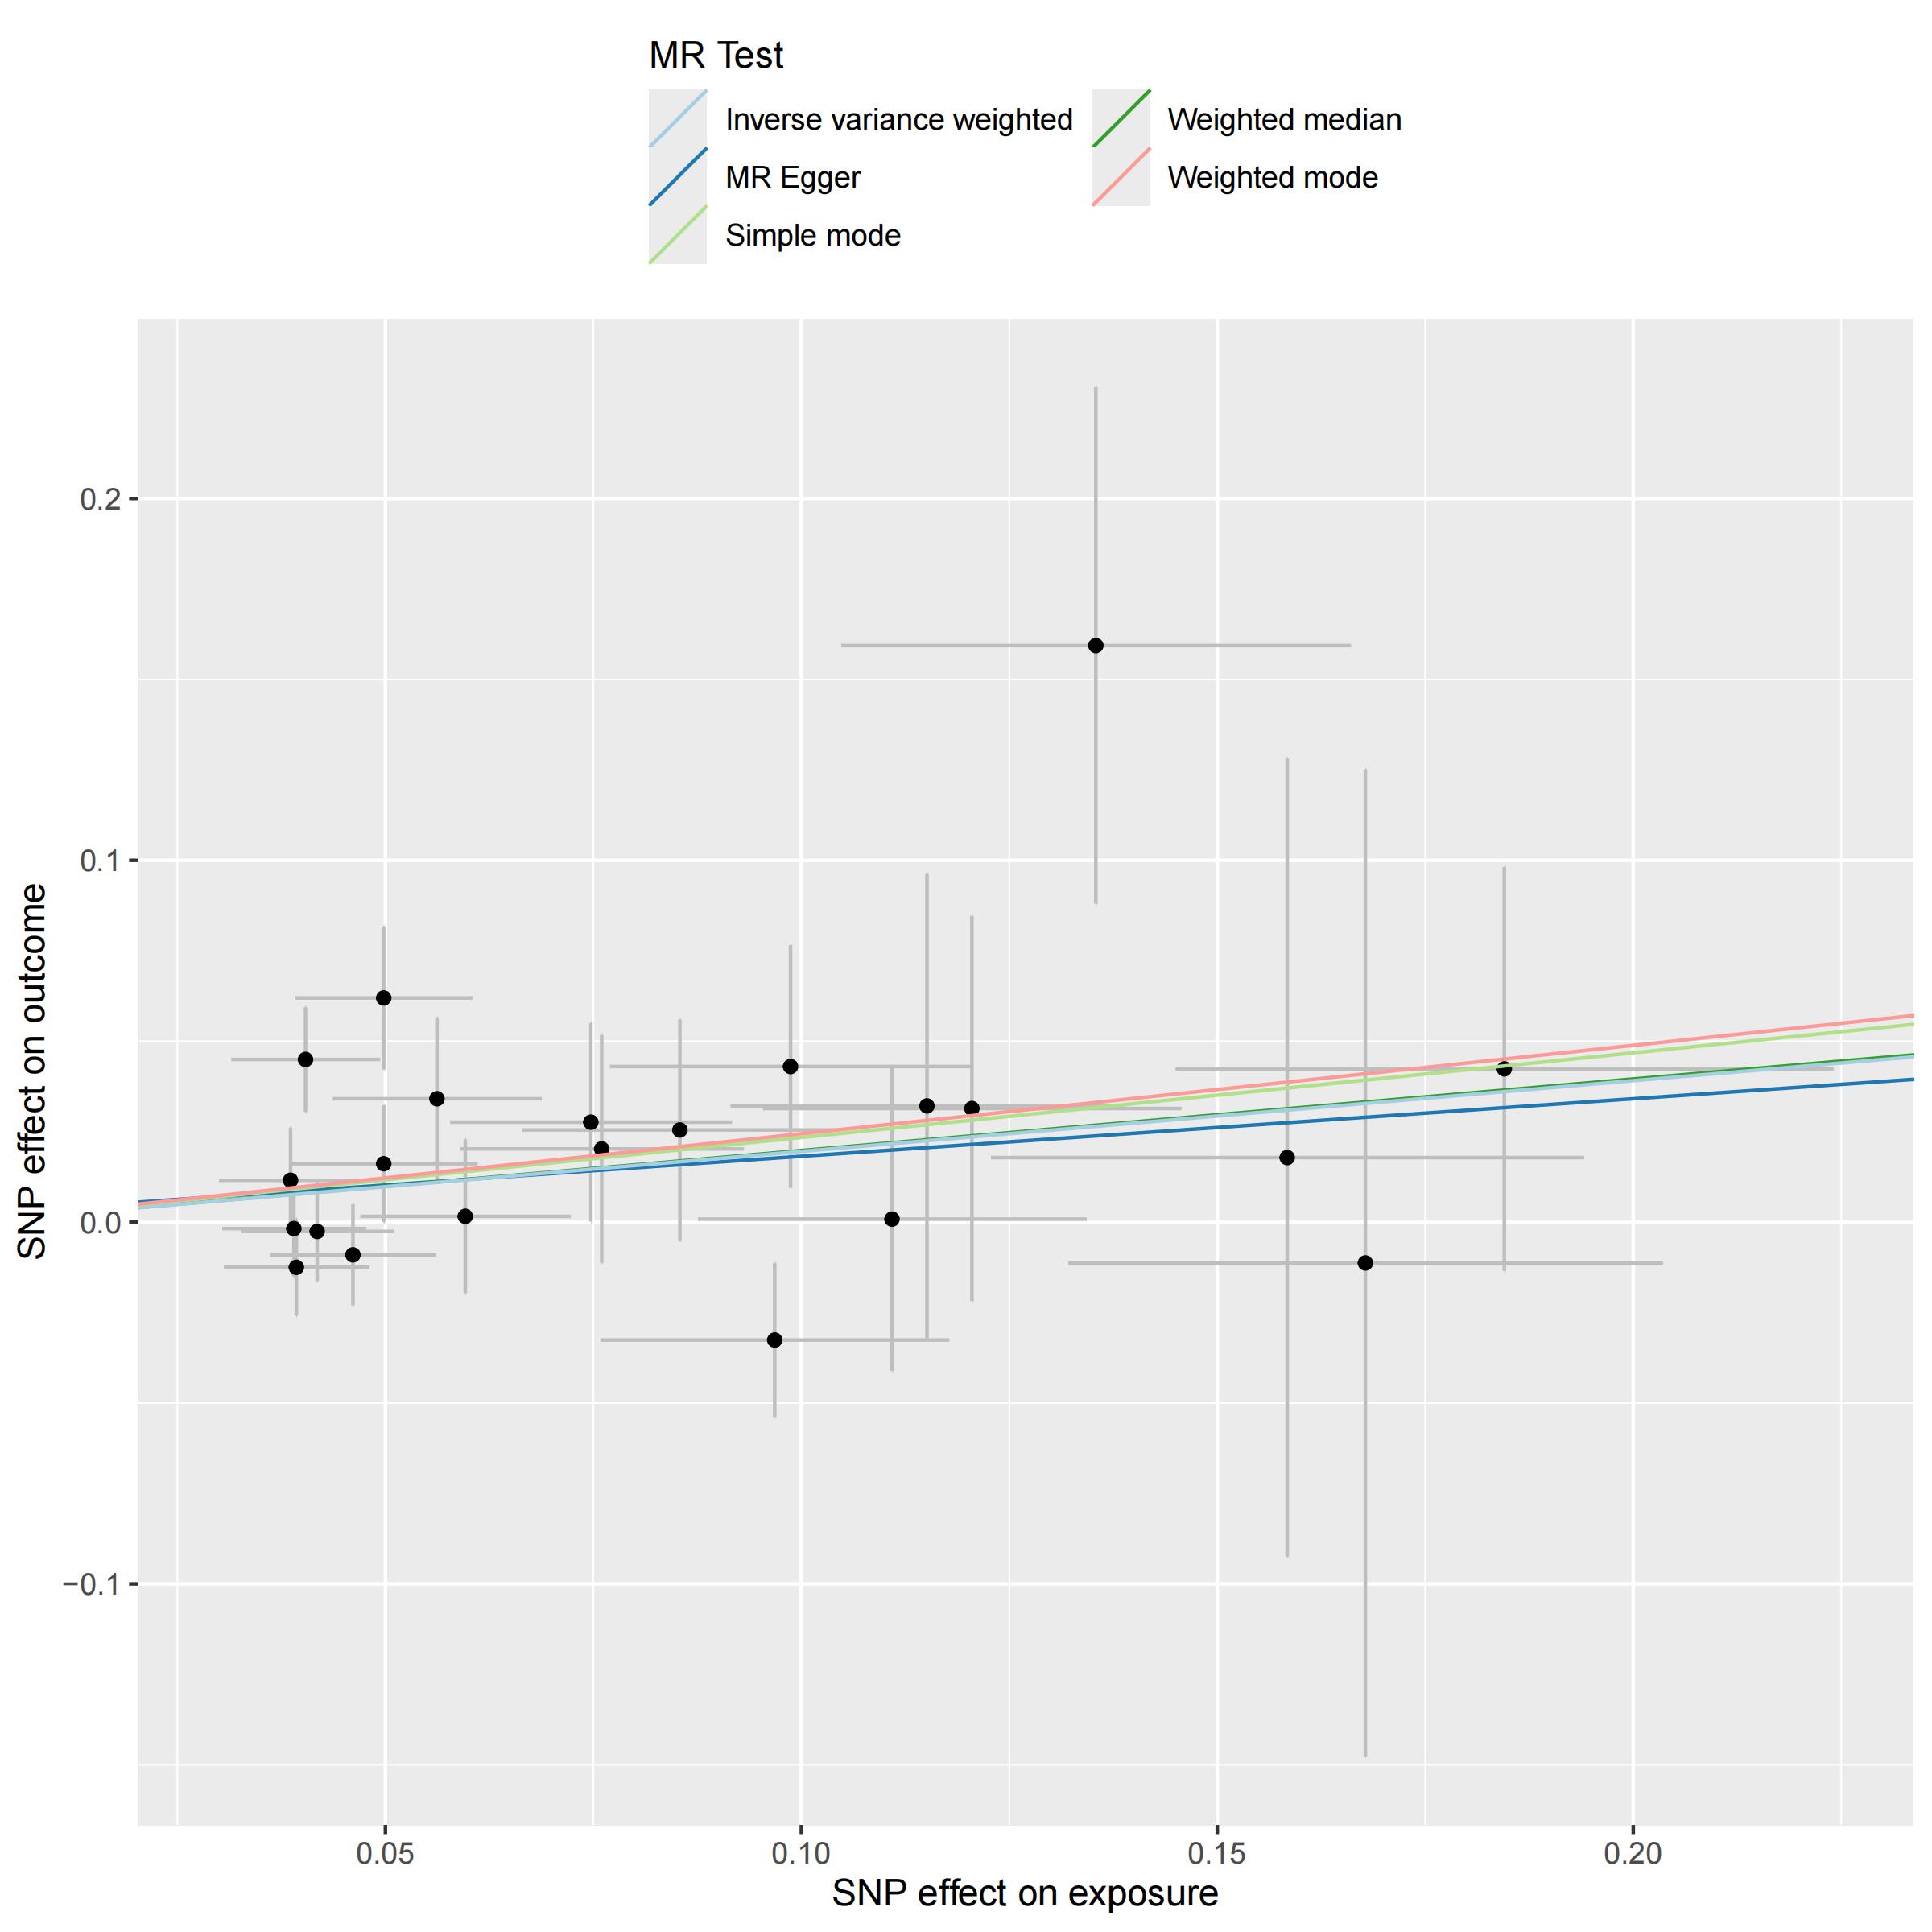


**G**  **H**


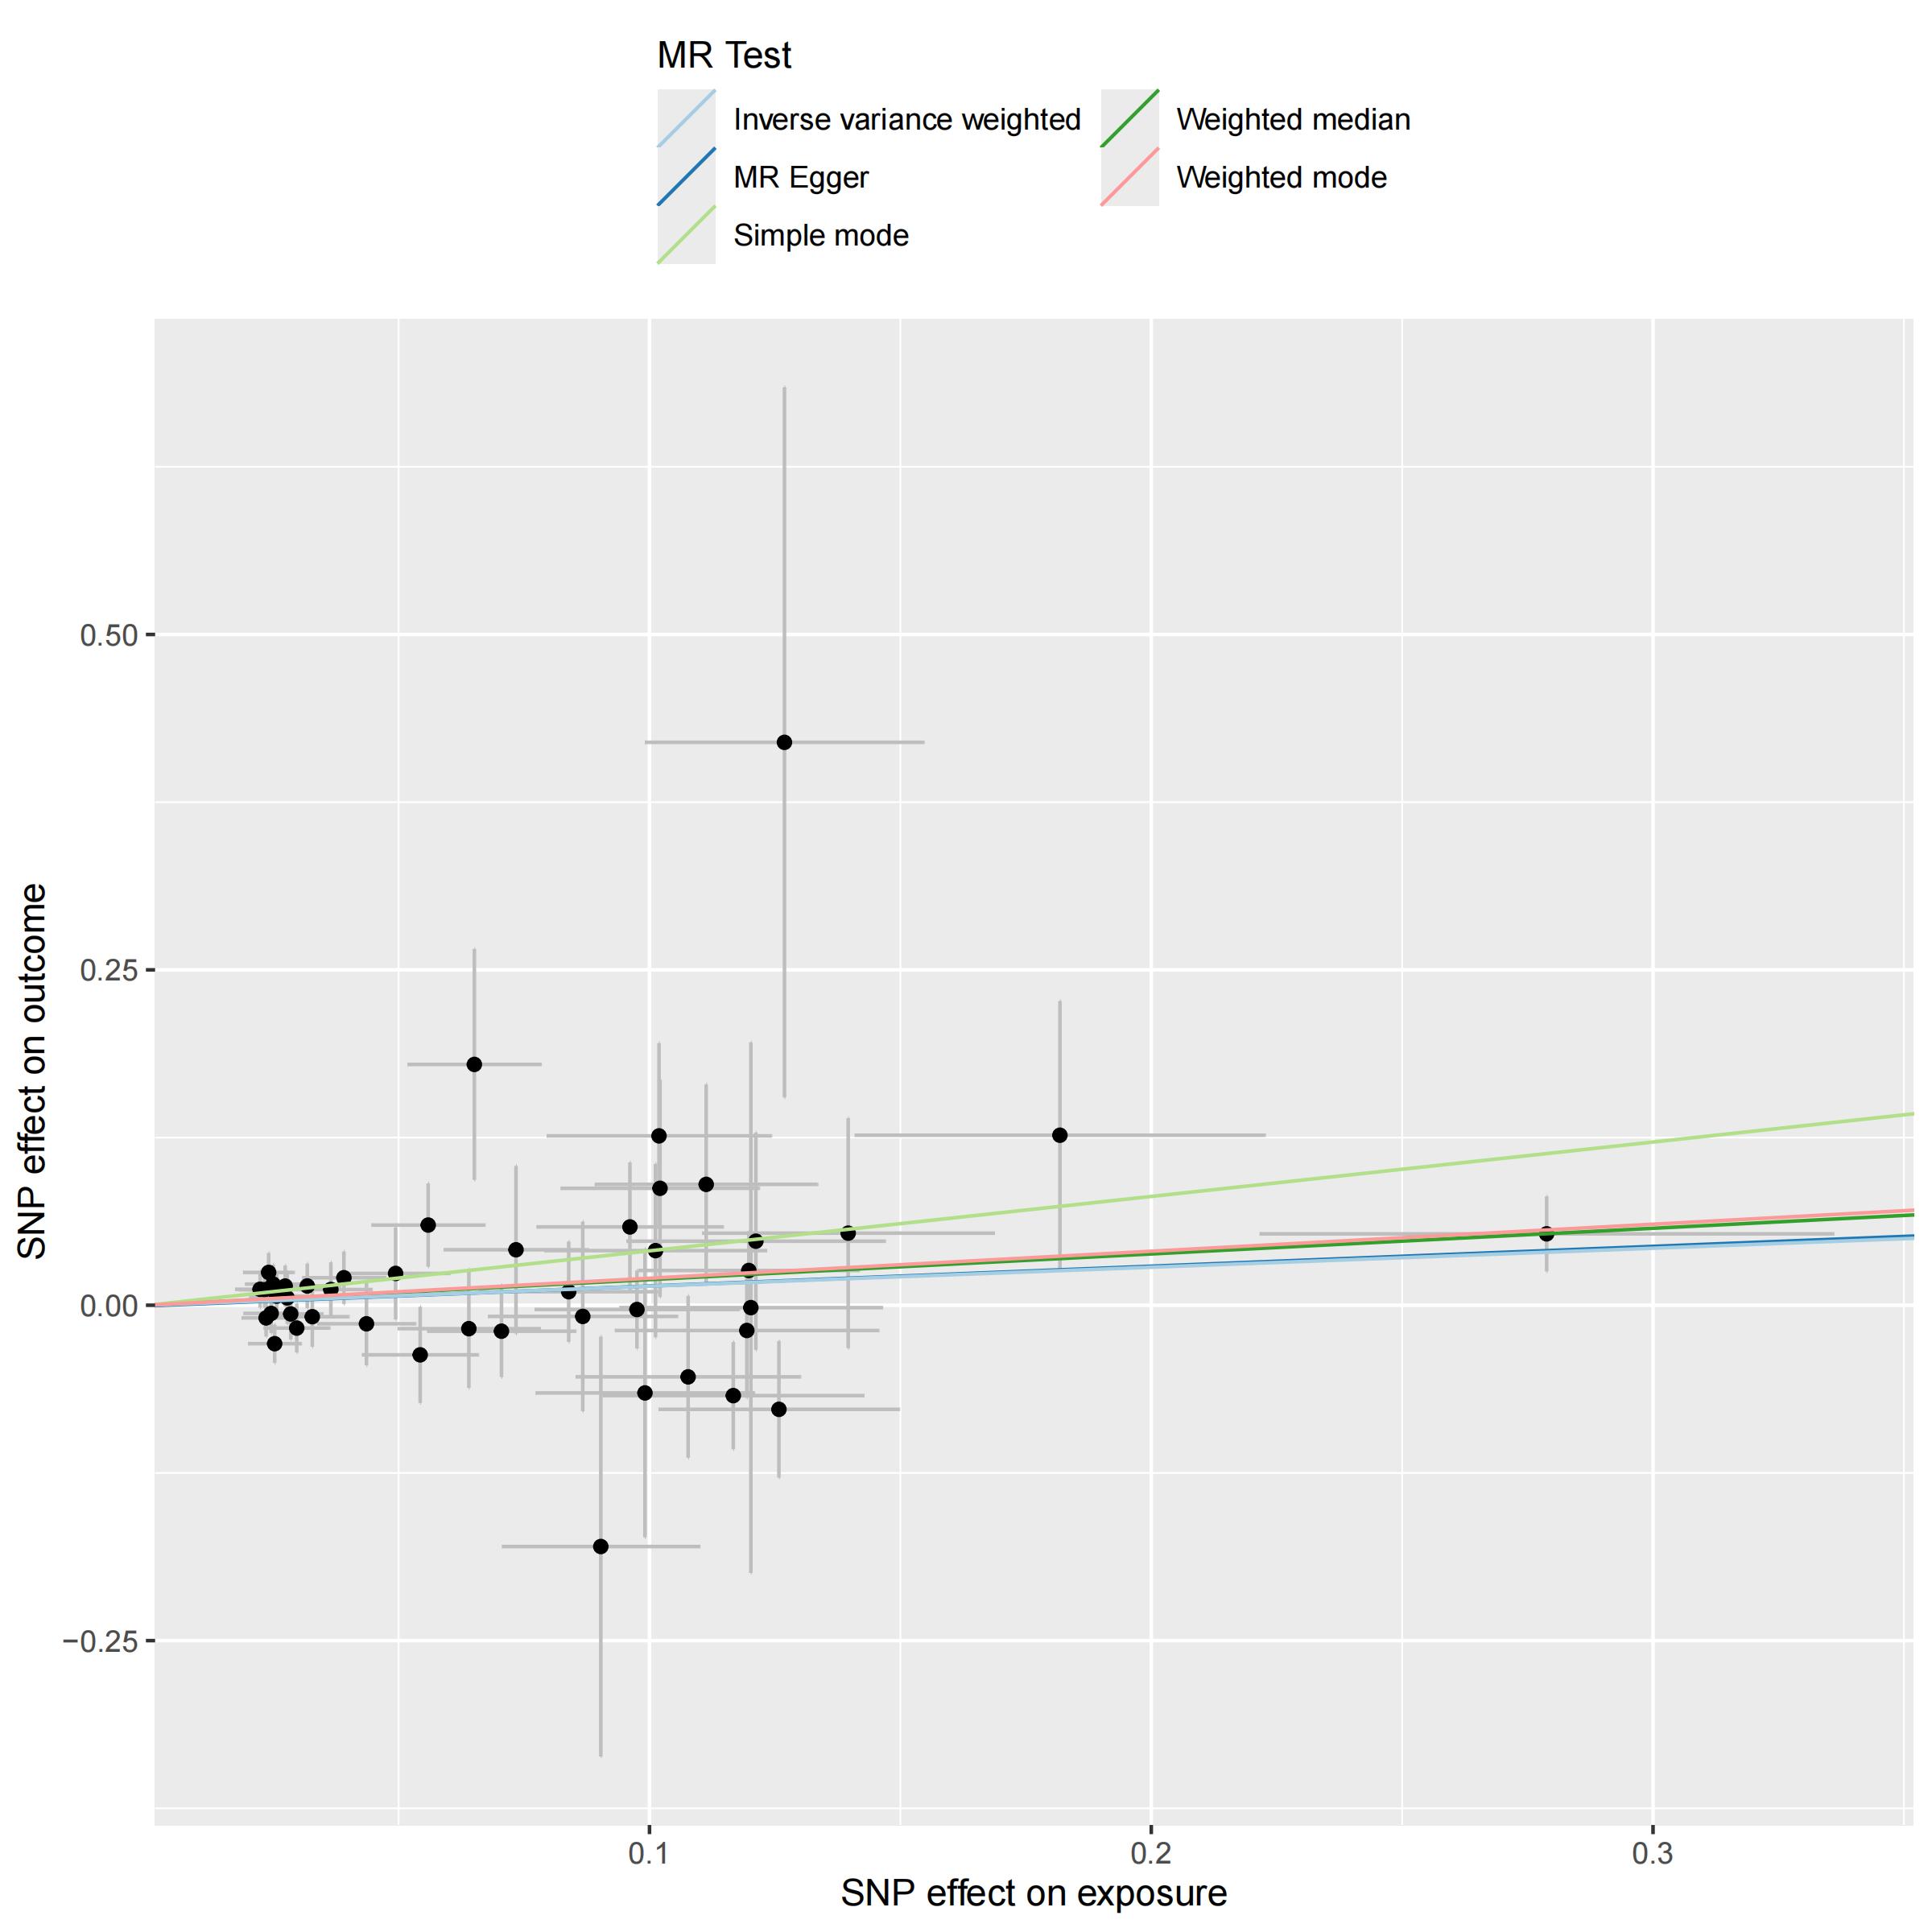

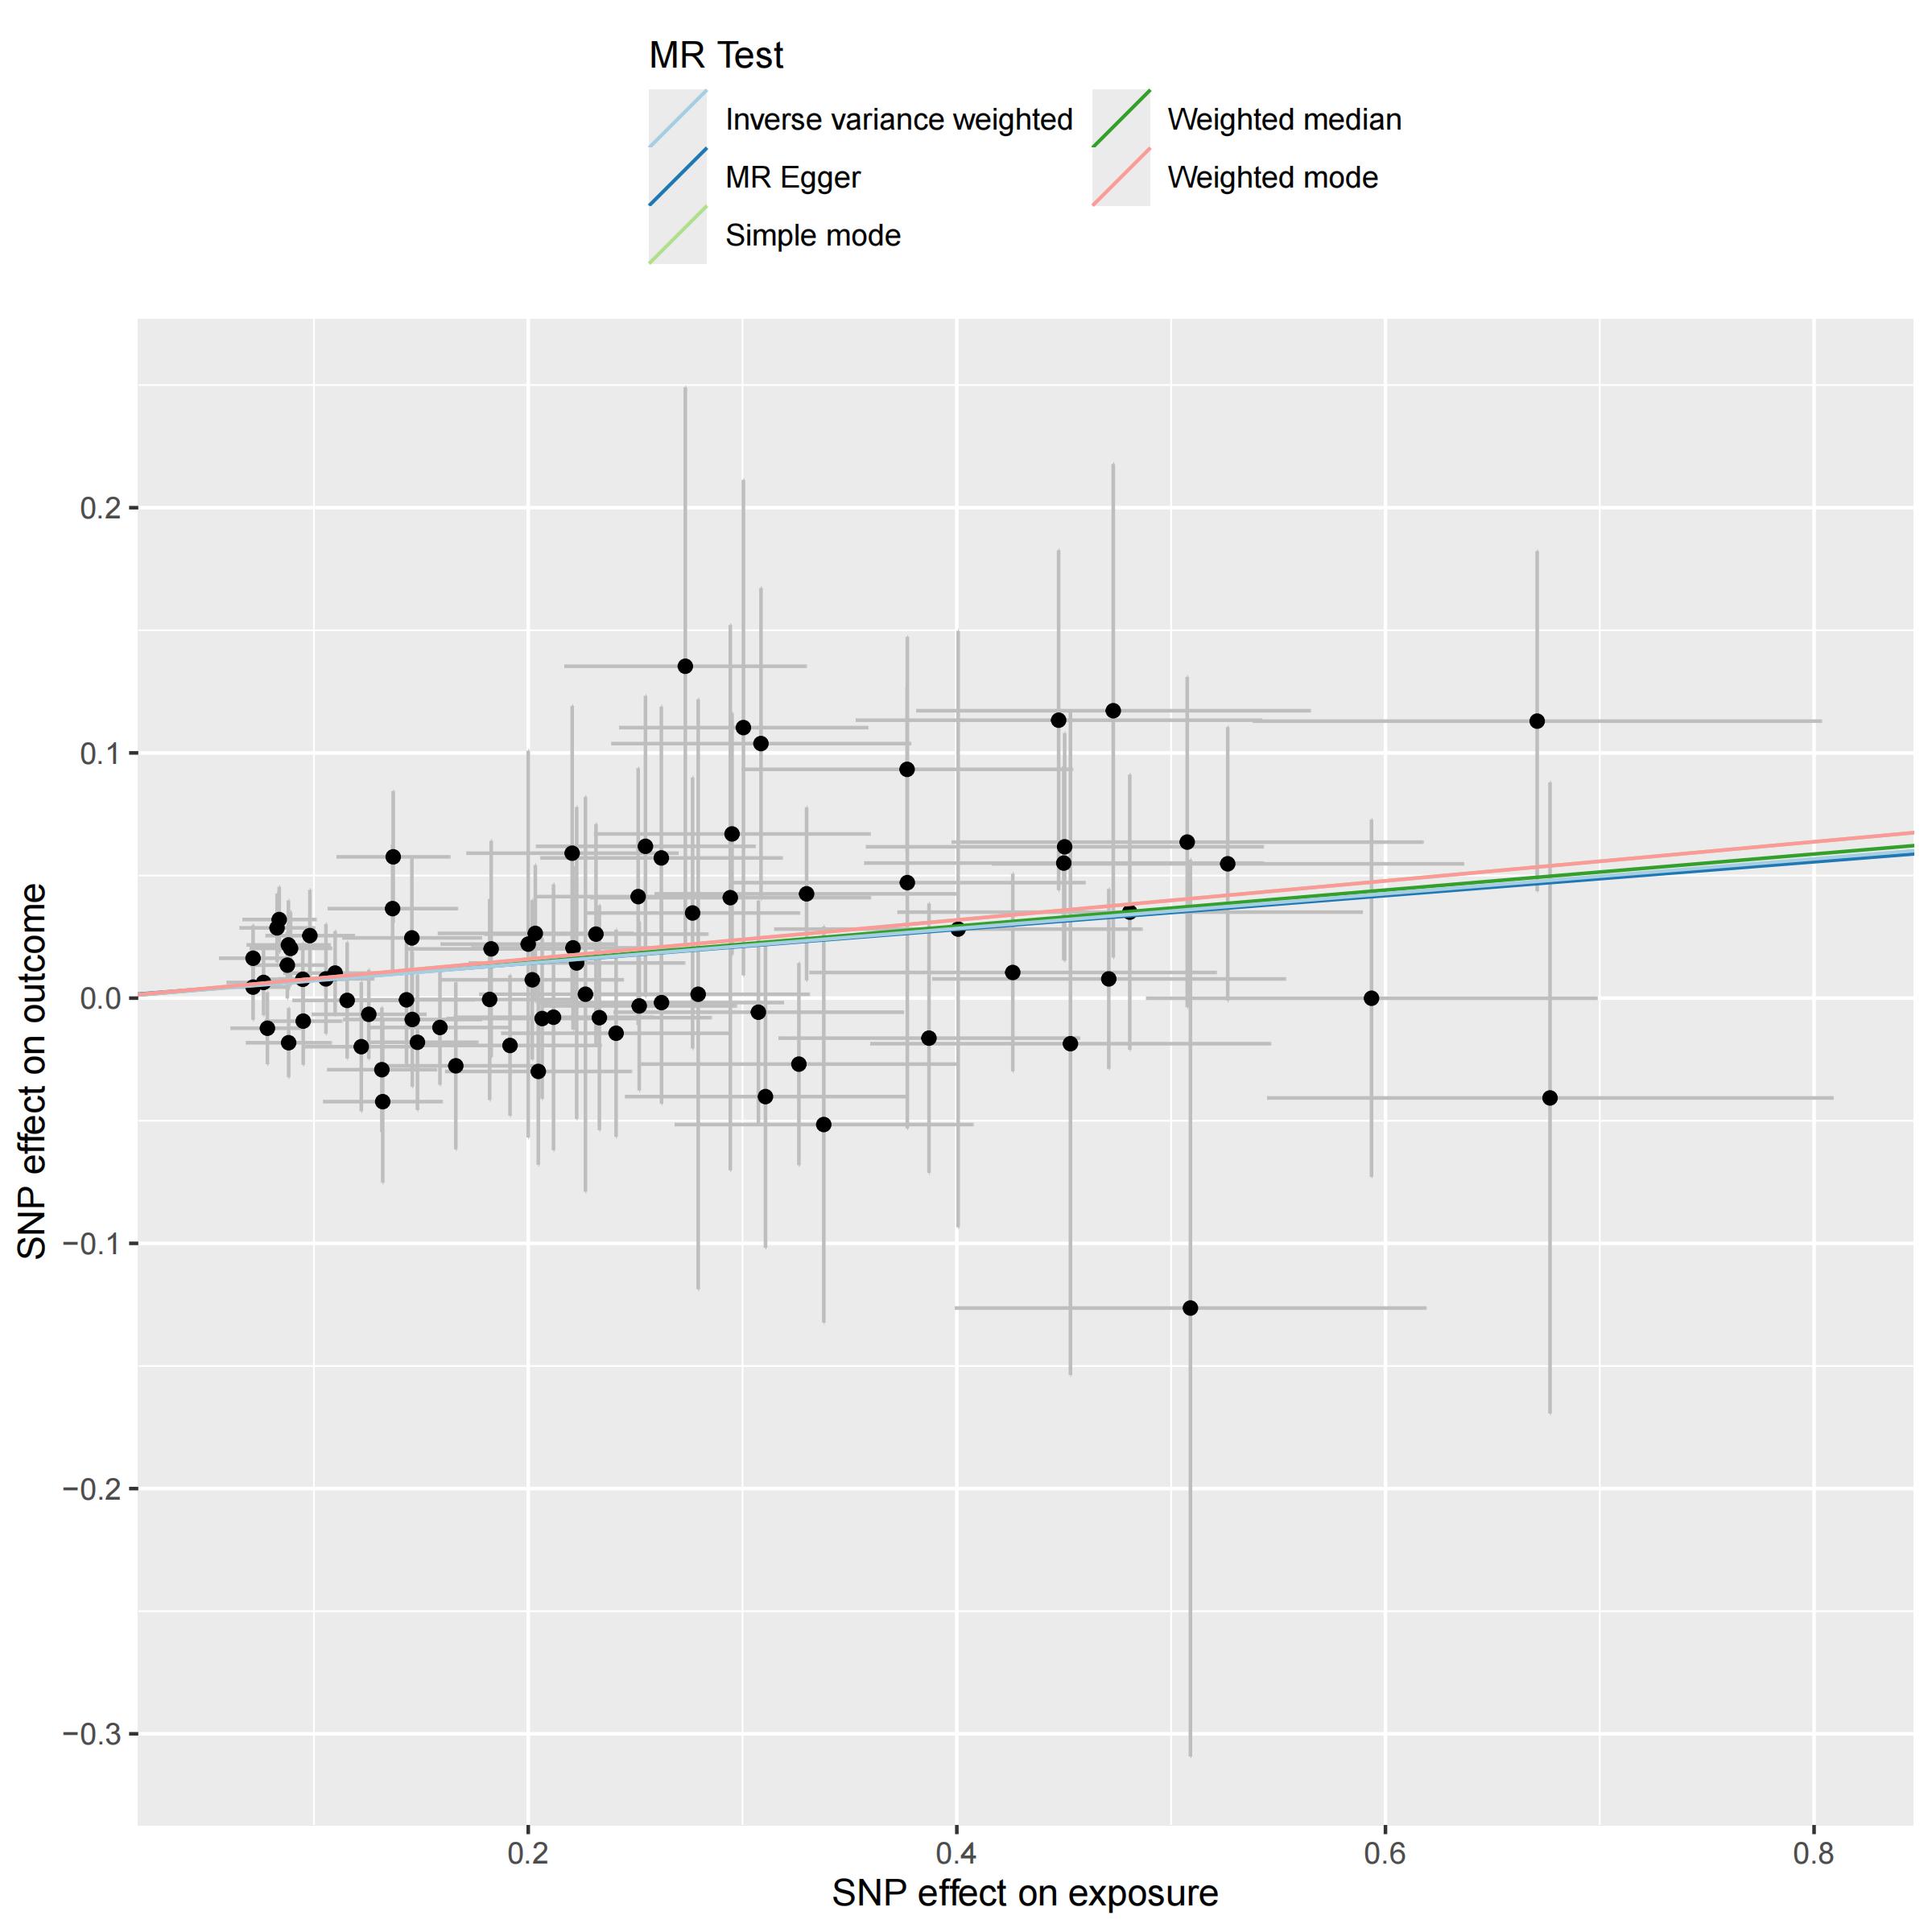


**I J**


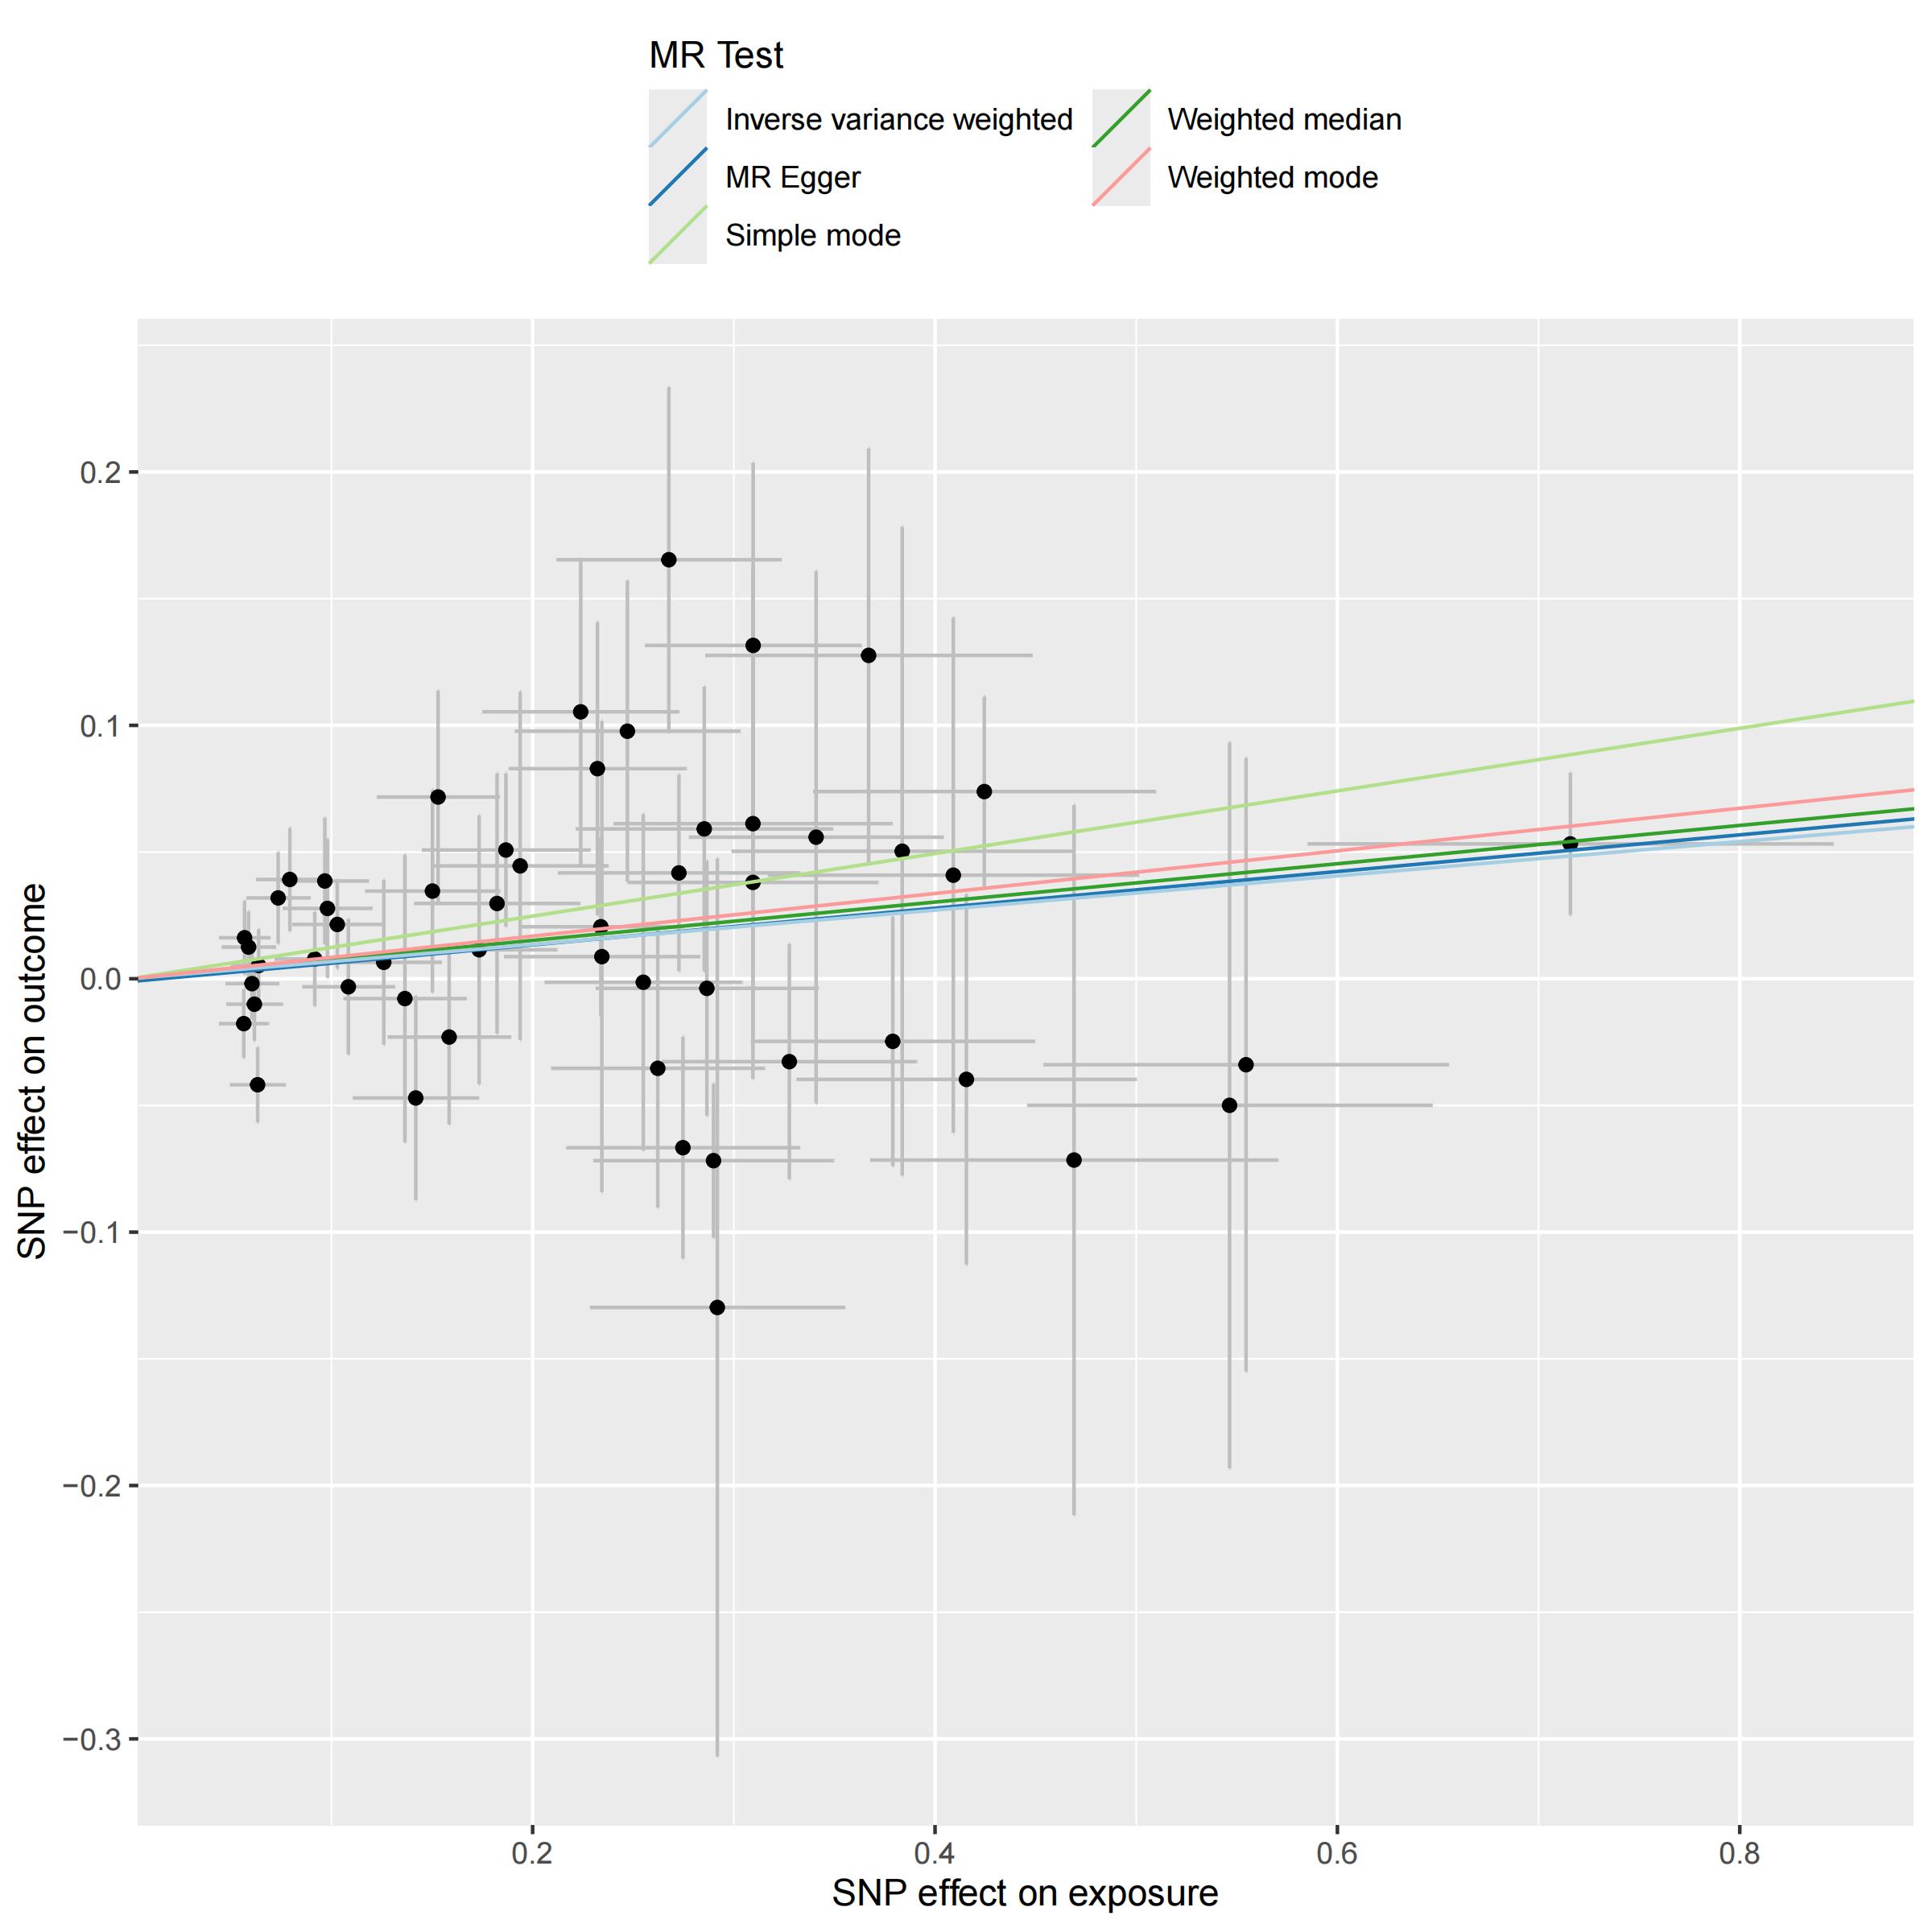

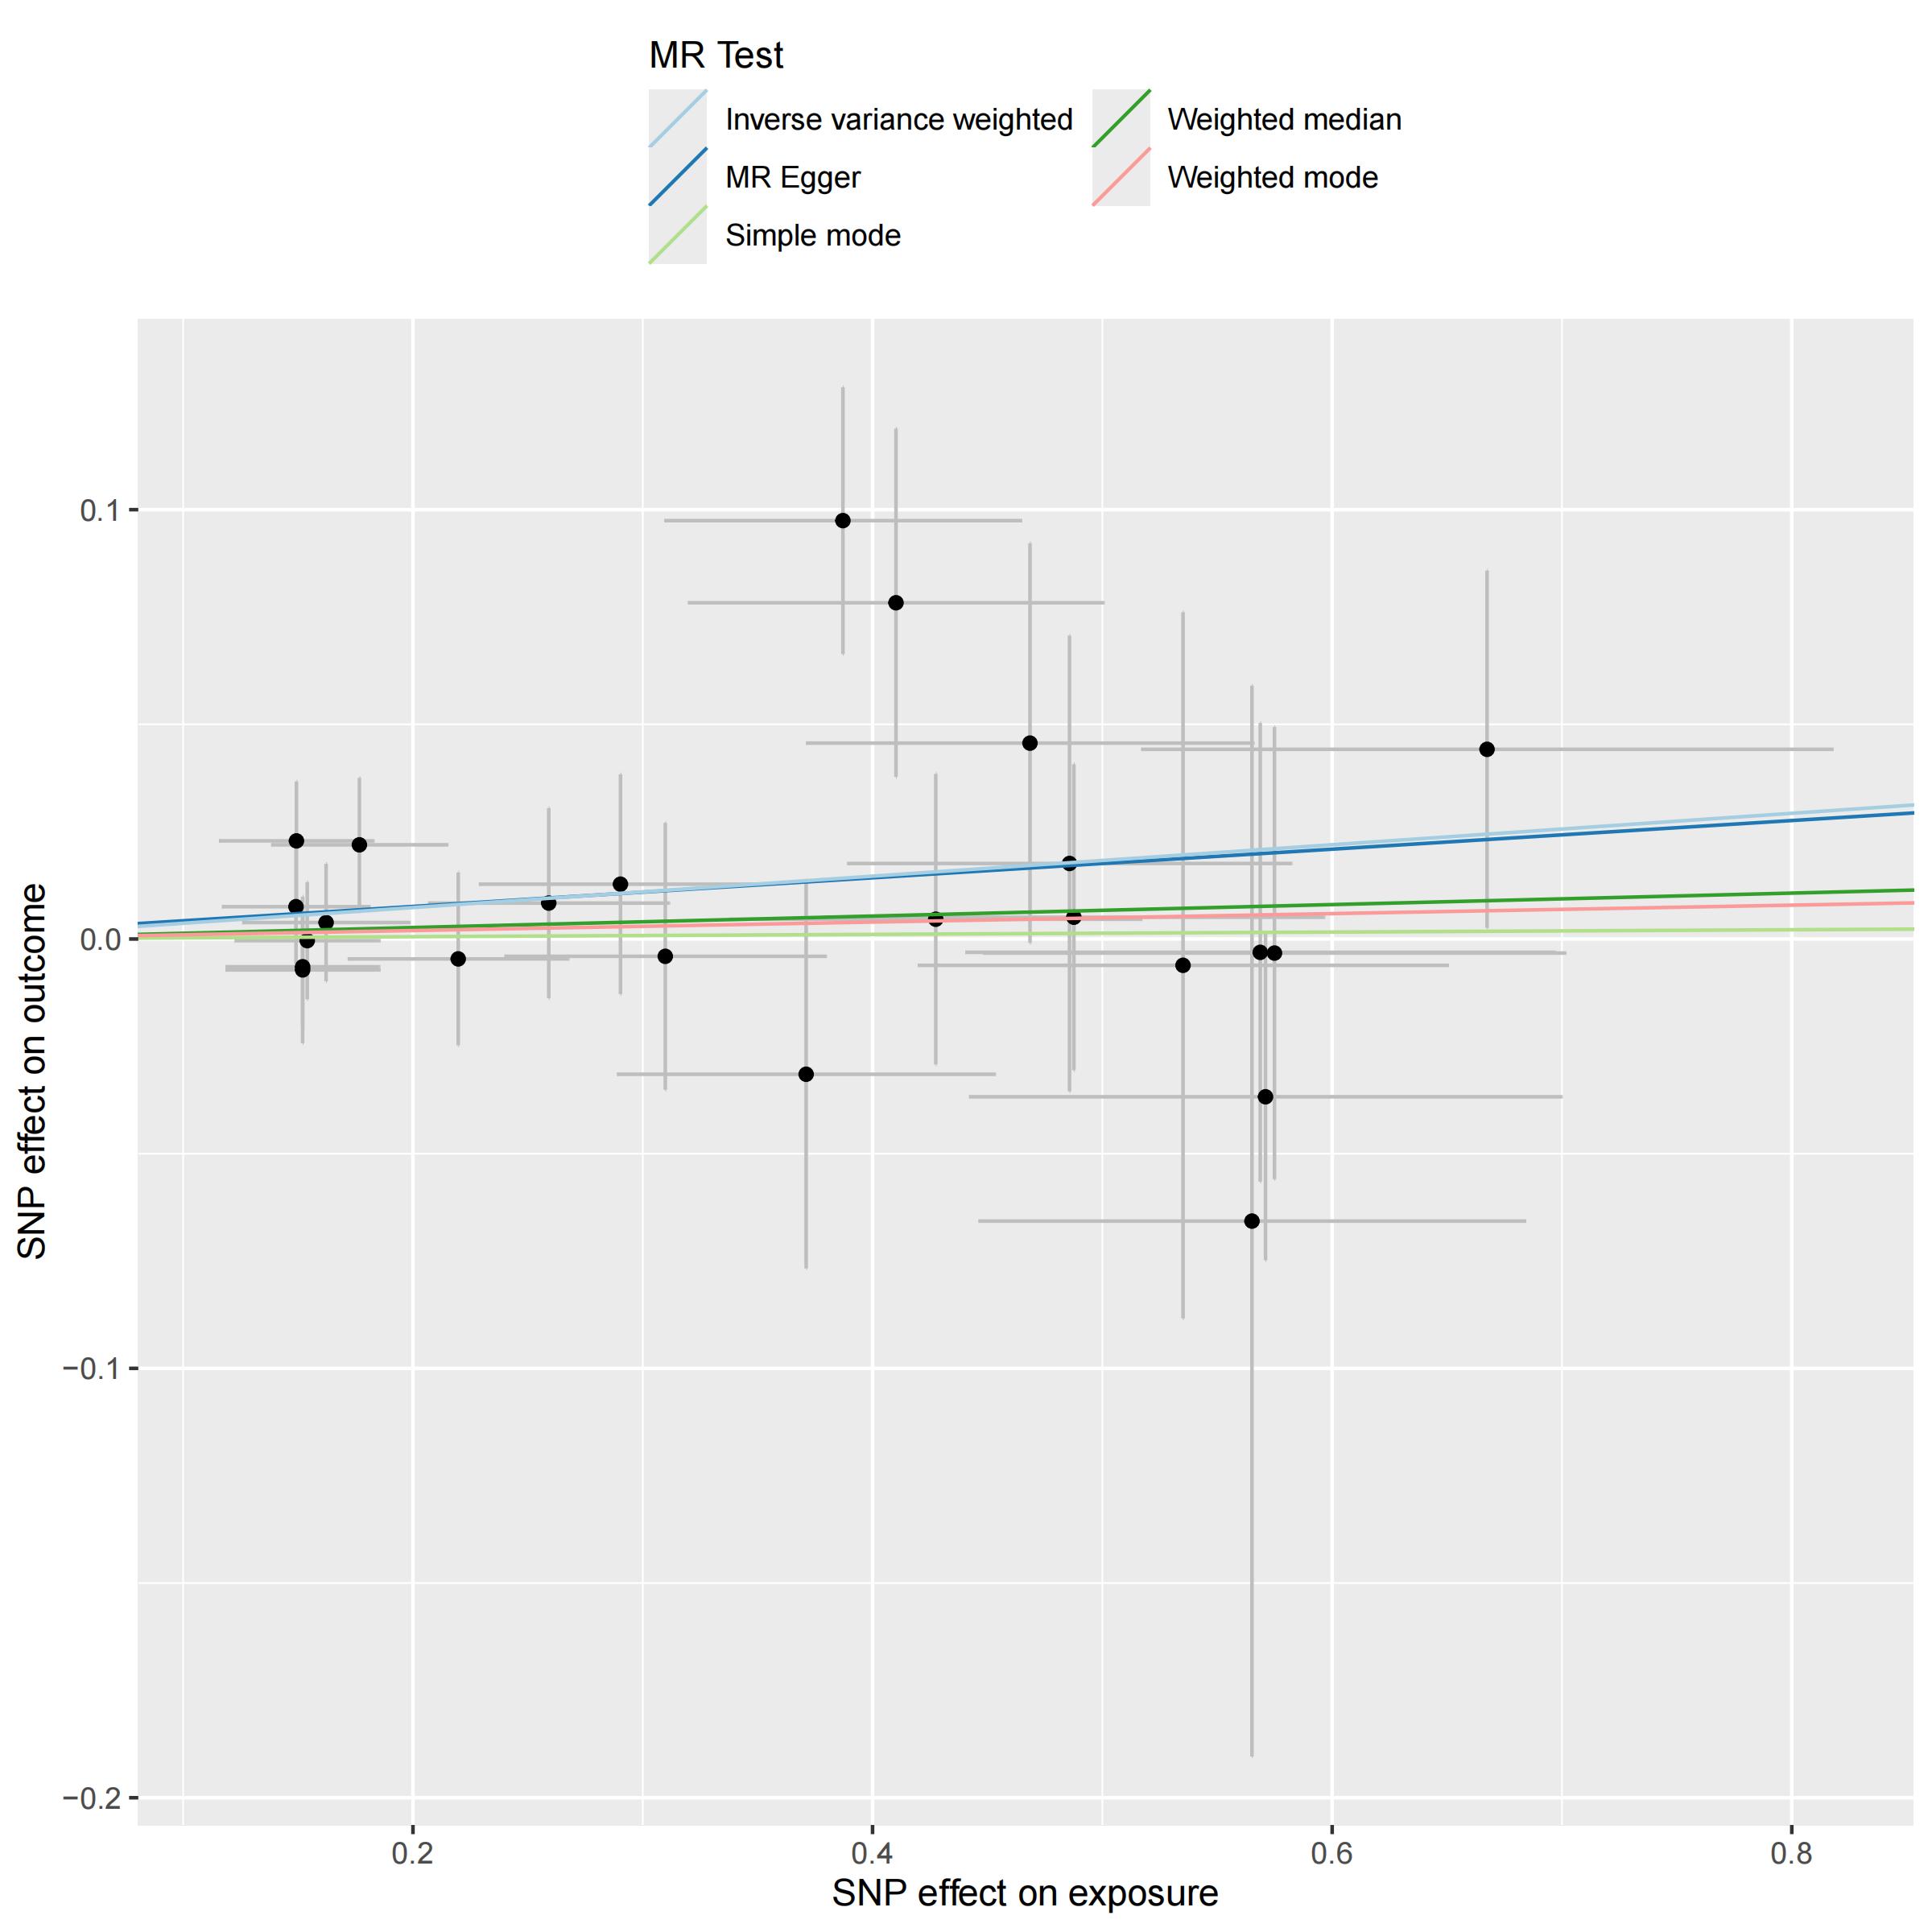


**Figure S1: Scatter Plot of MR Results**A scatter plot depicting the genetic correlations between CSF metabolites and PPD using various MR methods is presented. The x-axis indicates the effect of individual SNPs on CSF metabolites, while the y-axis shows their effect on PPD. The slopes of the lines represent the causal effects estimated by each respective method. A x-axis shows Guanosine levels; B x-axis shows Argininosuccinate levels; C x-axis shows Maleate levels; D x-axis shows N6-methyllysine levels; E x-axis shows Homocarnosine levels; F x-axis shows N-acetyl-isoputreanine levels; G x-axis shows Glucose levels; H x-axis shows Benzoate levels; I x-axis shows Gluconate levels; J x-axis shows Arachidonate (20:4n6) levels.

**A**   **B**


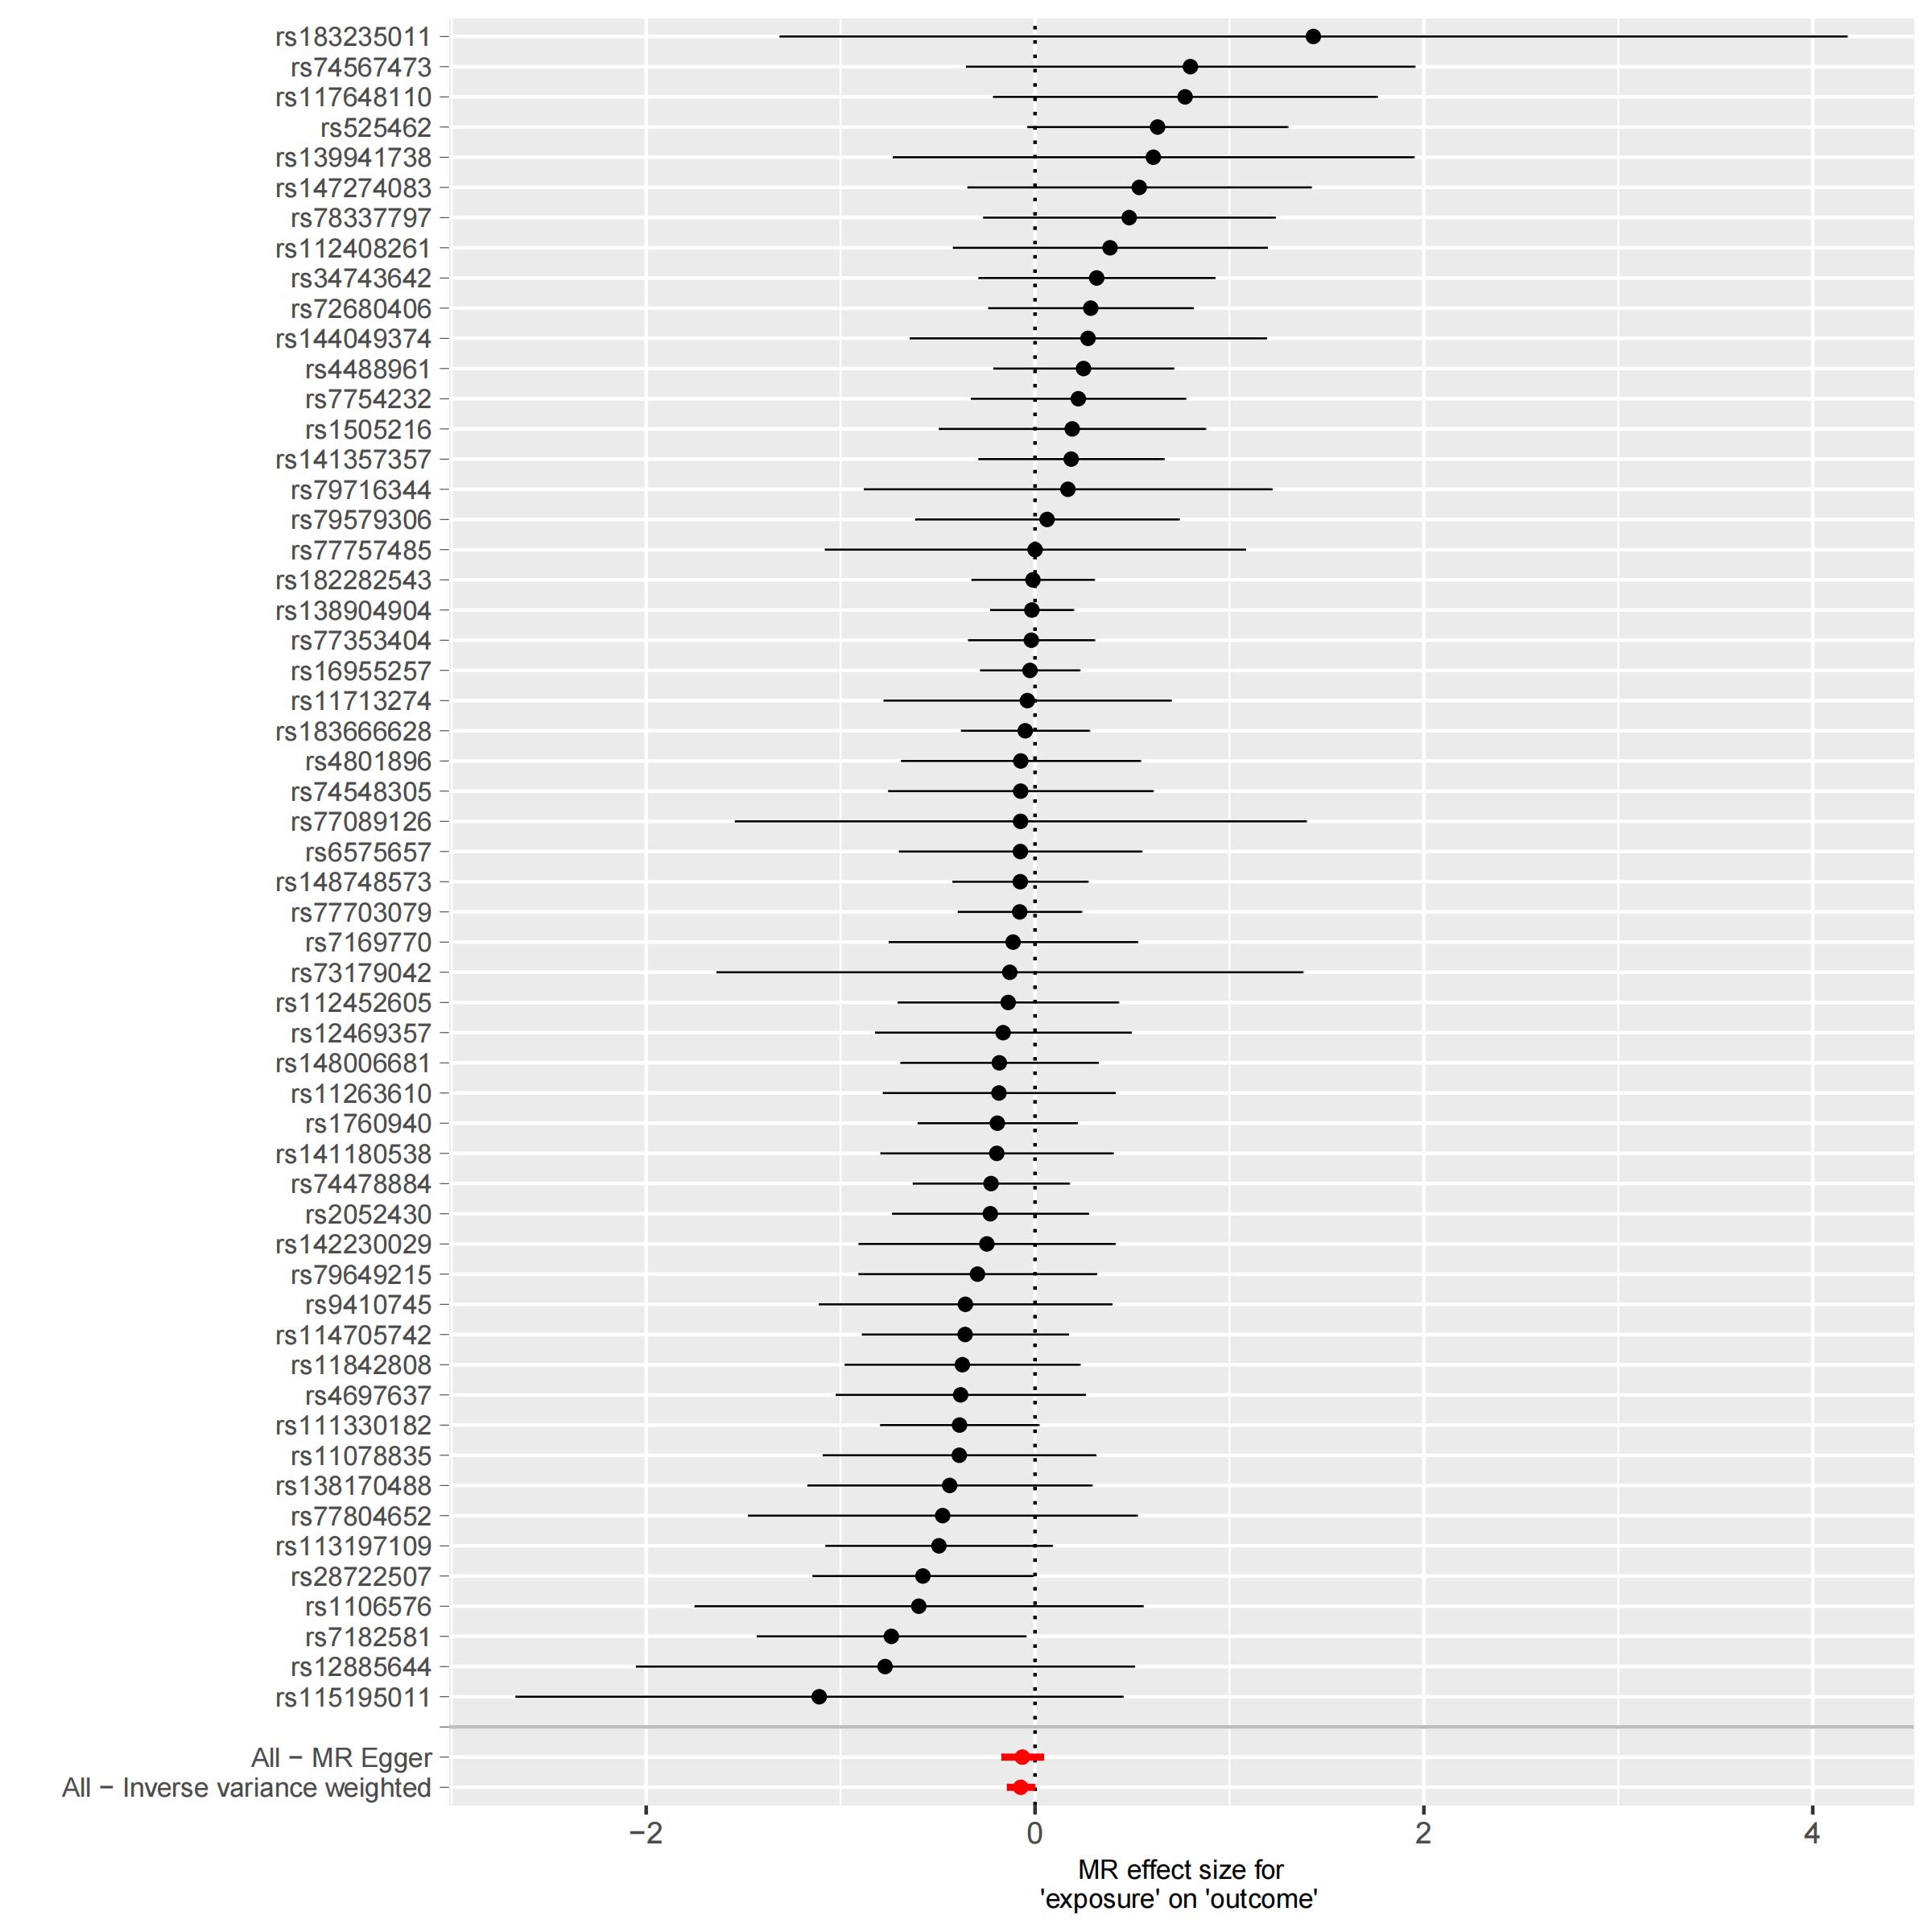

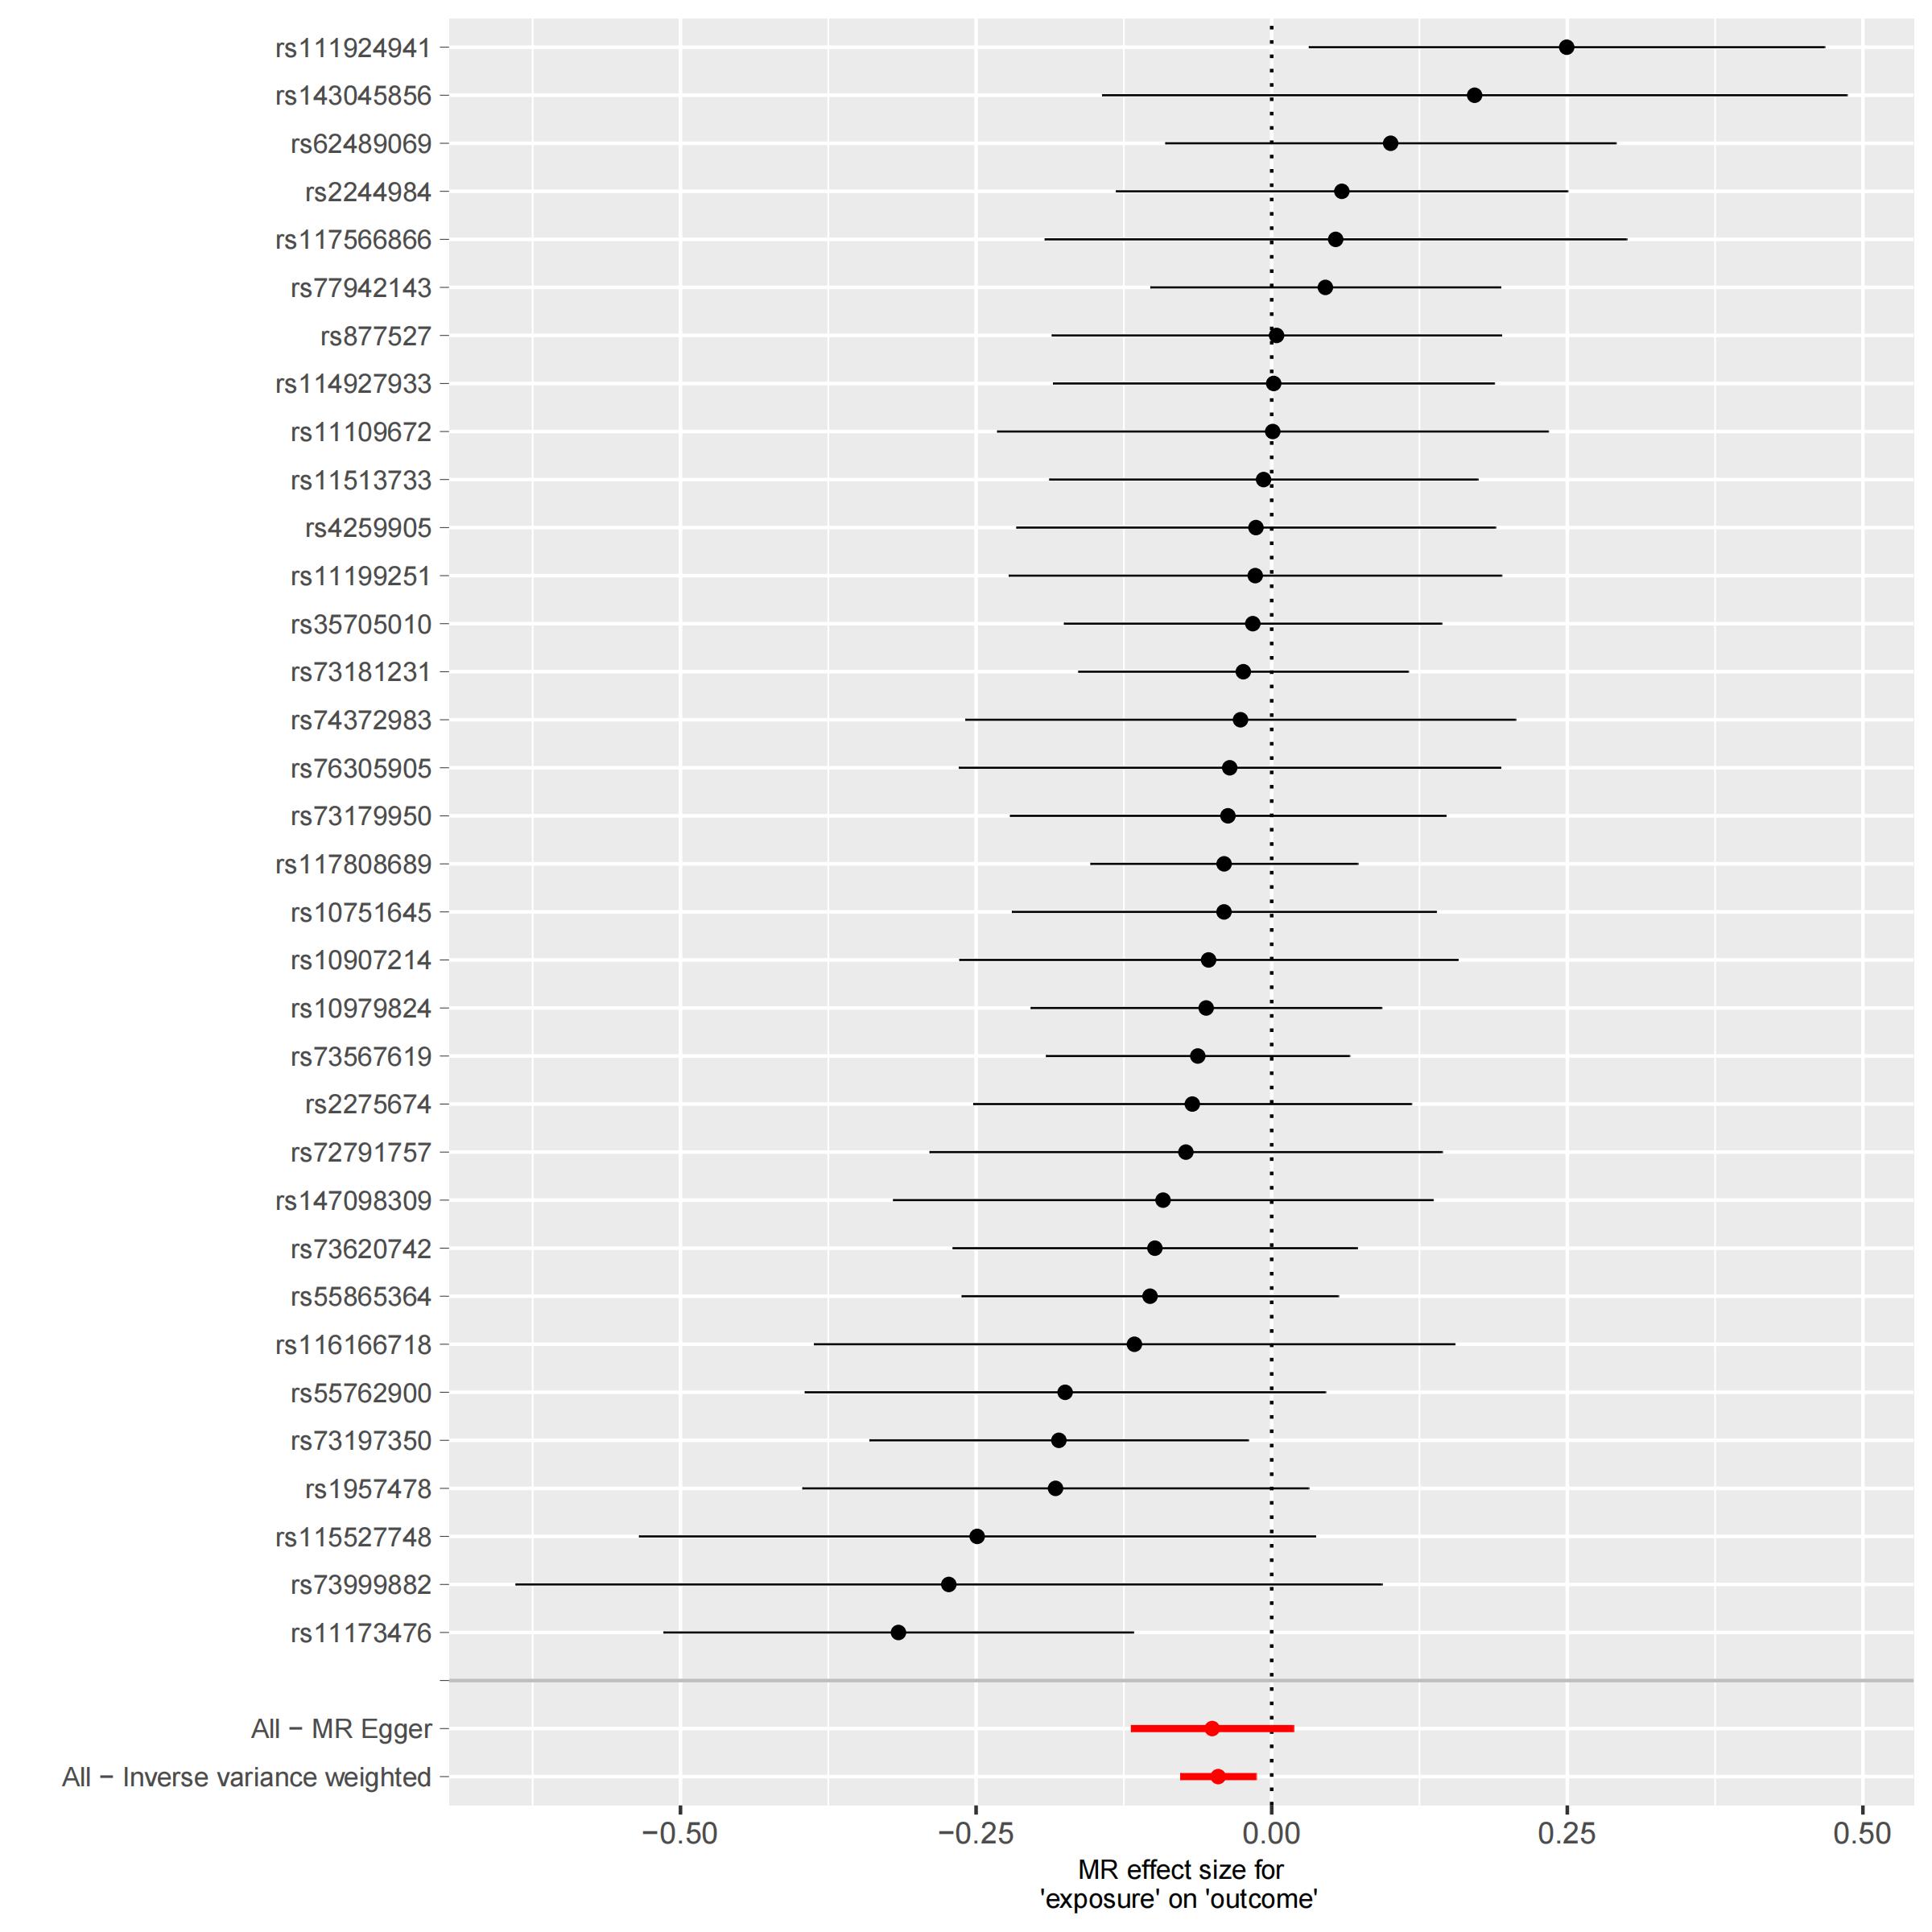


**C**  **D**


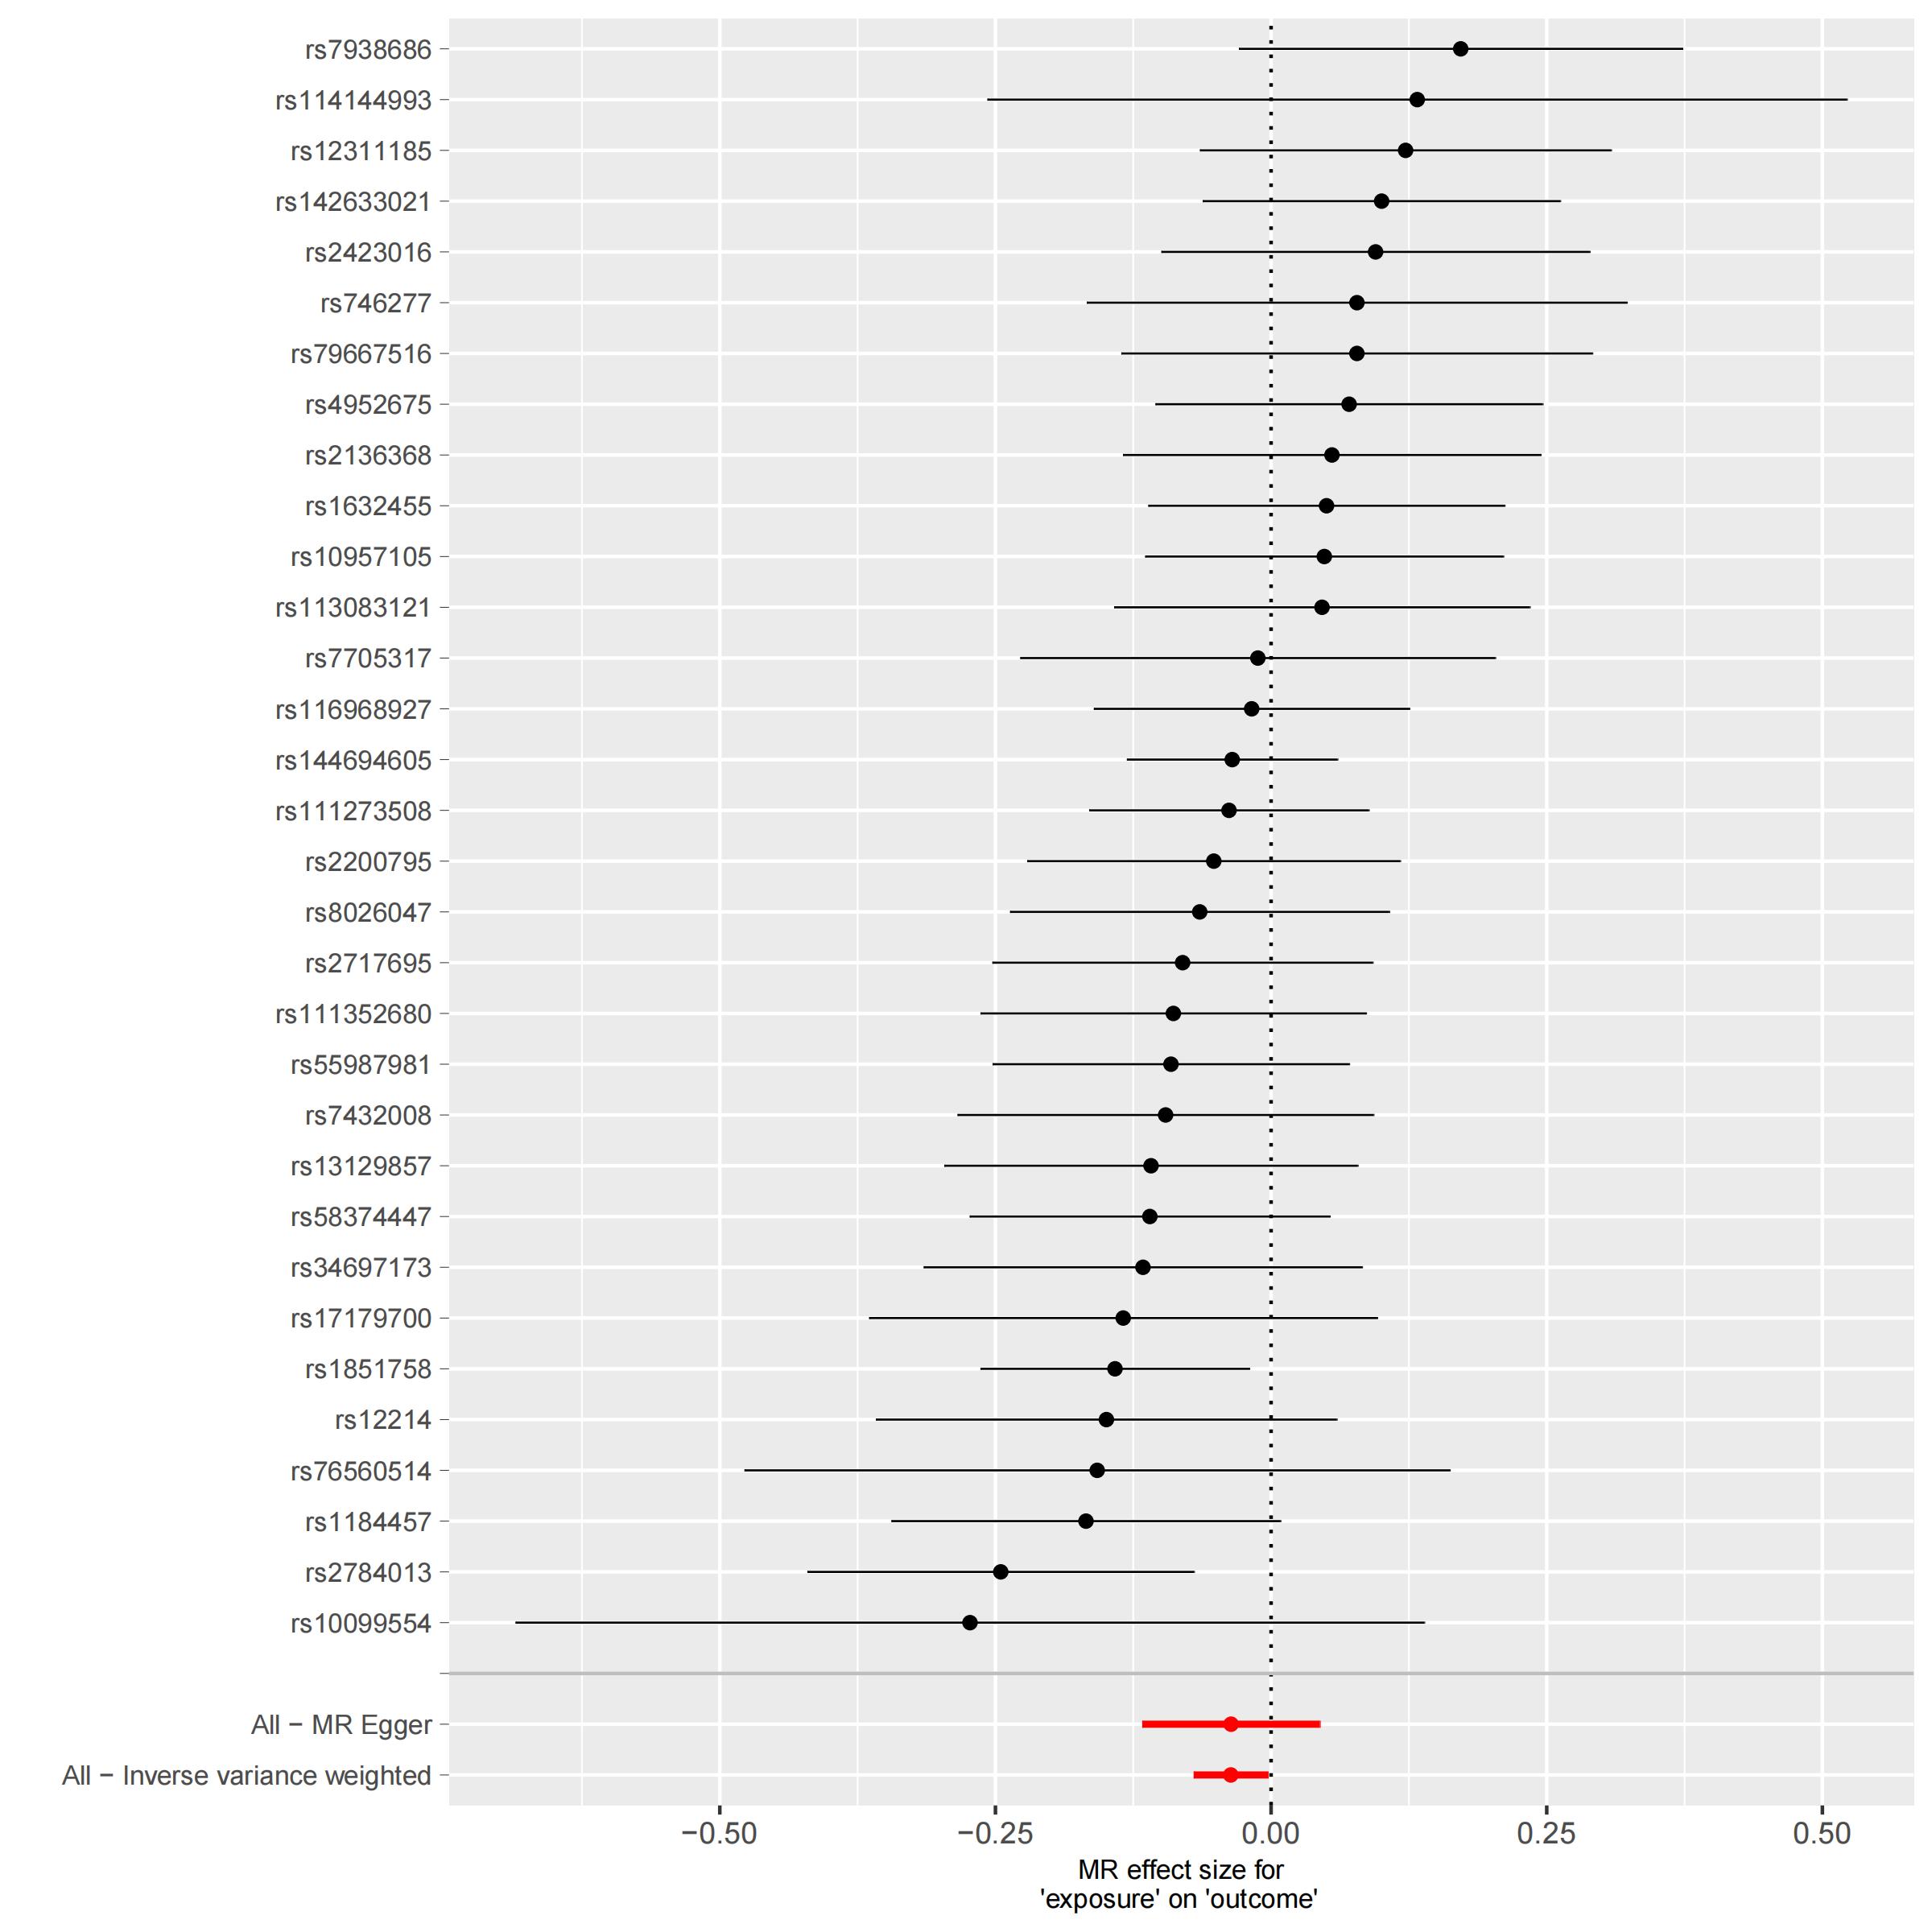

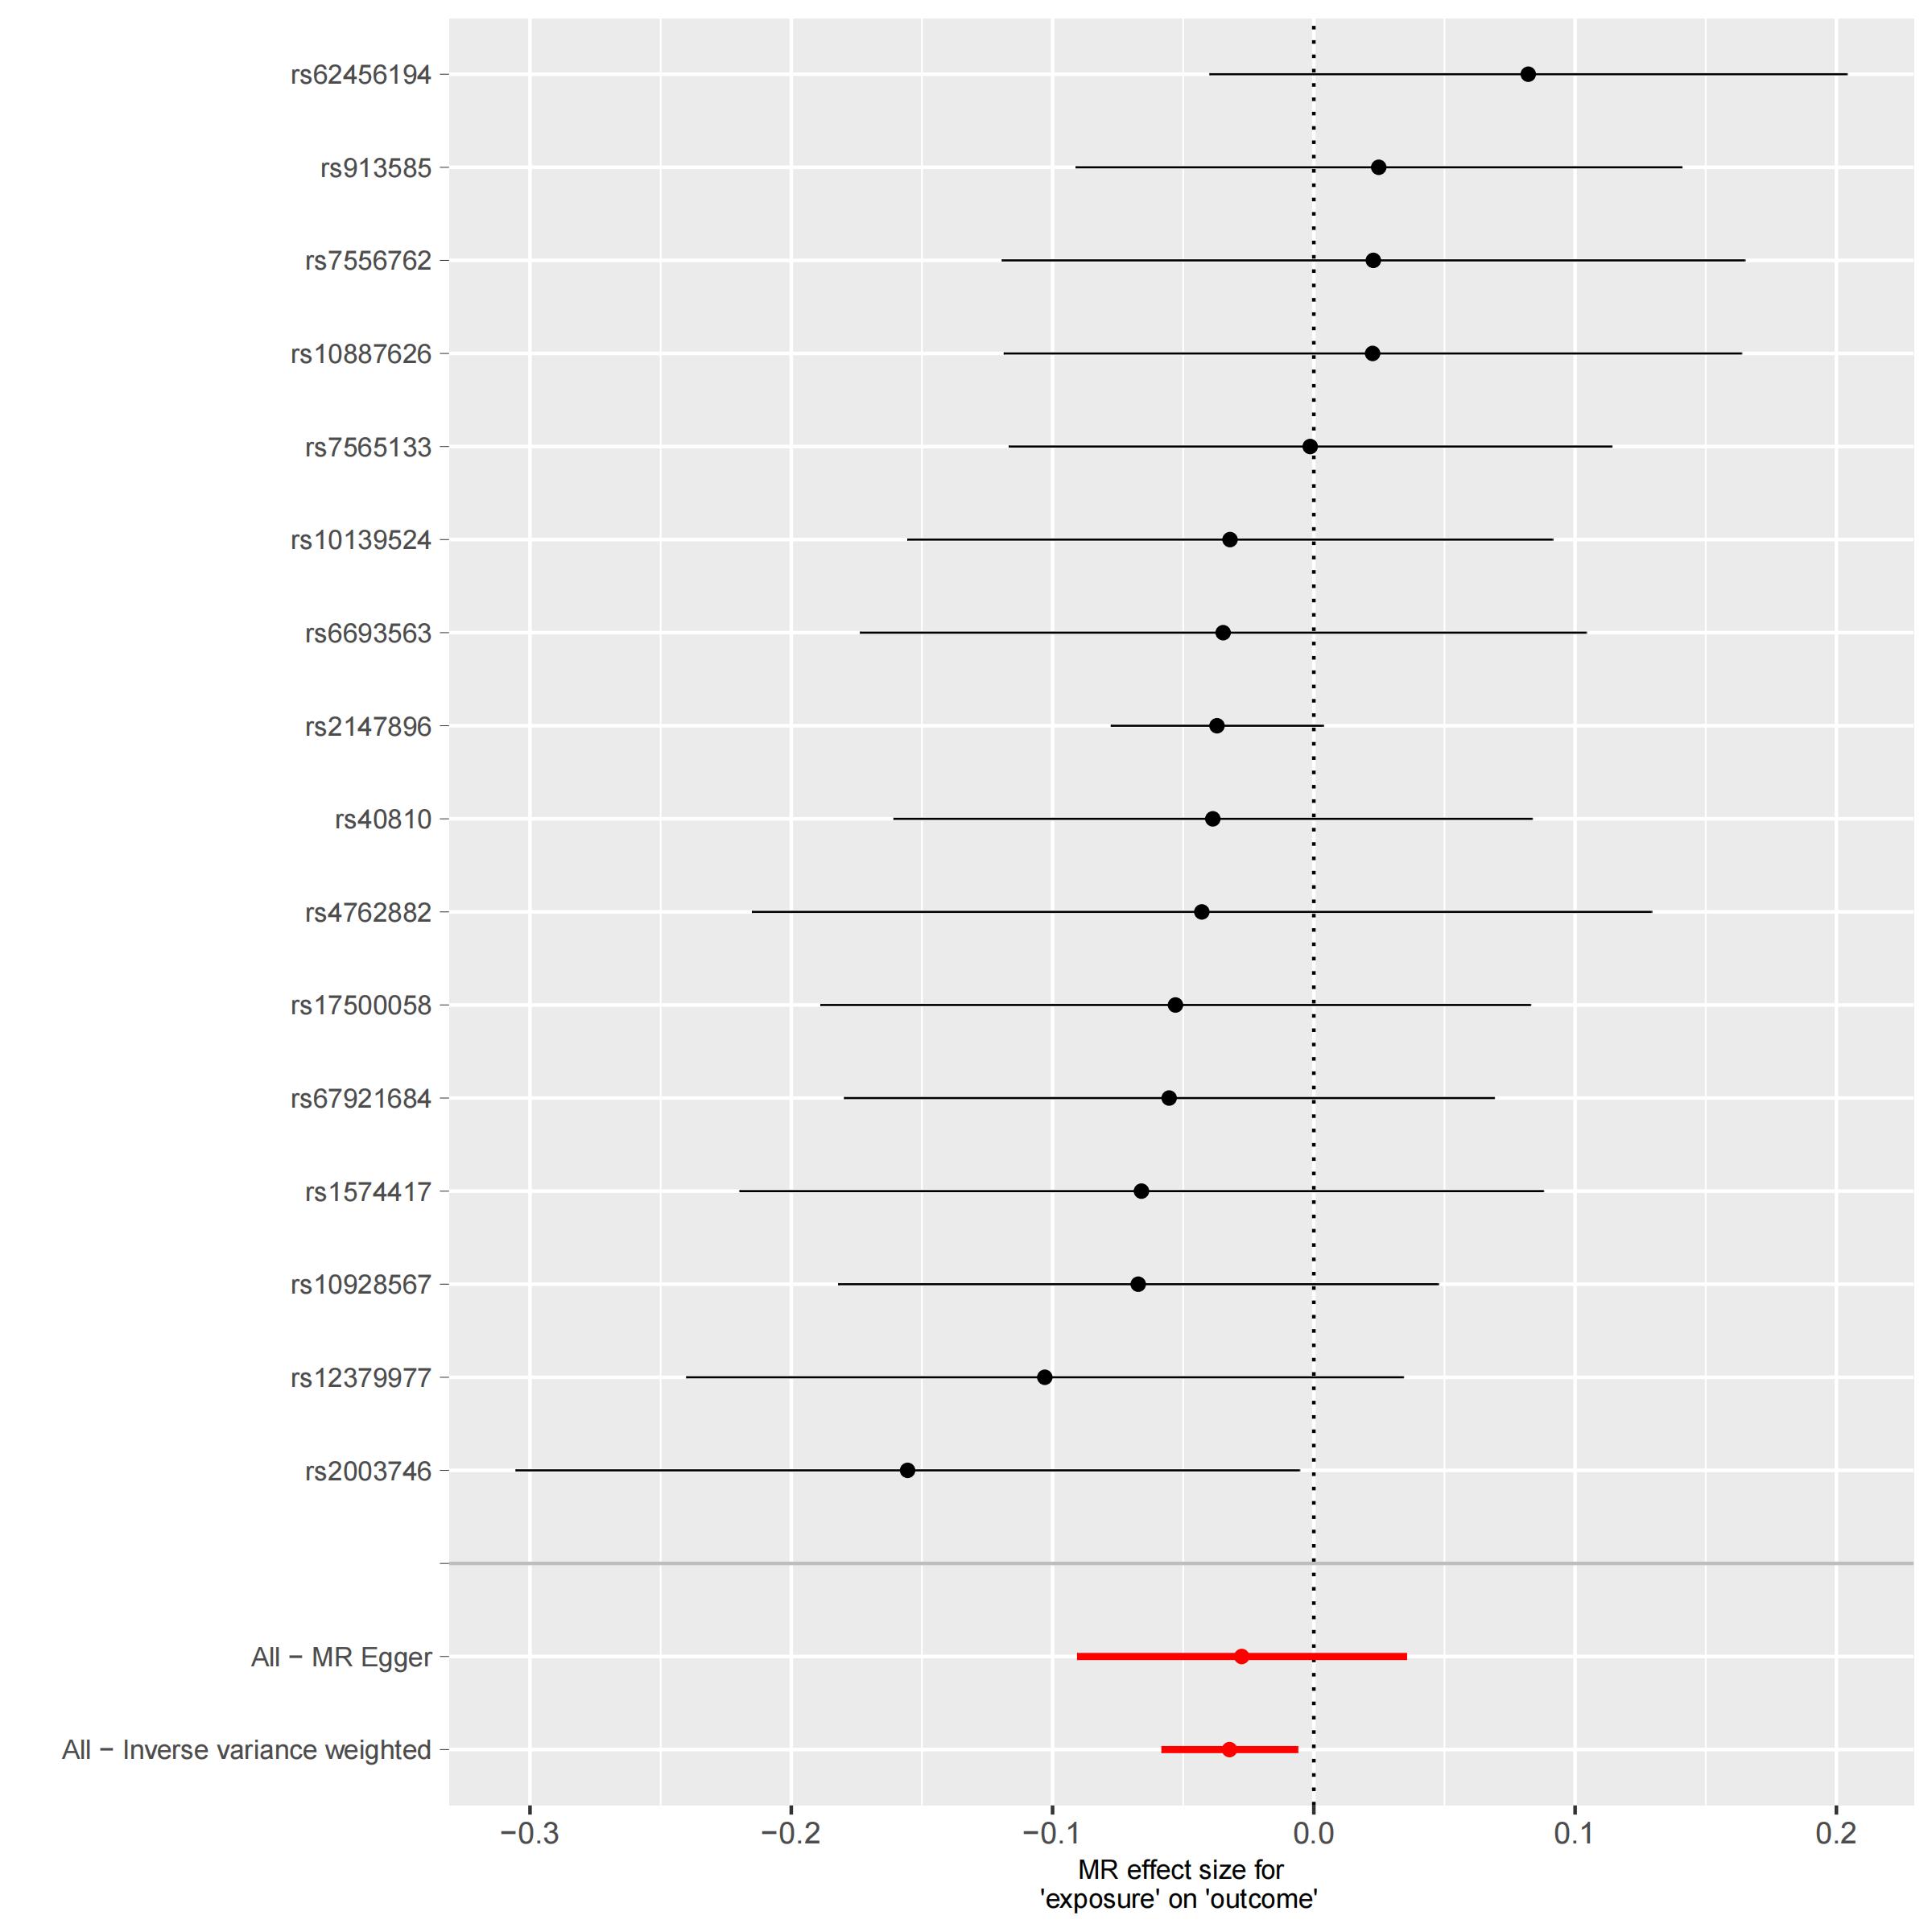


**E**   **F**


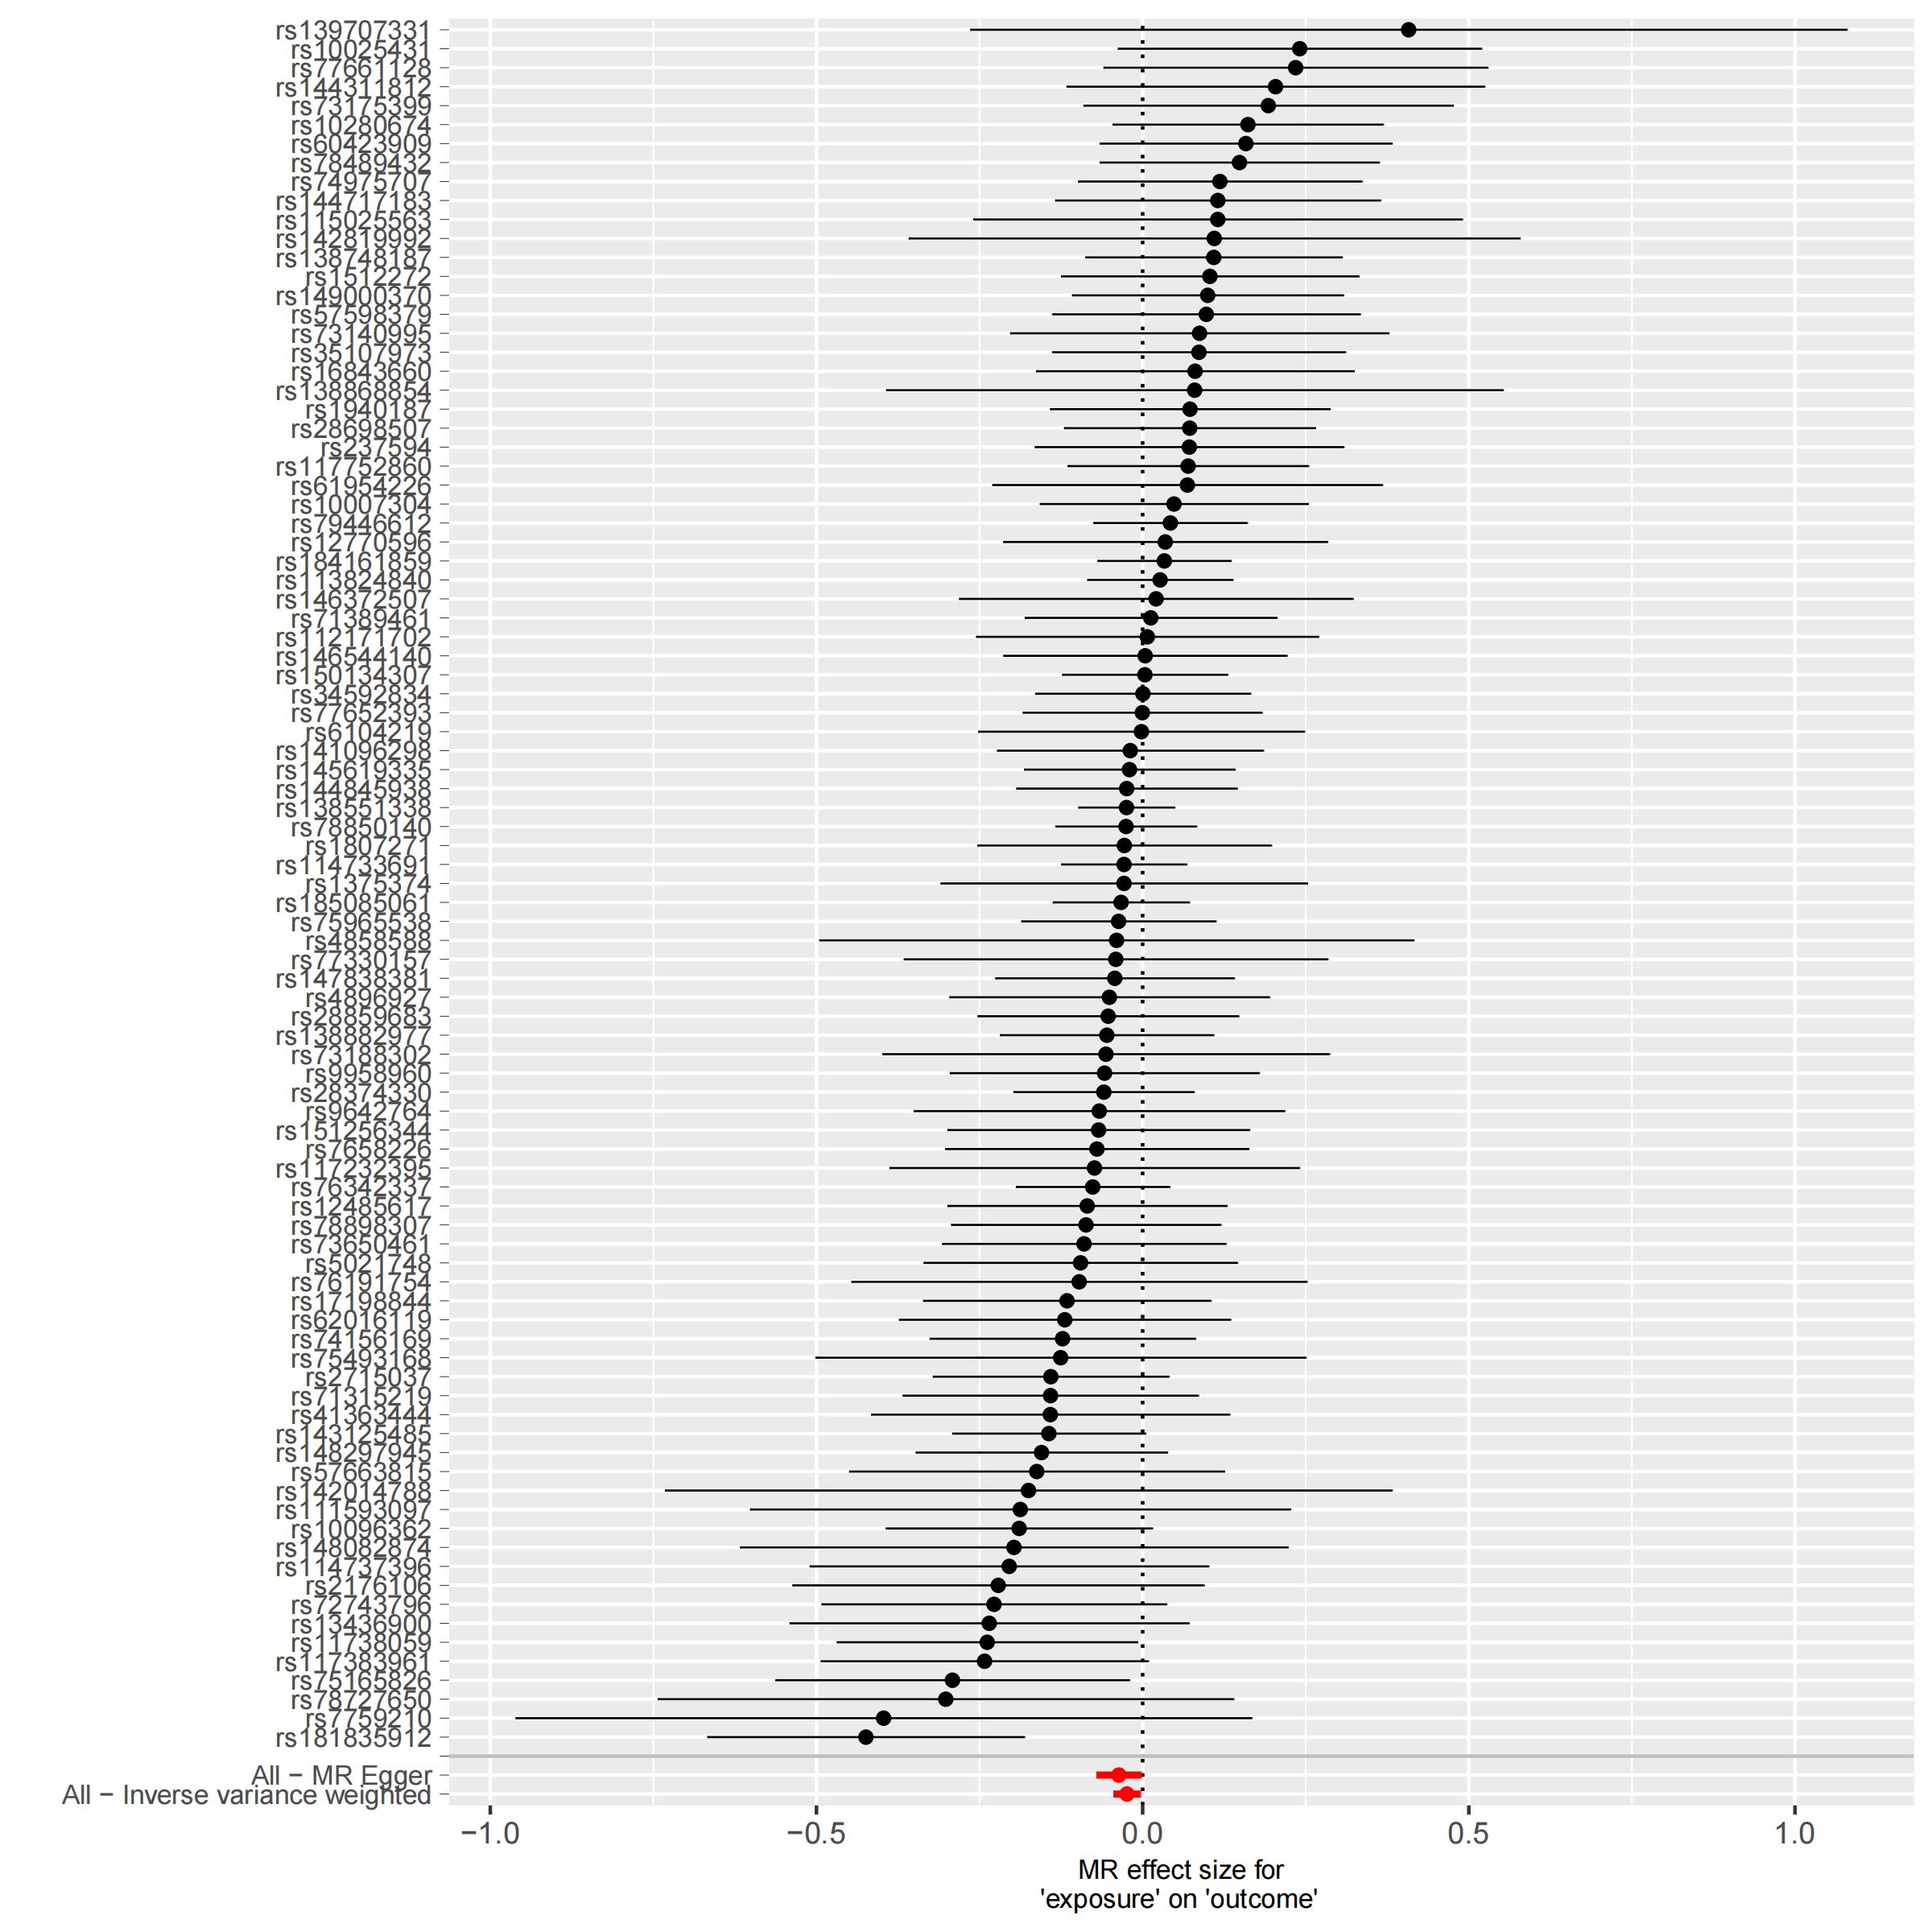

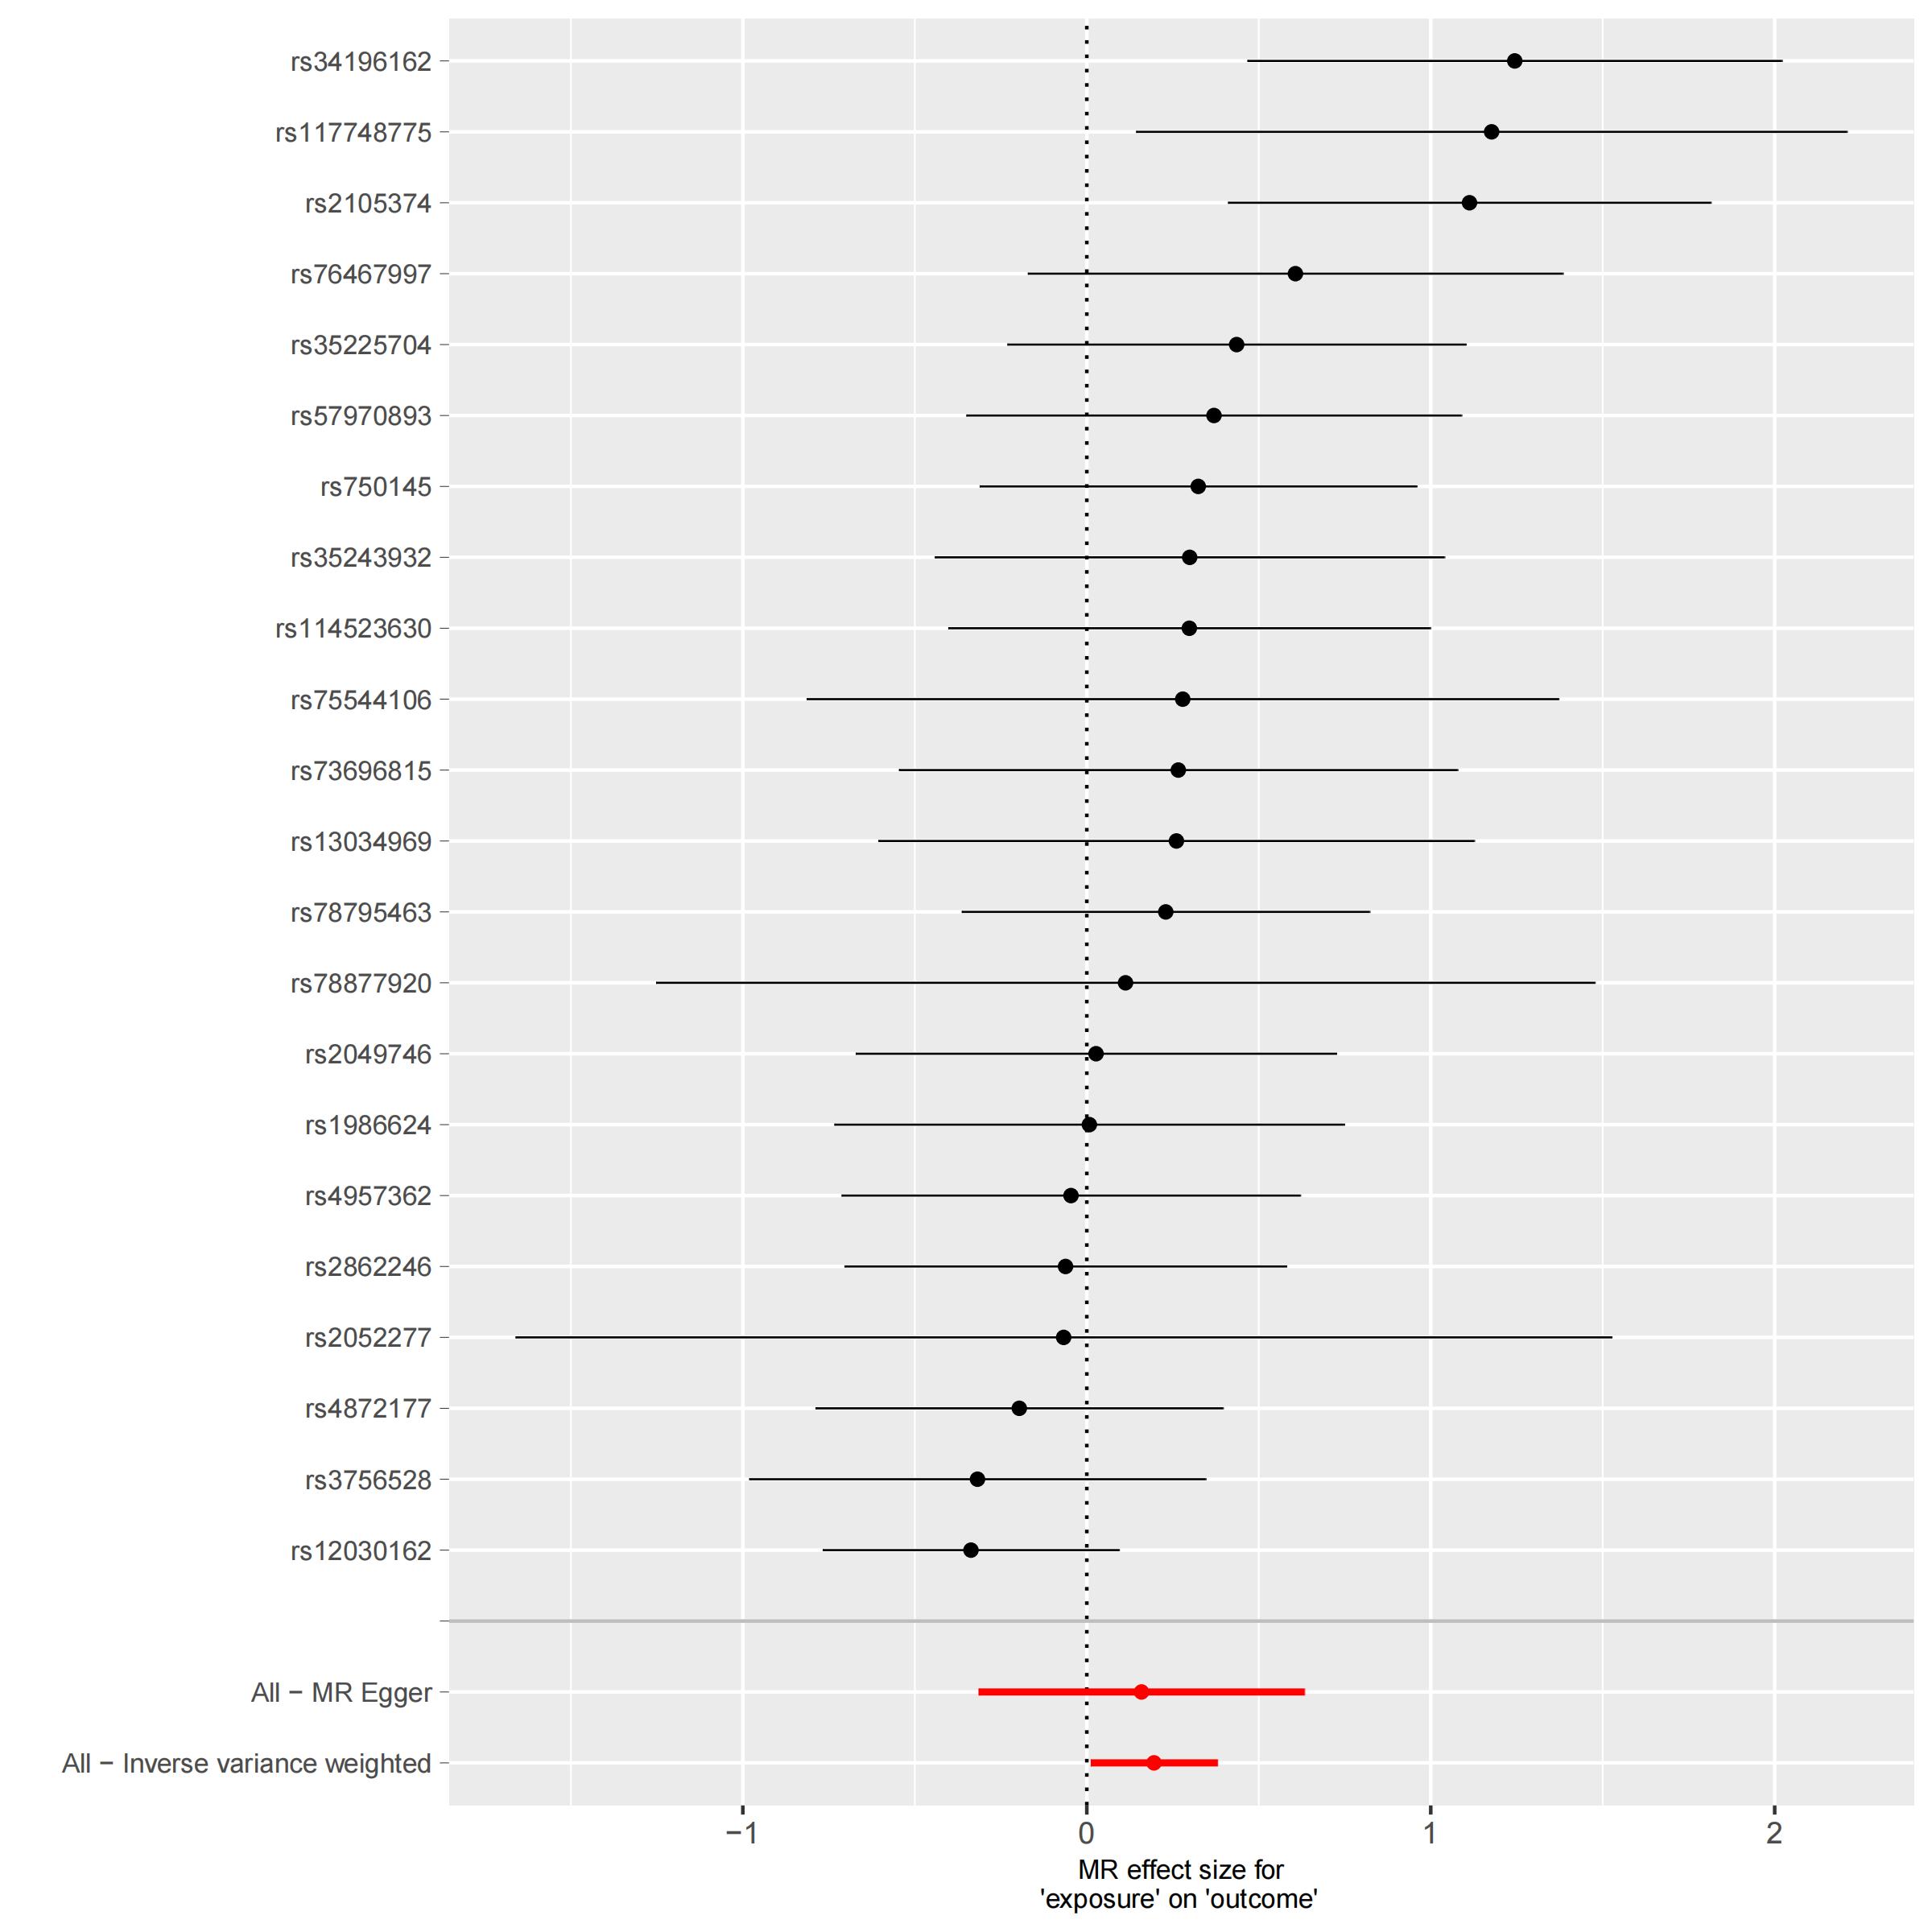


**G**   **H**


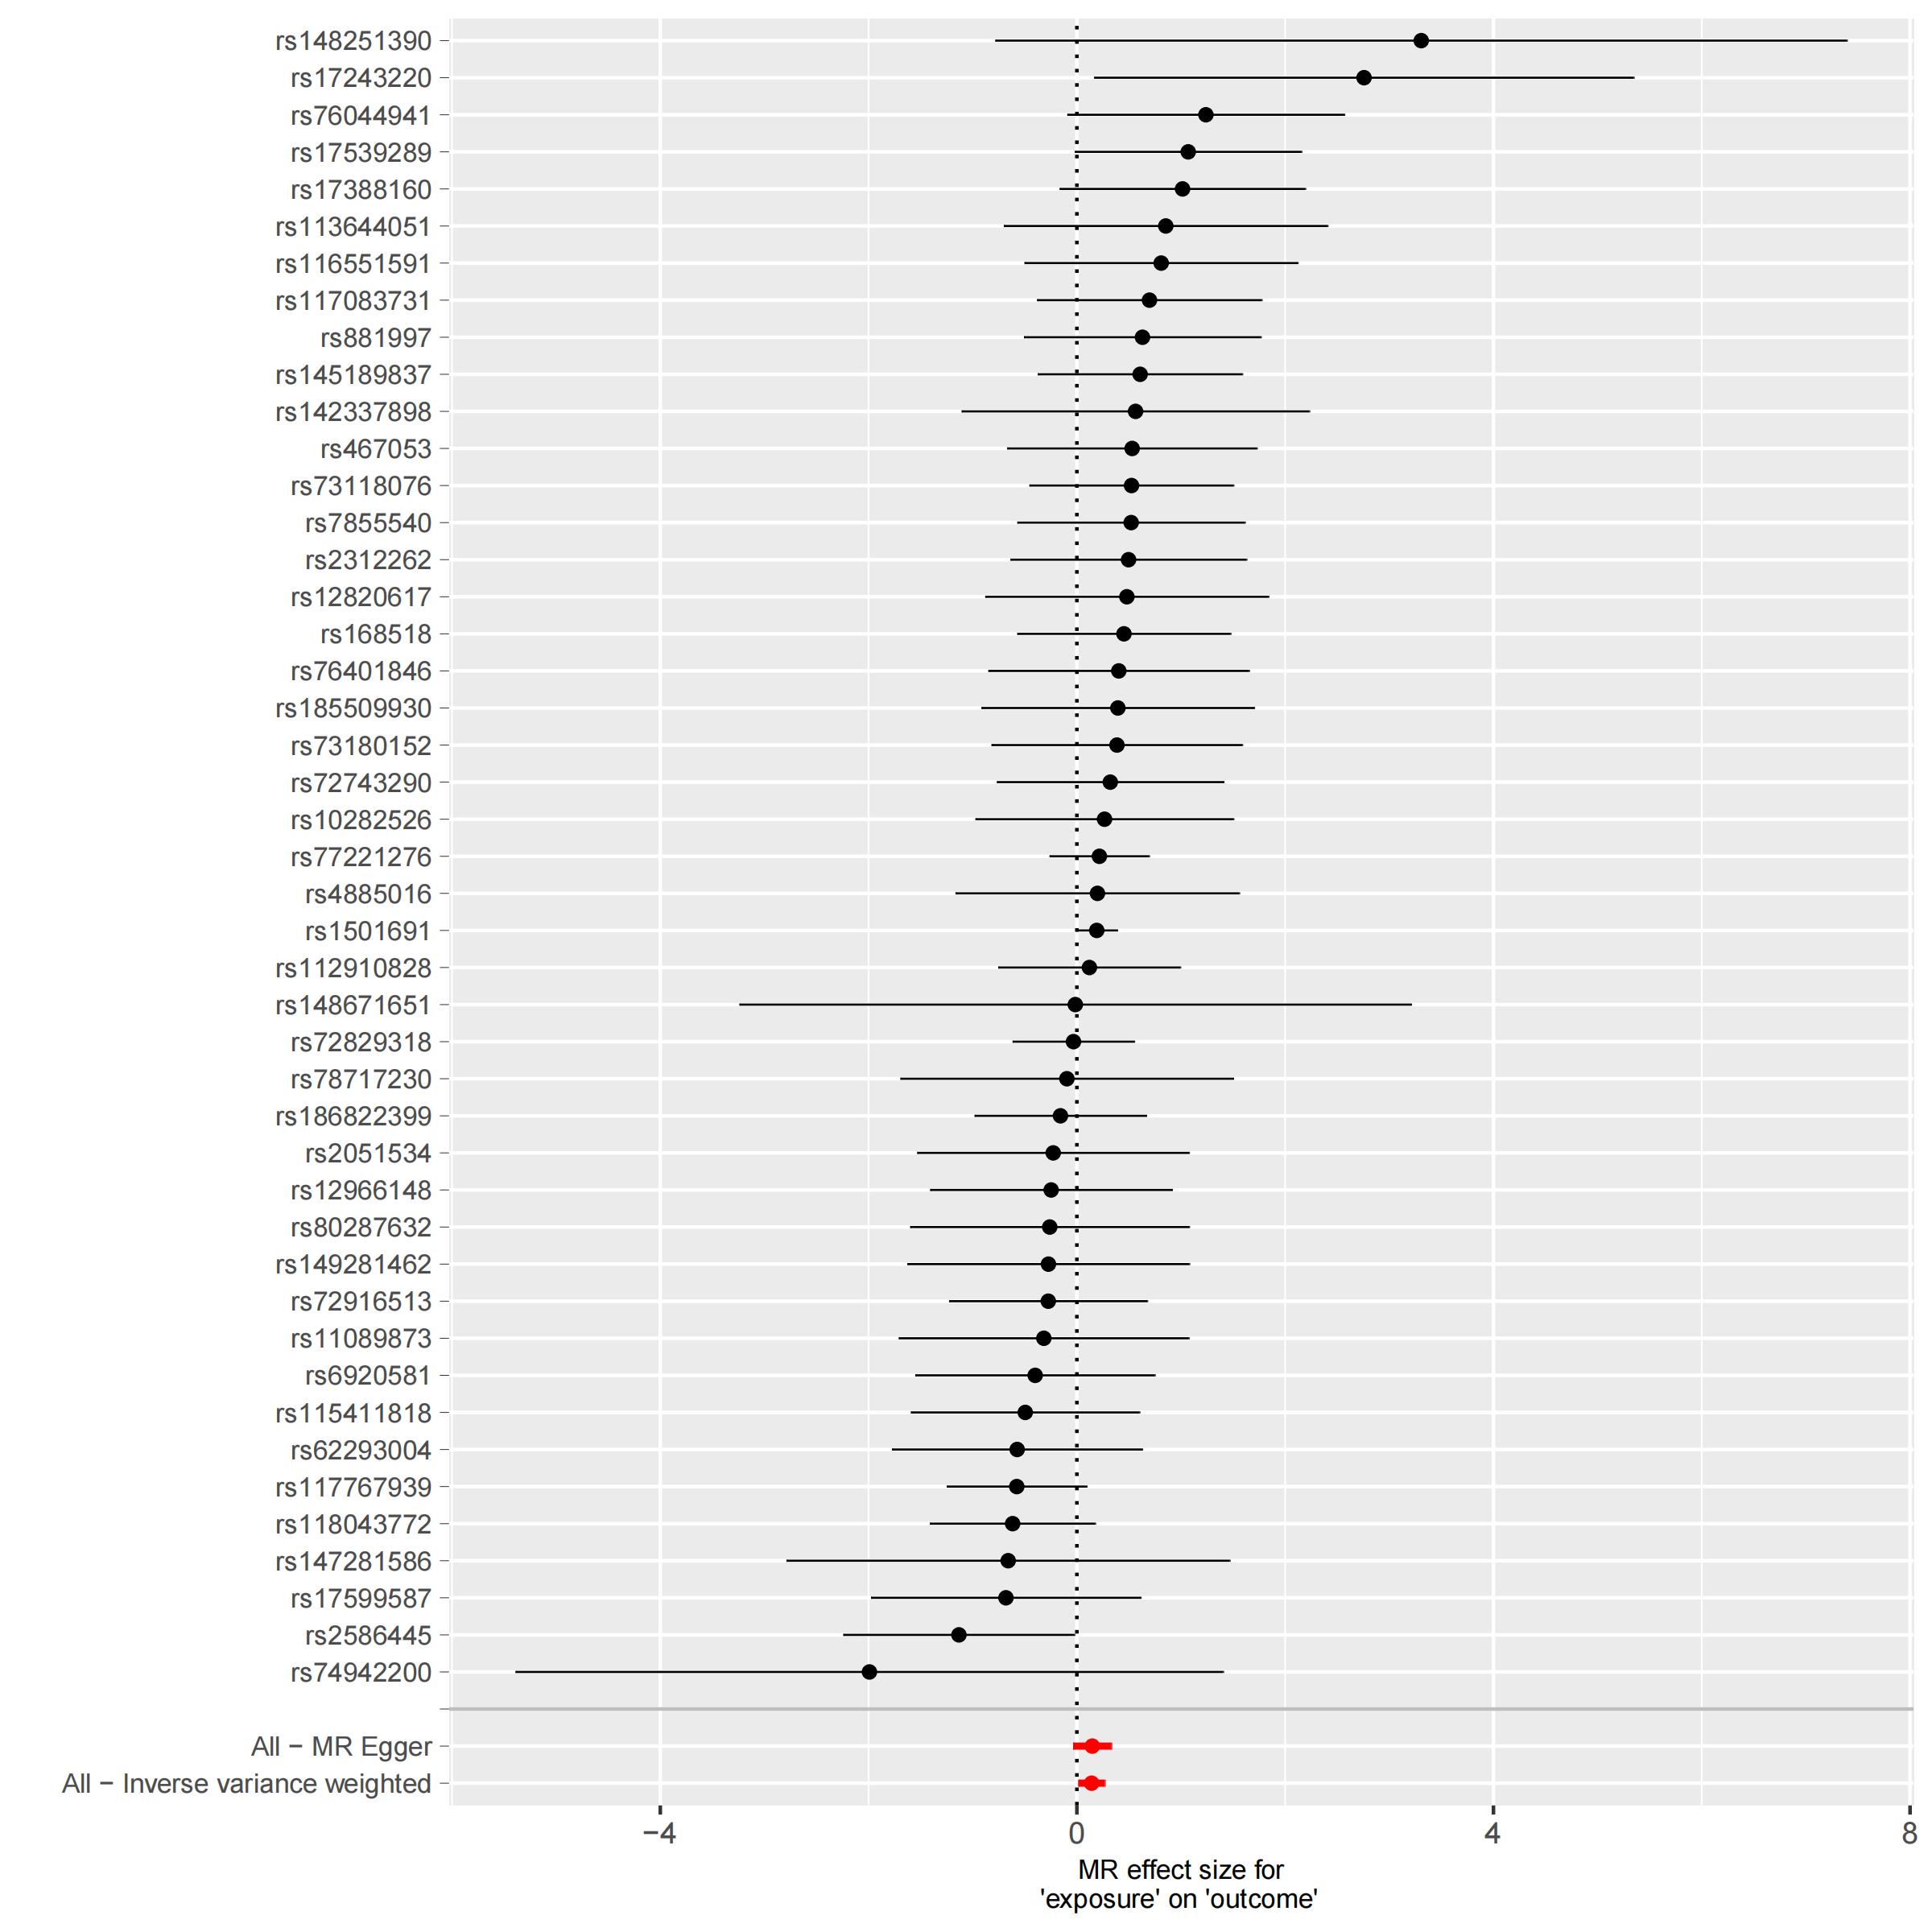

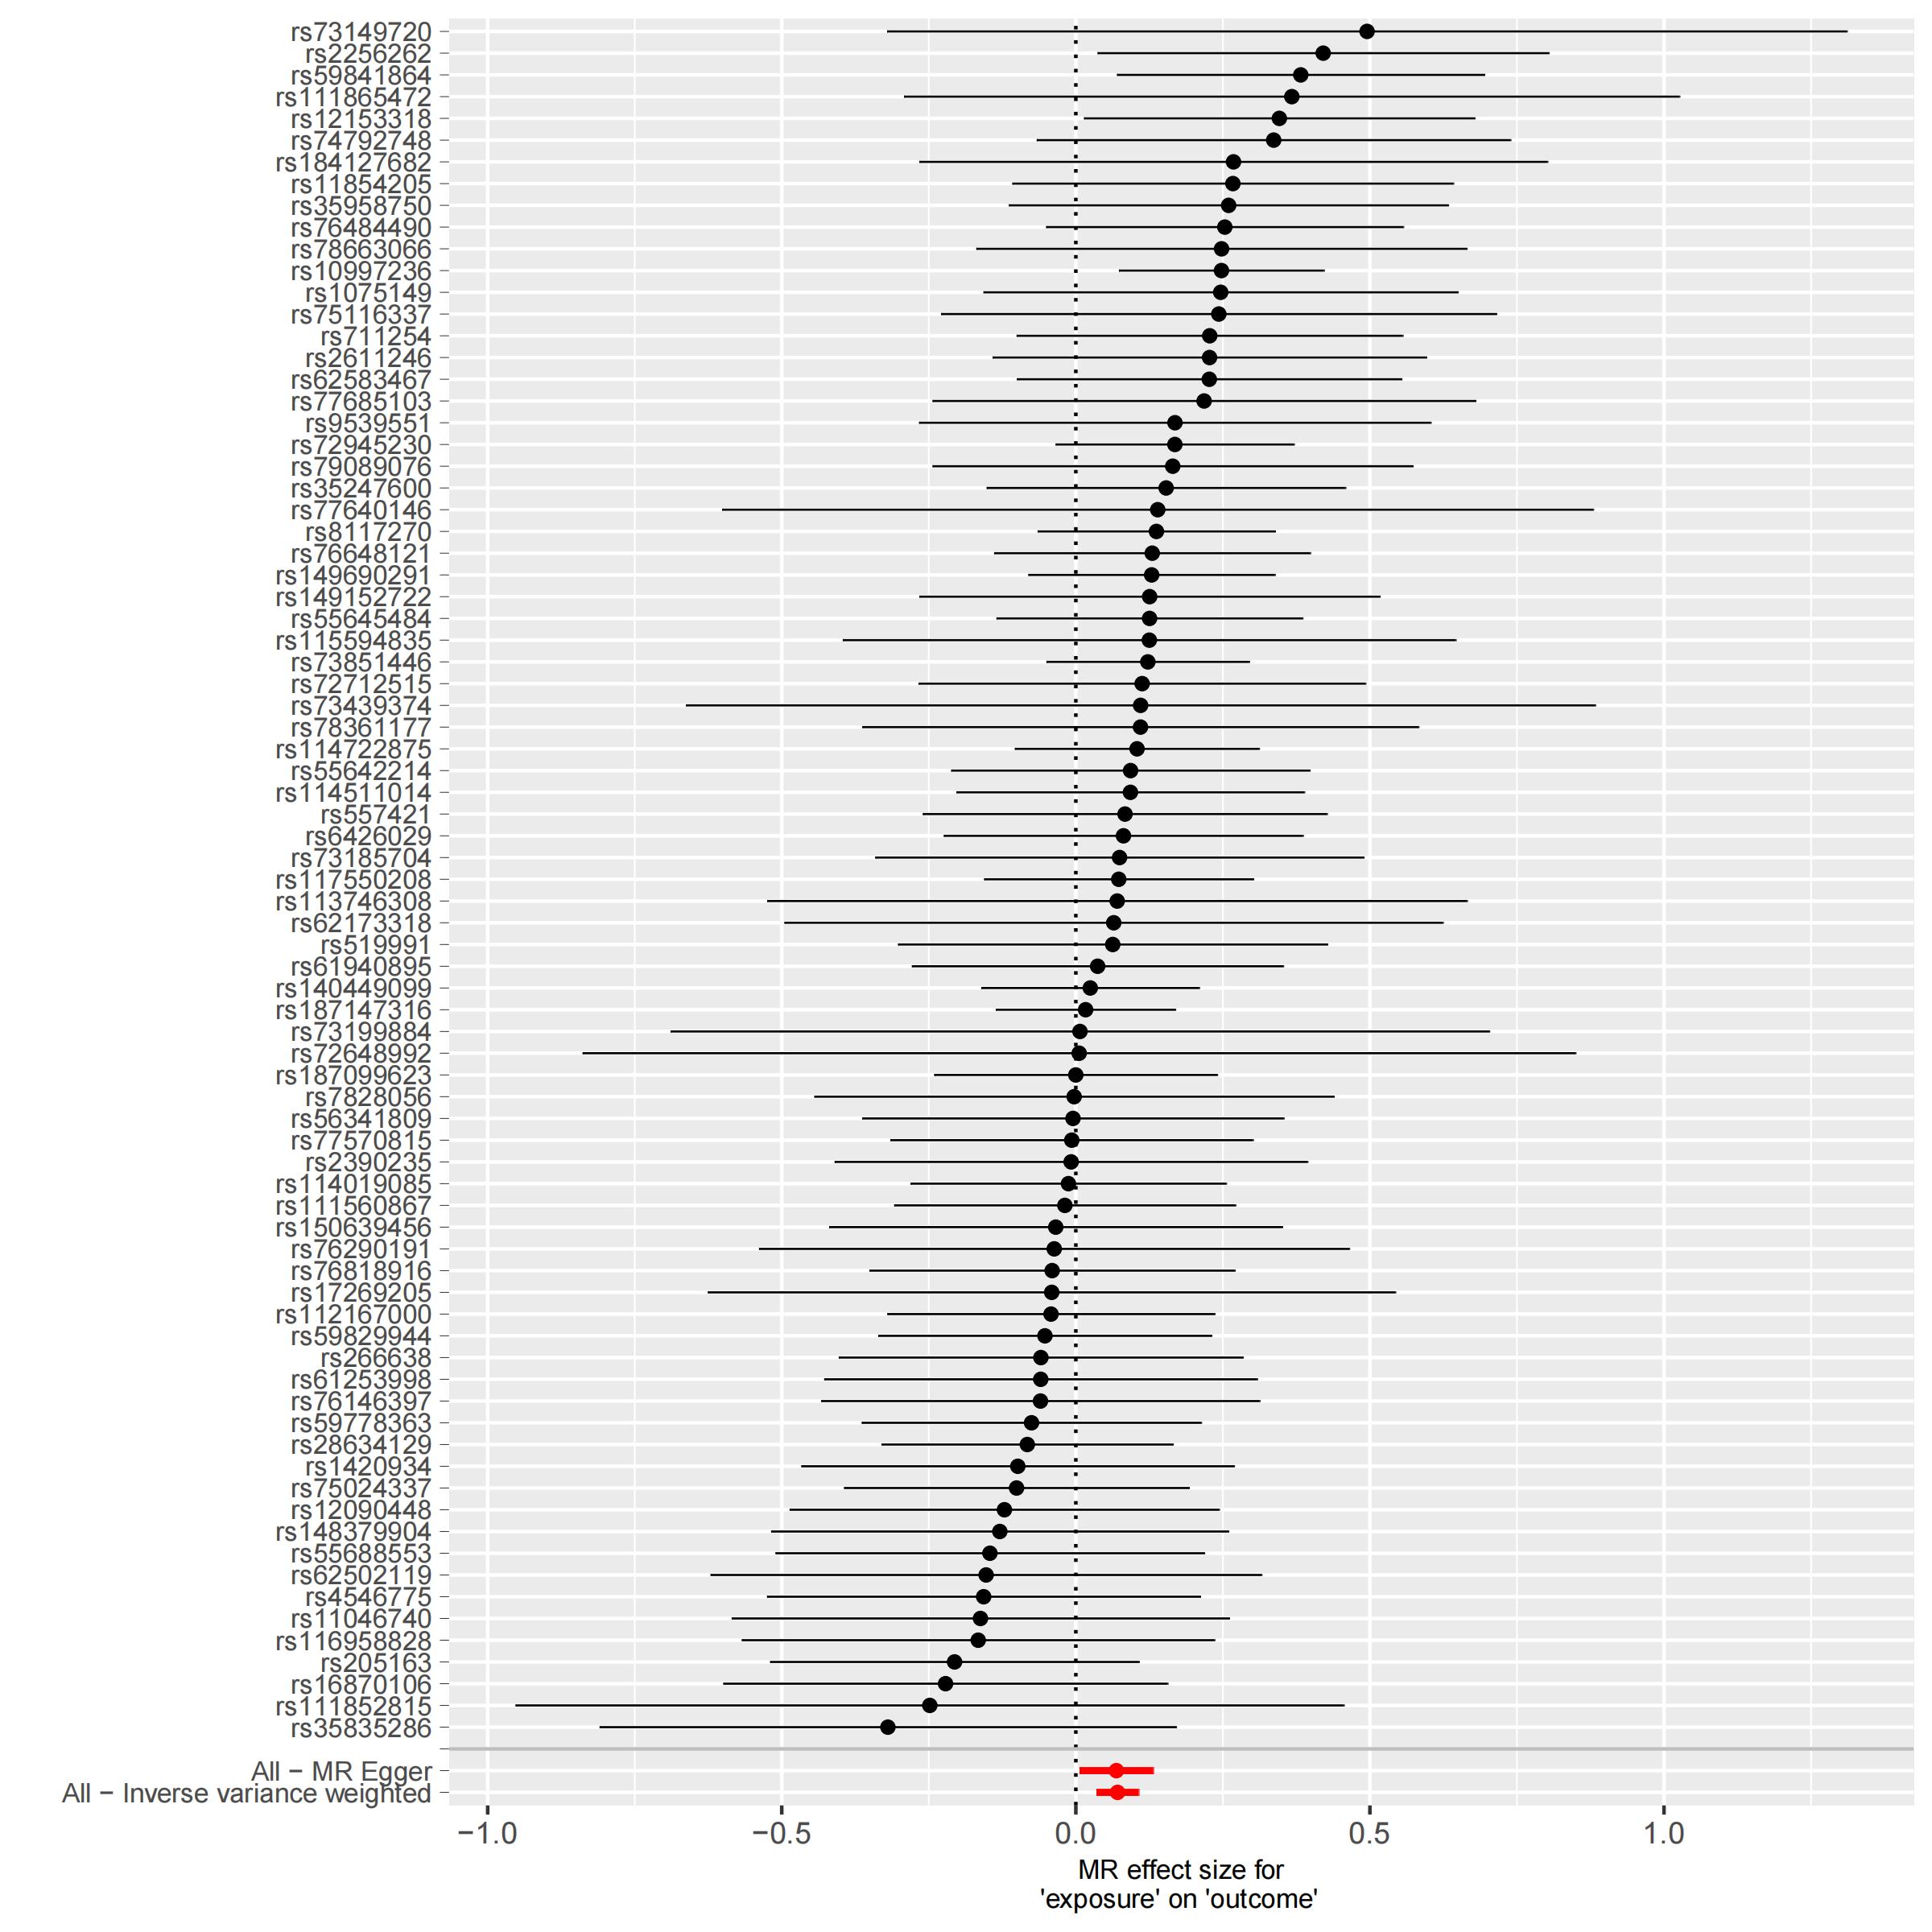


**I J**


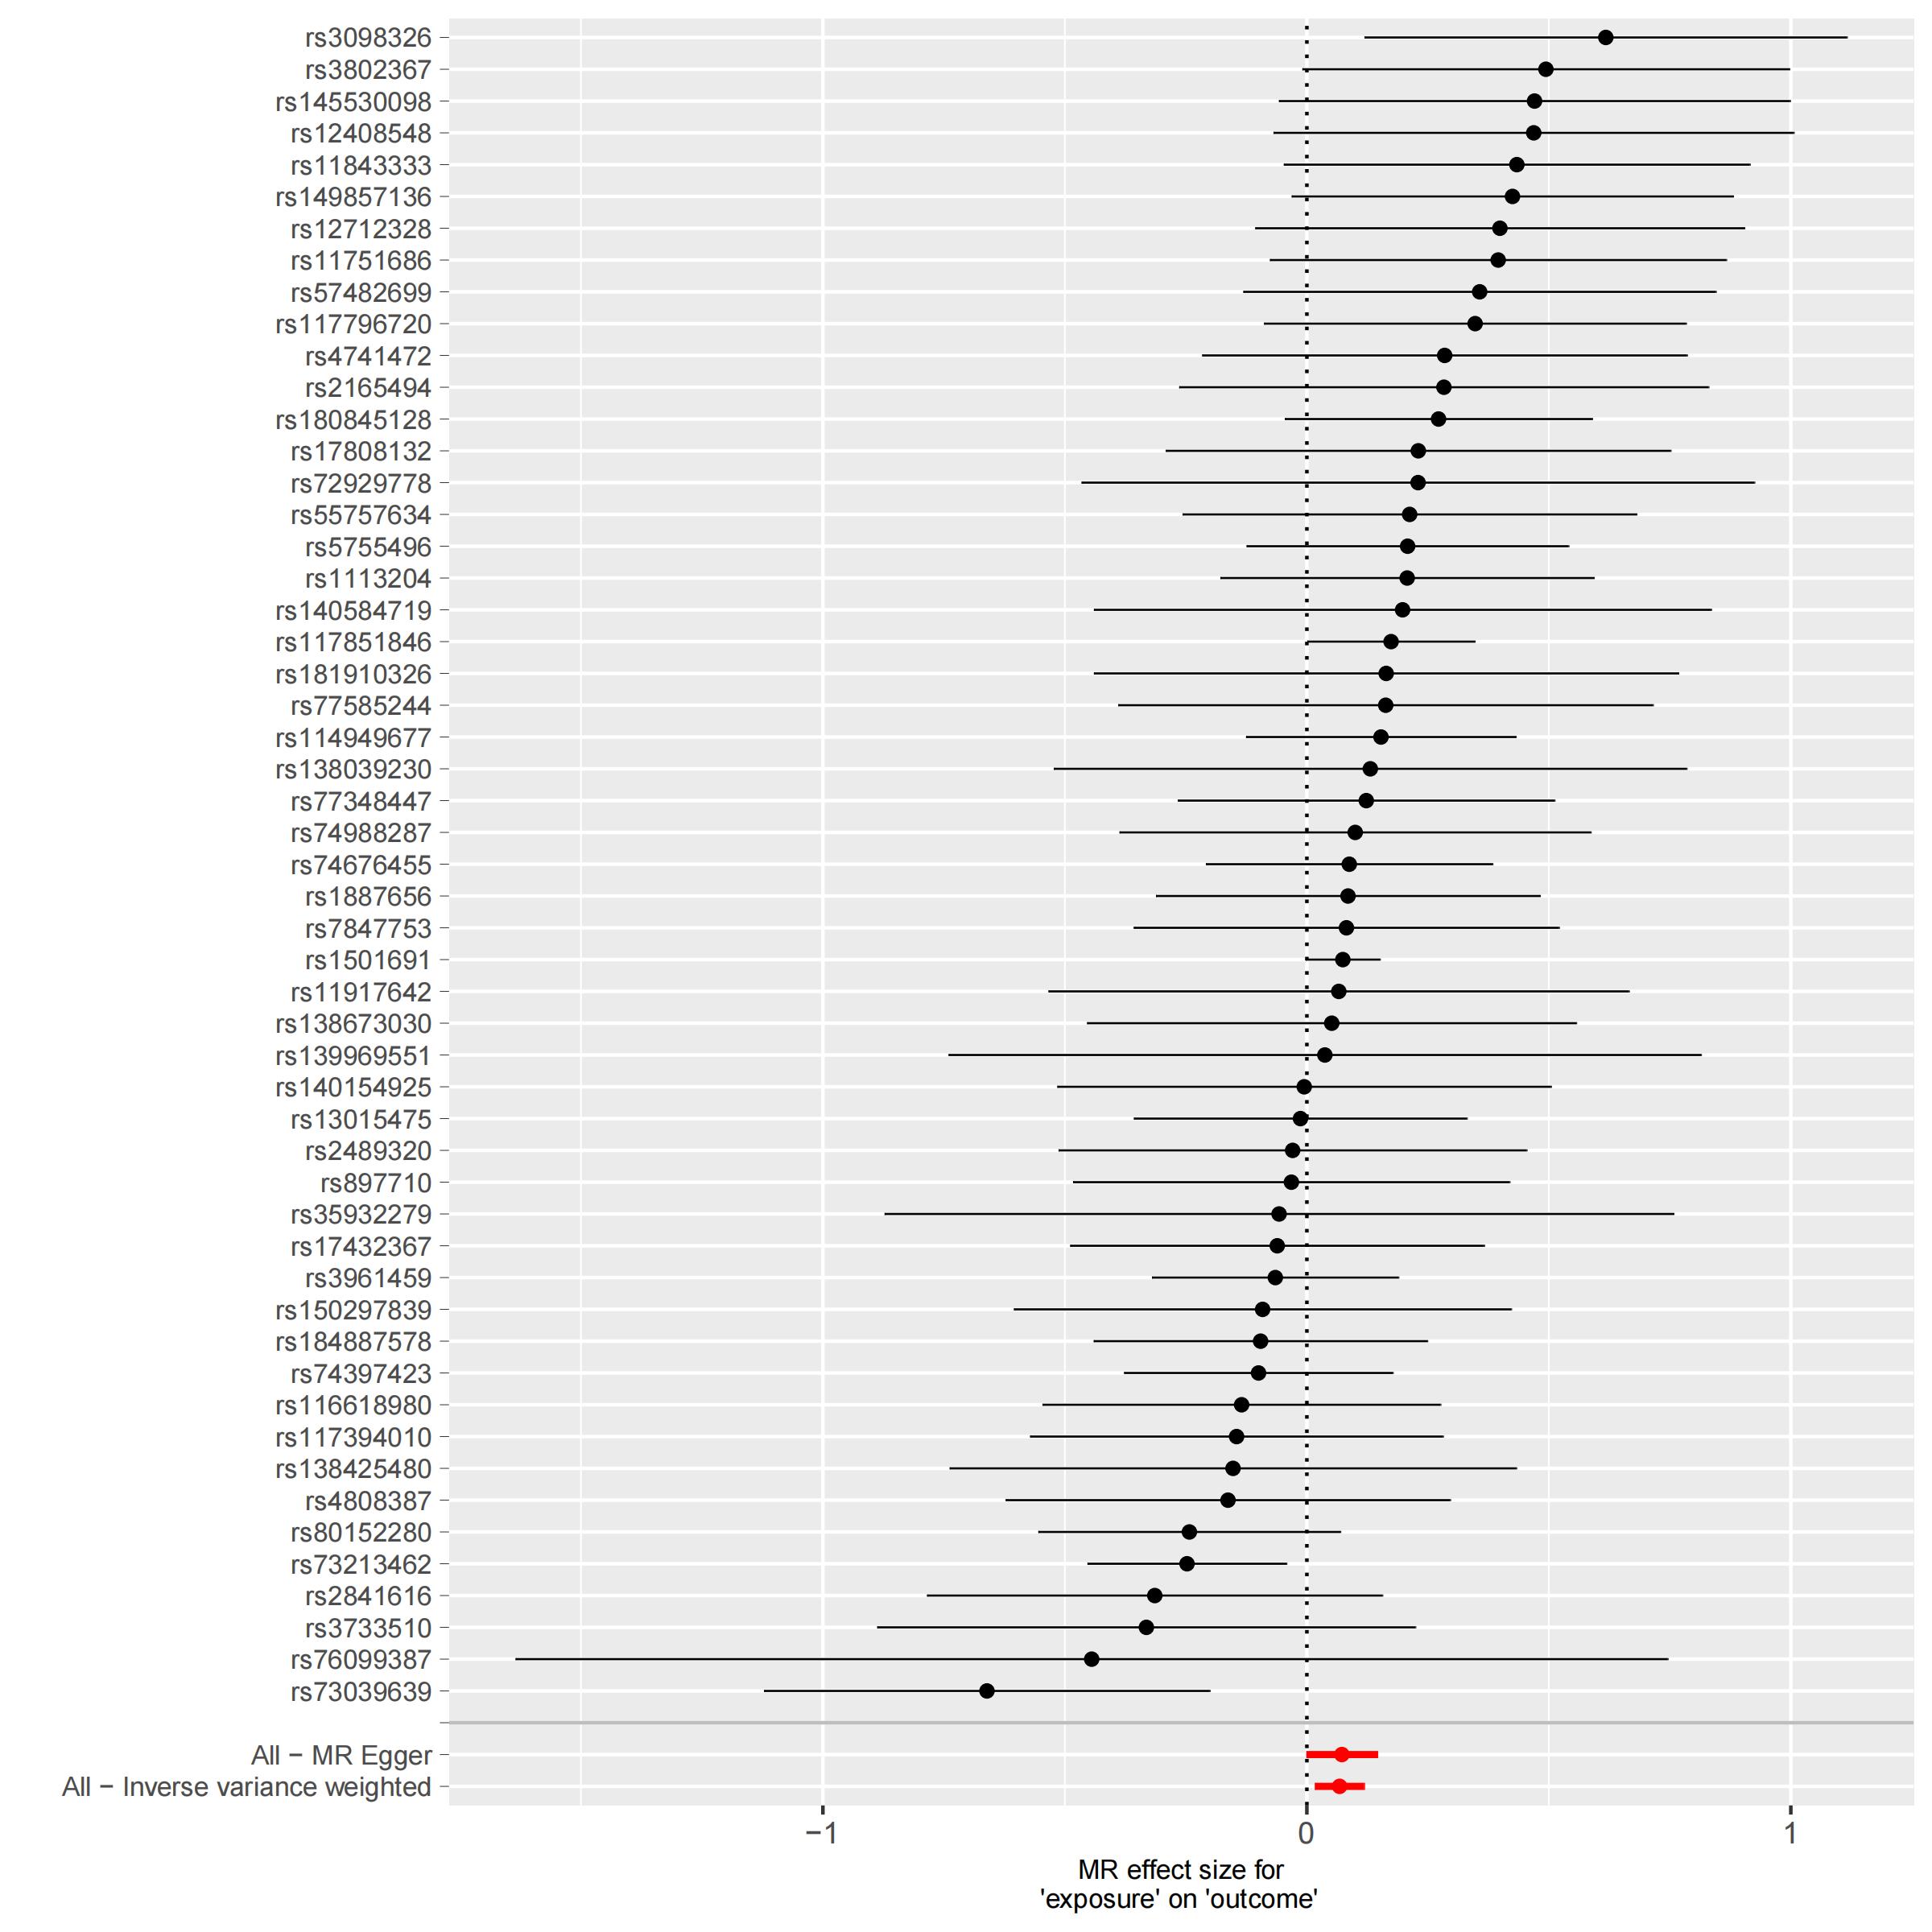

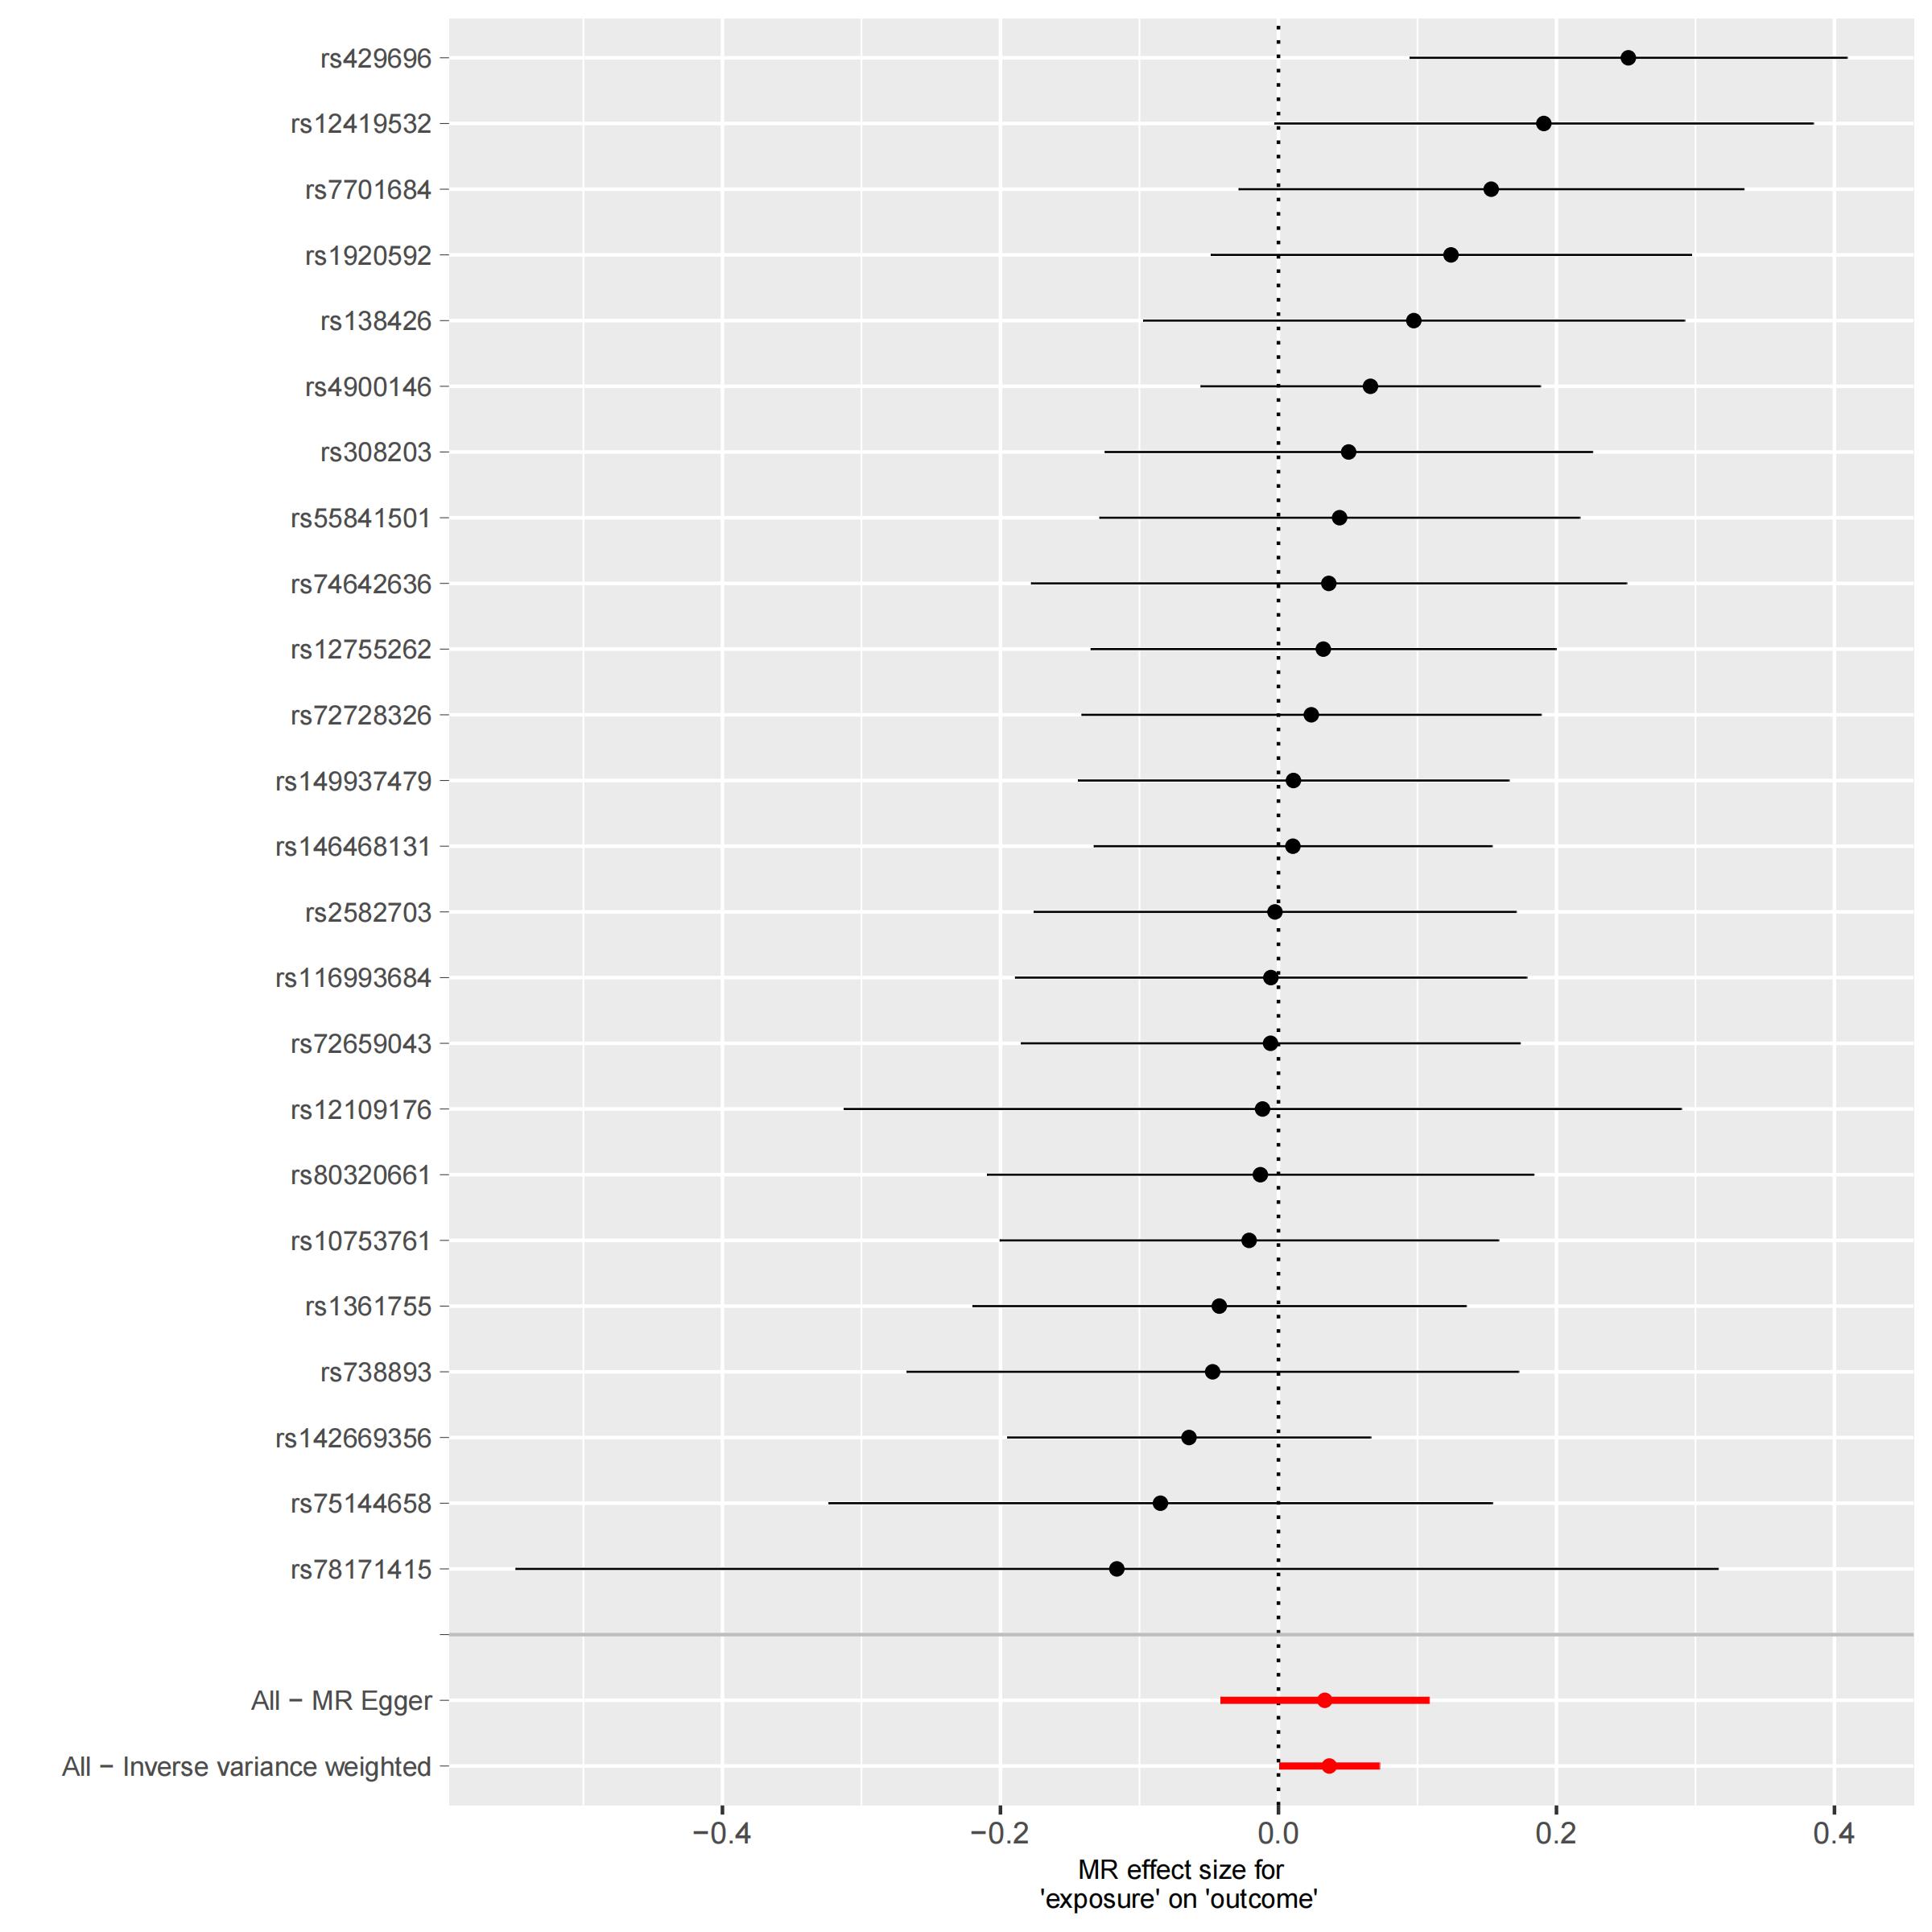


**Figure S2: Forest Plot of the MR Analysis Examining the Effect of CSF on PPD**

This forest plot illustrates the MR analysis examining the effect of CSF metabolites on PPD. Black dots signify the impact of individual SNPs on the risk of PPD associated with each CSF metabolite. The black lines denote the 95% confidence intervals for these estimates. The overall effect of CSF metabolites on PPD, calculated using both MR-Egger and IVW methods, is represented by additional black dots. The CSF metabolites are ordered from A to J as follows: Guanosine, Argininosuccinate, Maleate, N6-methyllysine, Homocarnosine, N-acetyl-isoputreanine, Glucose, Benzoate, Gluconate, and Arachidonate (20:4n6).

**A**
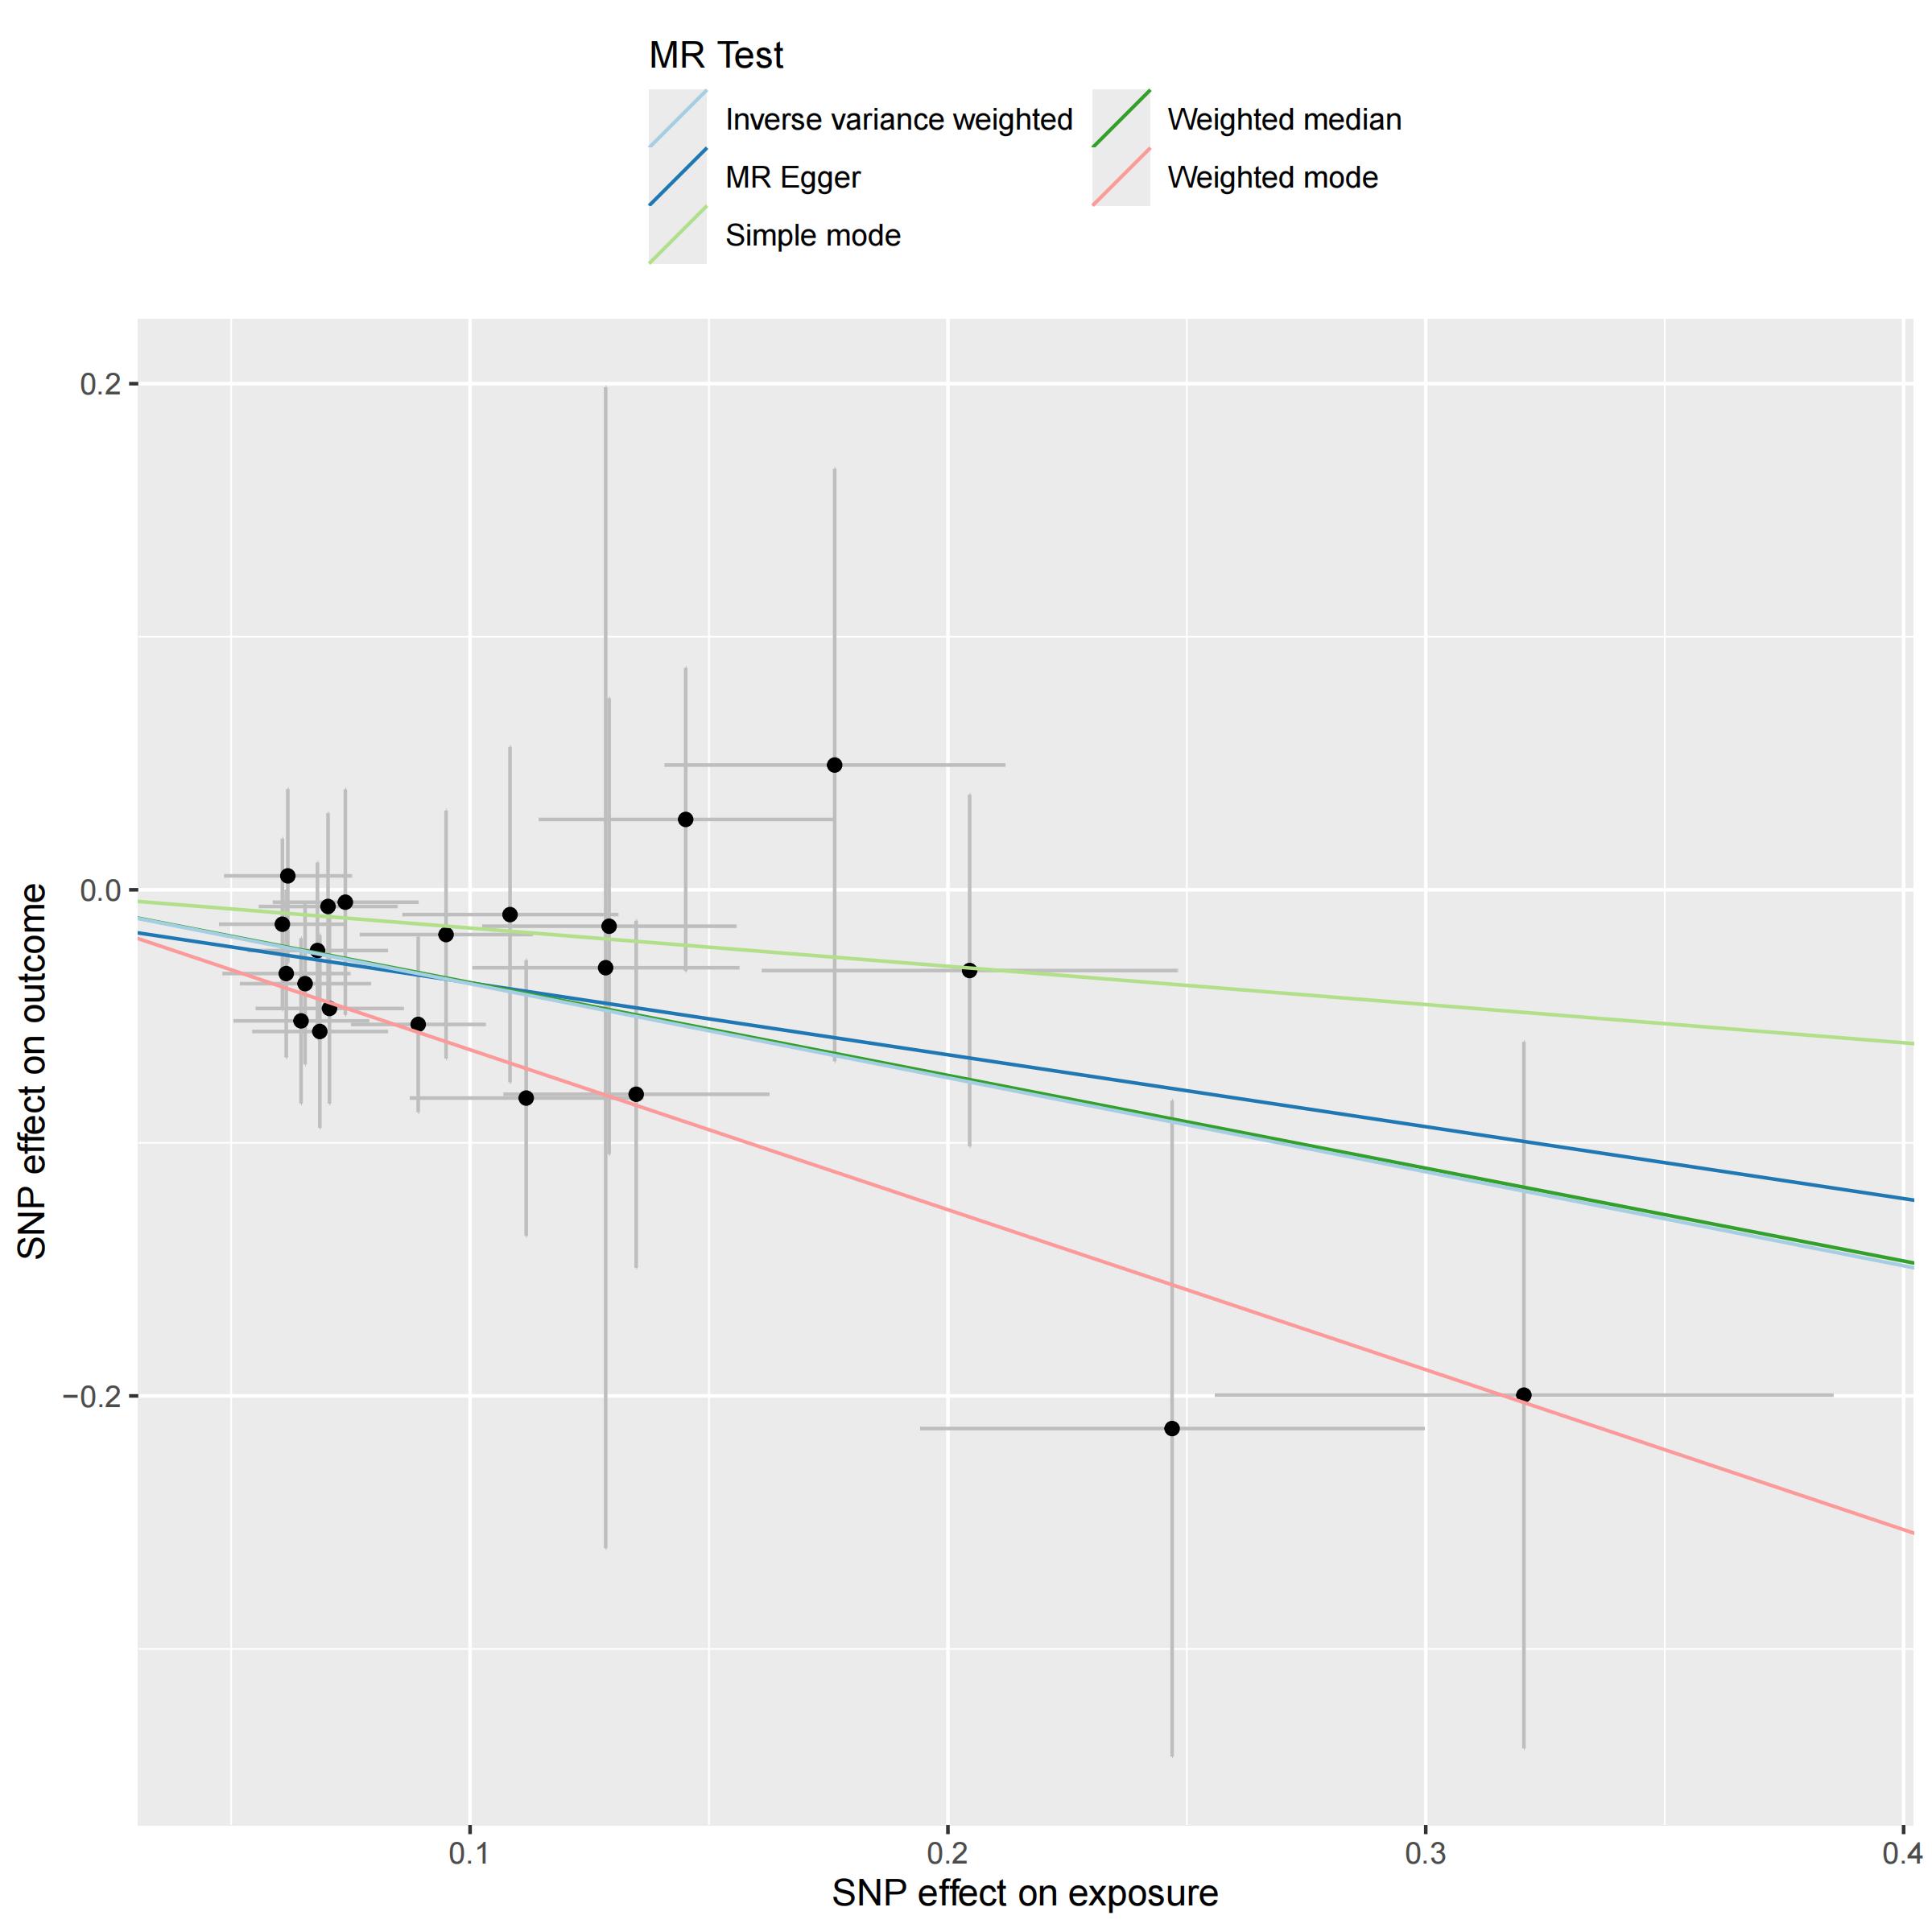


**Figure S3 Scatter plot of MR Results**

Scatter plot illustrating genetic associations between postpartum PPD and cerebrospinal fluid metabolites via MR analyses. The x-axis displays the estimated effect of guanosine-associated SNPs on postpartum depression risk, while the y-axis depicts the corresponding SNP effects on cerebrospinal fluid metabolite levels. Regression line slopes represent causal effect estimates generated by distinct MR methodologies.

**A**


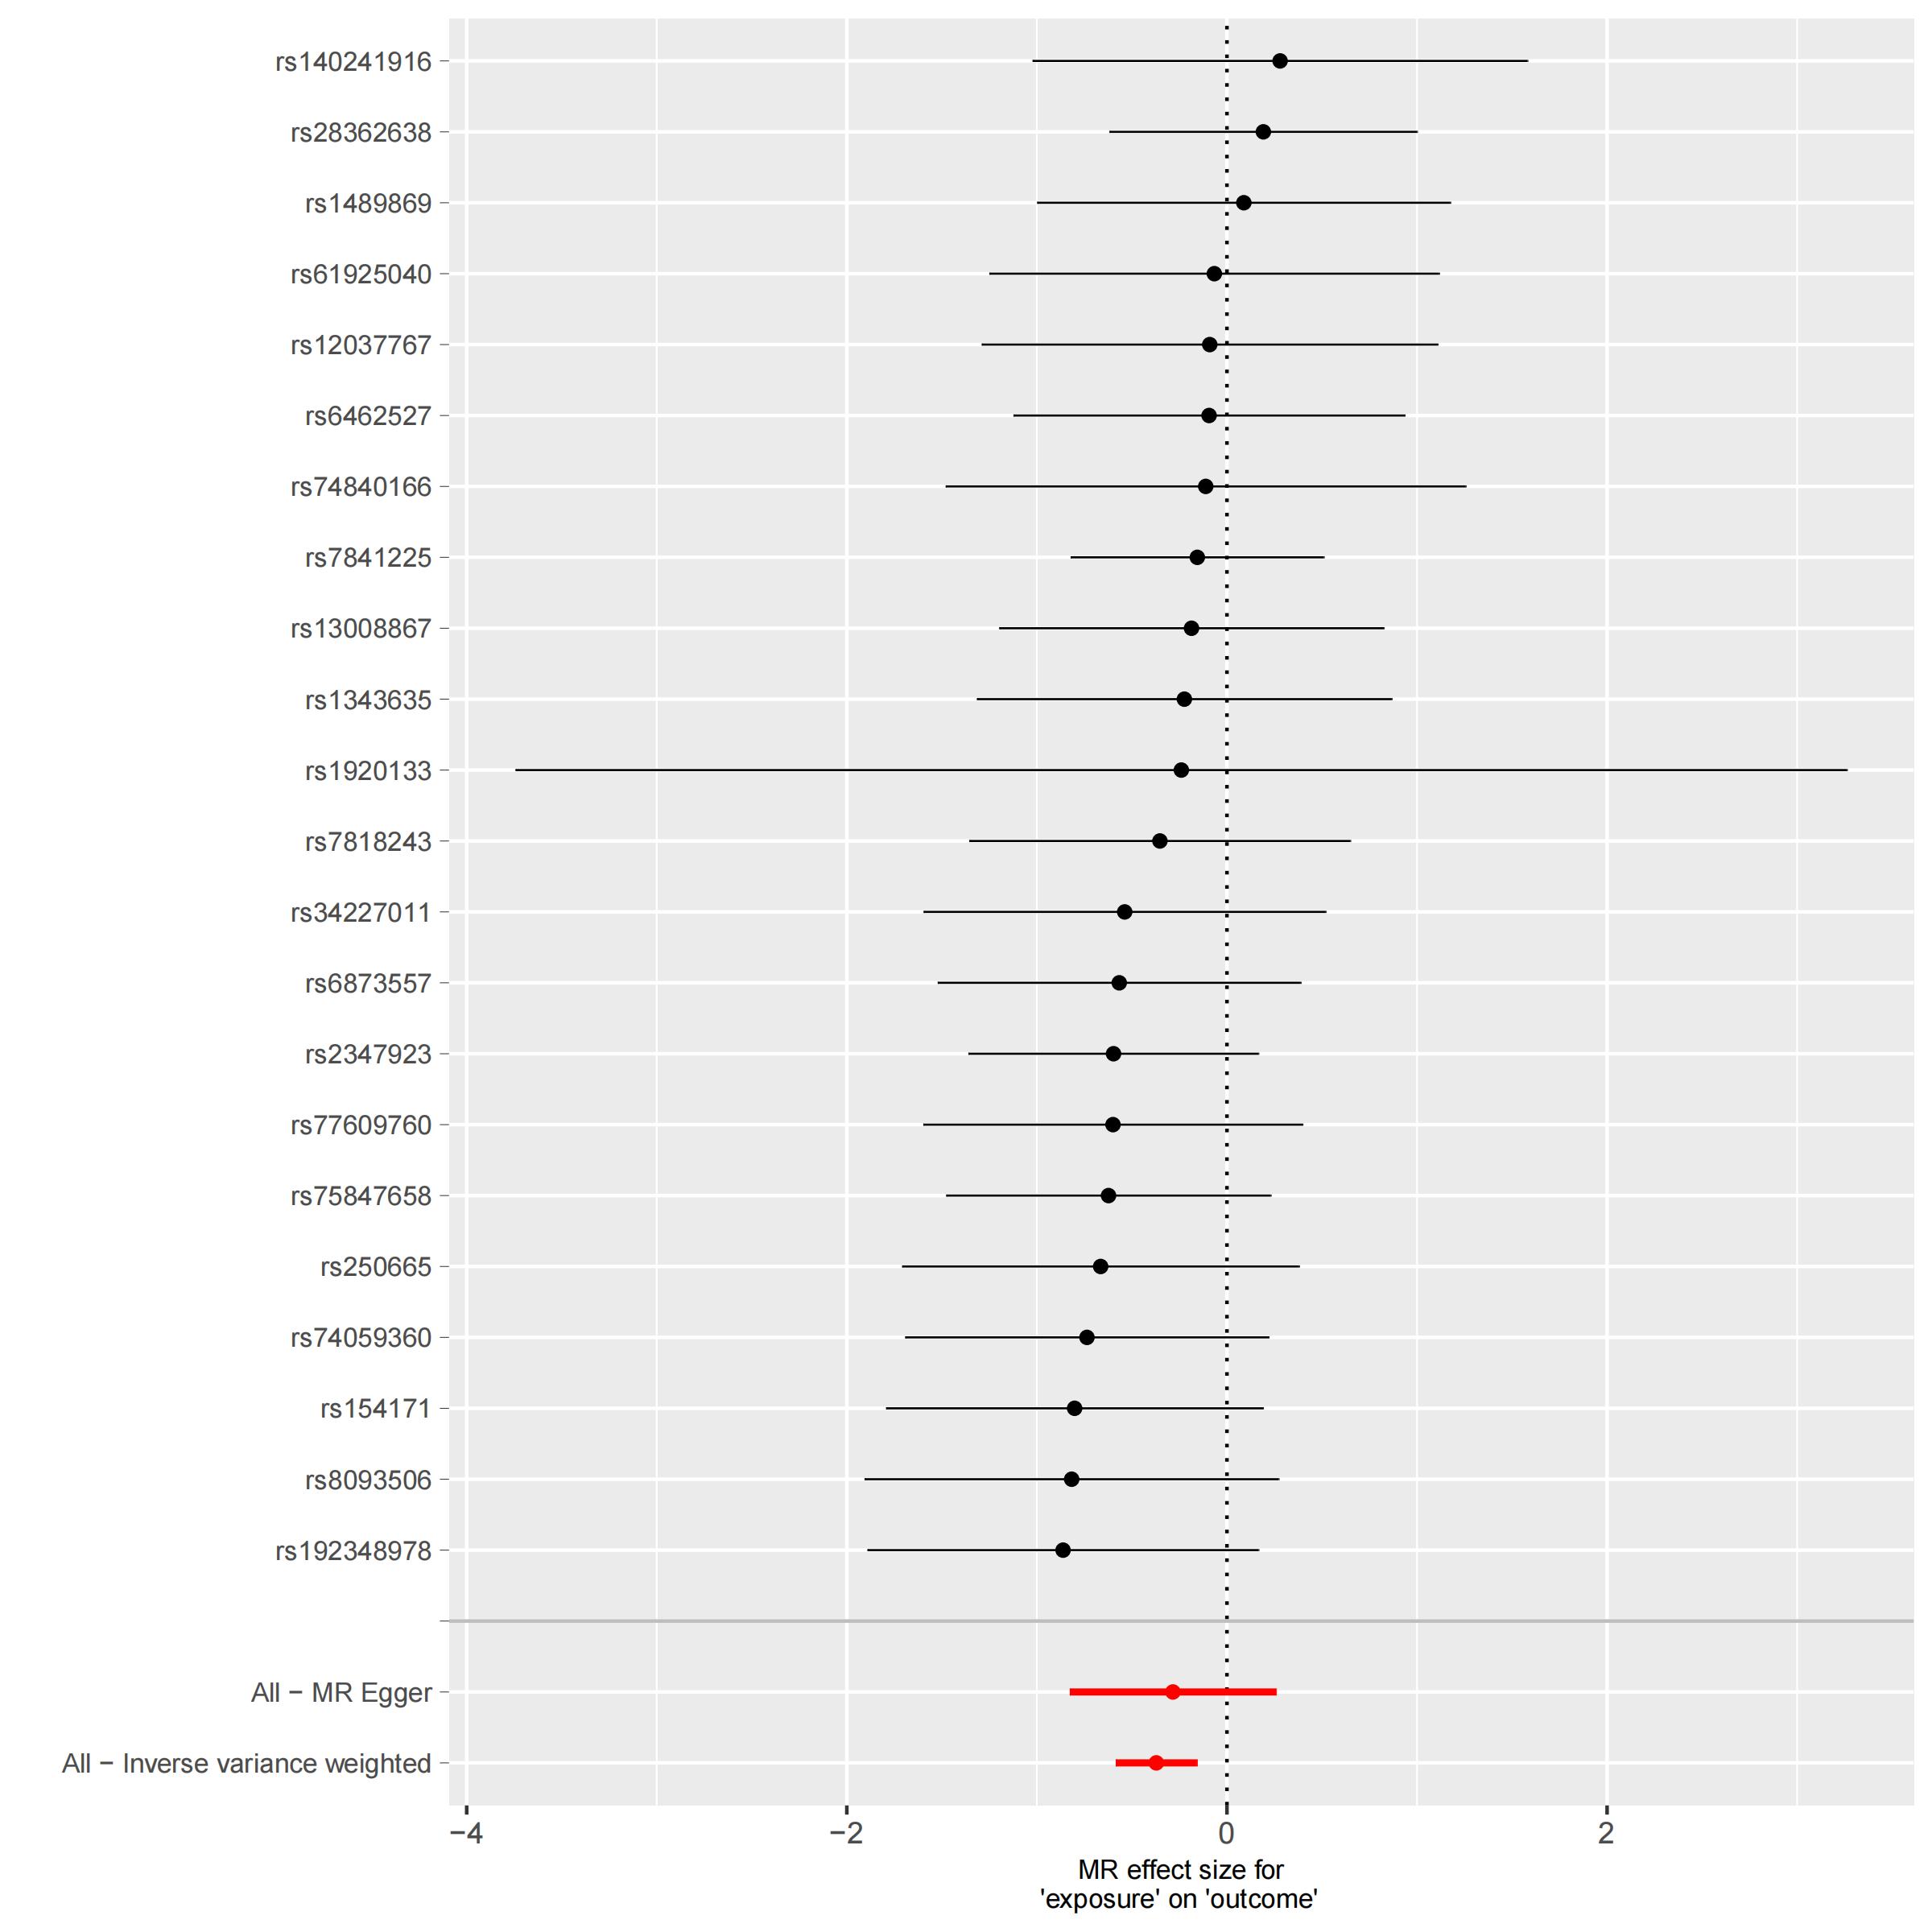


**Figure S4 Forest Plot of the MR Effect of PPD on CSF Metabolites.**

The Black dots represent the estimated effects of individual SNPs on Maleate levels in CSF, with their associations to PPD risk.The black lines denote the corresponding 95% confidence intervals for these SNP-specific estimates. The red dots the pooled causal effects of PPD on Maleate metabolite risk, as derived through MR analyses using both MR-Egger and IVW regression approaches.

**A**  **B**


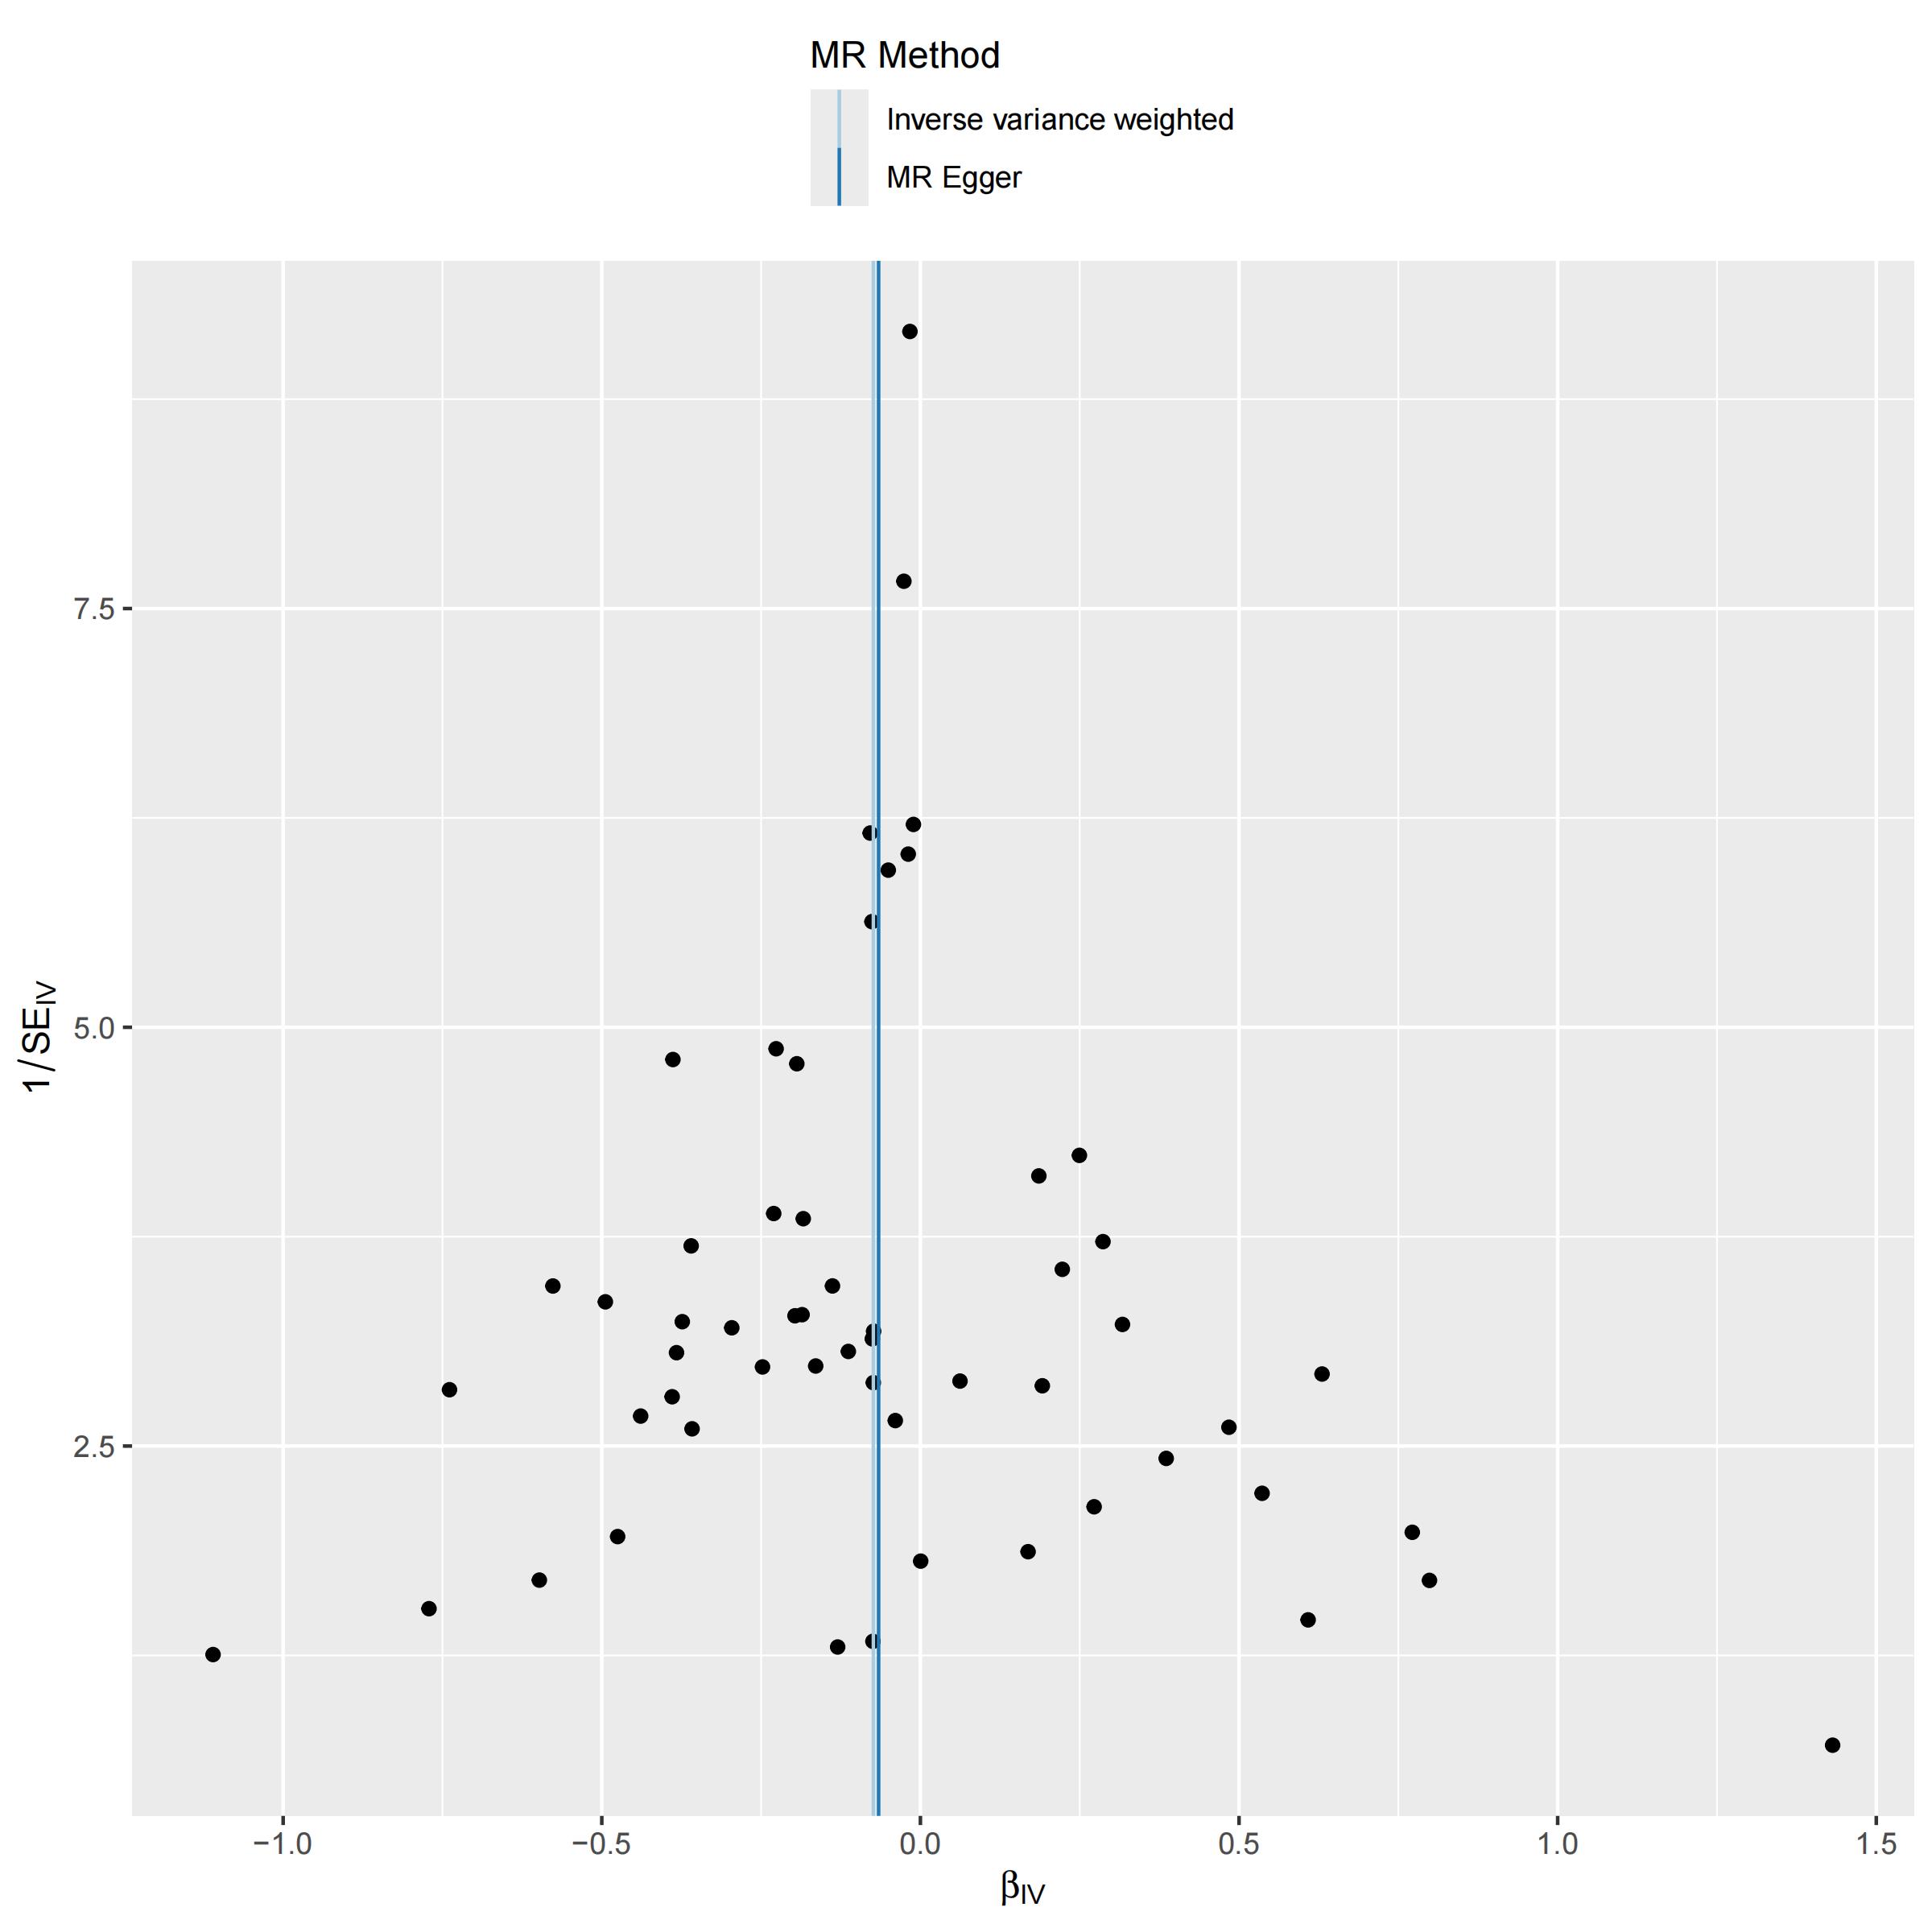

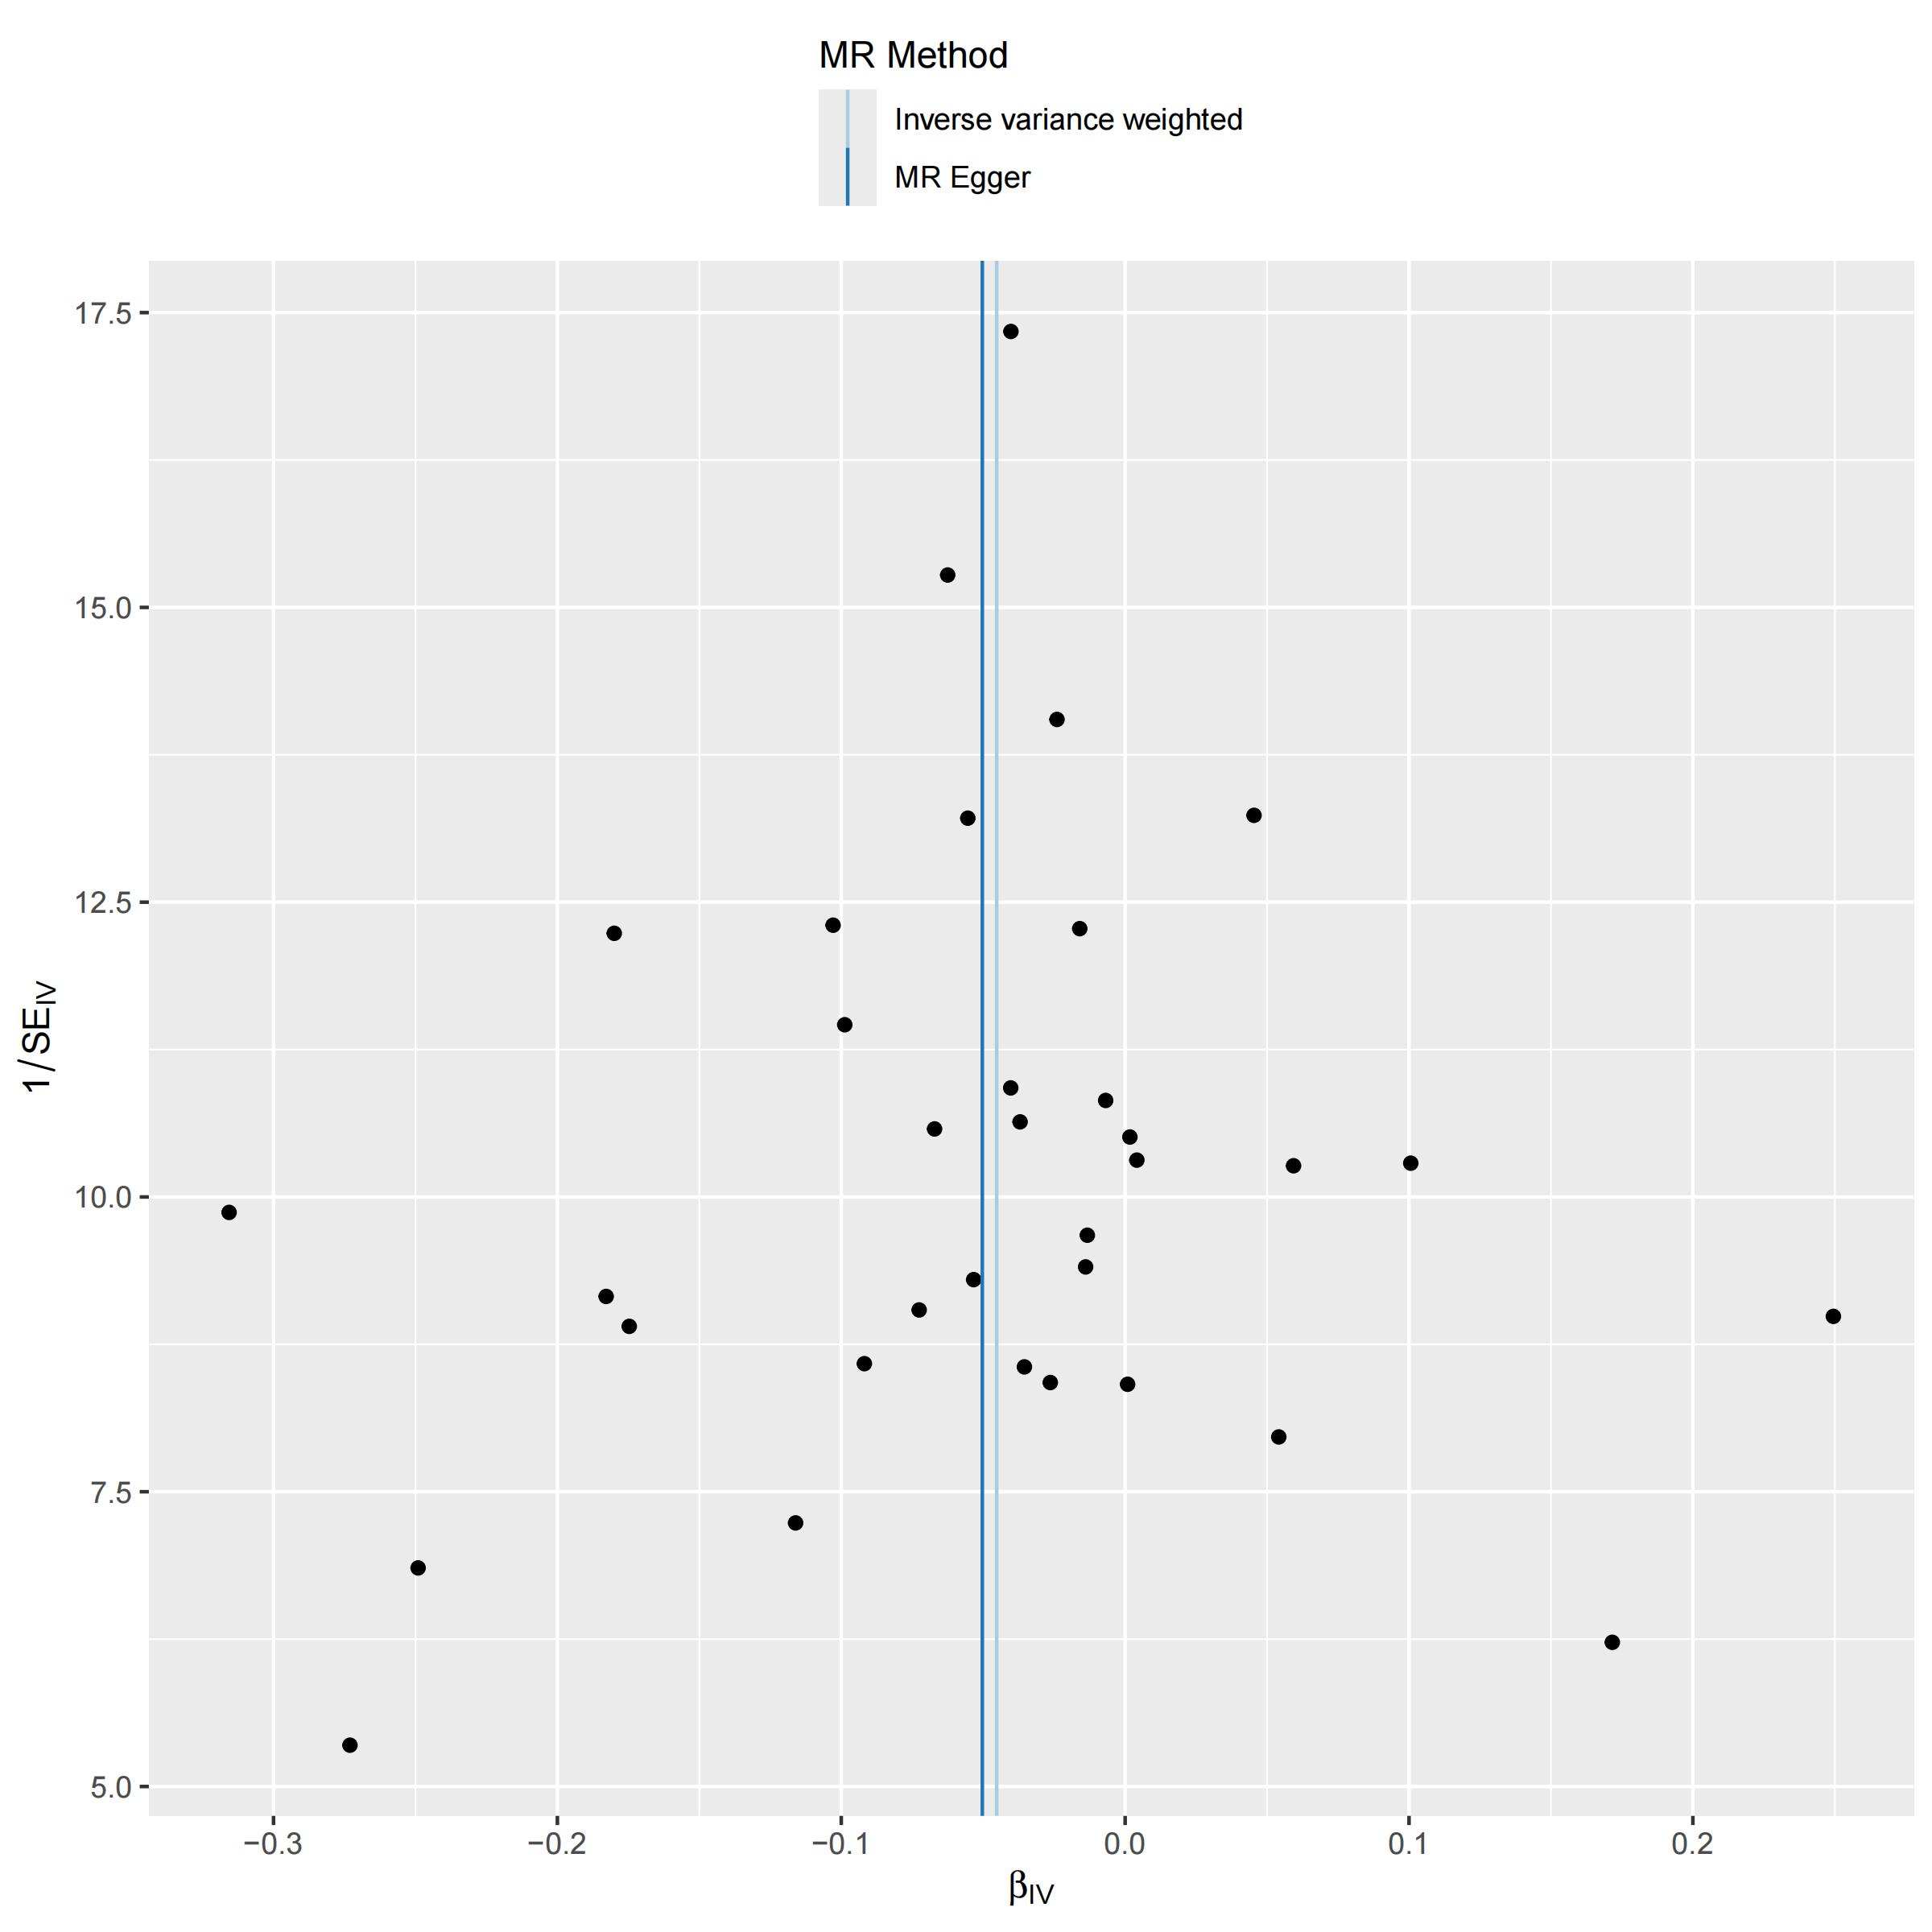


**C**  **D**


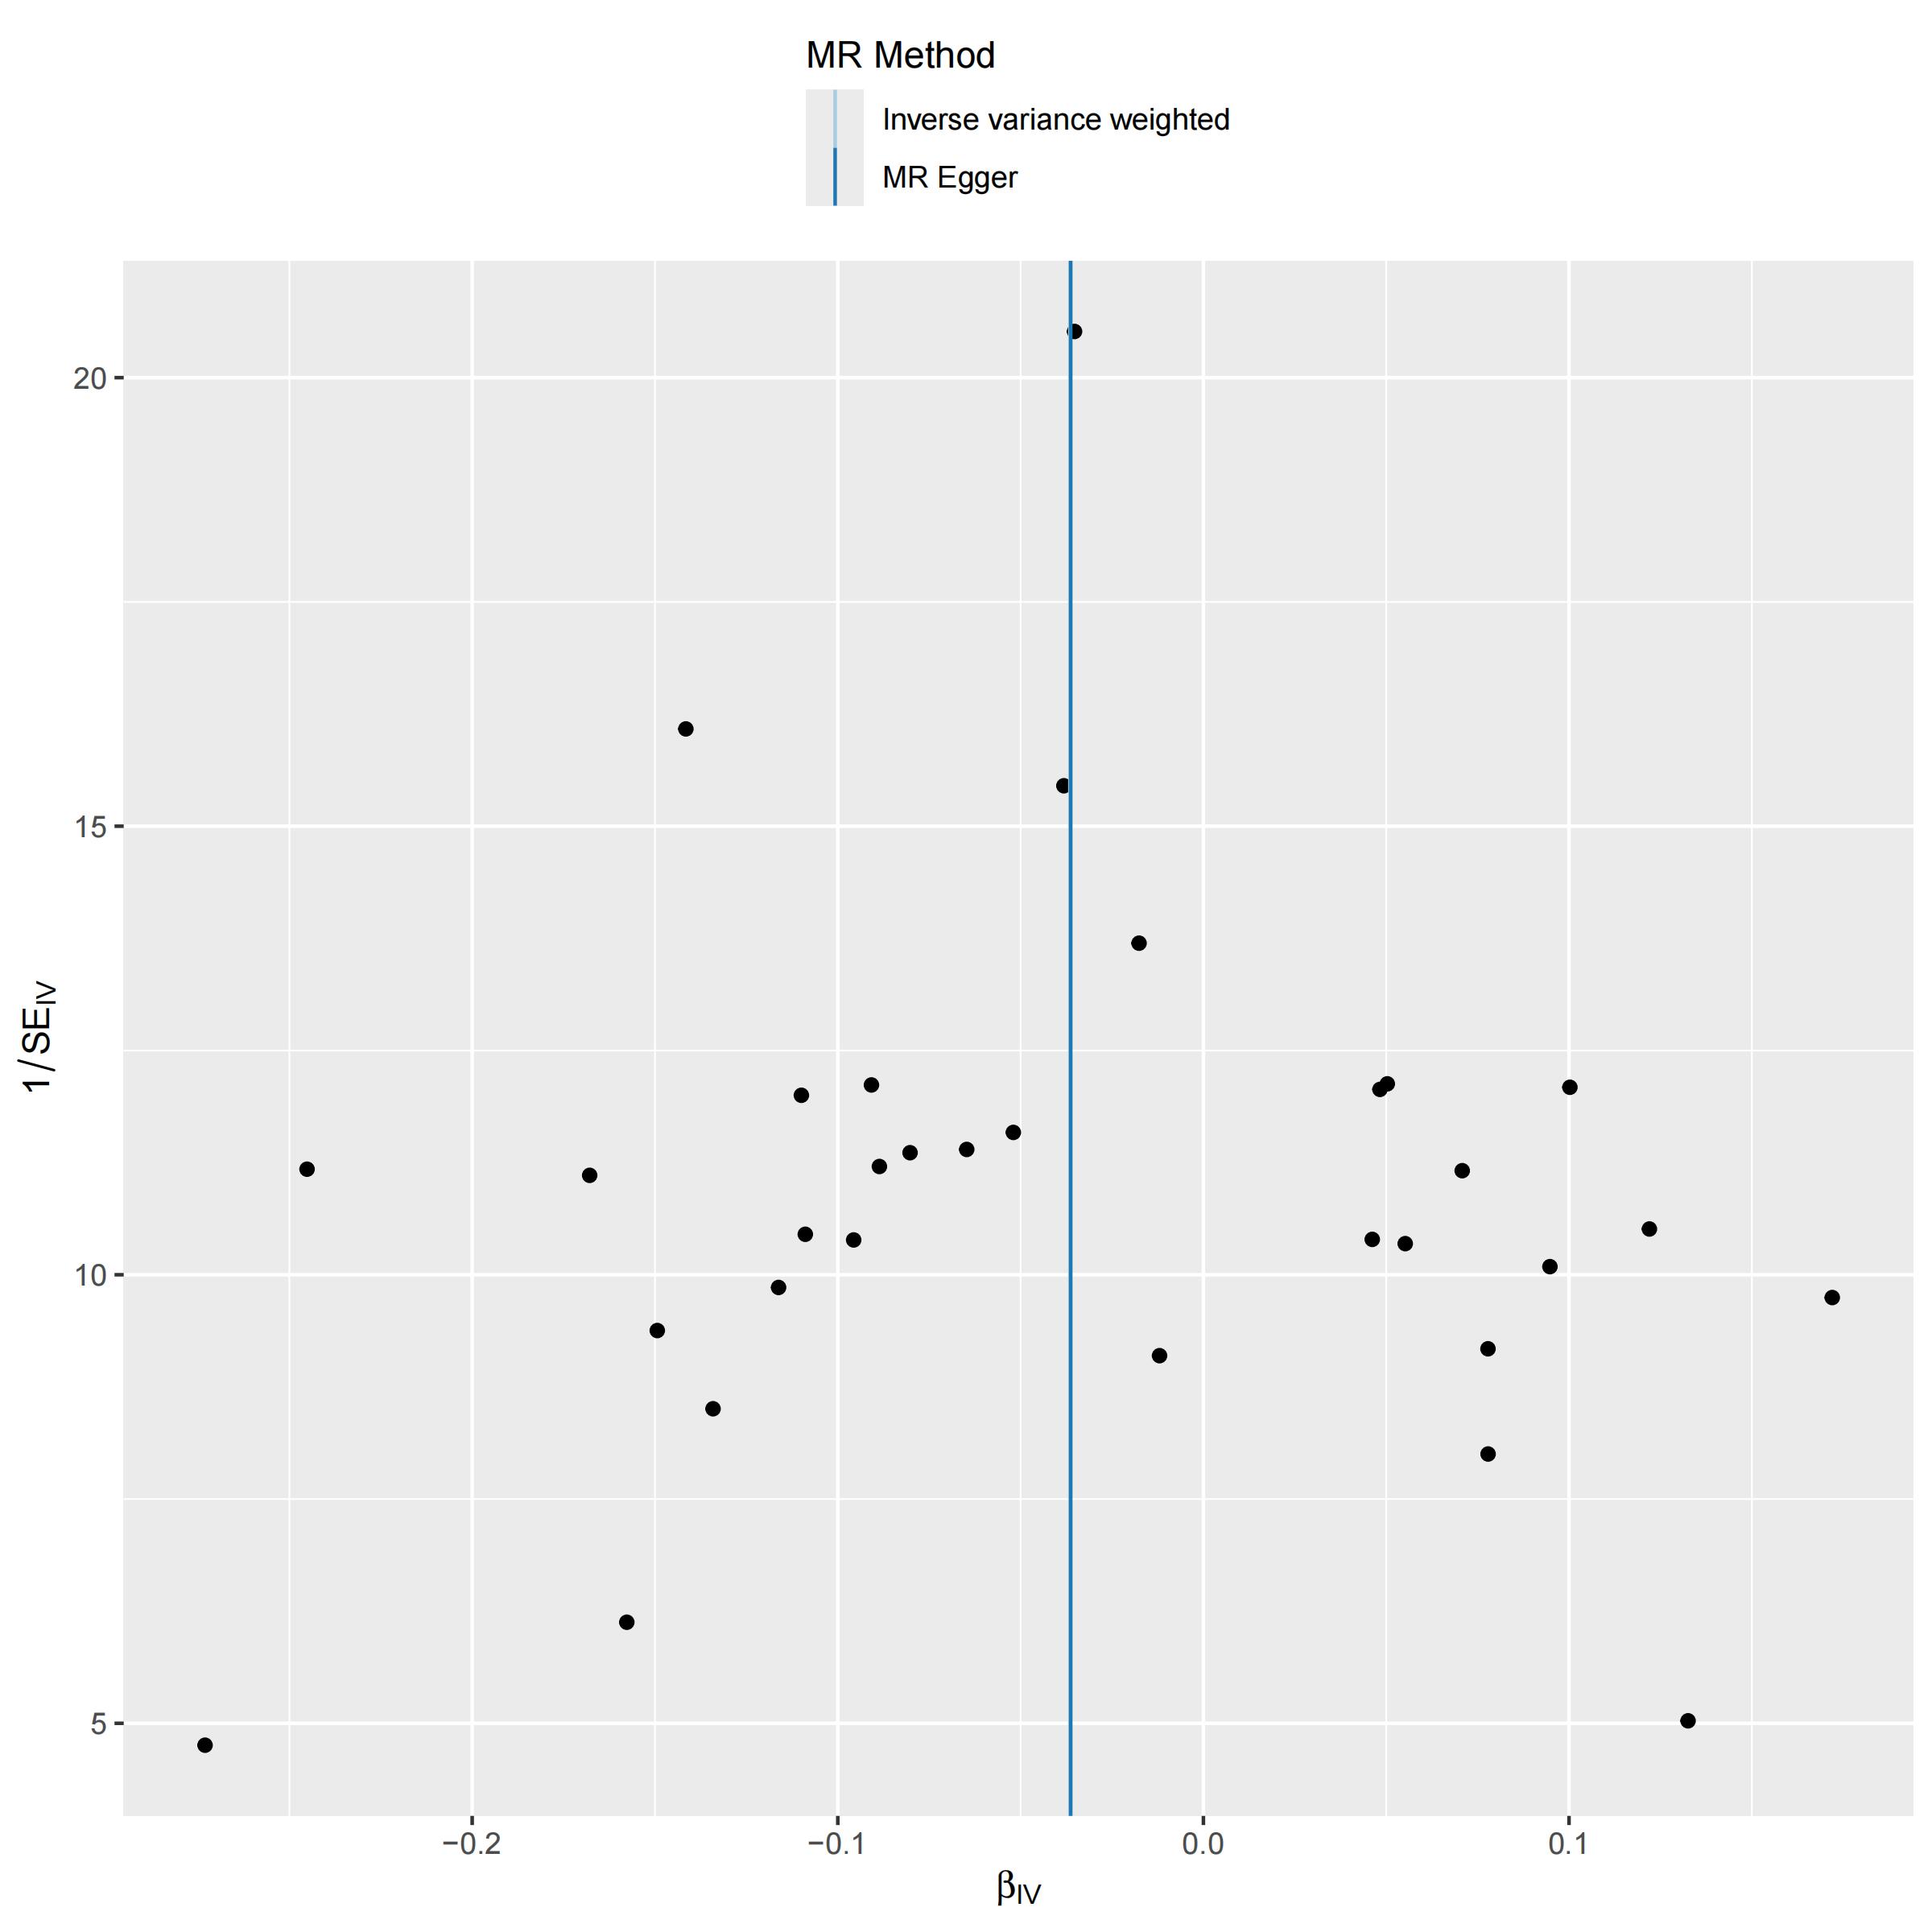

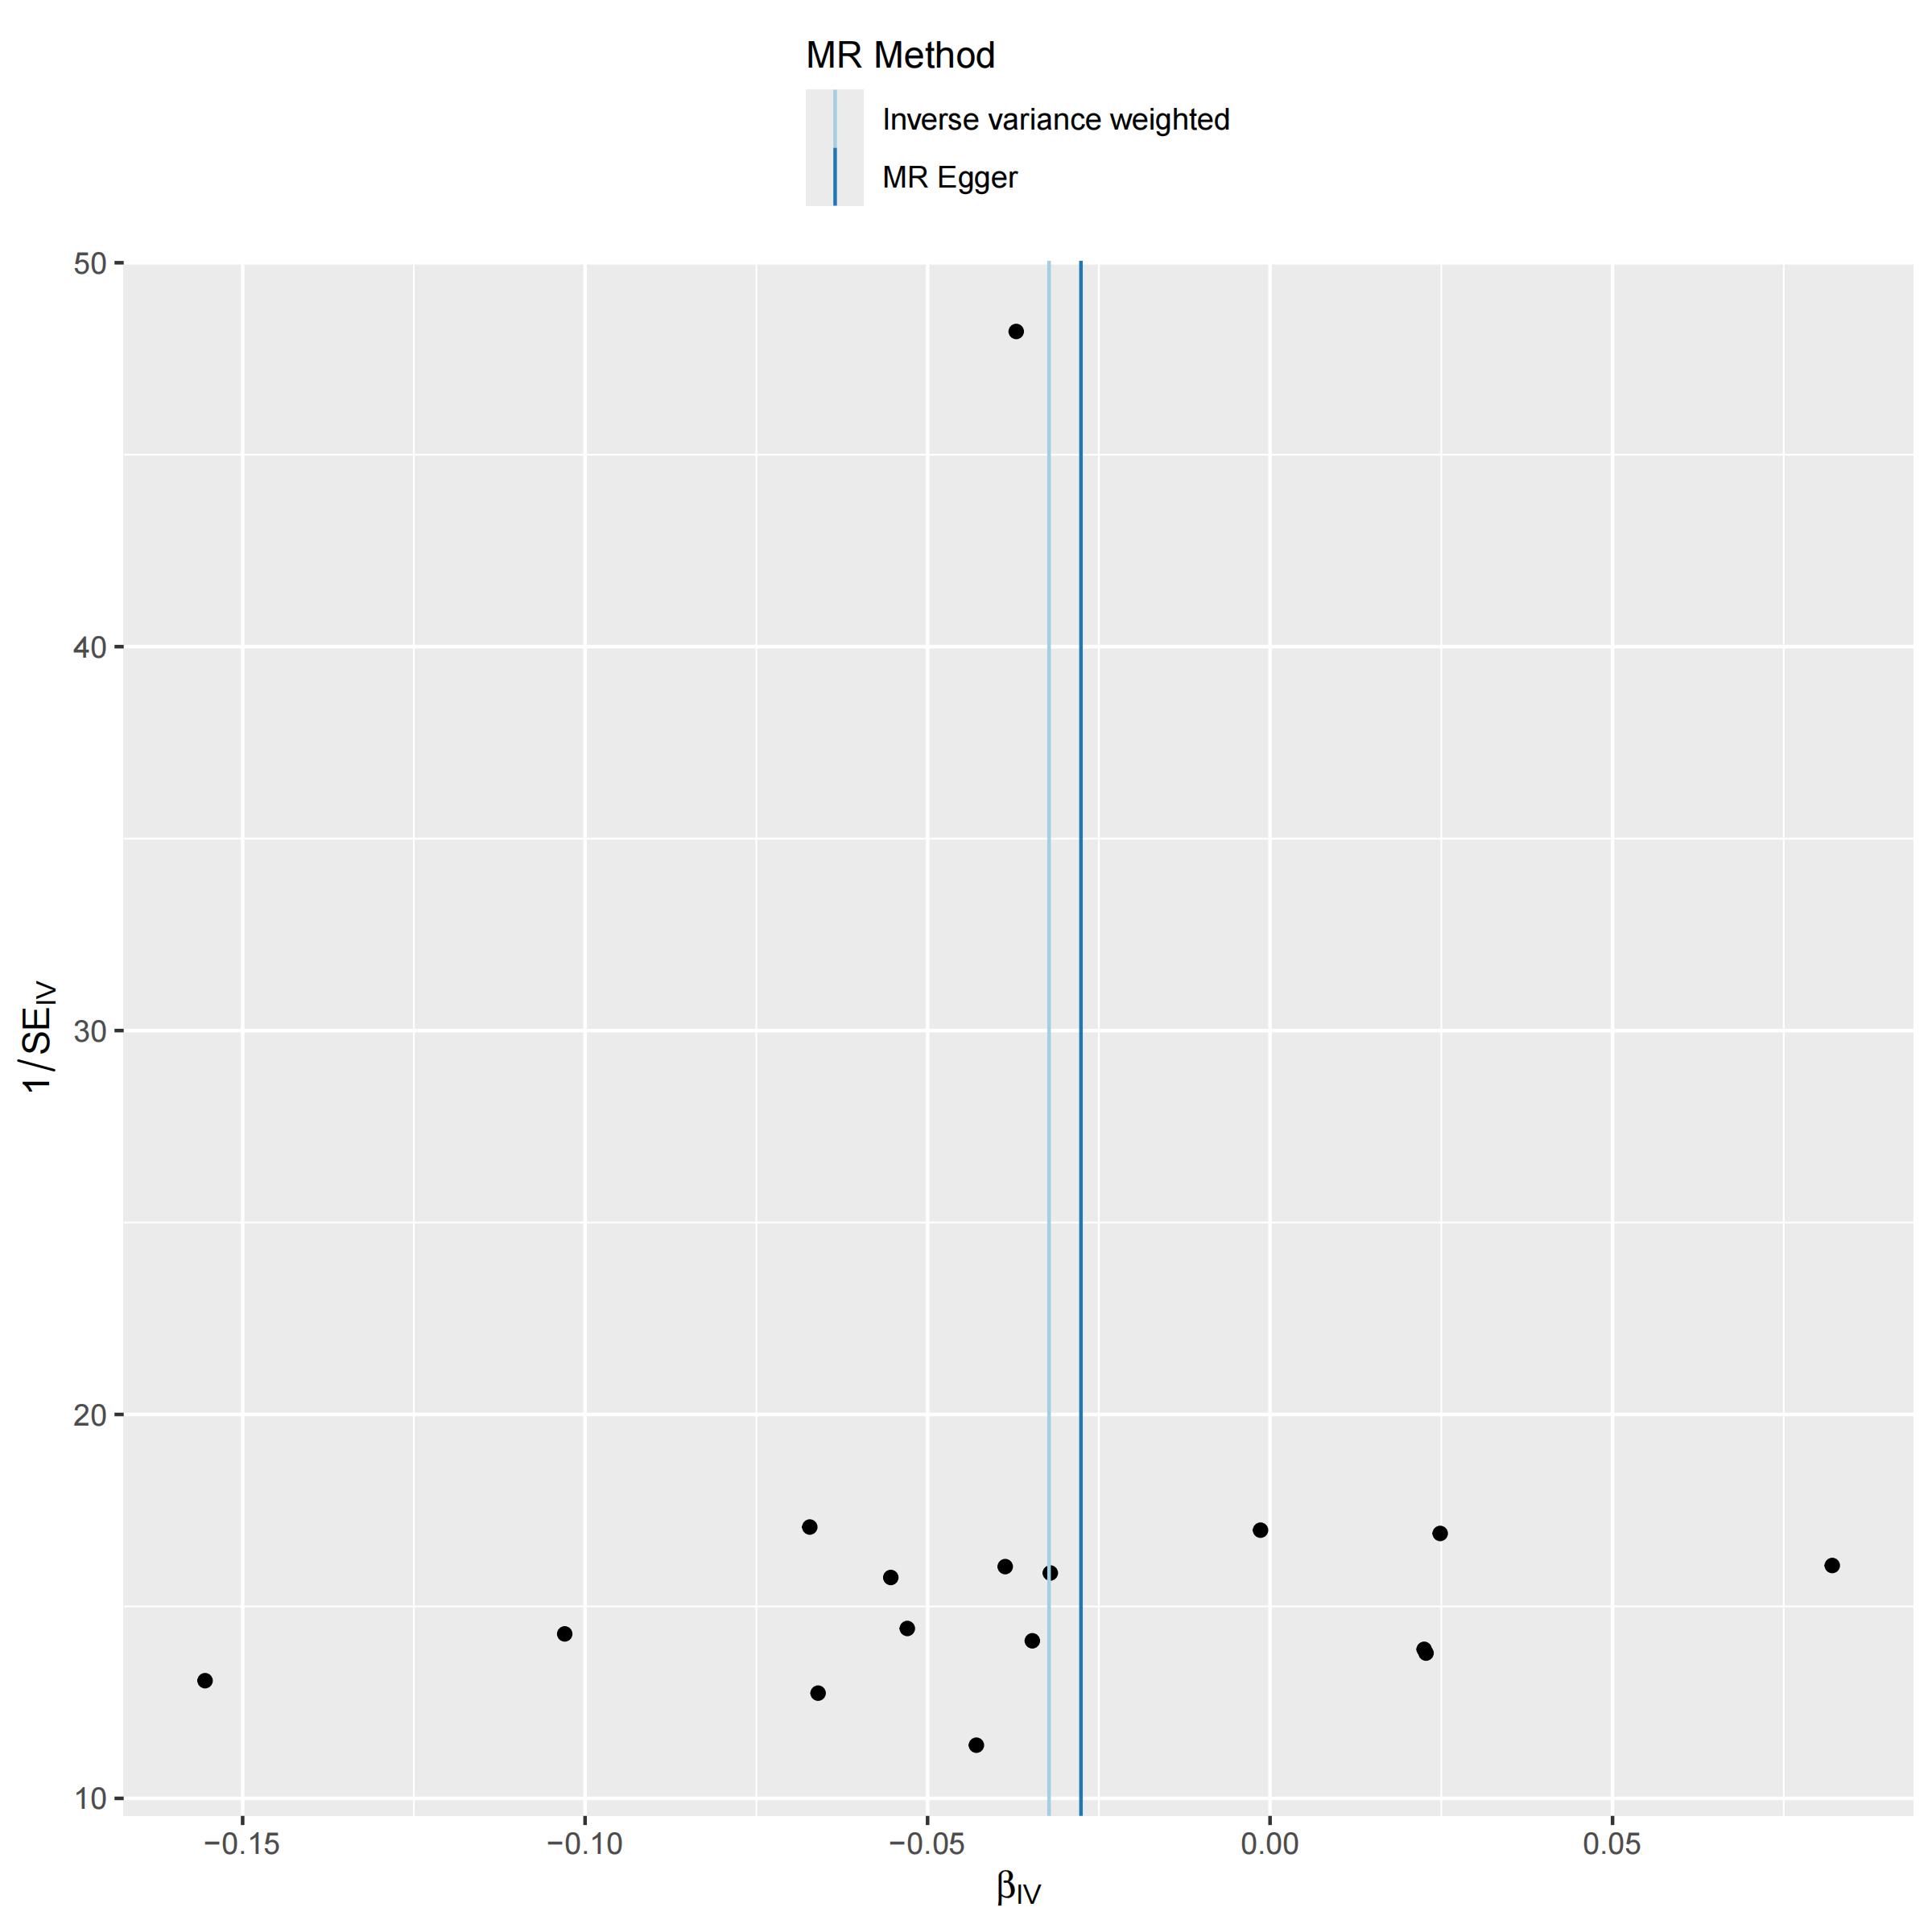


**E**   **F**


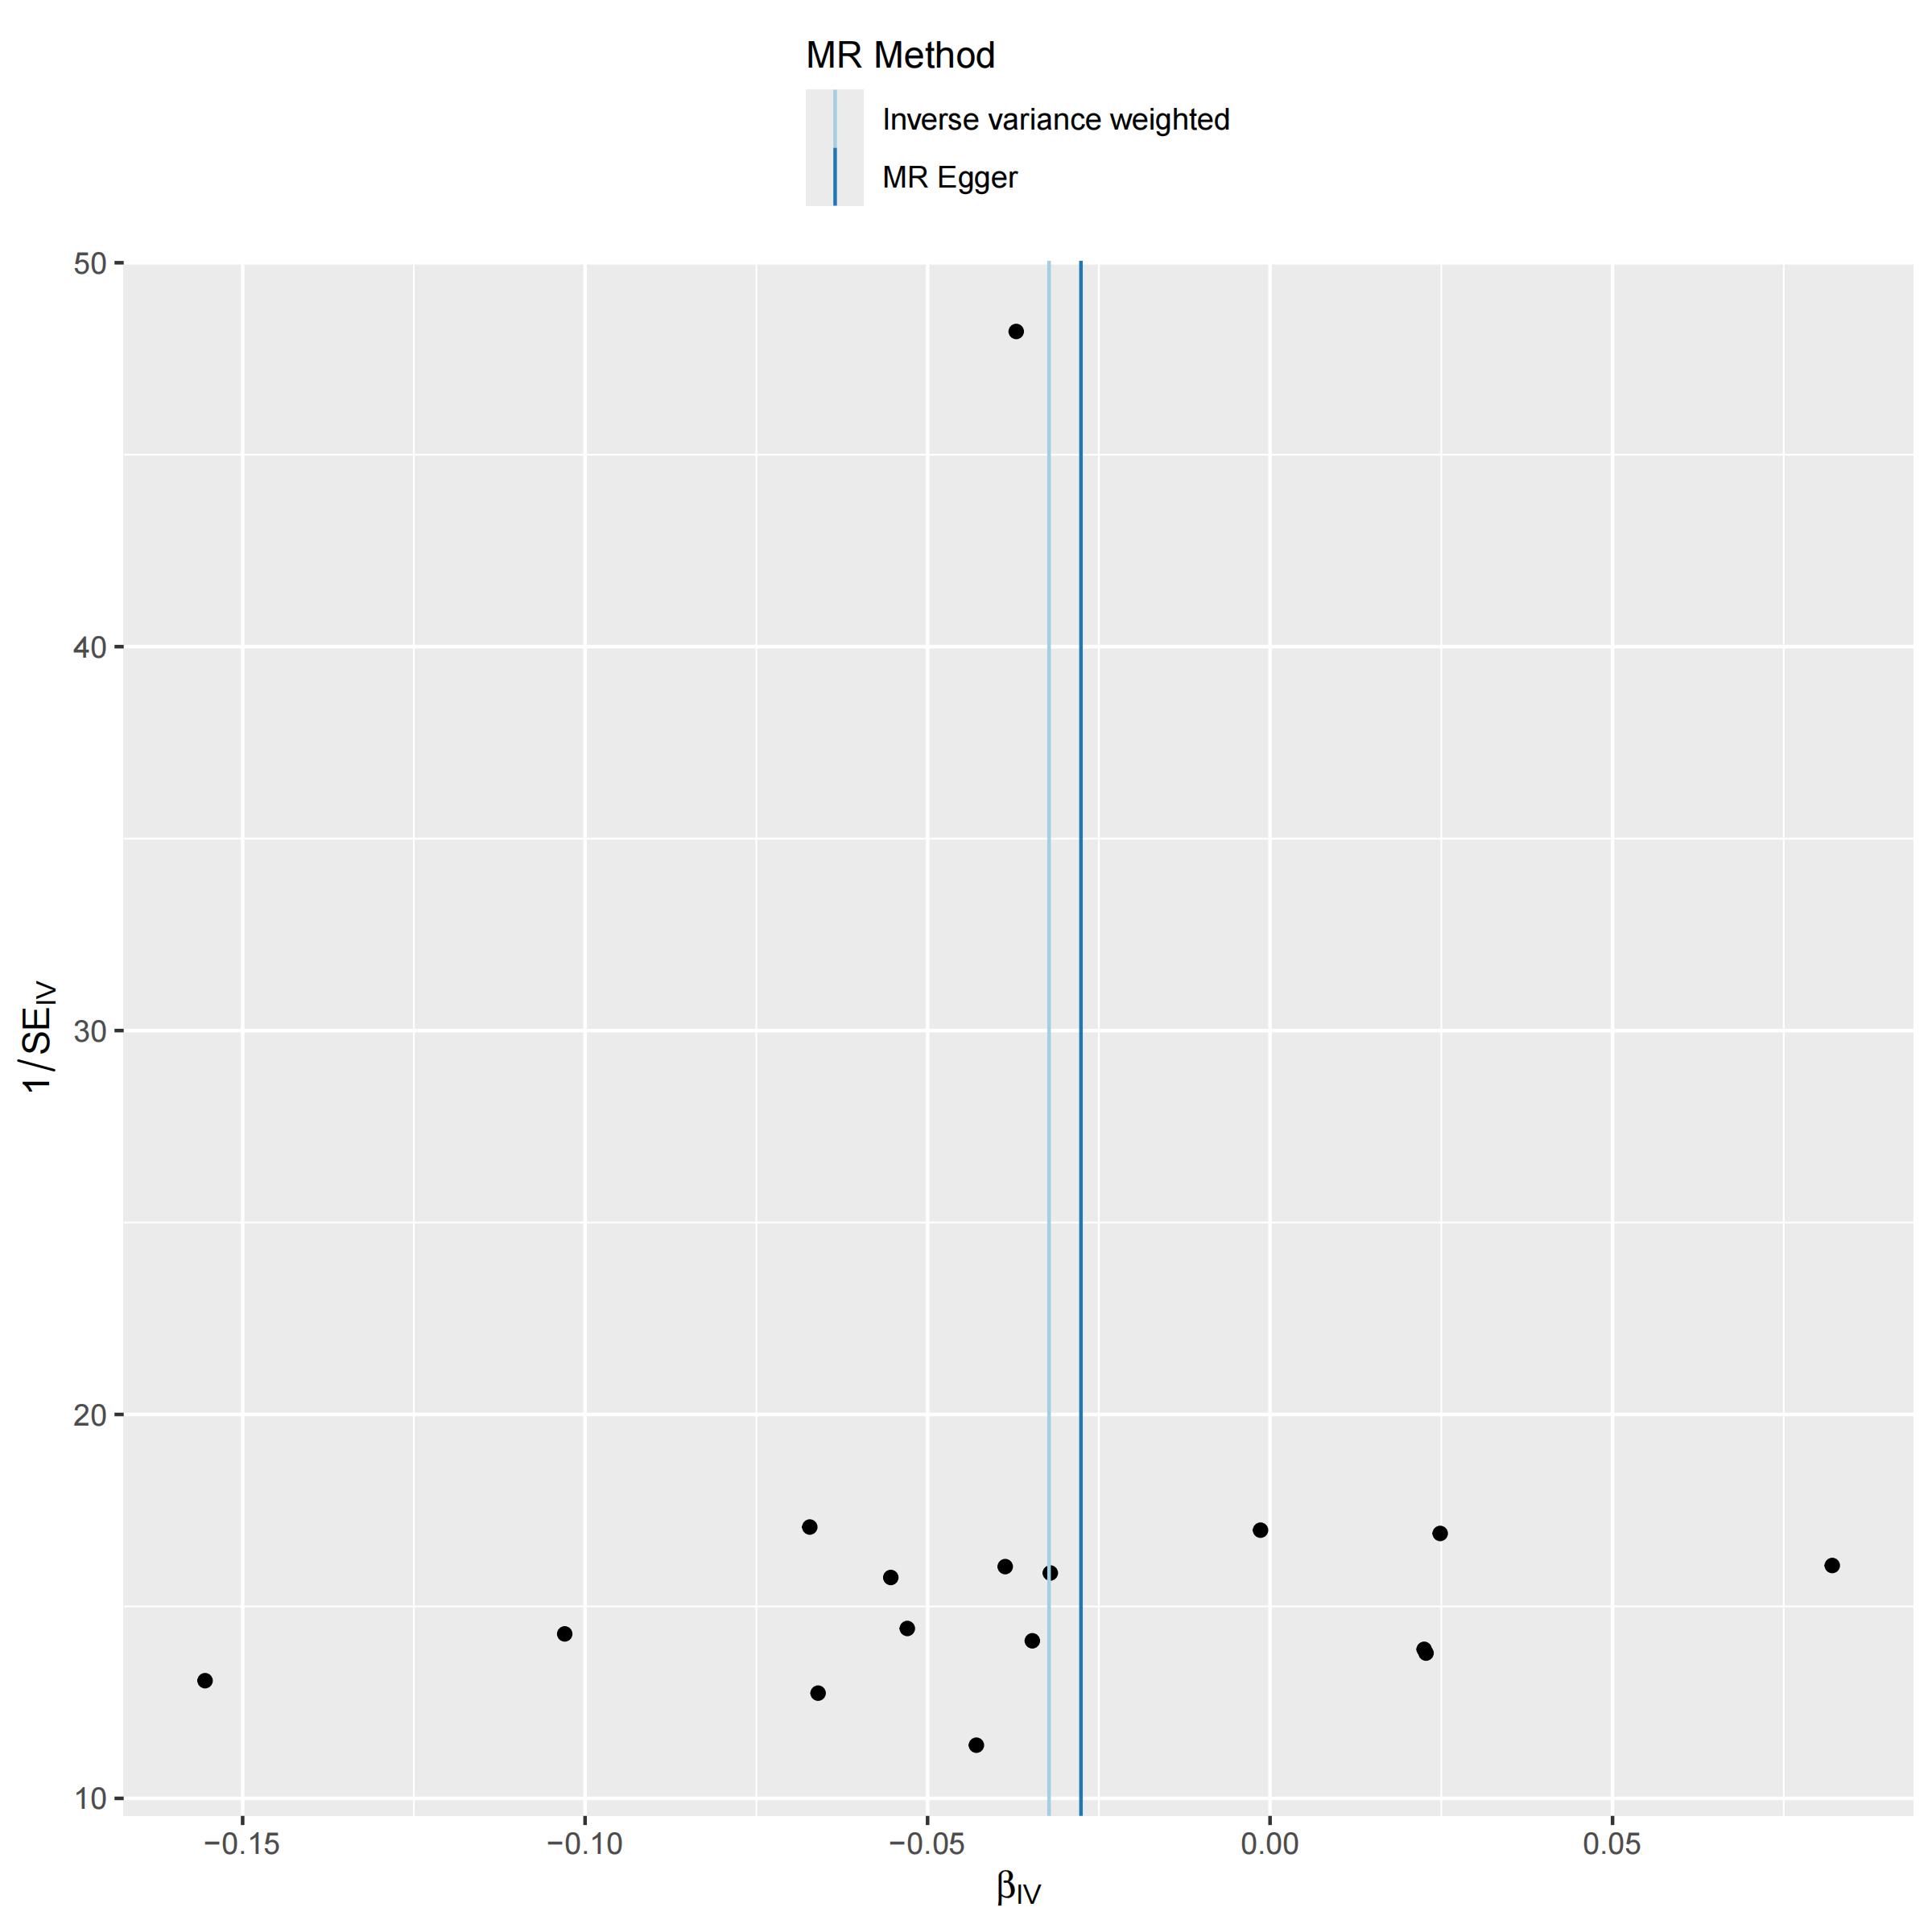

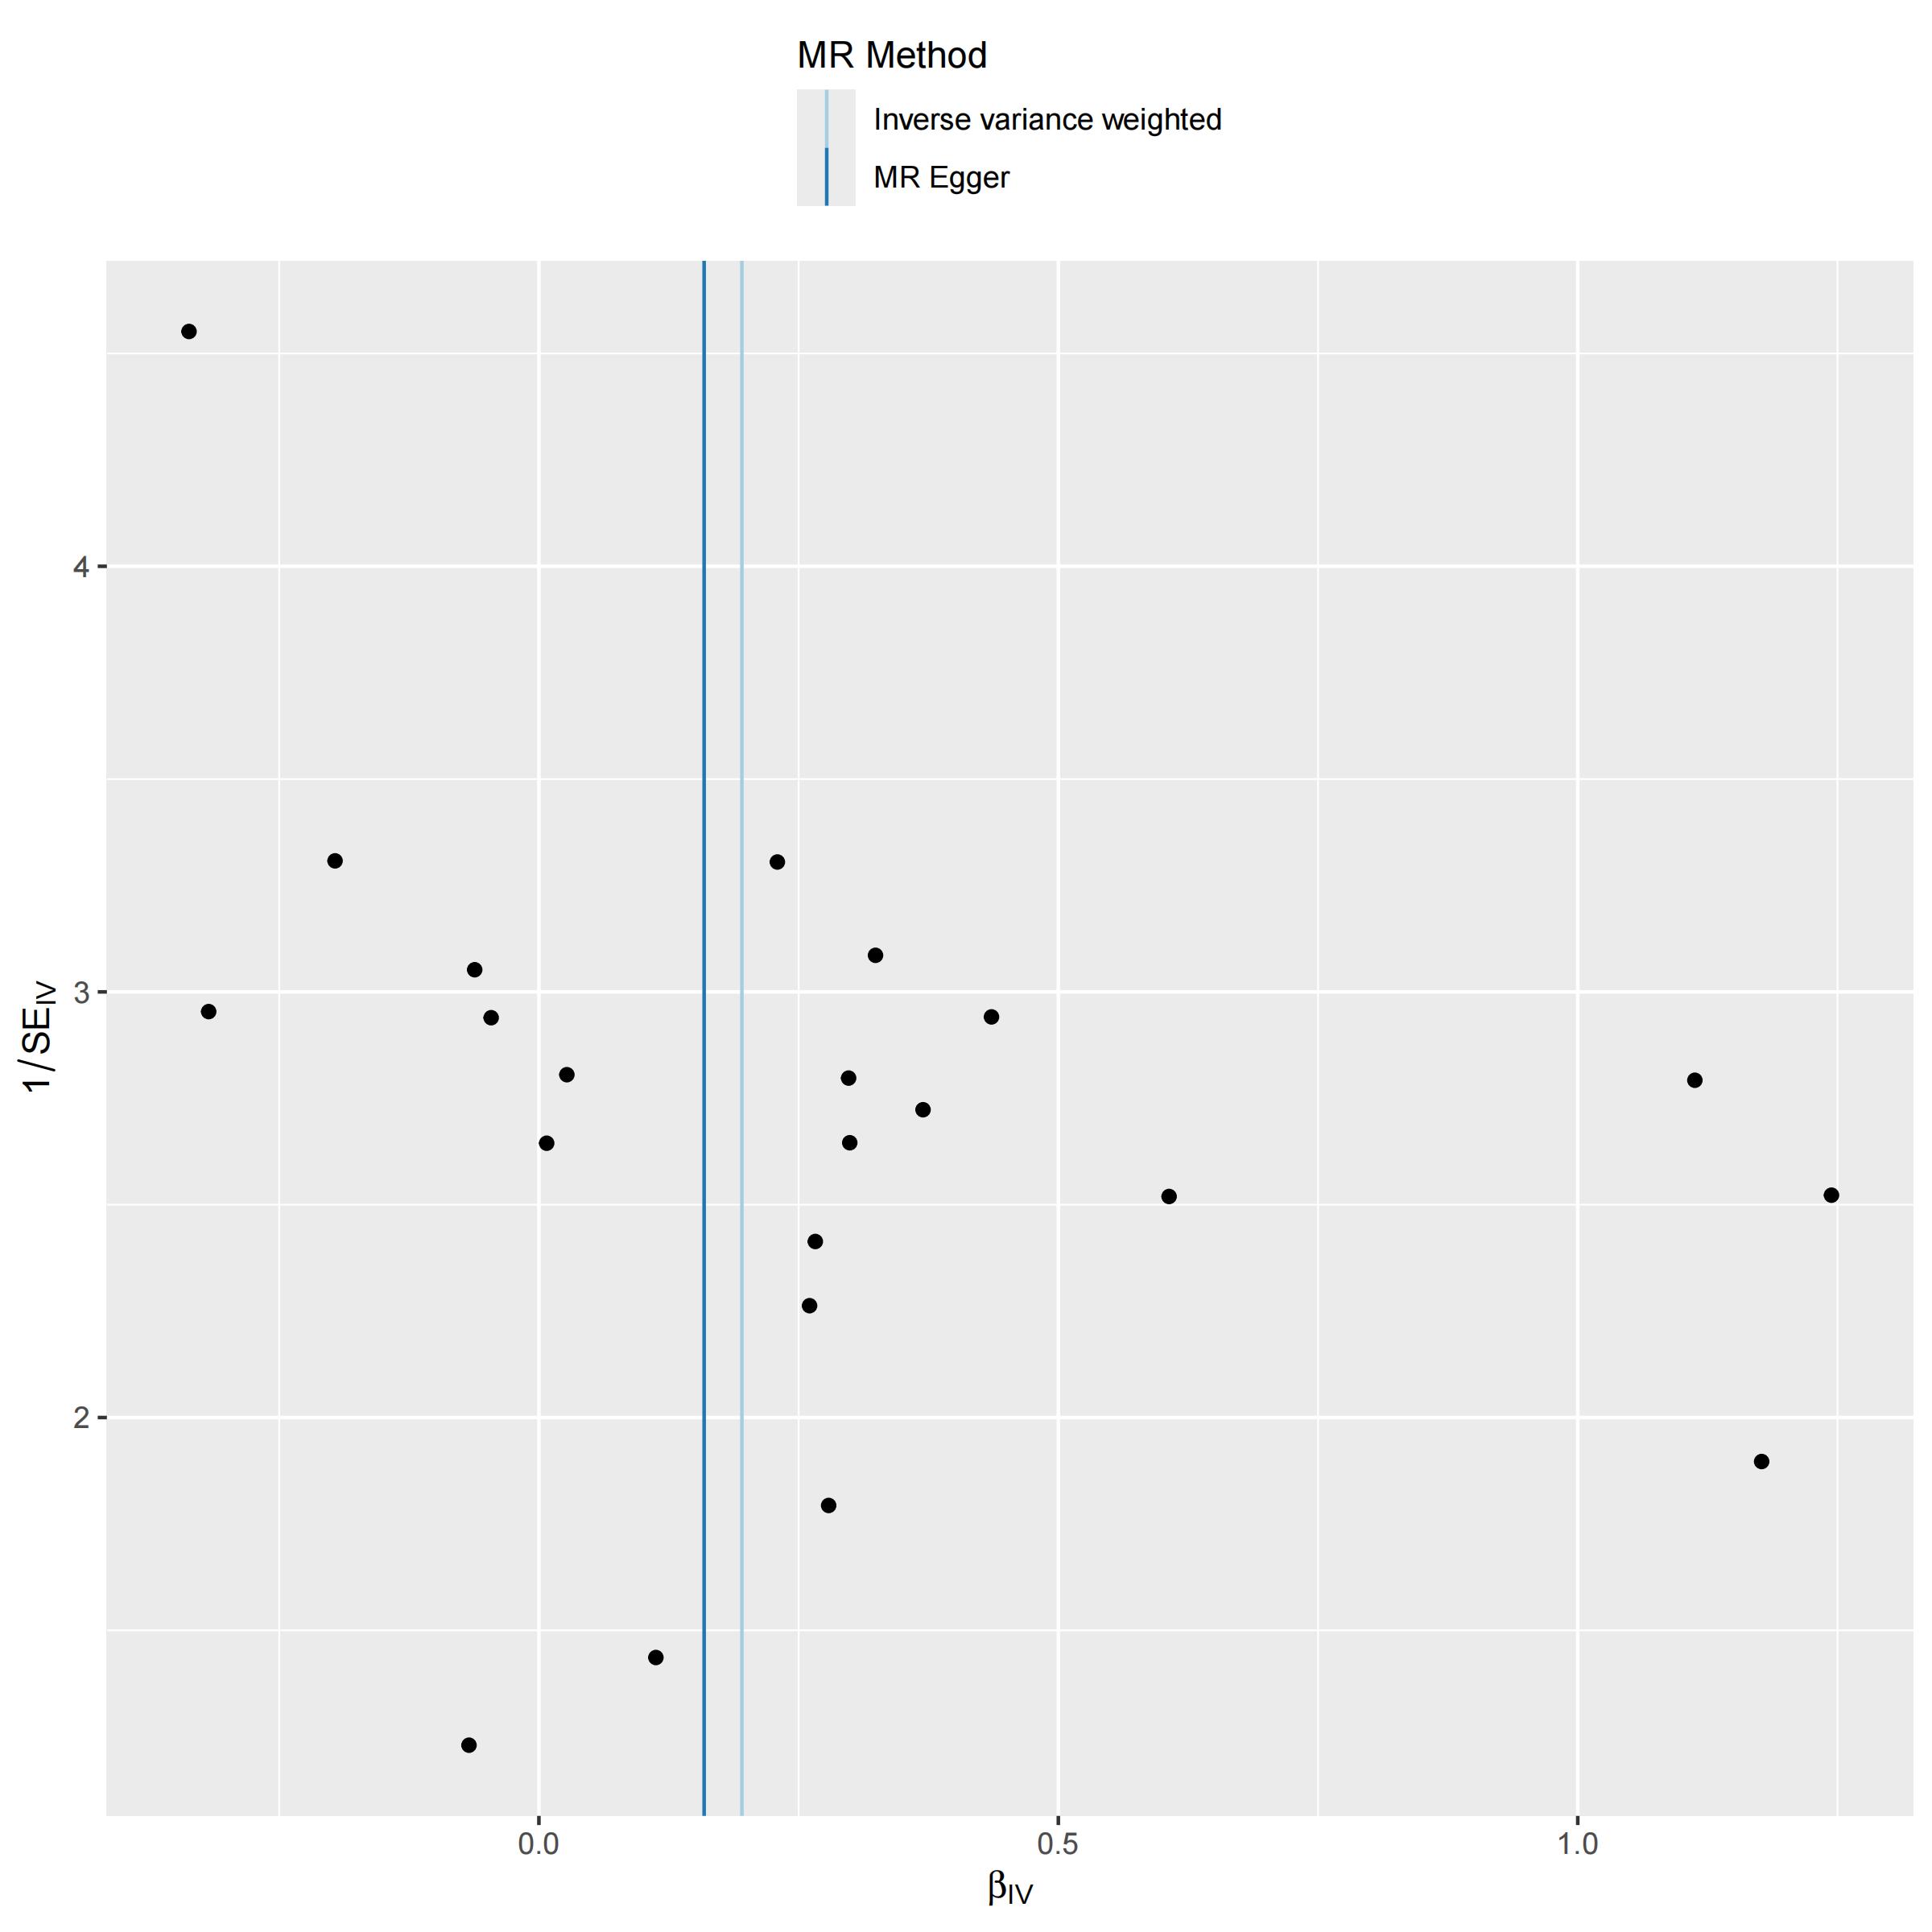


**G**   **H**


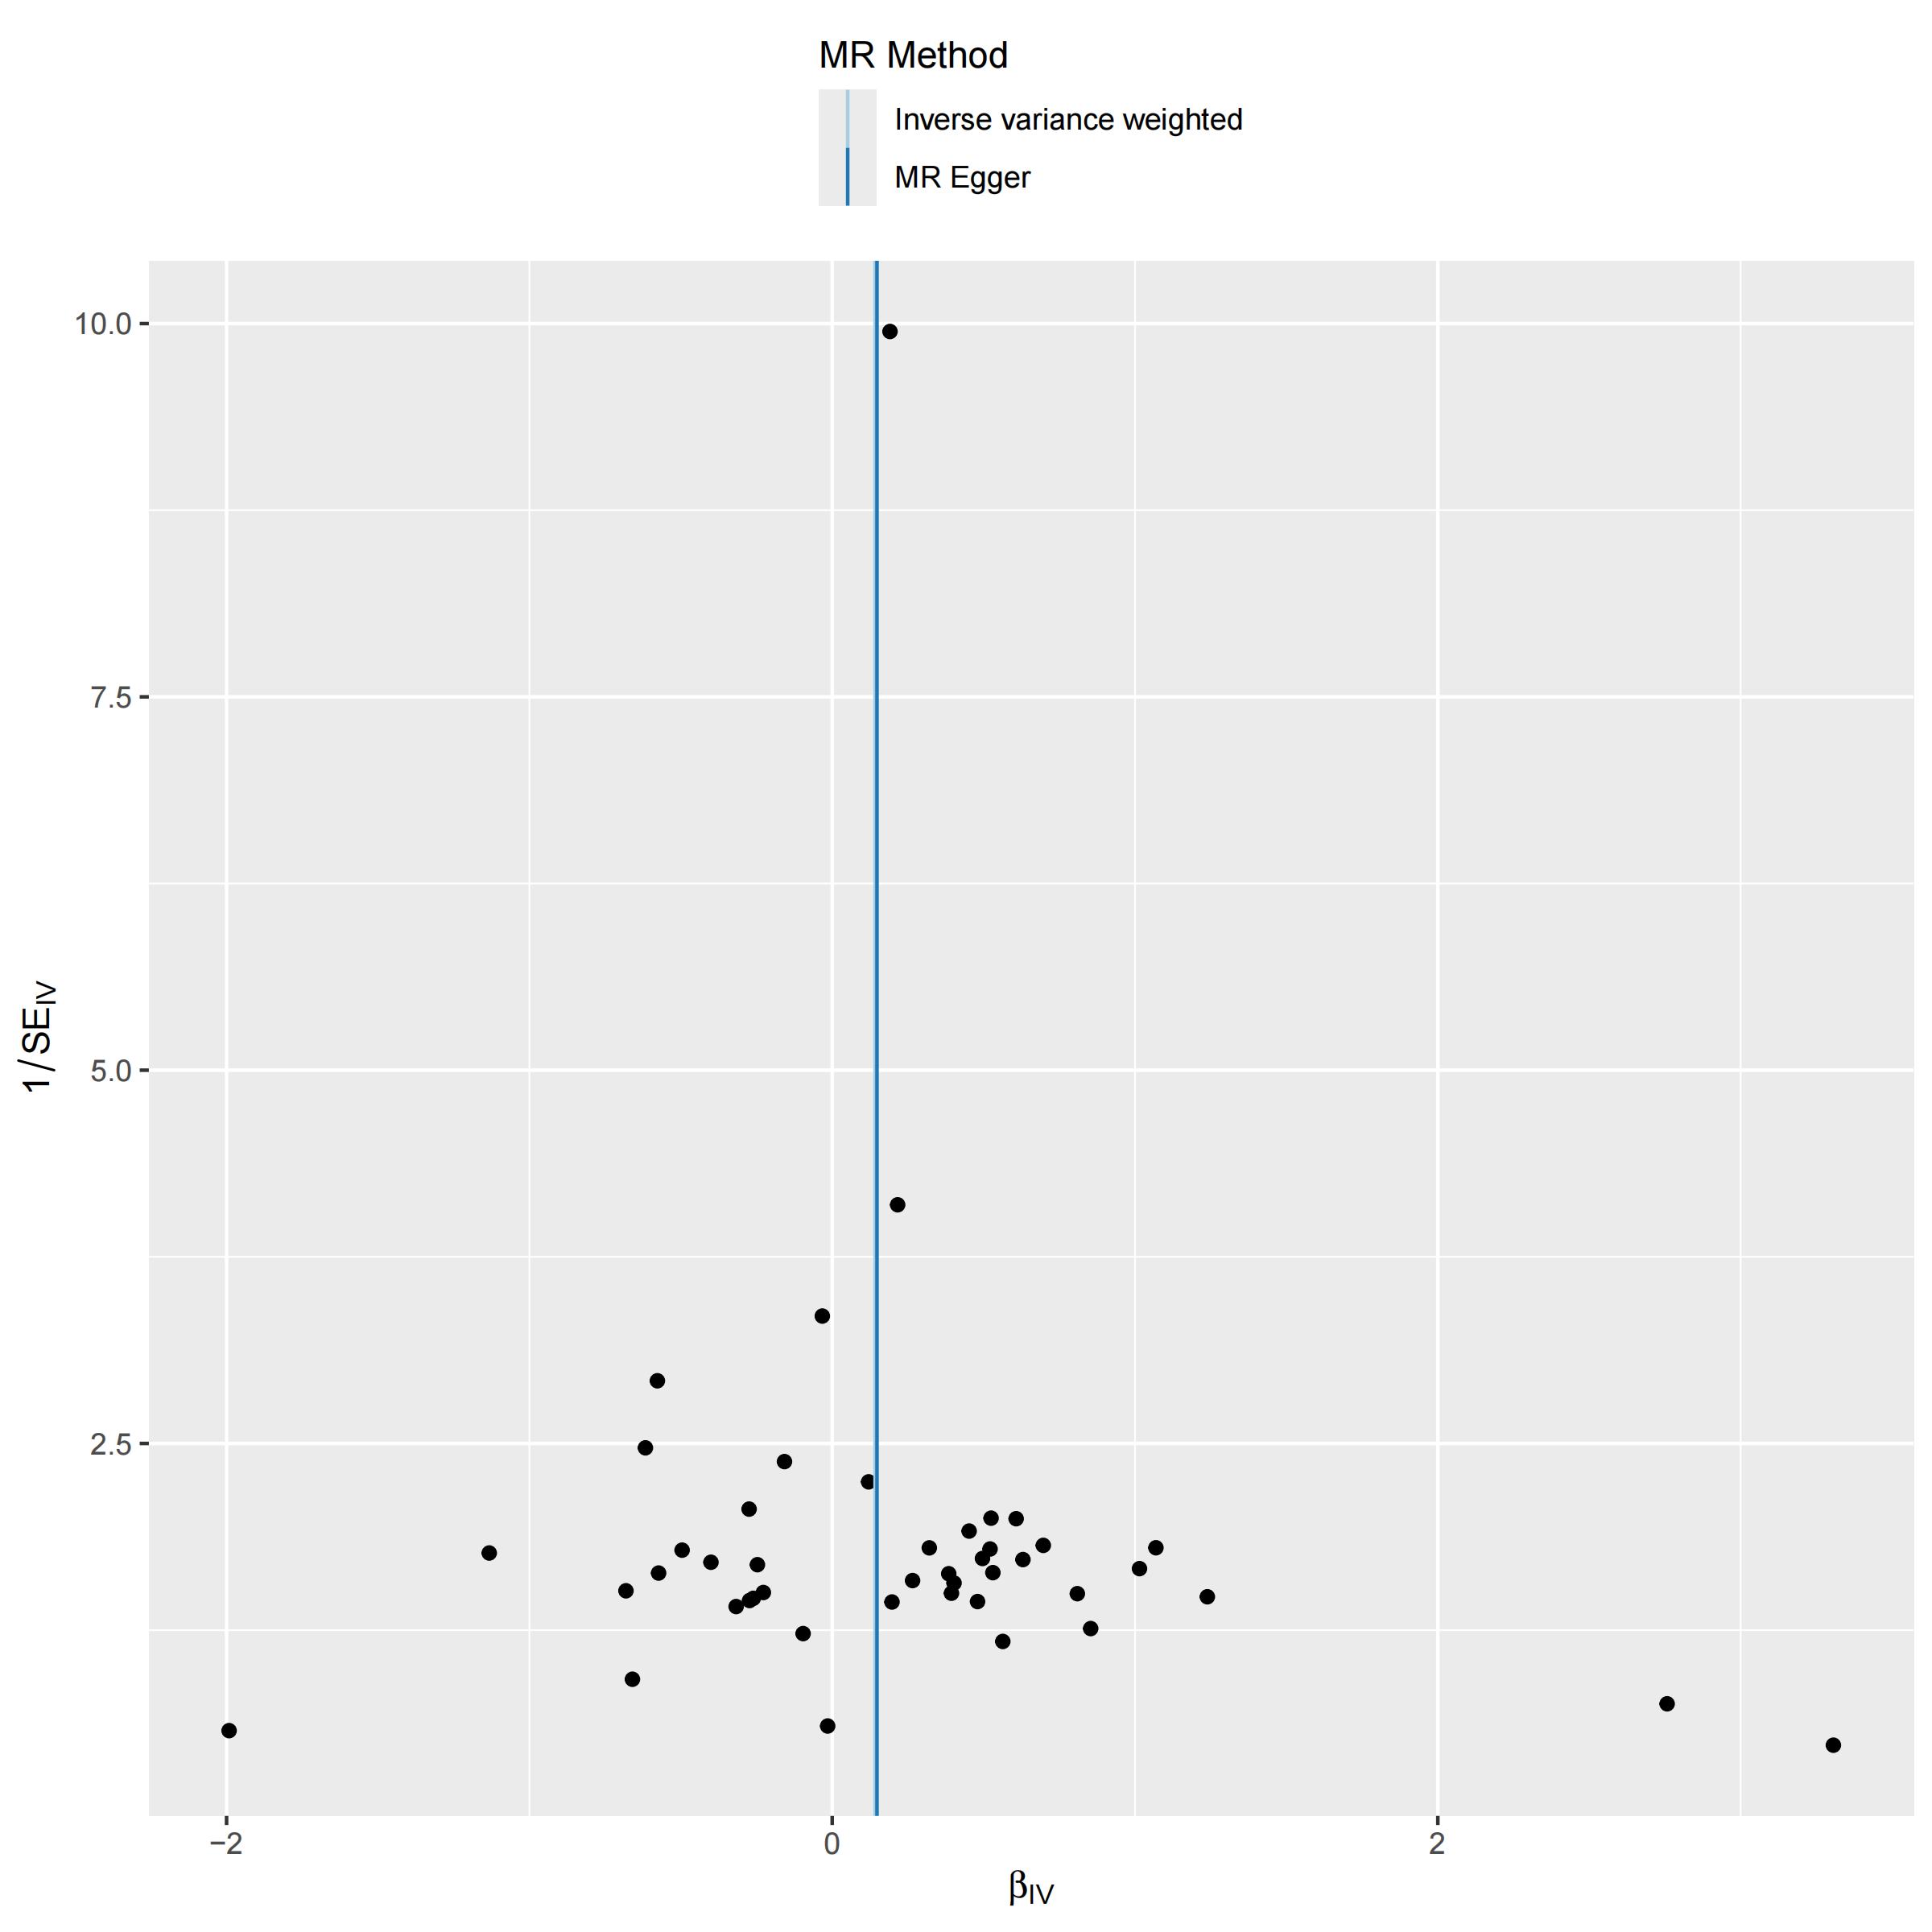

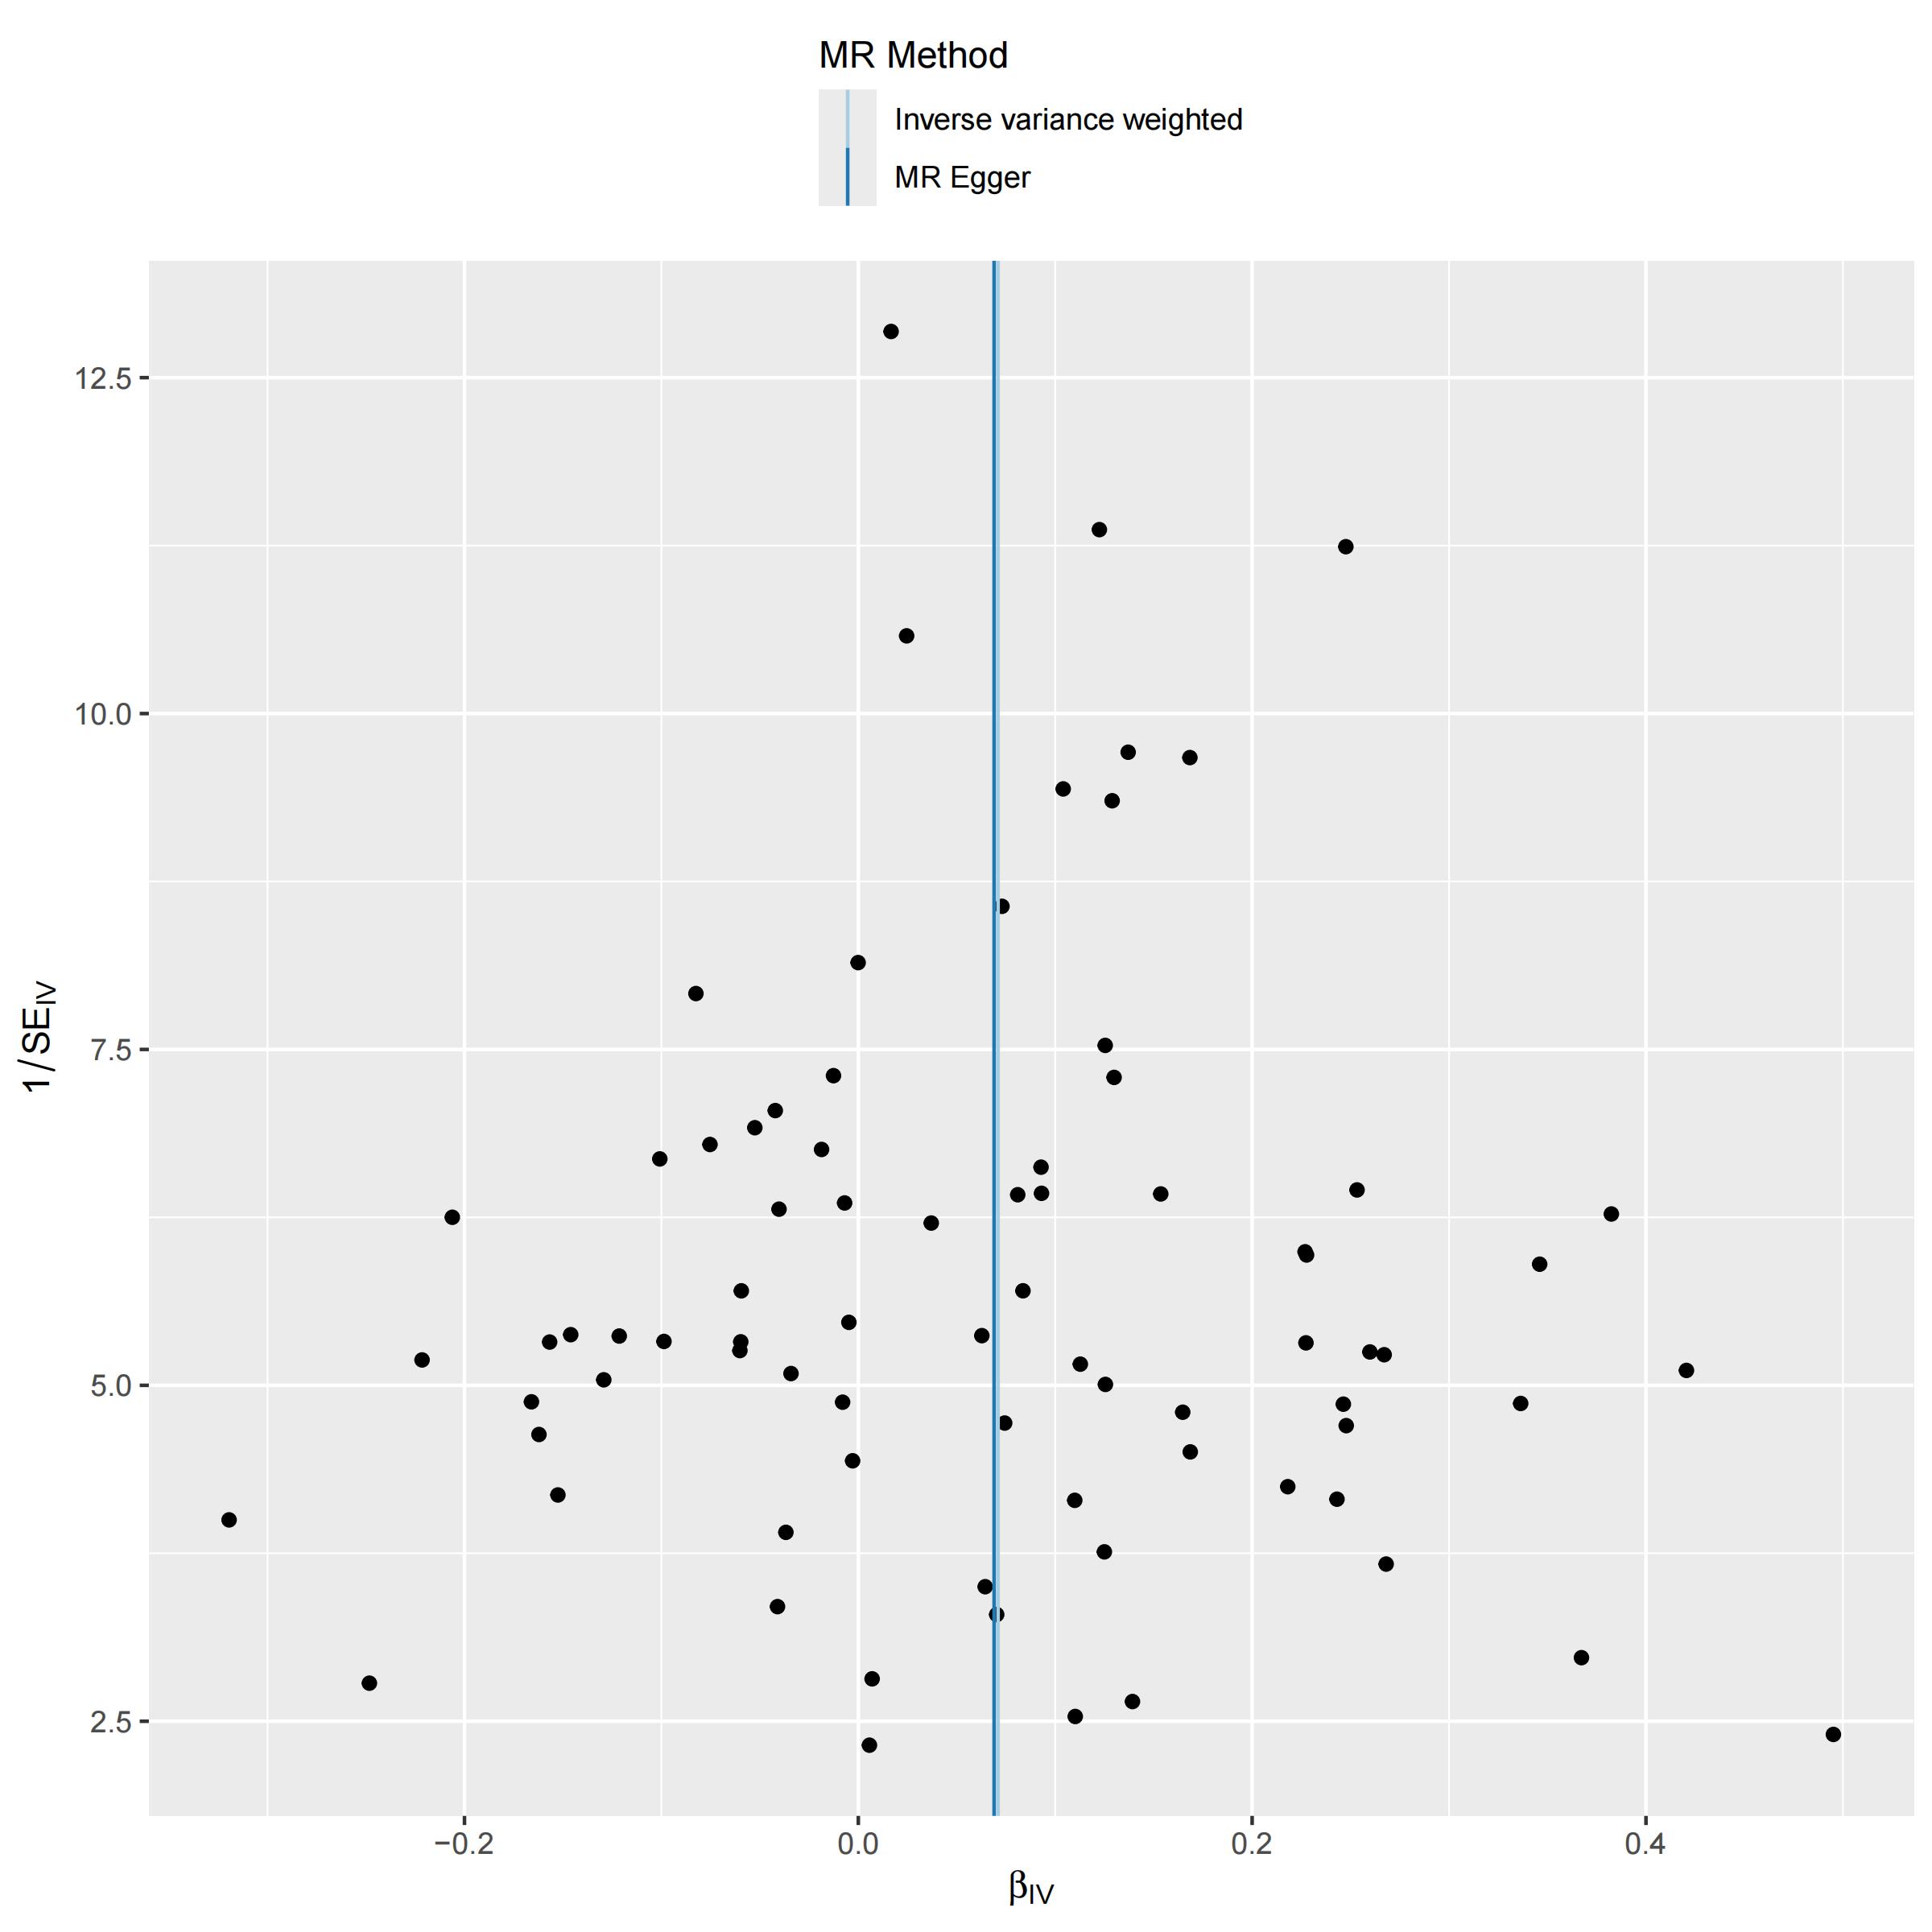


**I J**

**
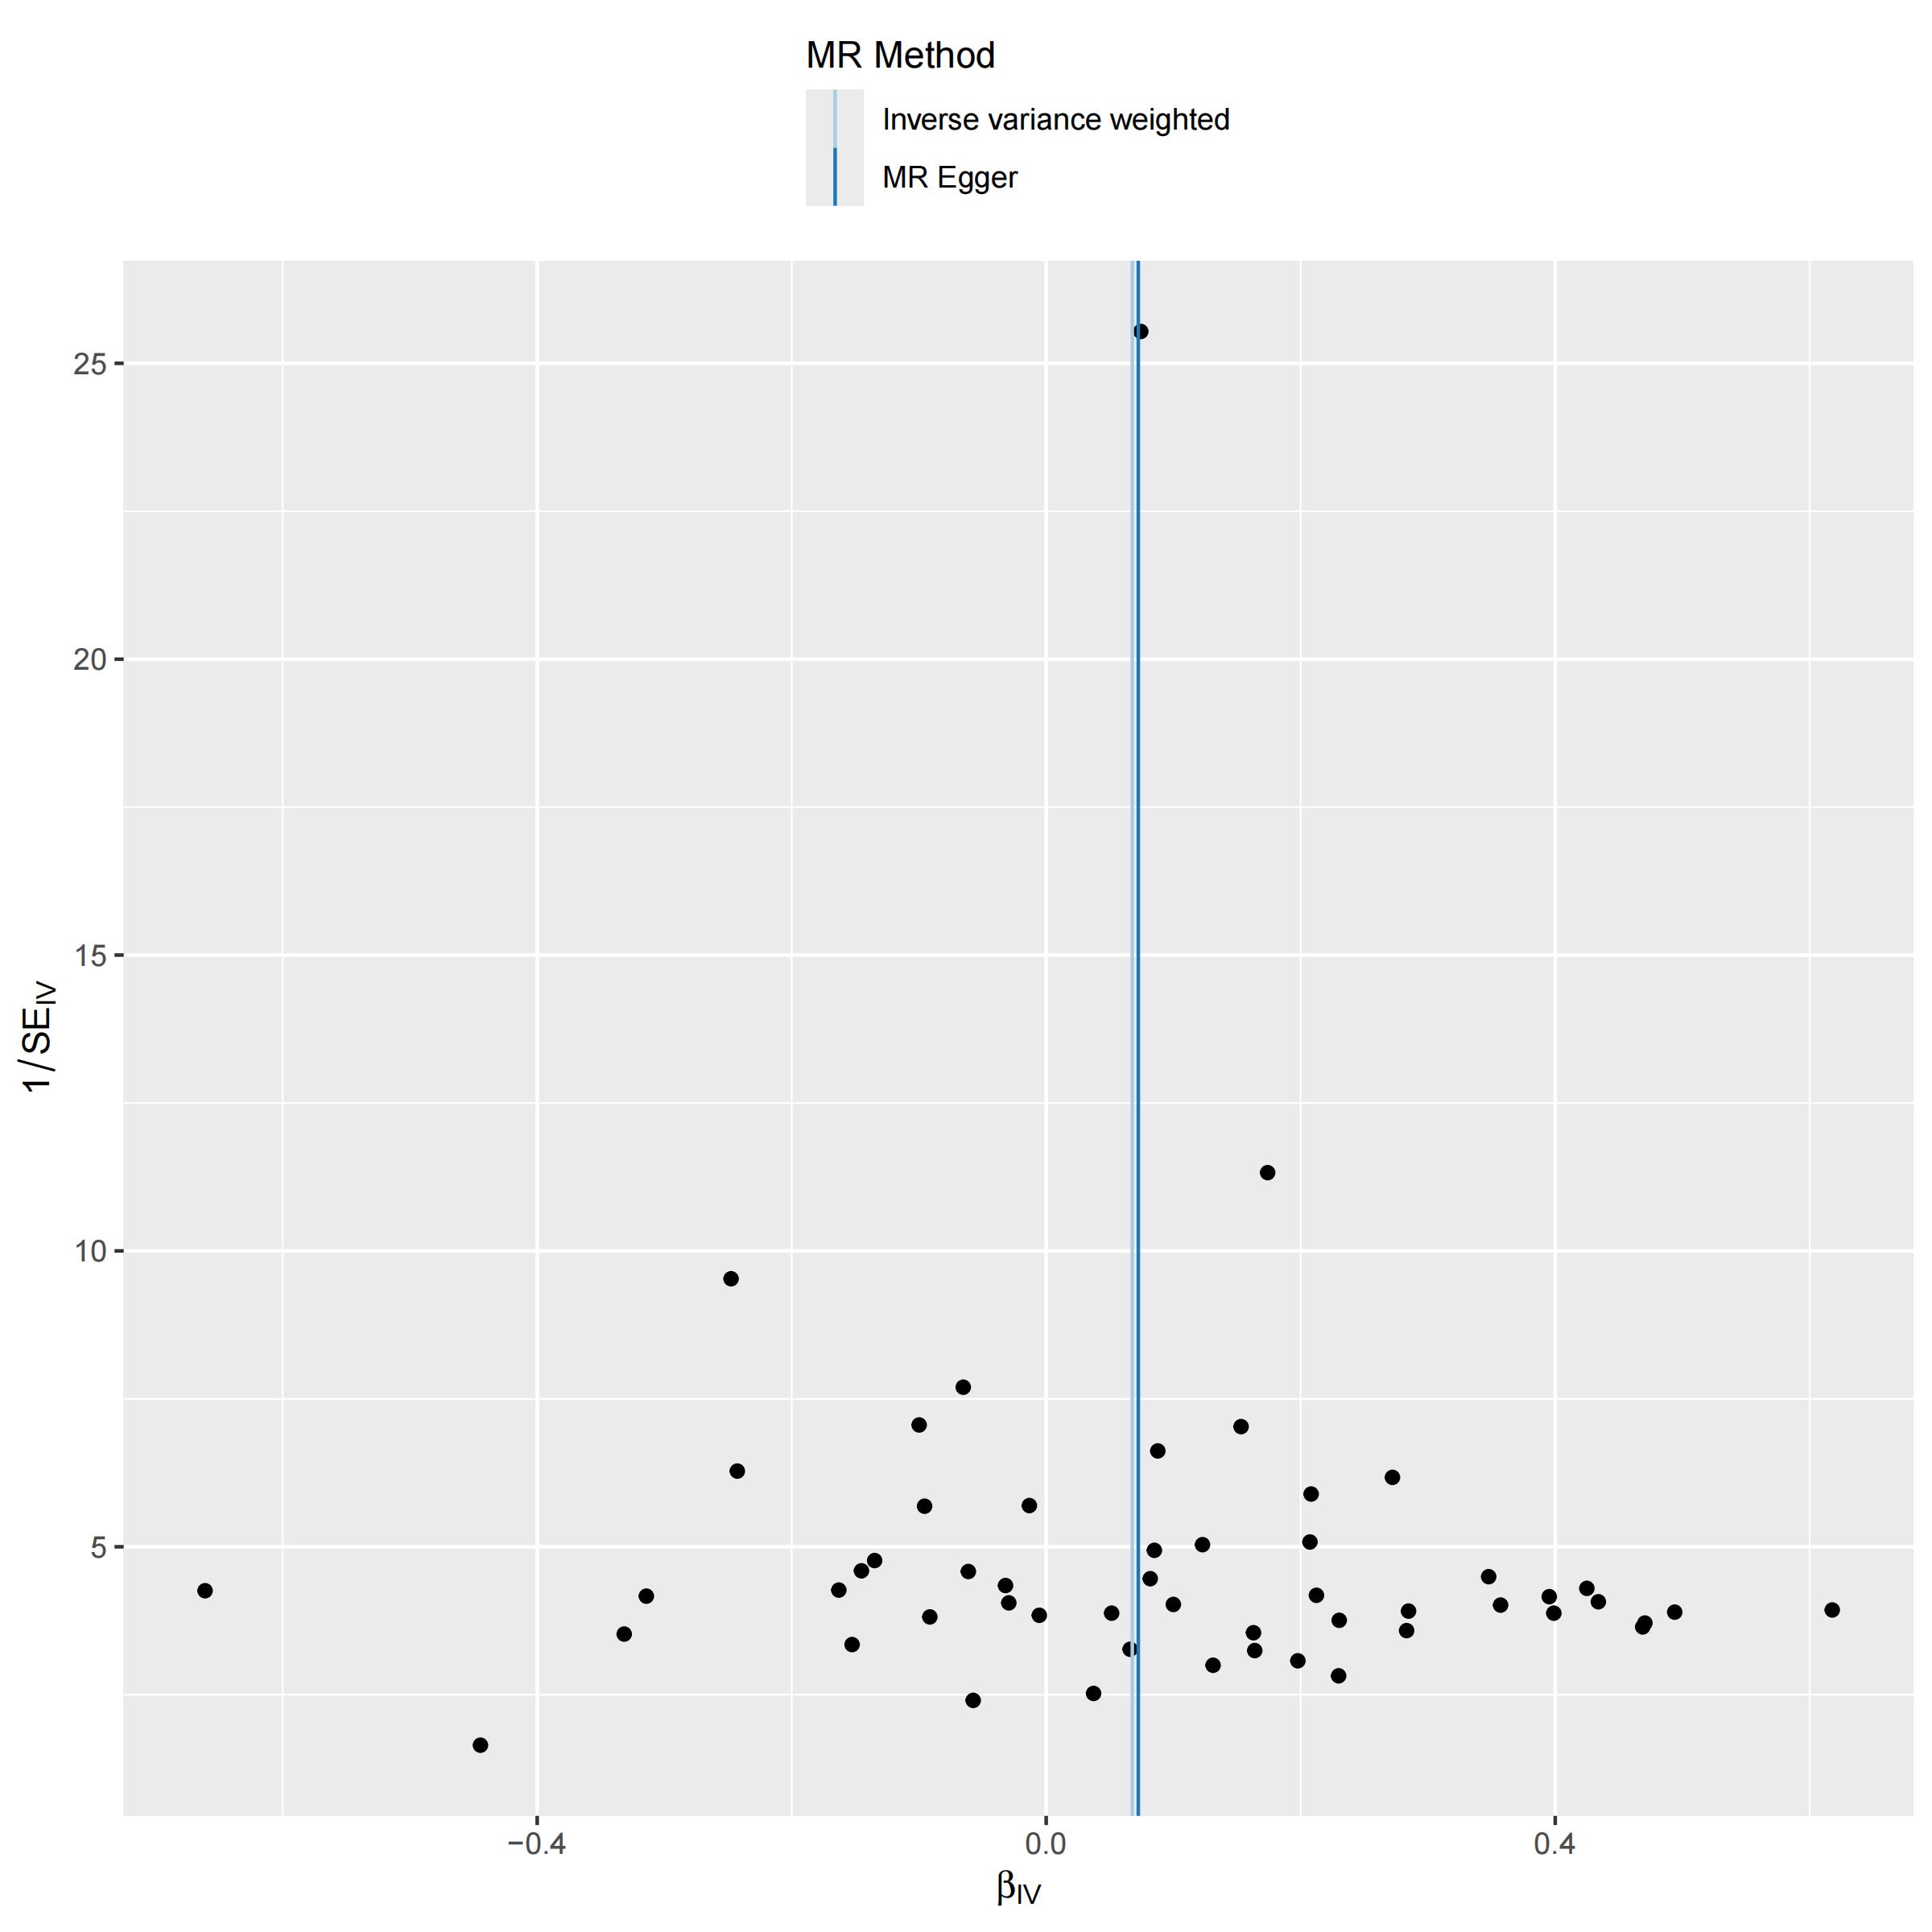

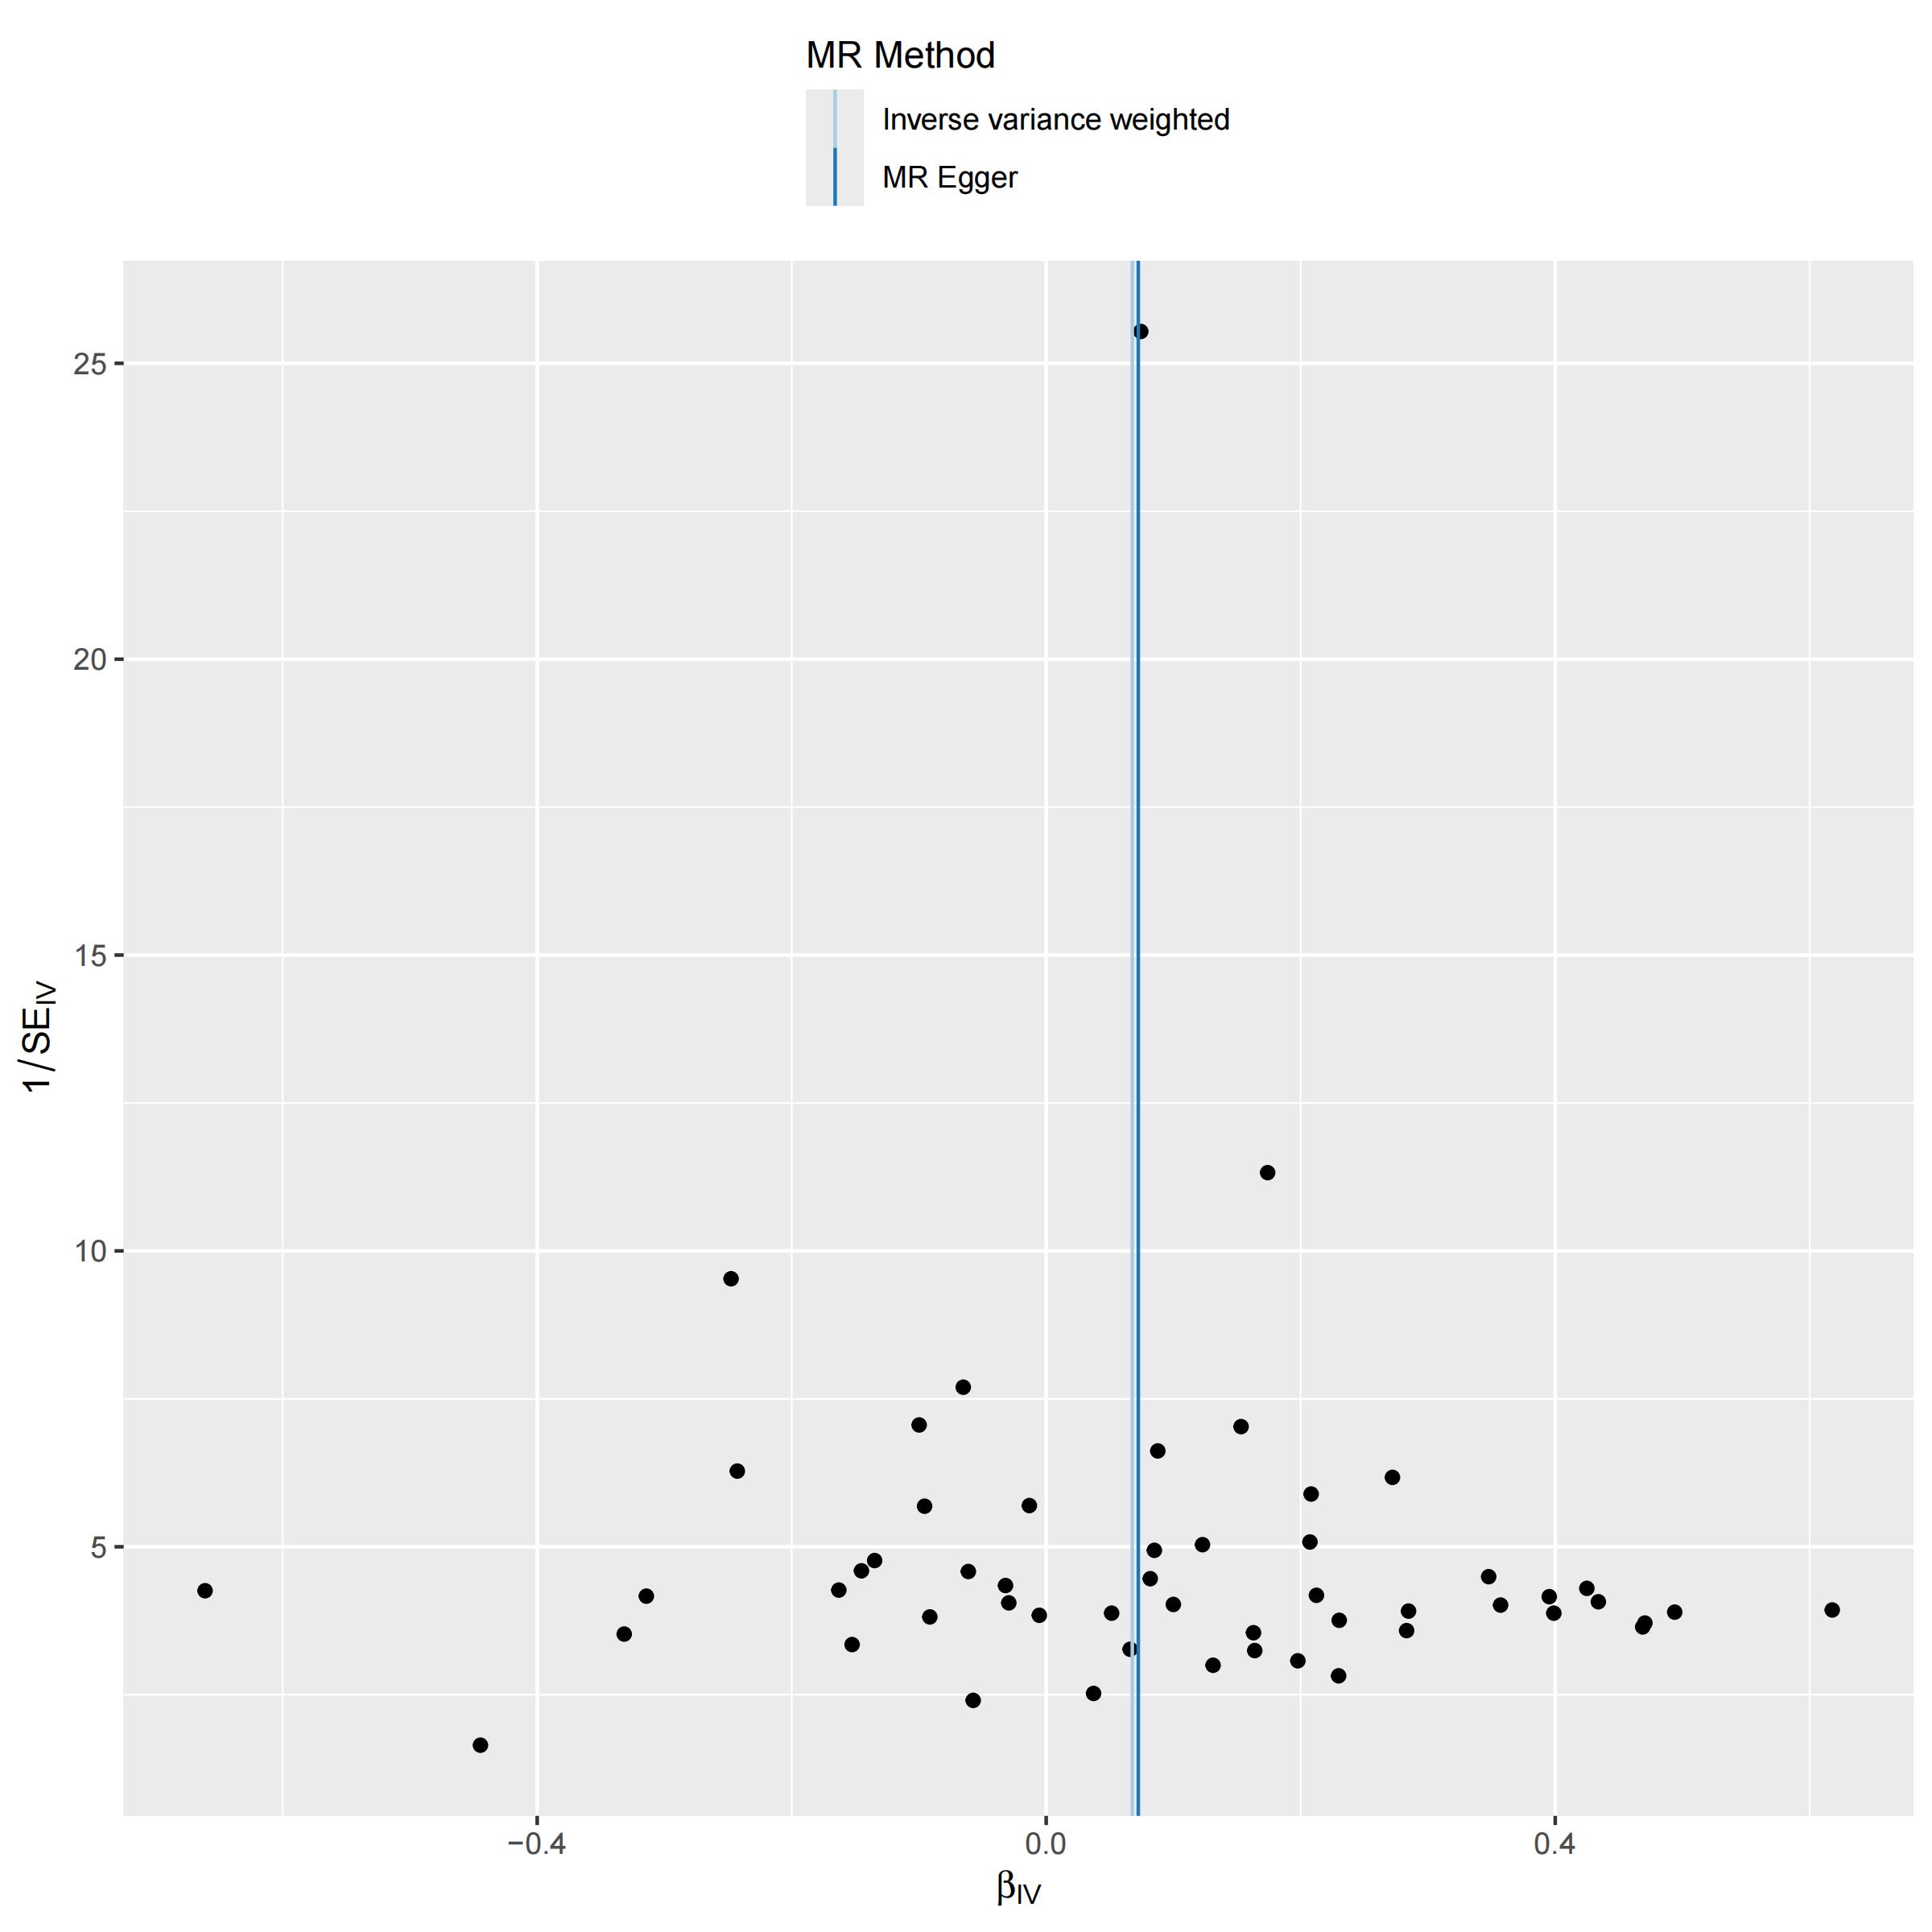
**

**Figure S5 Funnel plots of MR Analysis Assessing Causal Effects of CSF Metabolites on PPD Risk**Panels A-I correspond to the following metabolites: guanosine, argininosuccinate, maleate, N6-methyllysine, homocarnosine, N-acetyl-isoputreanine, glucose, benzoate, gluconate, and arachidonate (20:4n6).

**A**


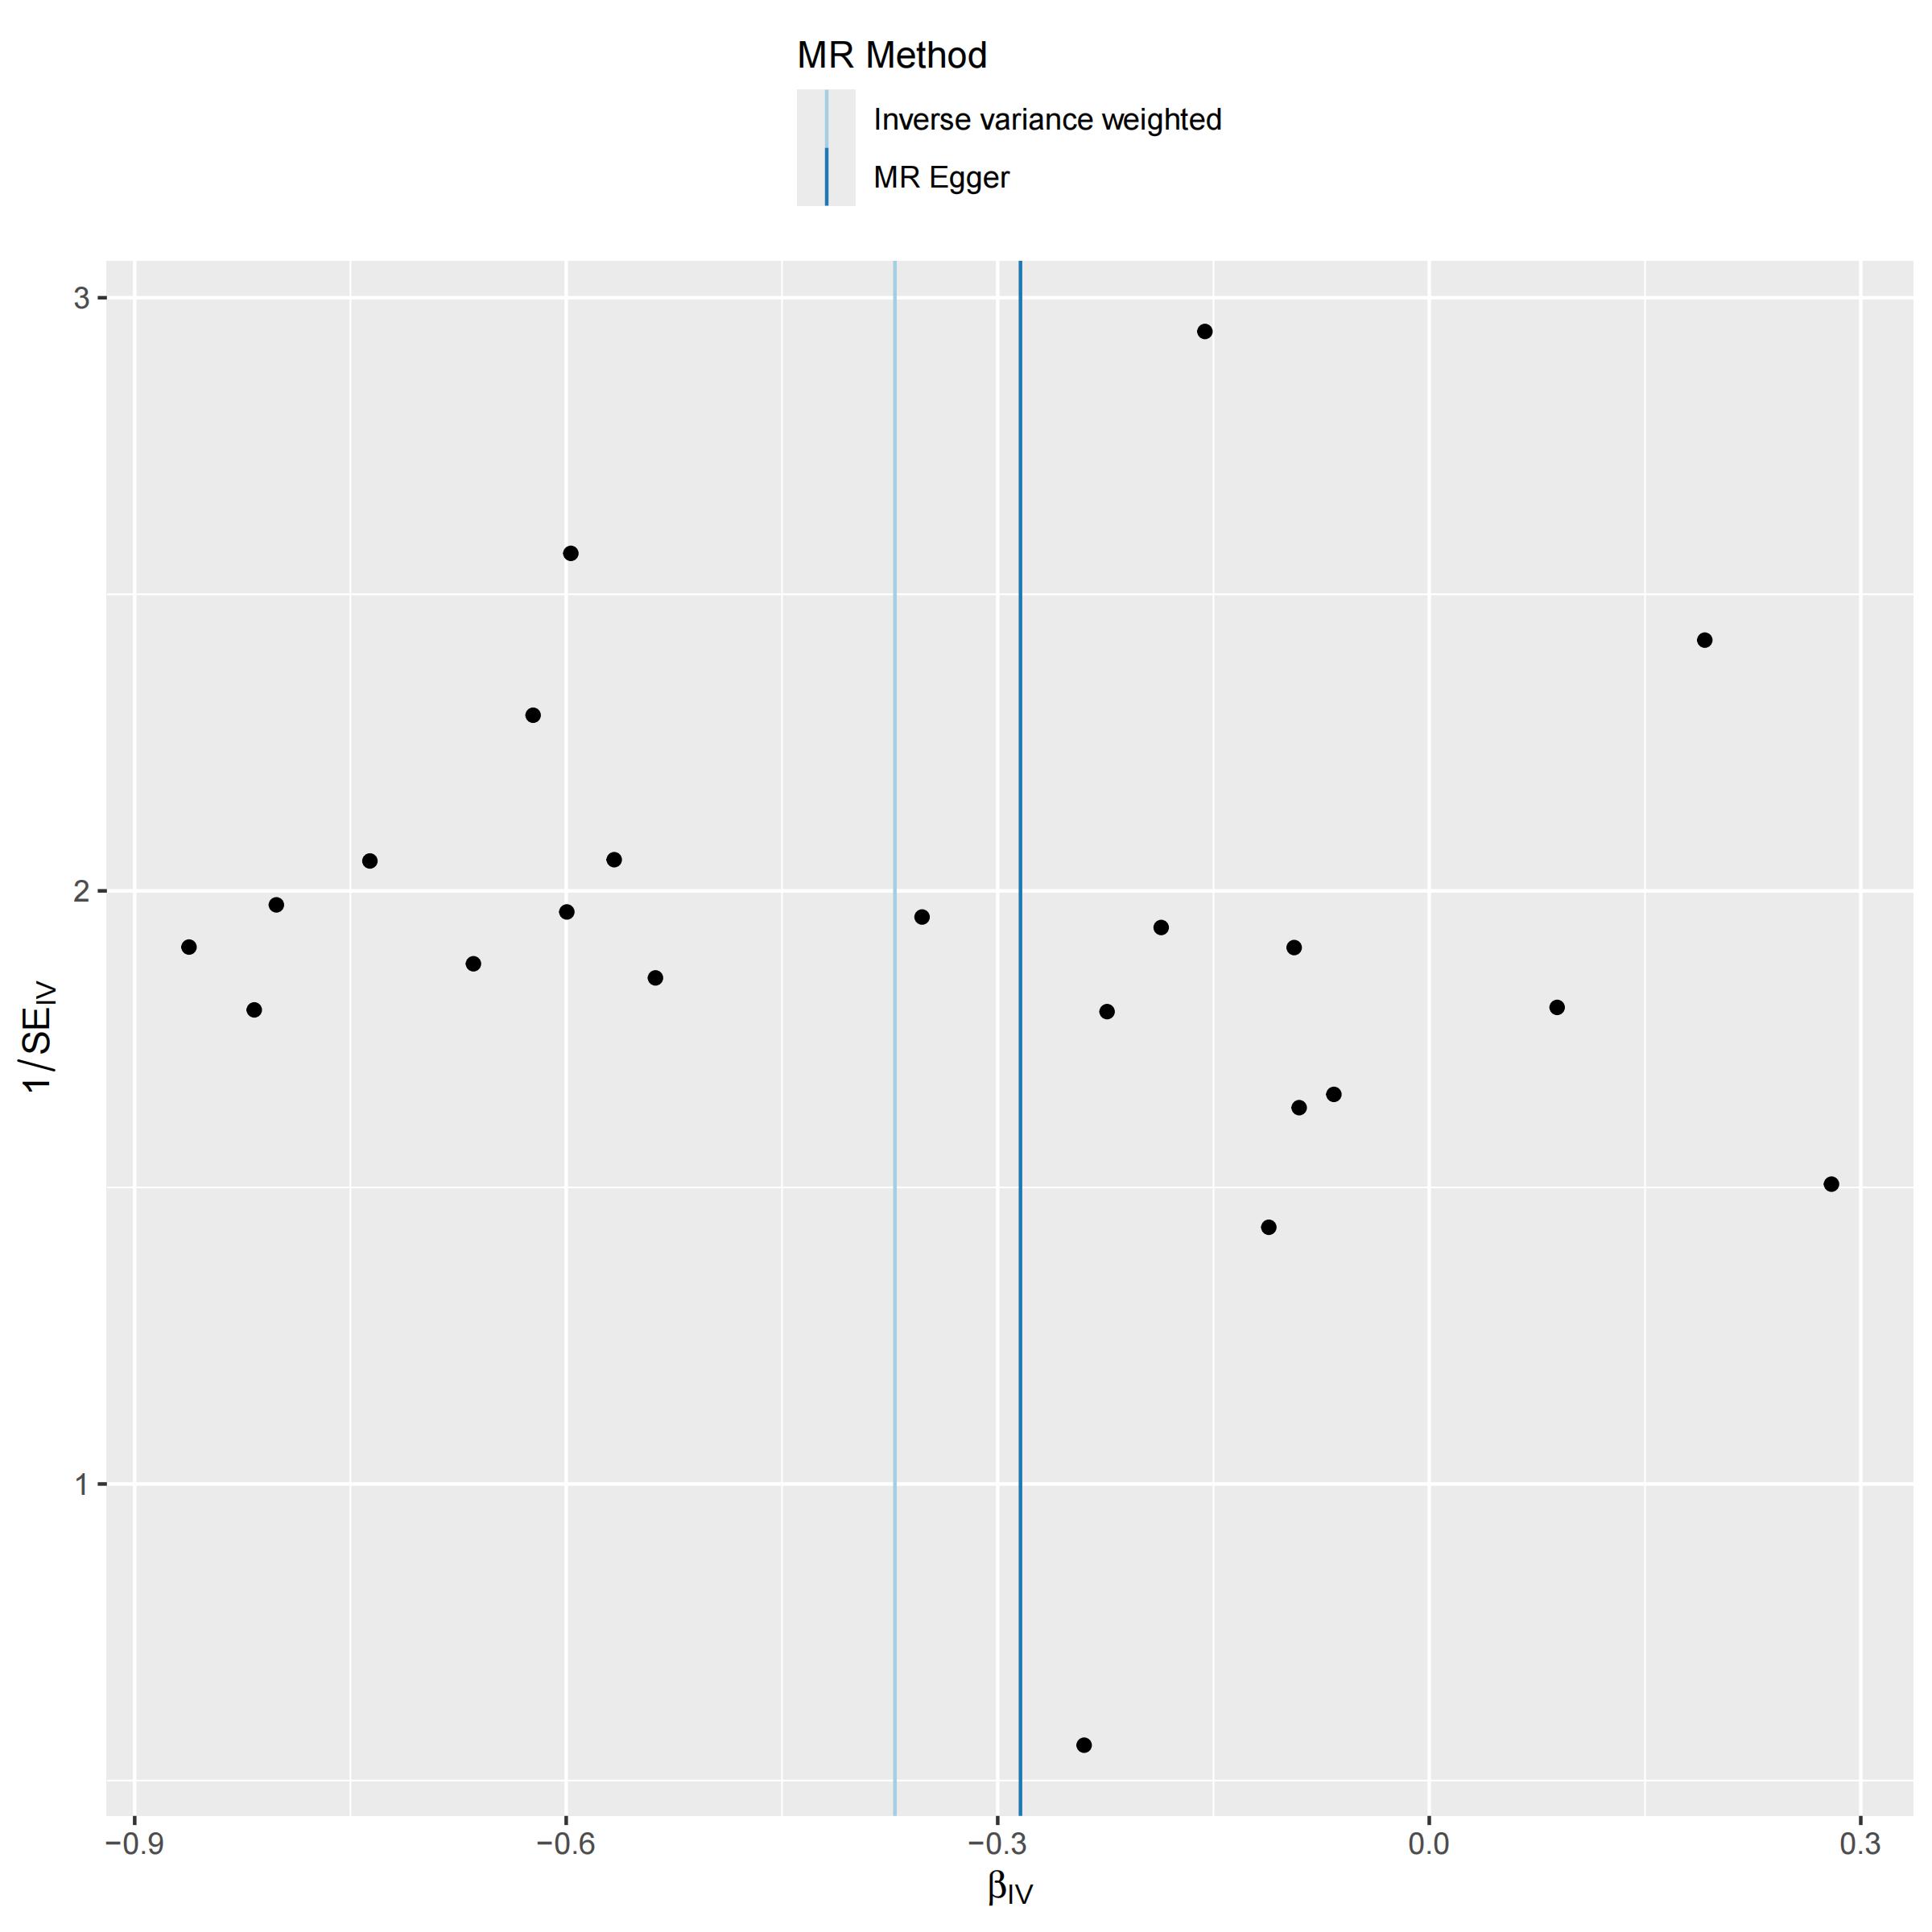


**Figure S6 Funnel Plots of Reverse-direction MR Analysis Evaluating Causal Effects of PPD on CSF Metabolite Levels**Panel A corresponds to maleate.

**A**  **B**


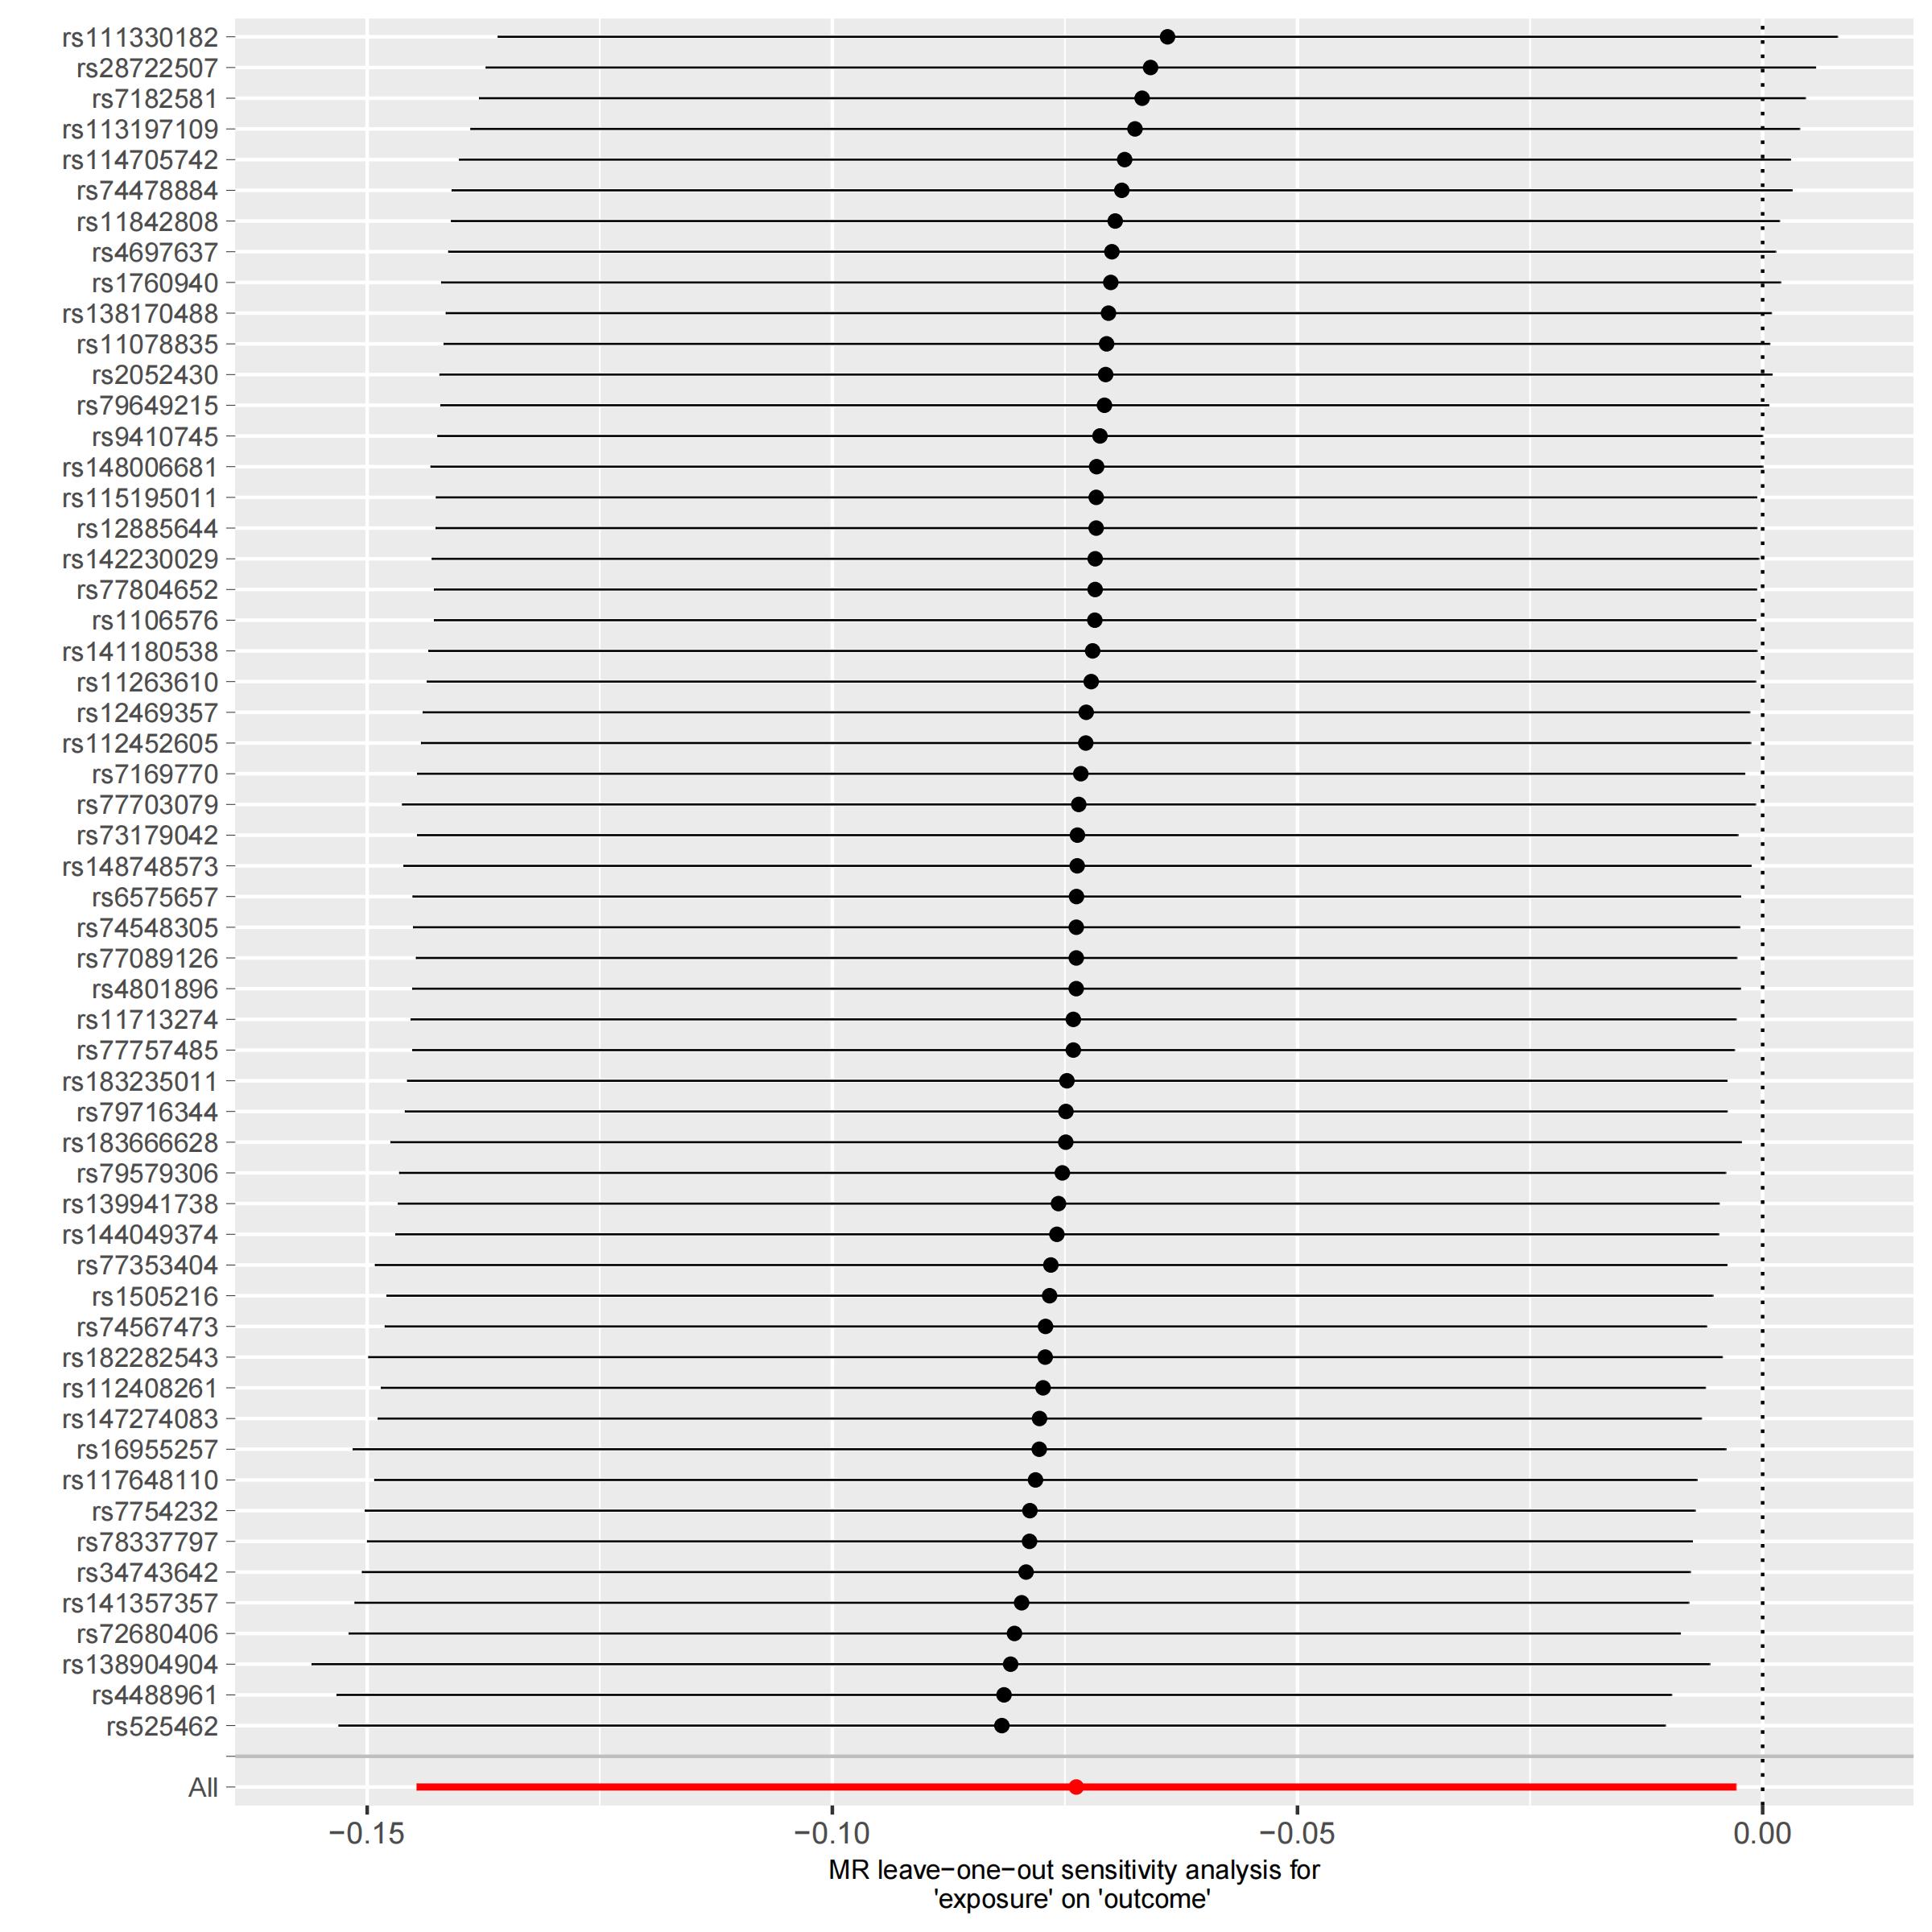

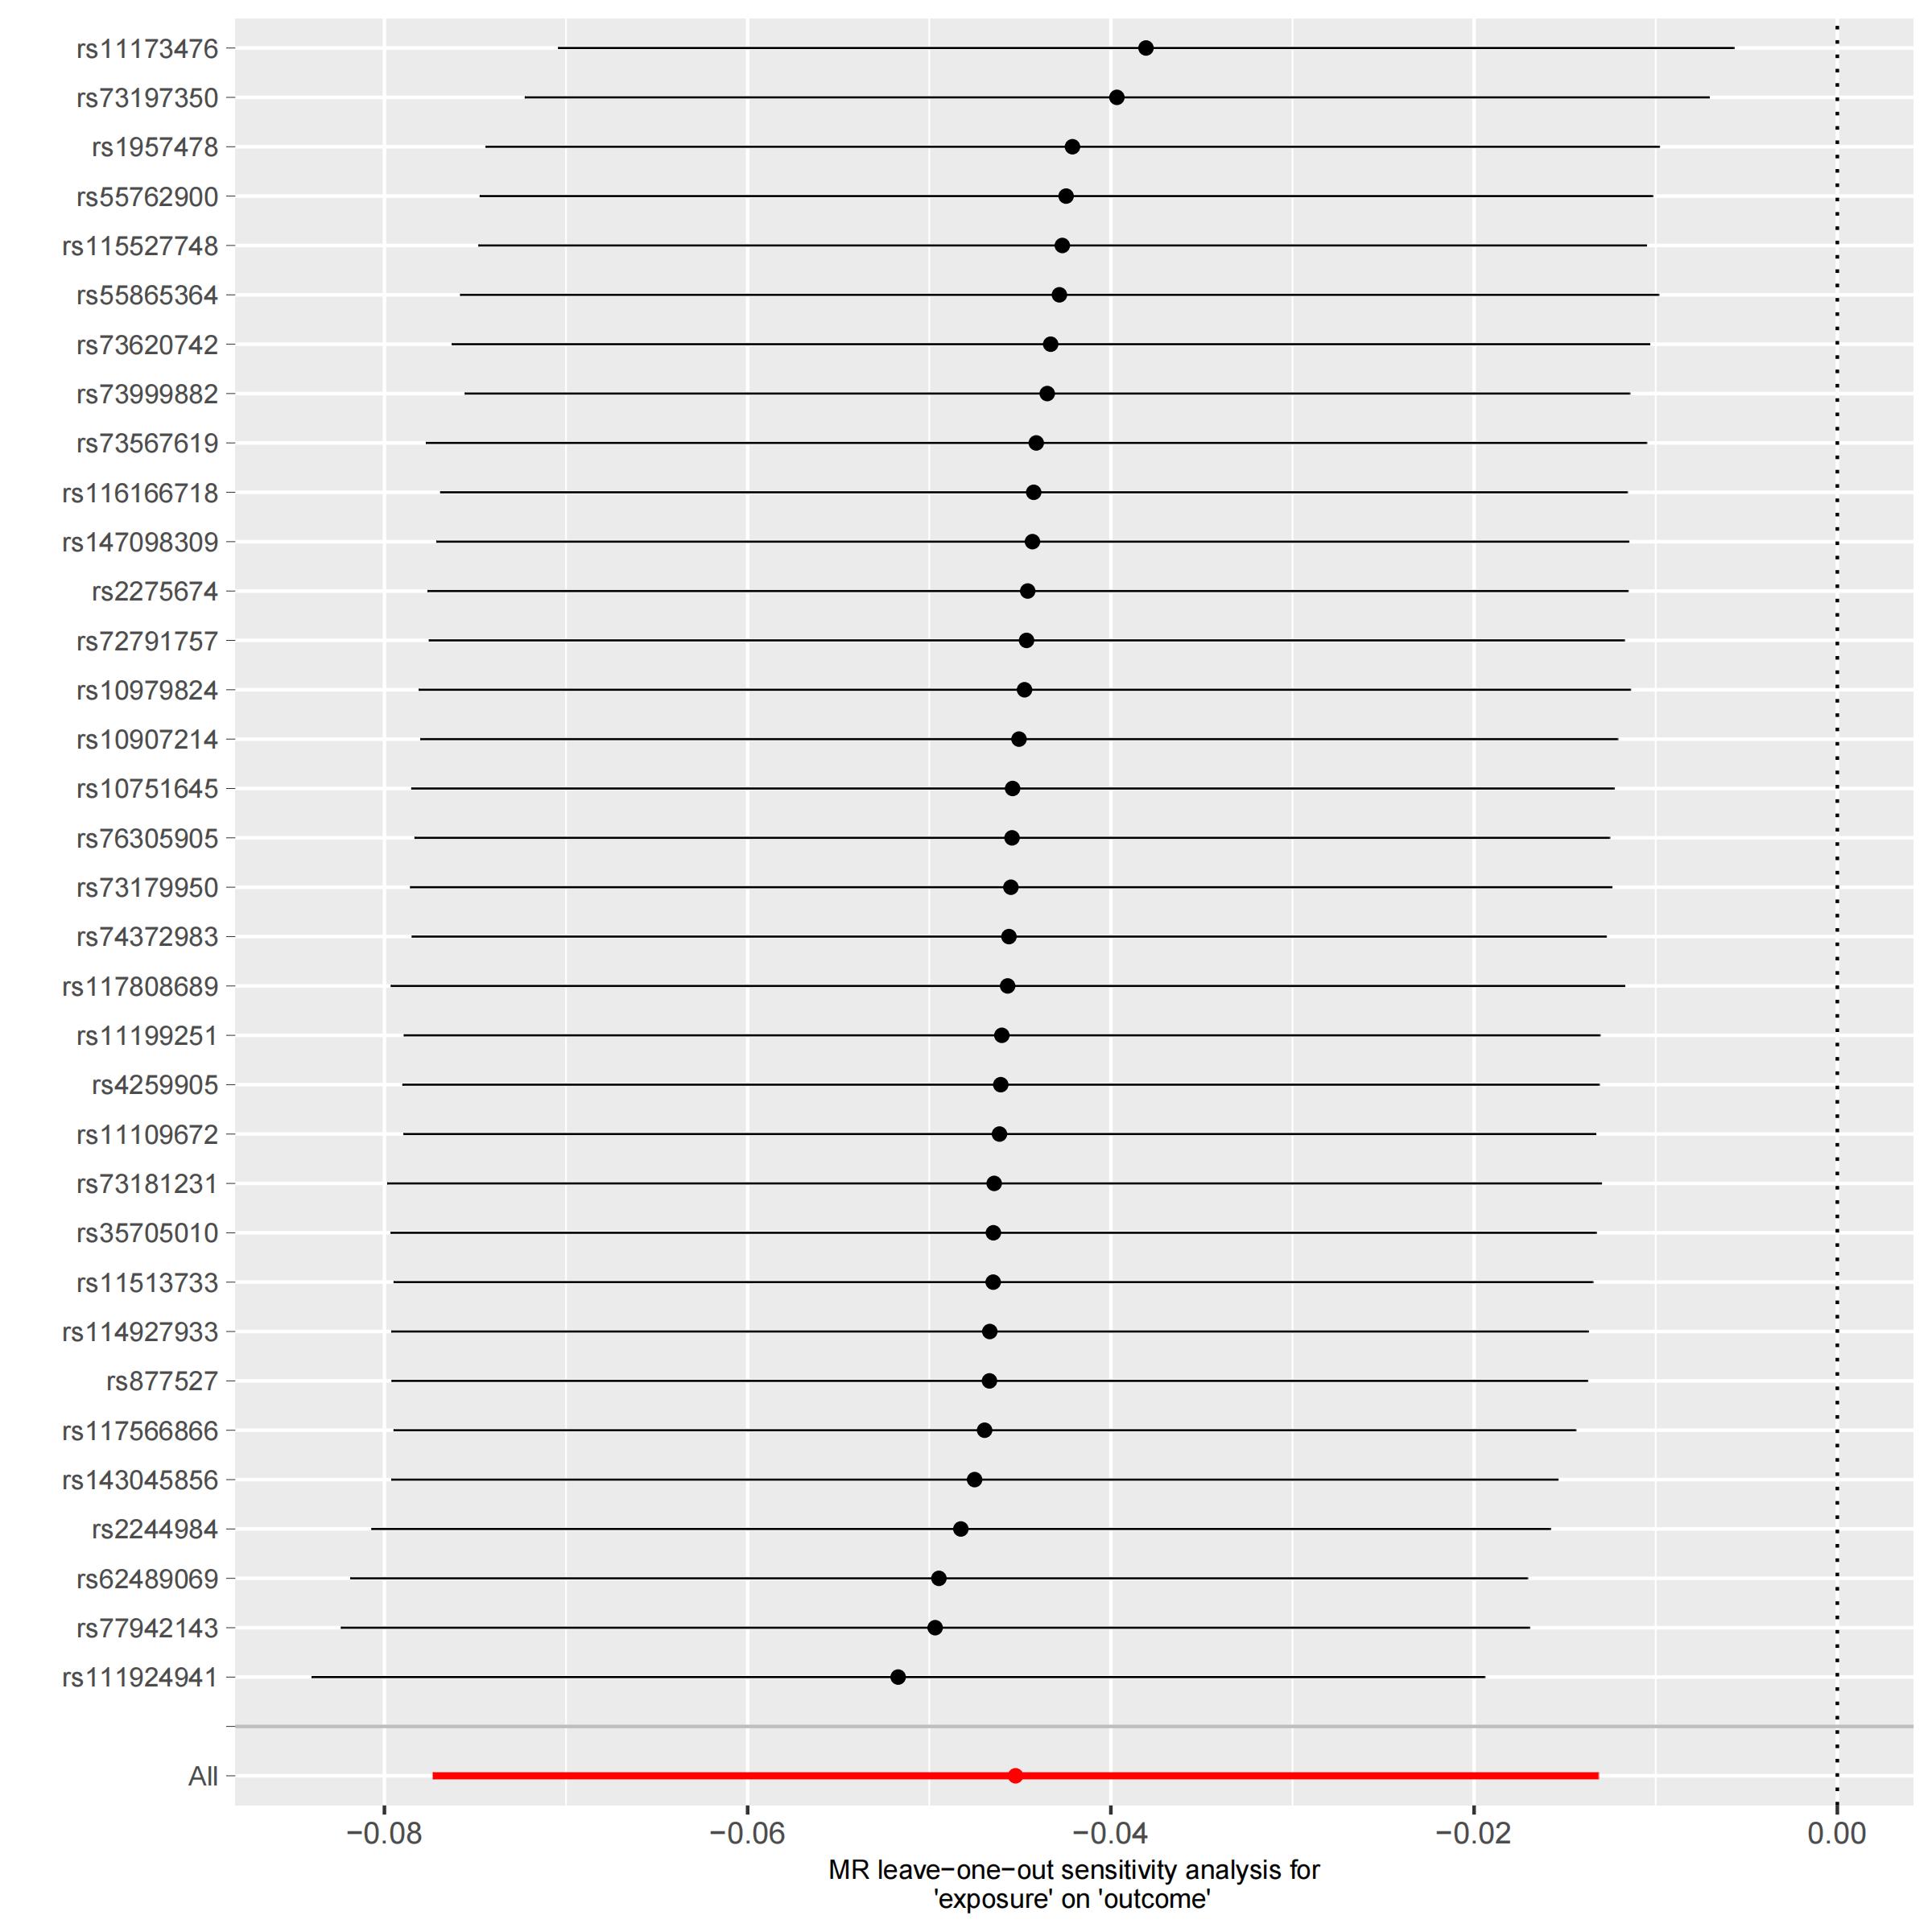


**C**  **D**


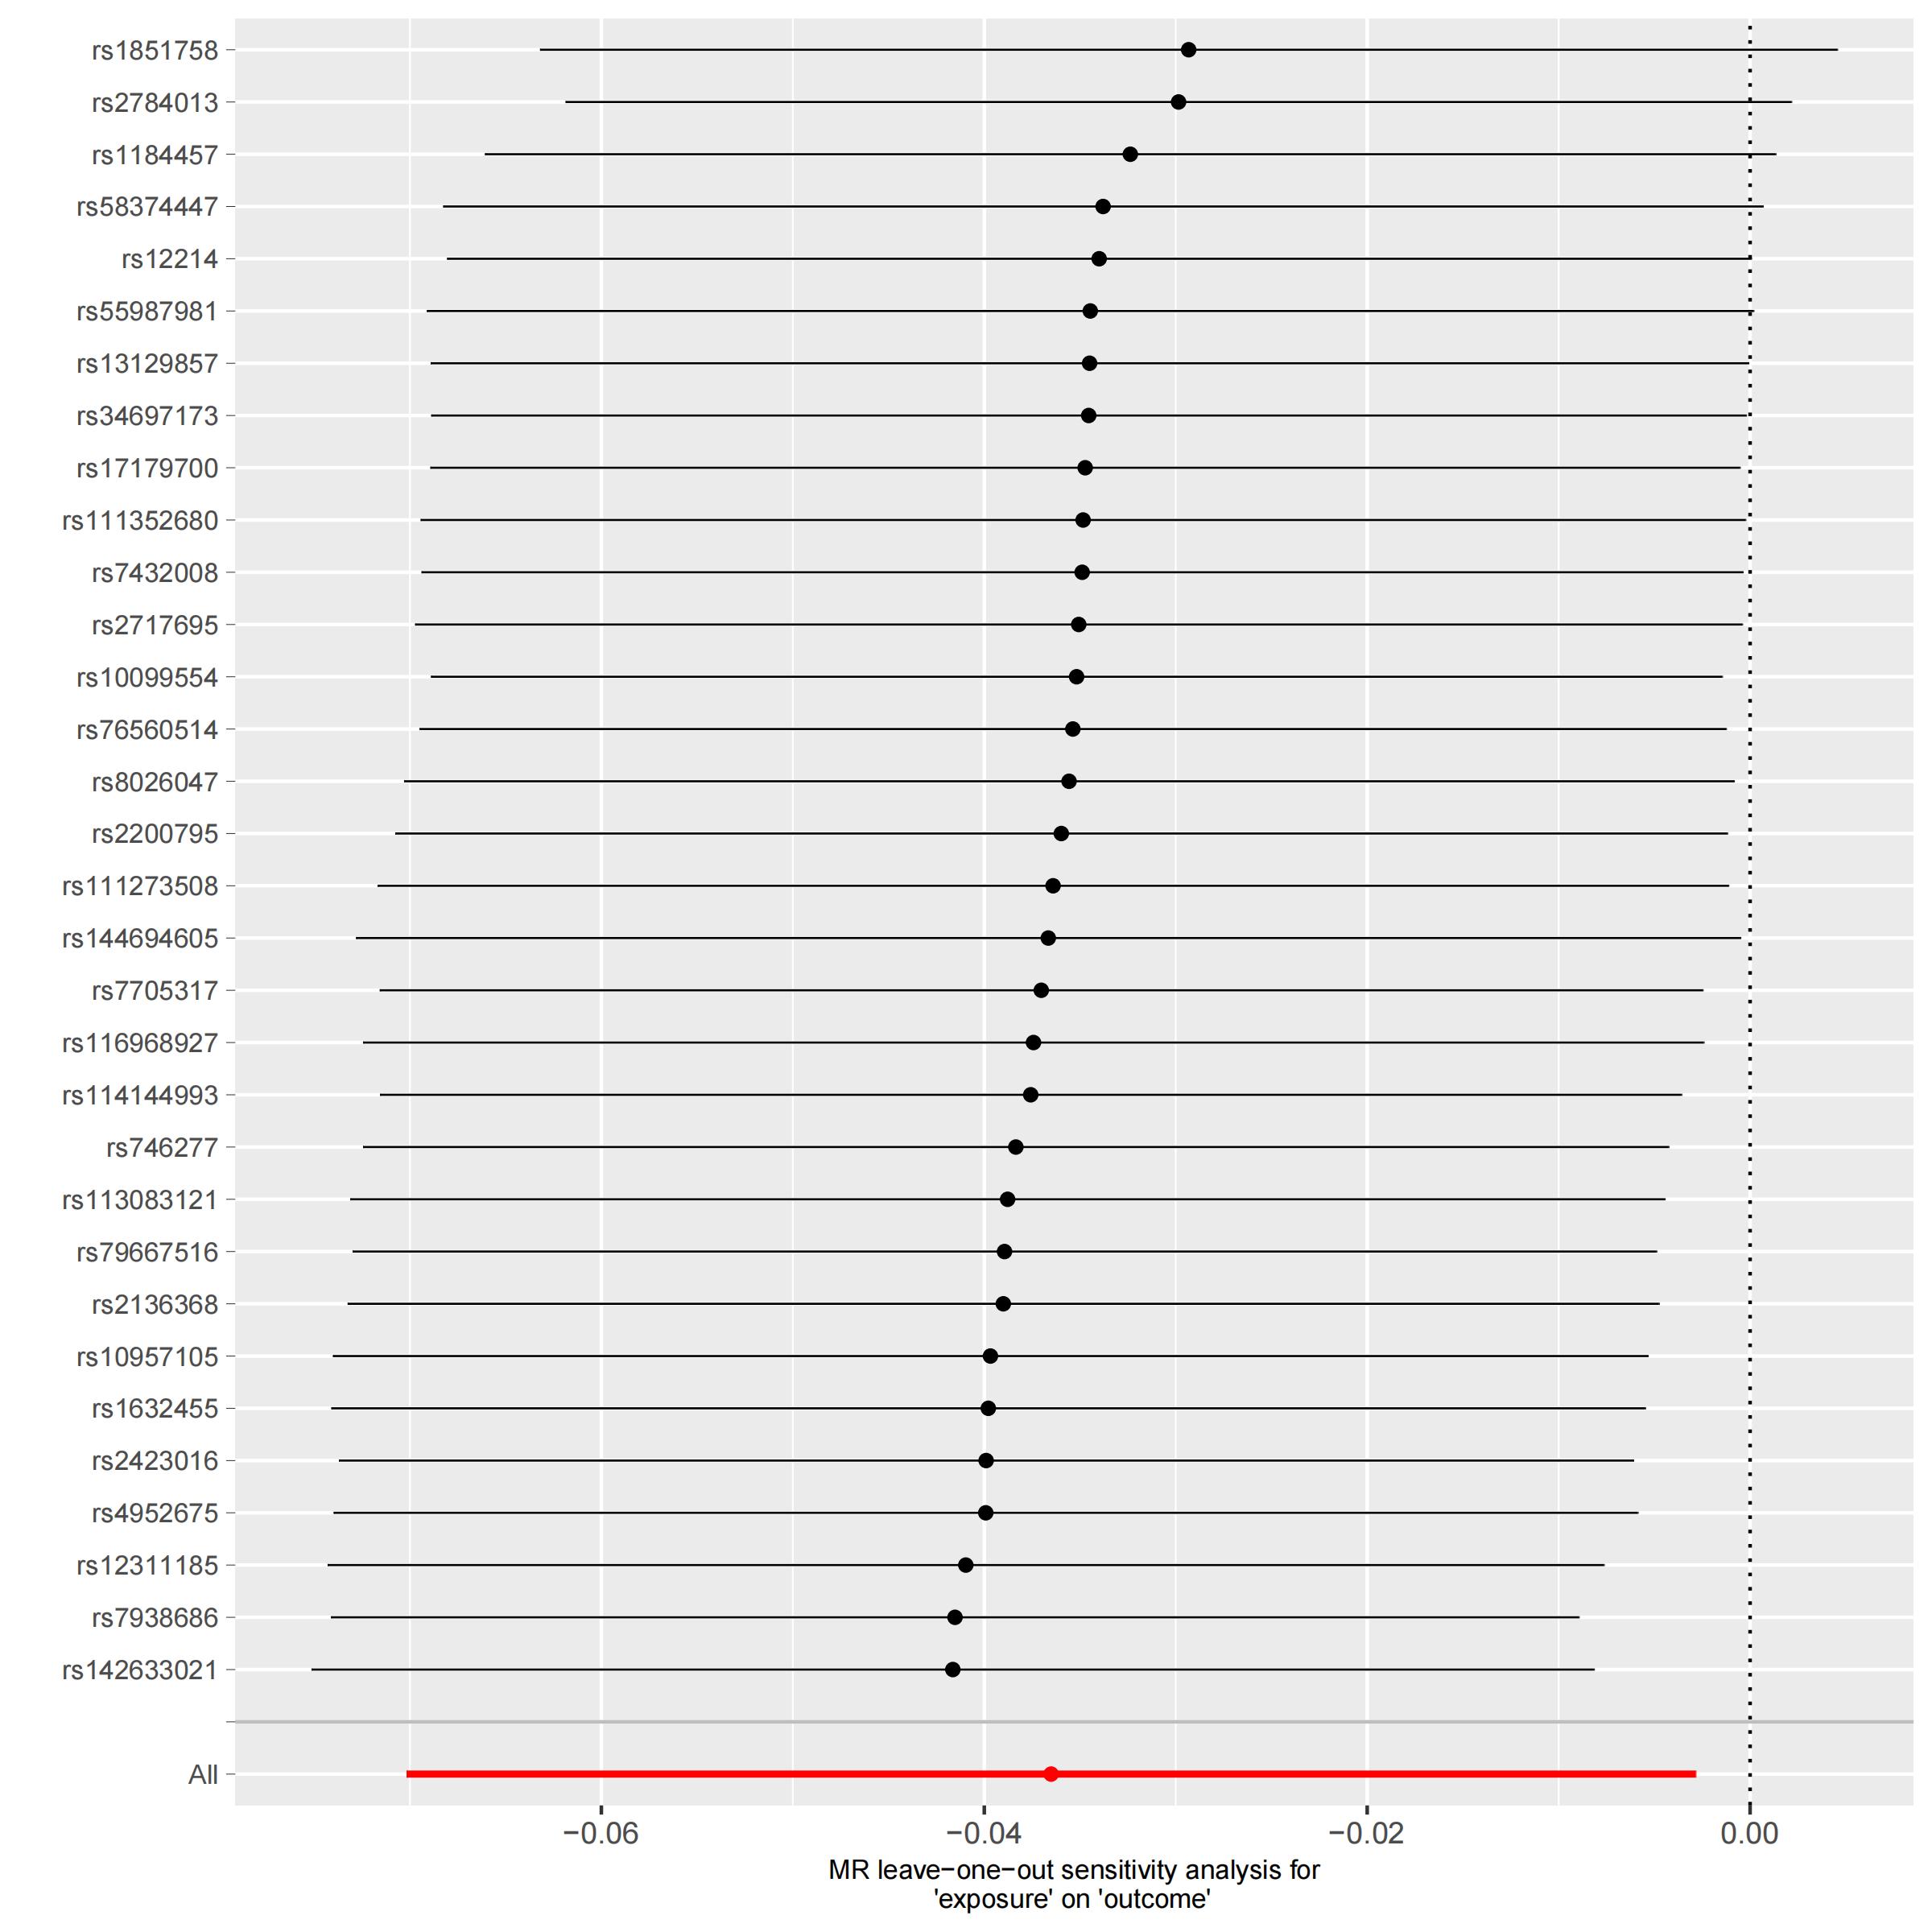

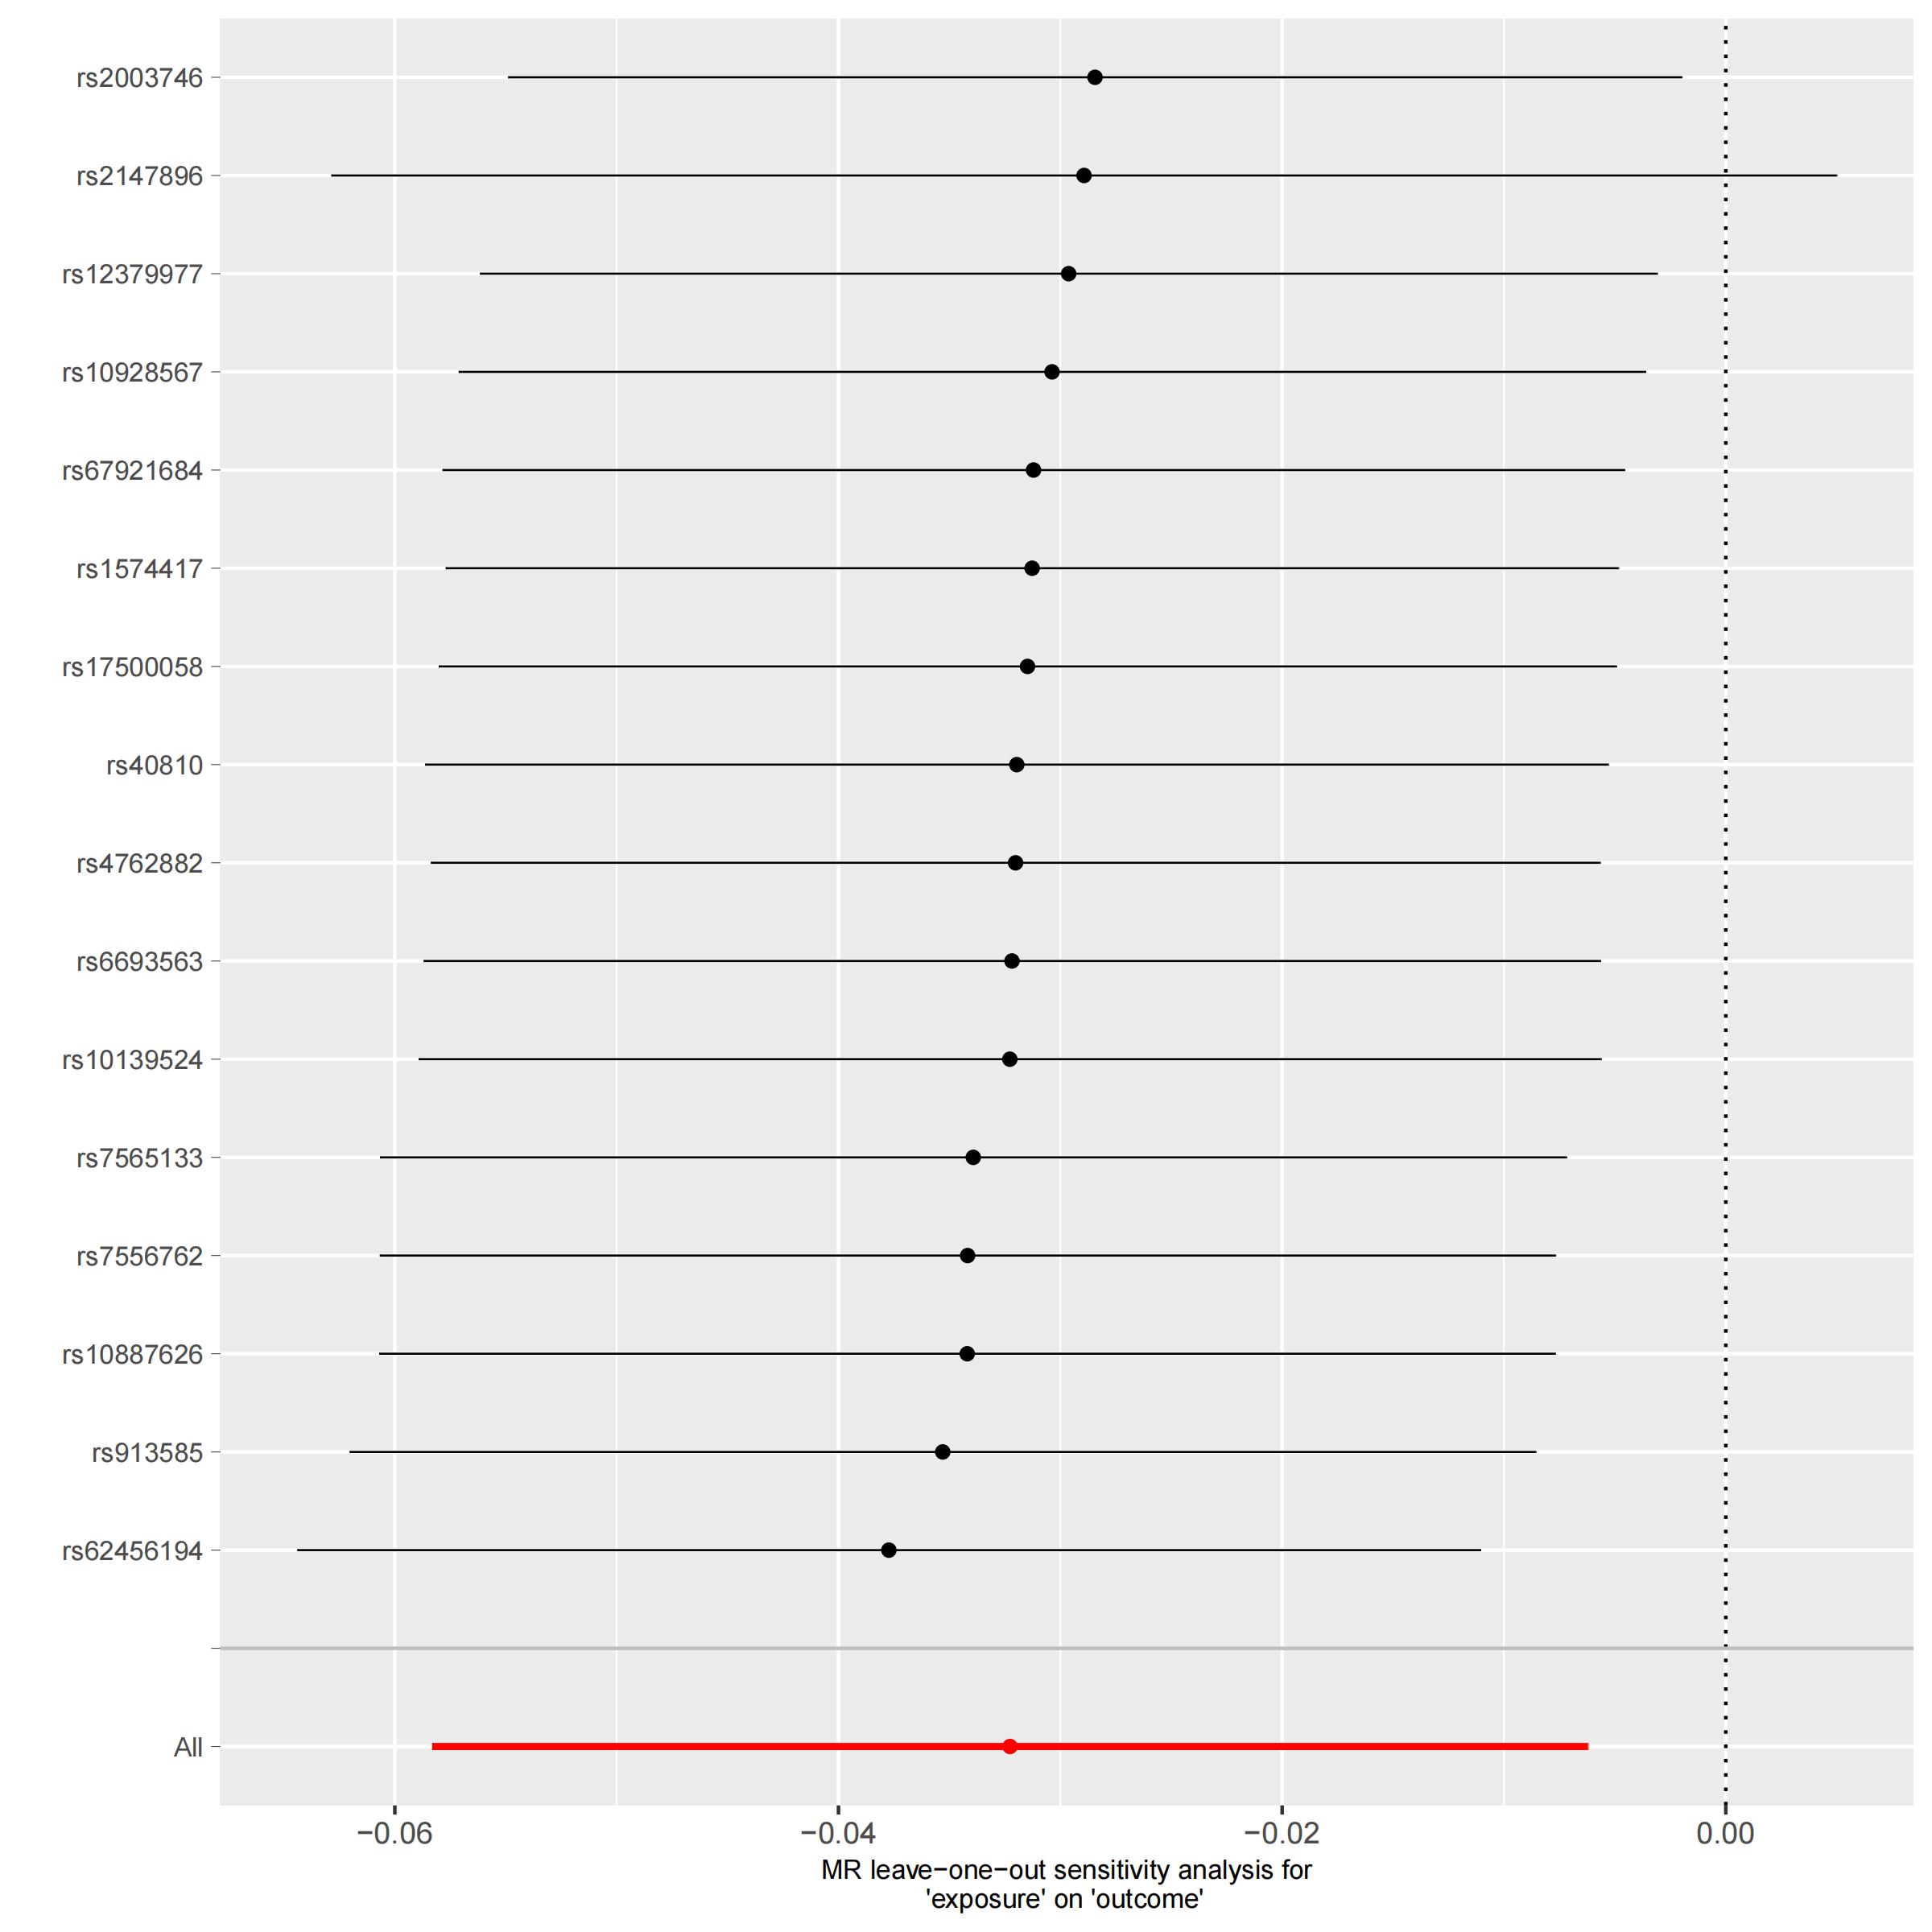


**E**   **F**


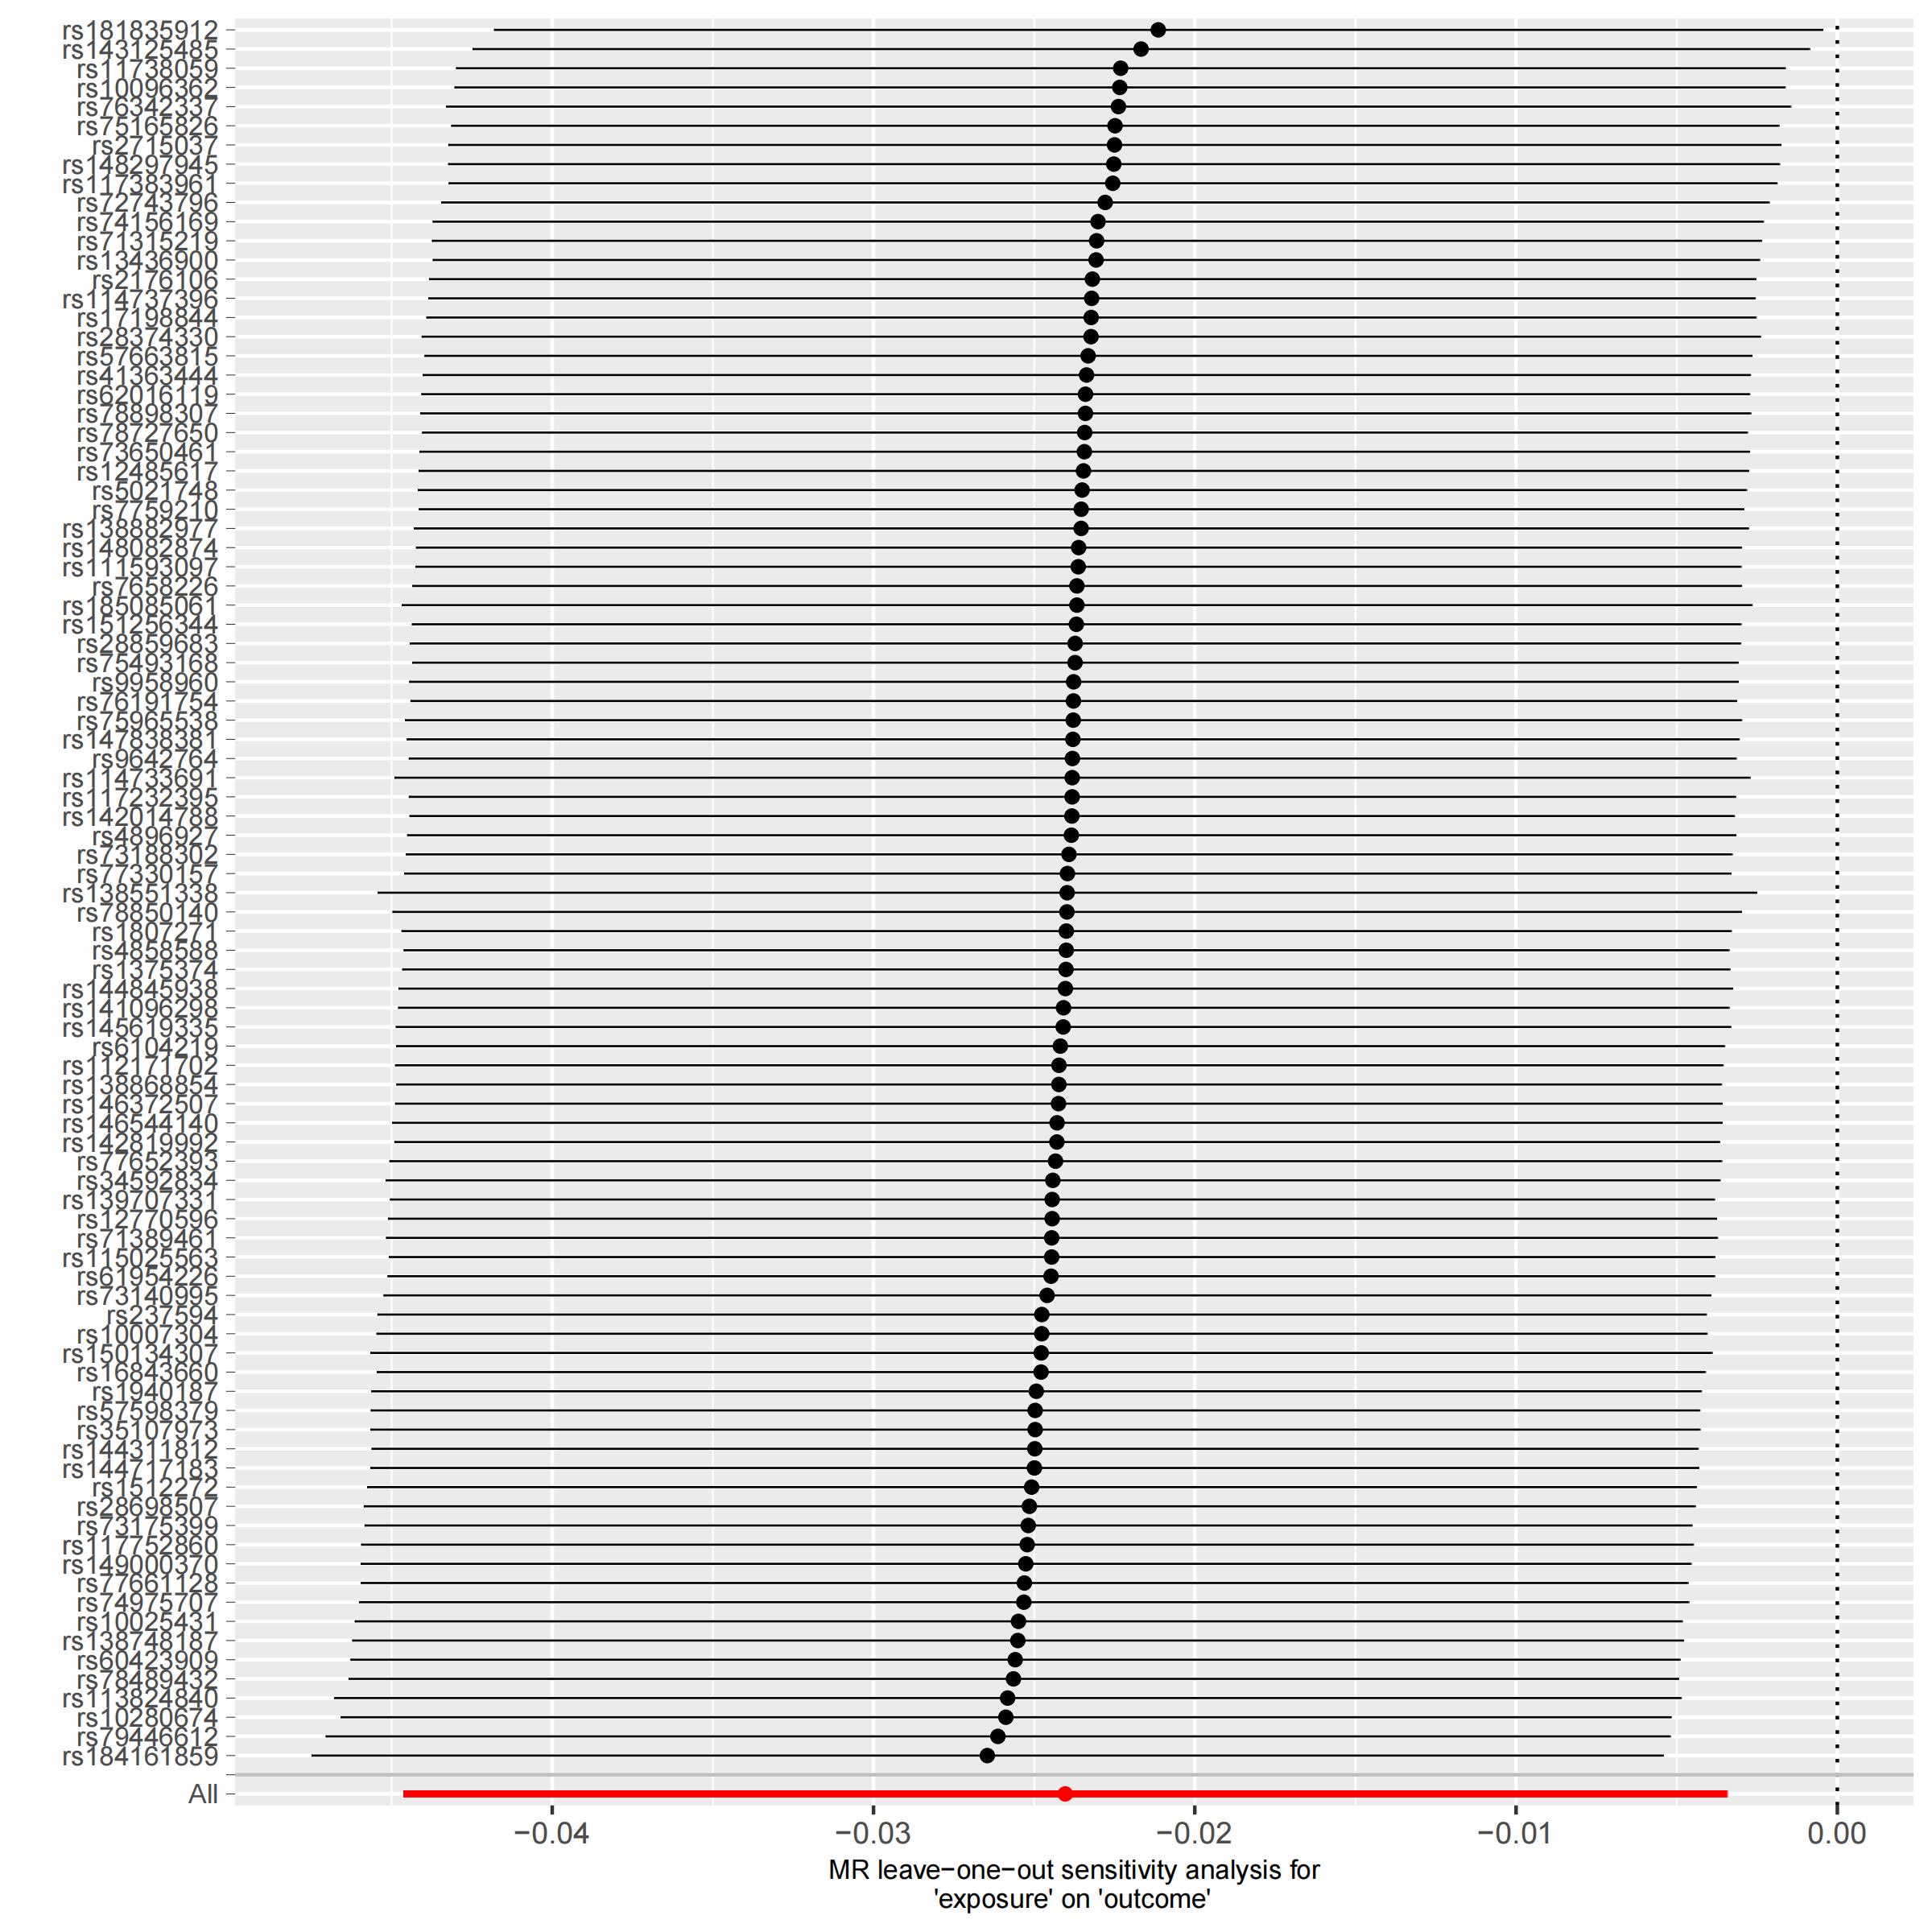

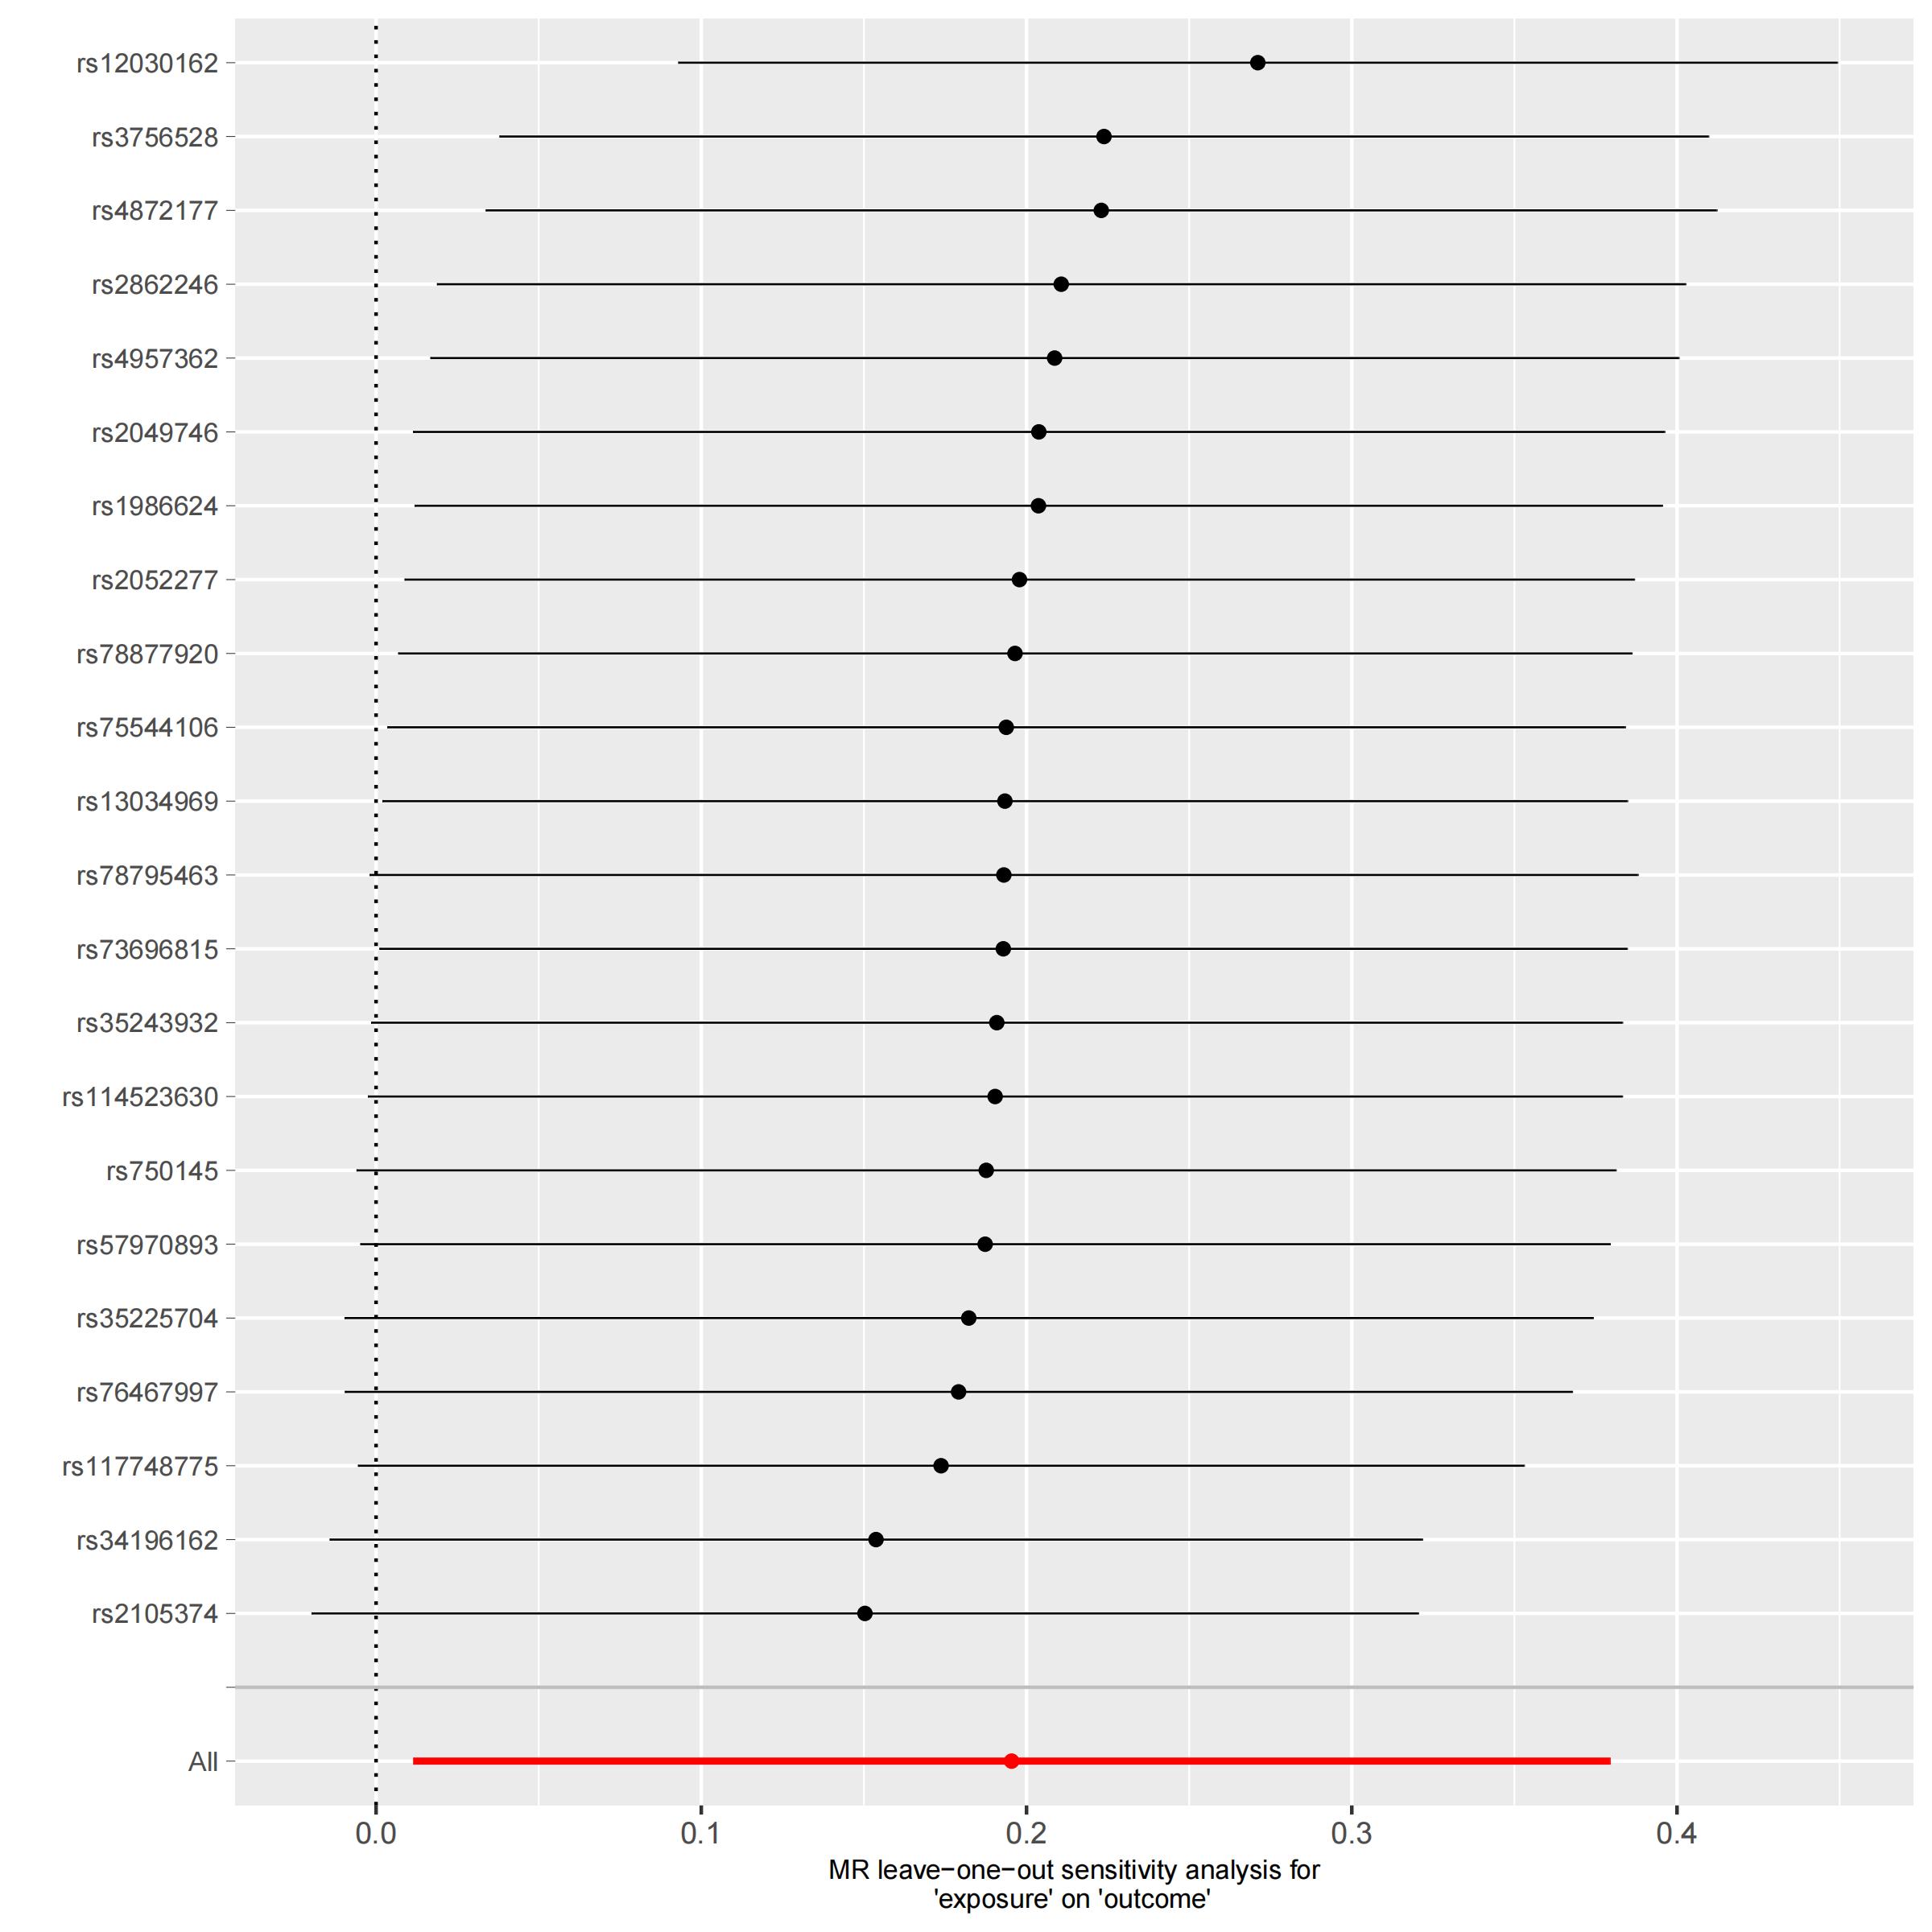


**G**   **H**


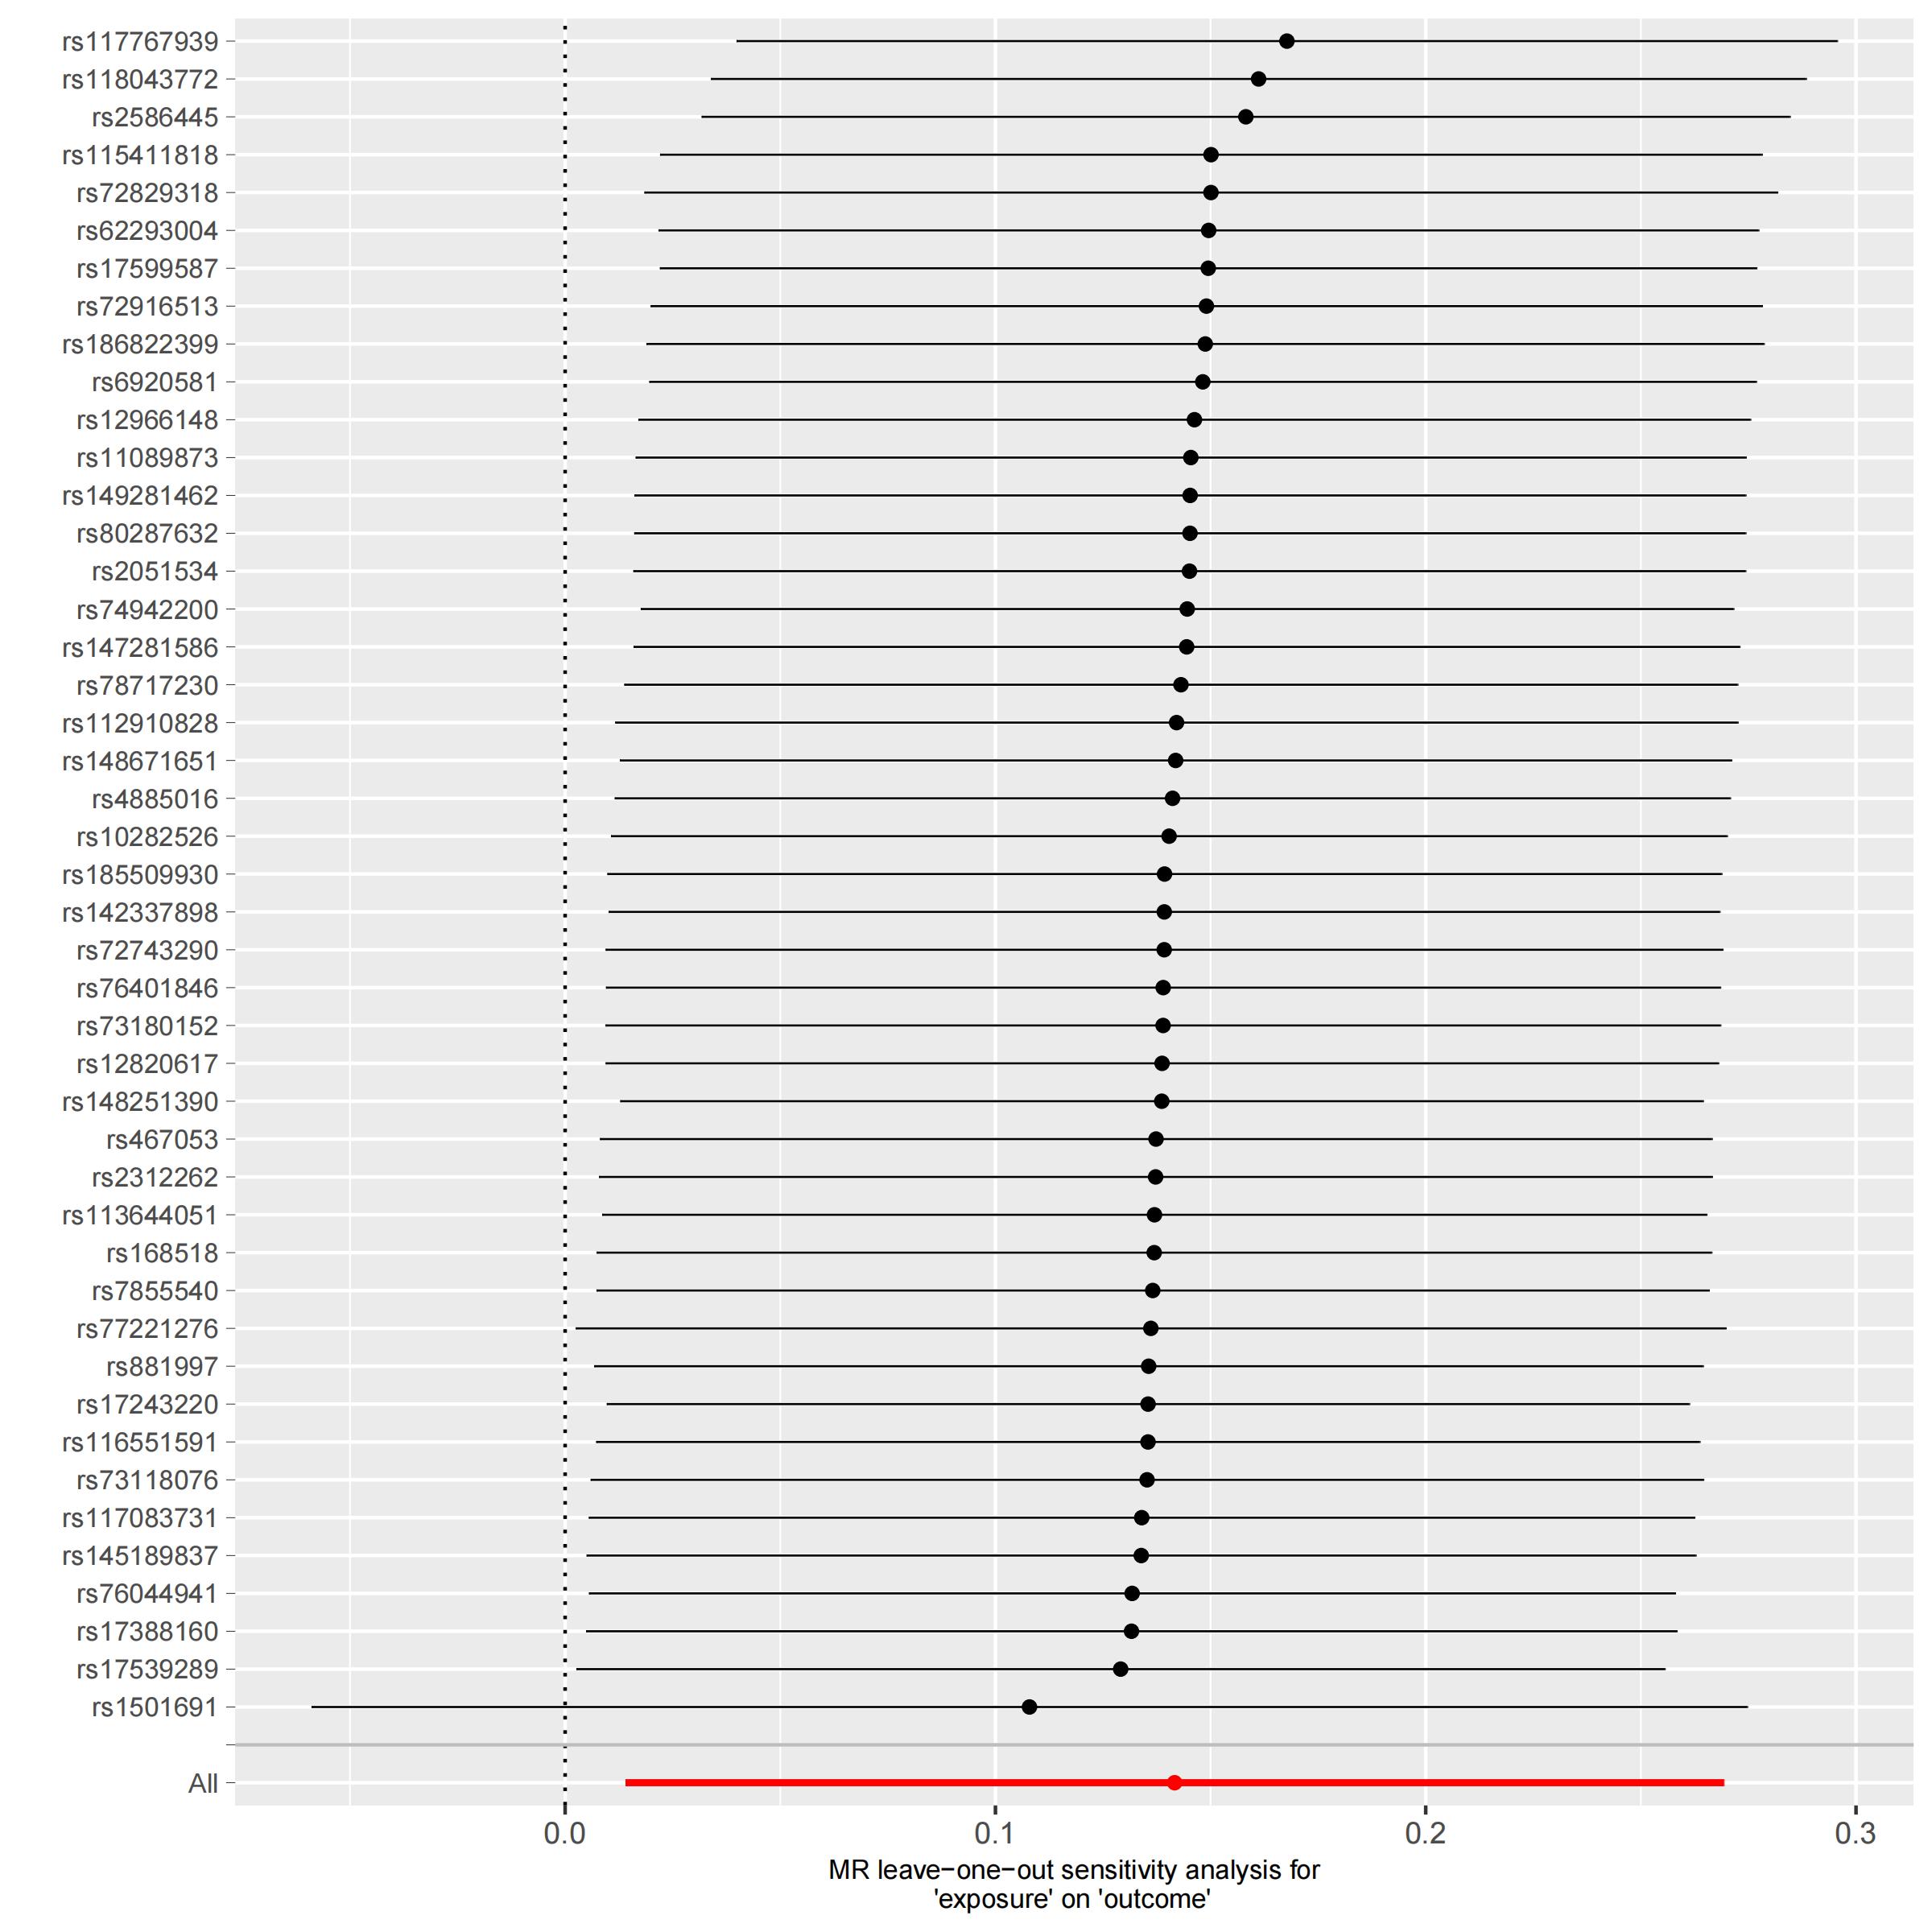

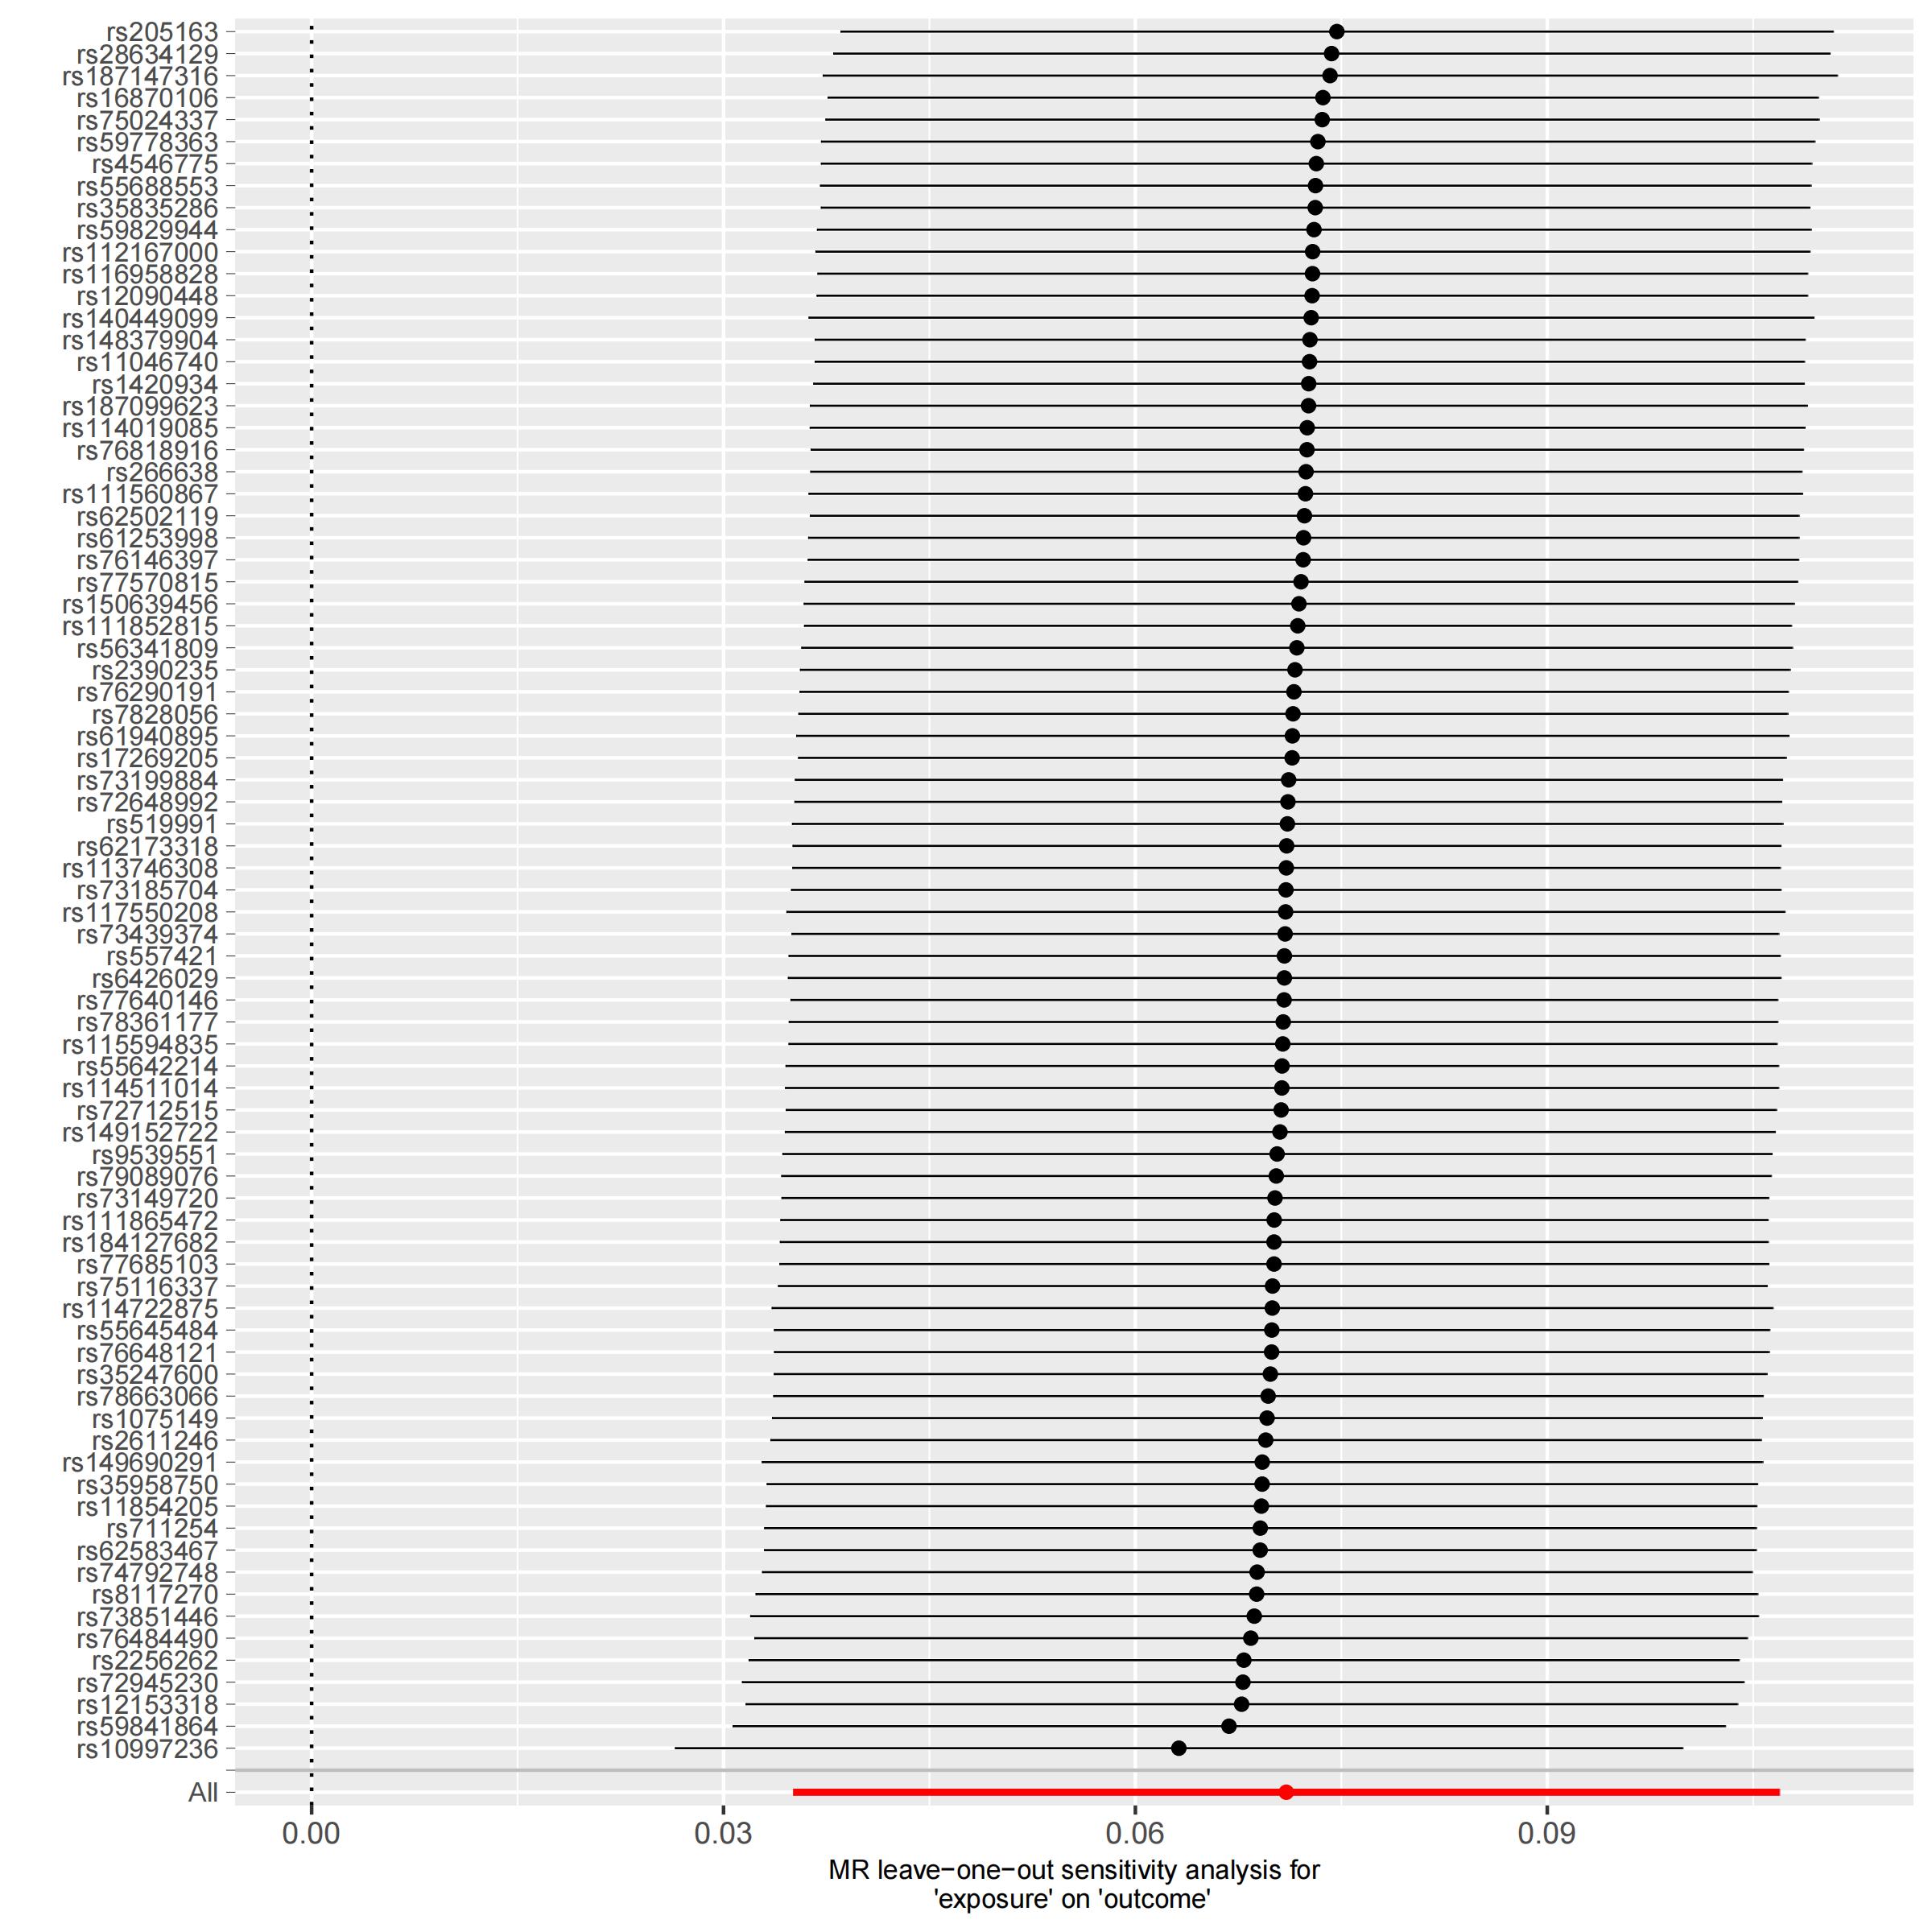


**I J**


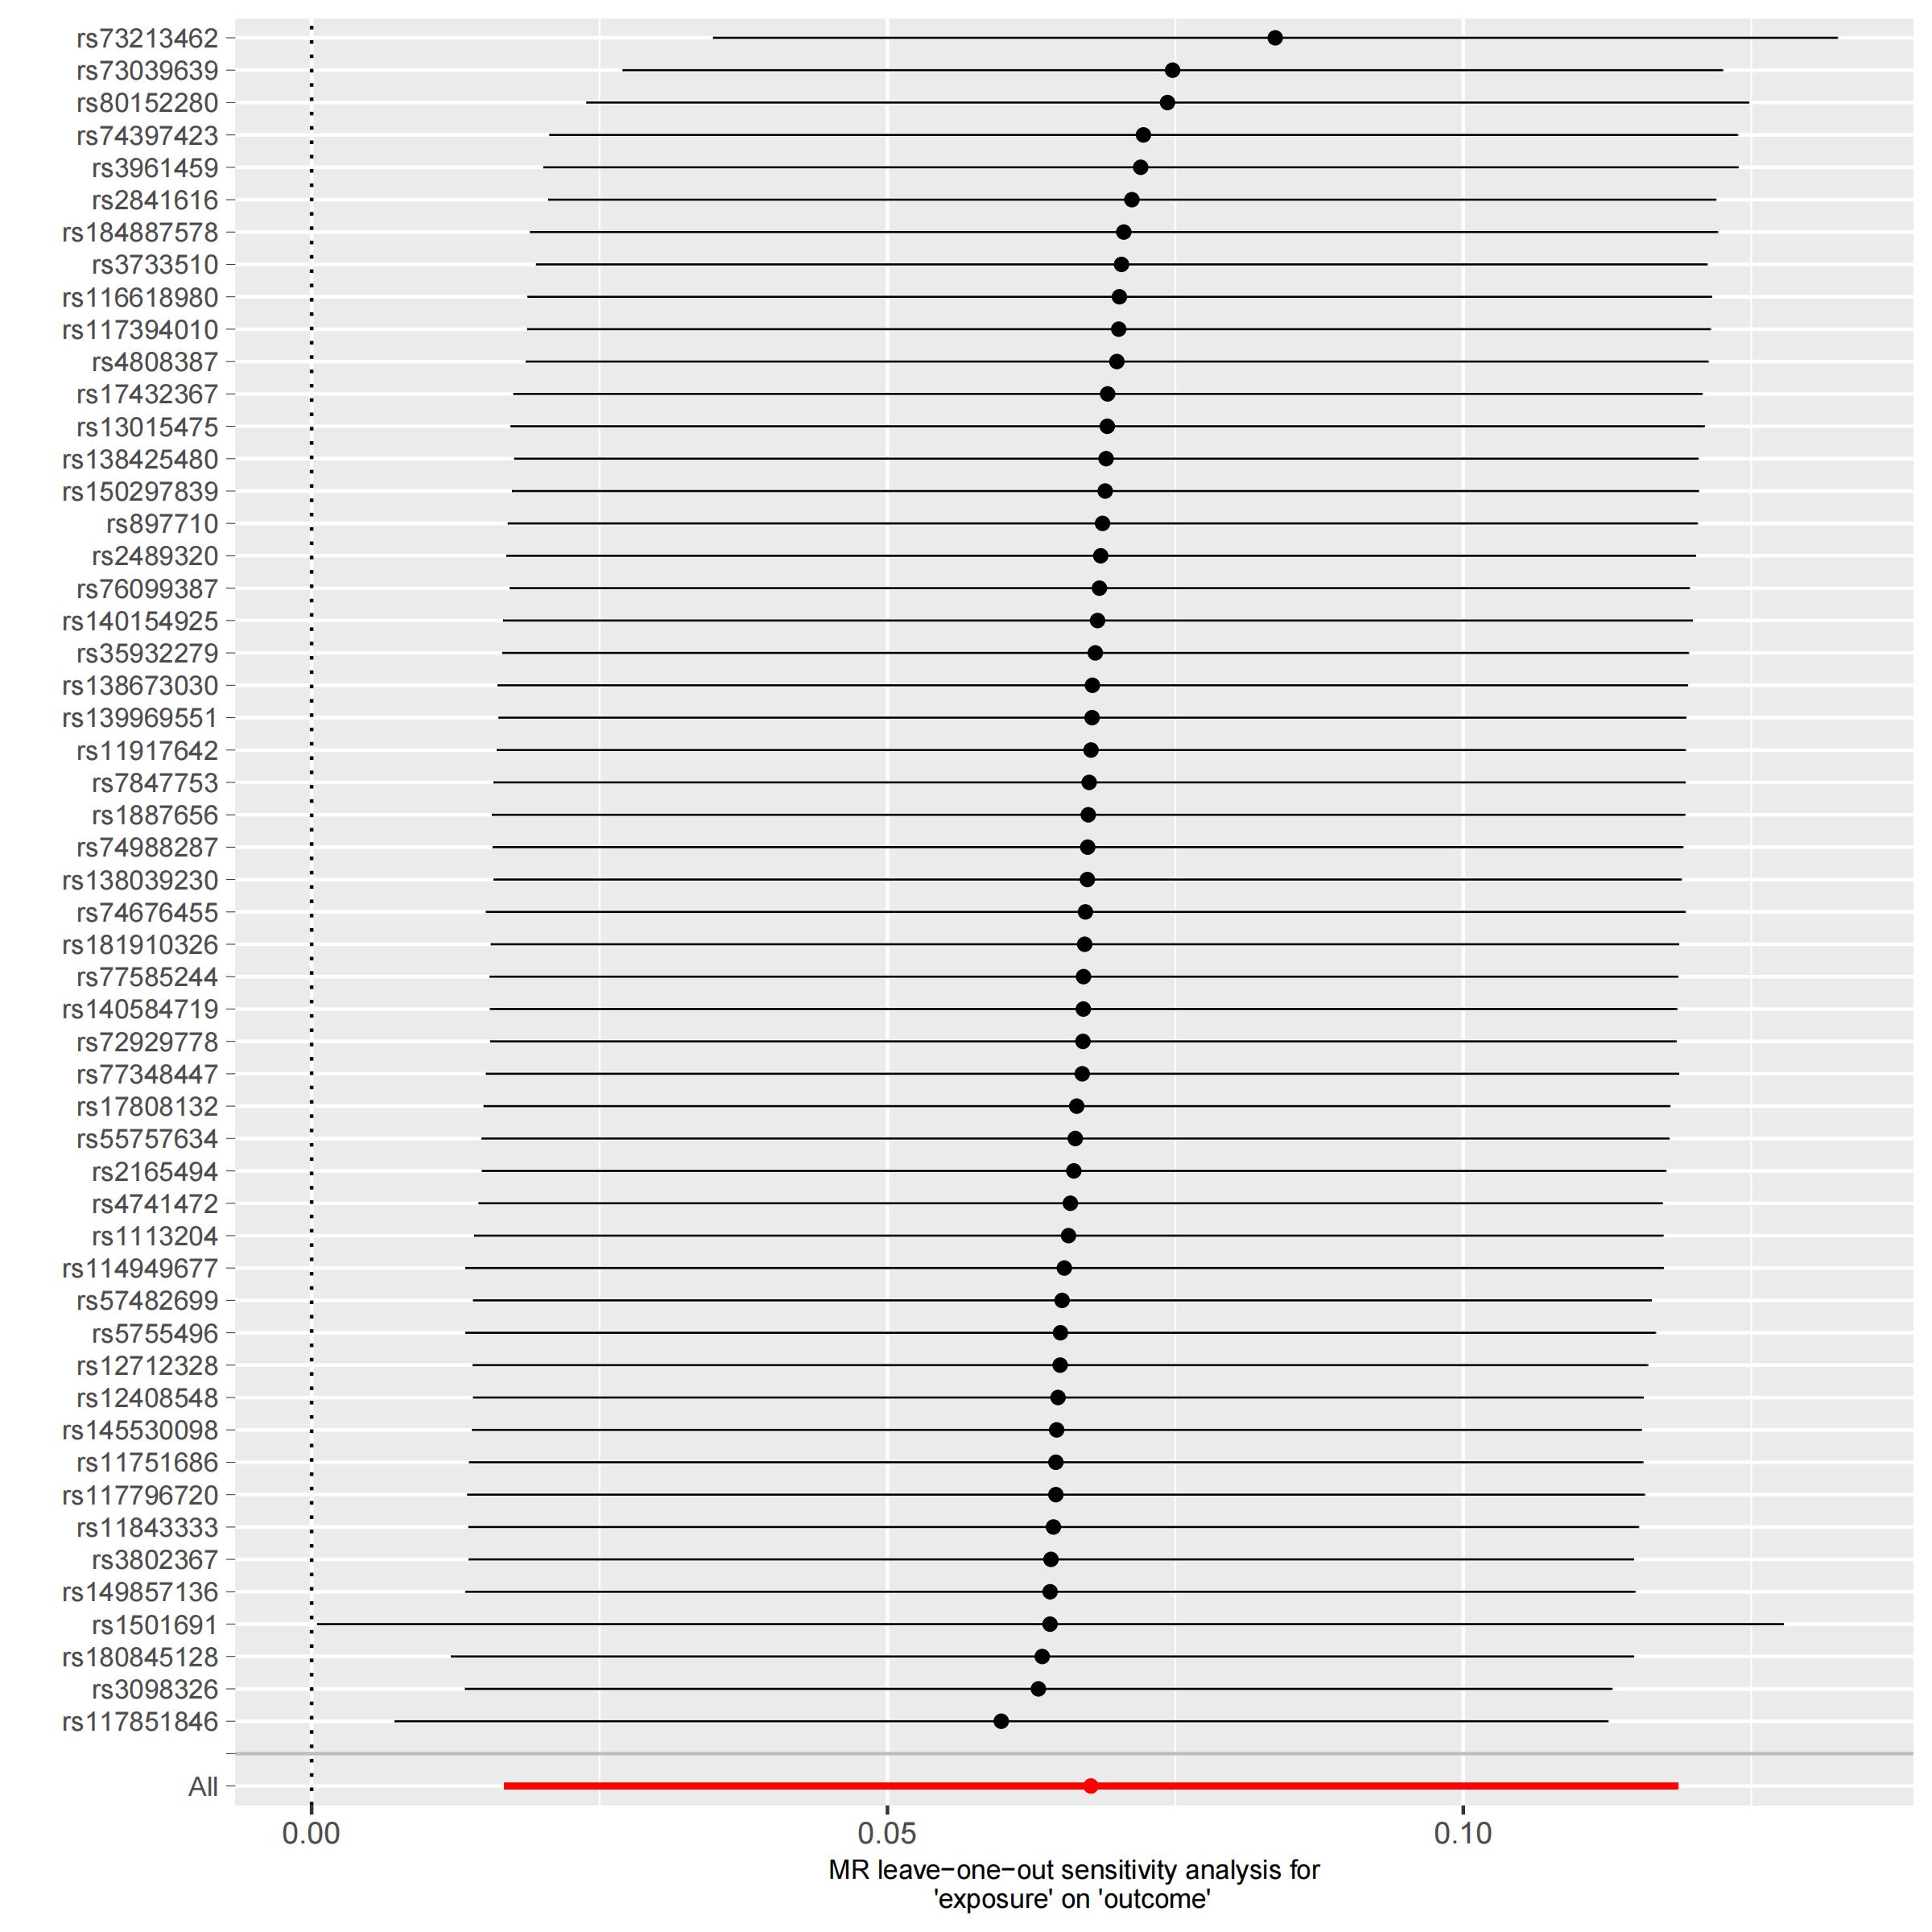

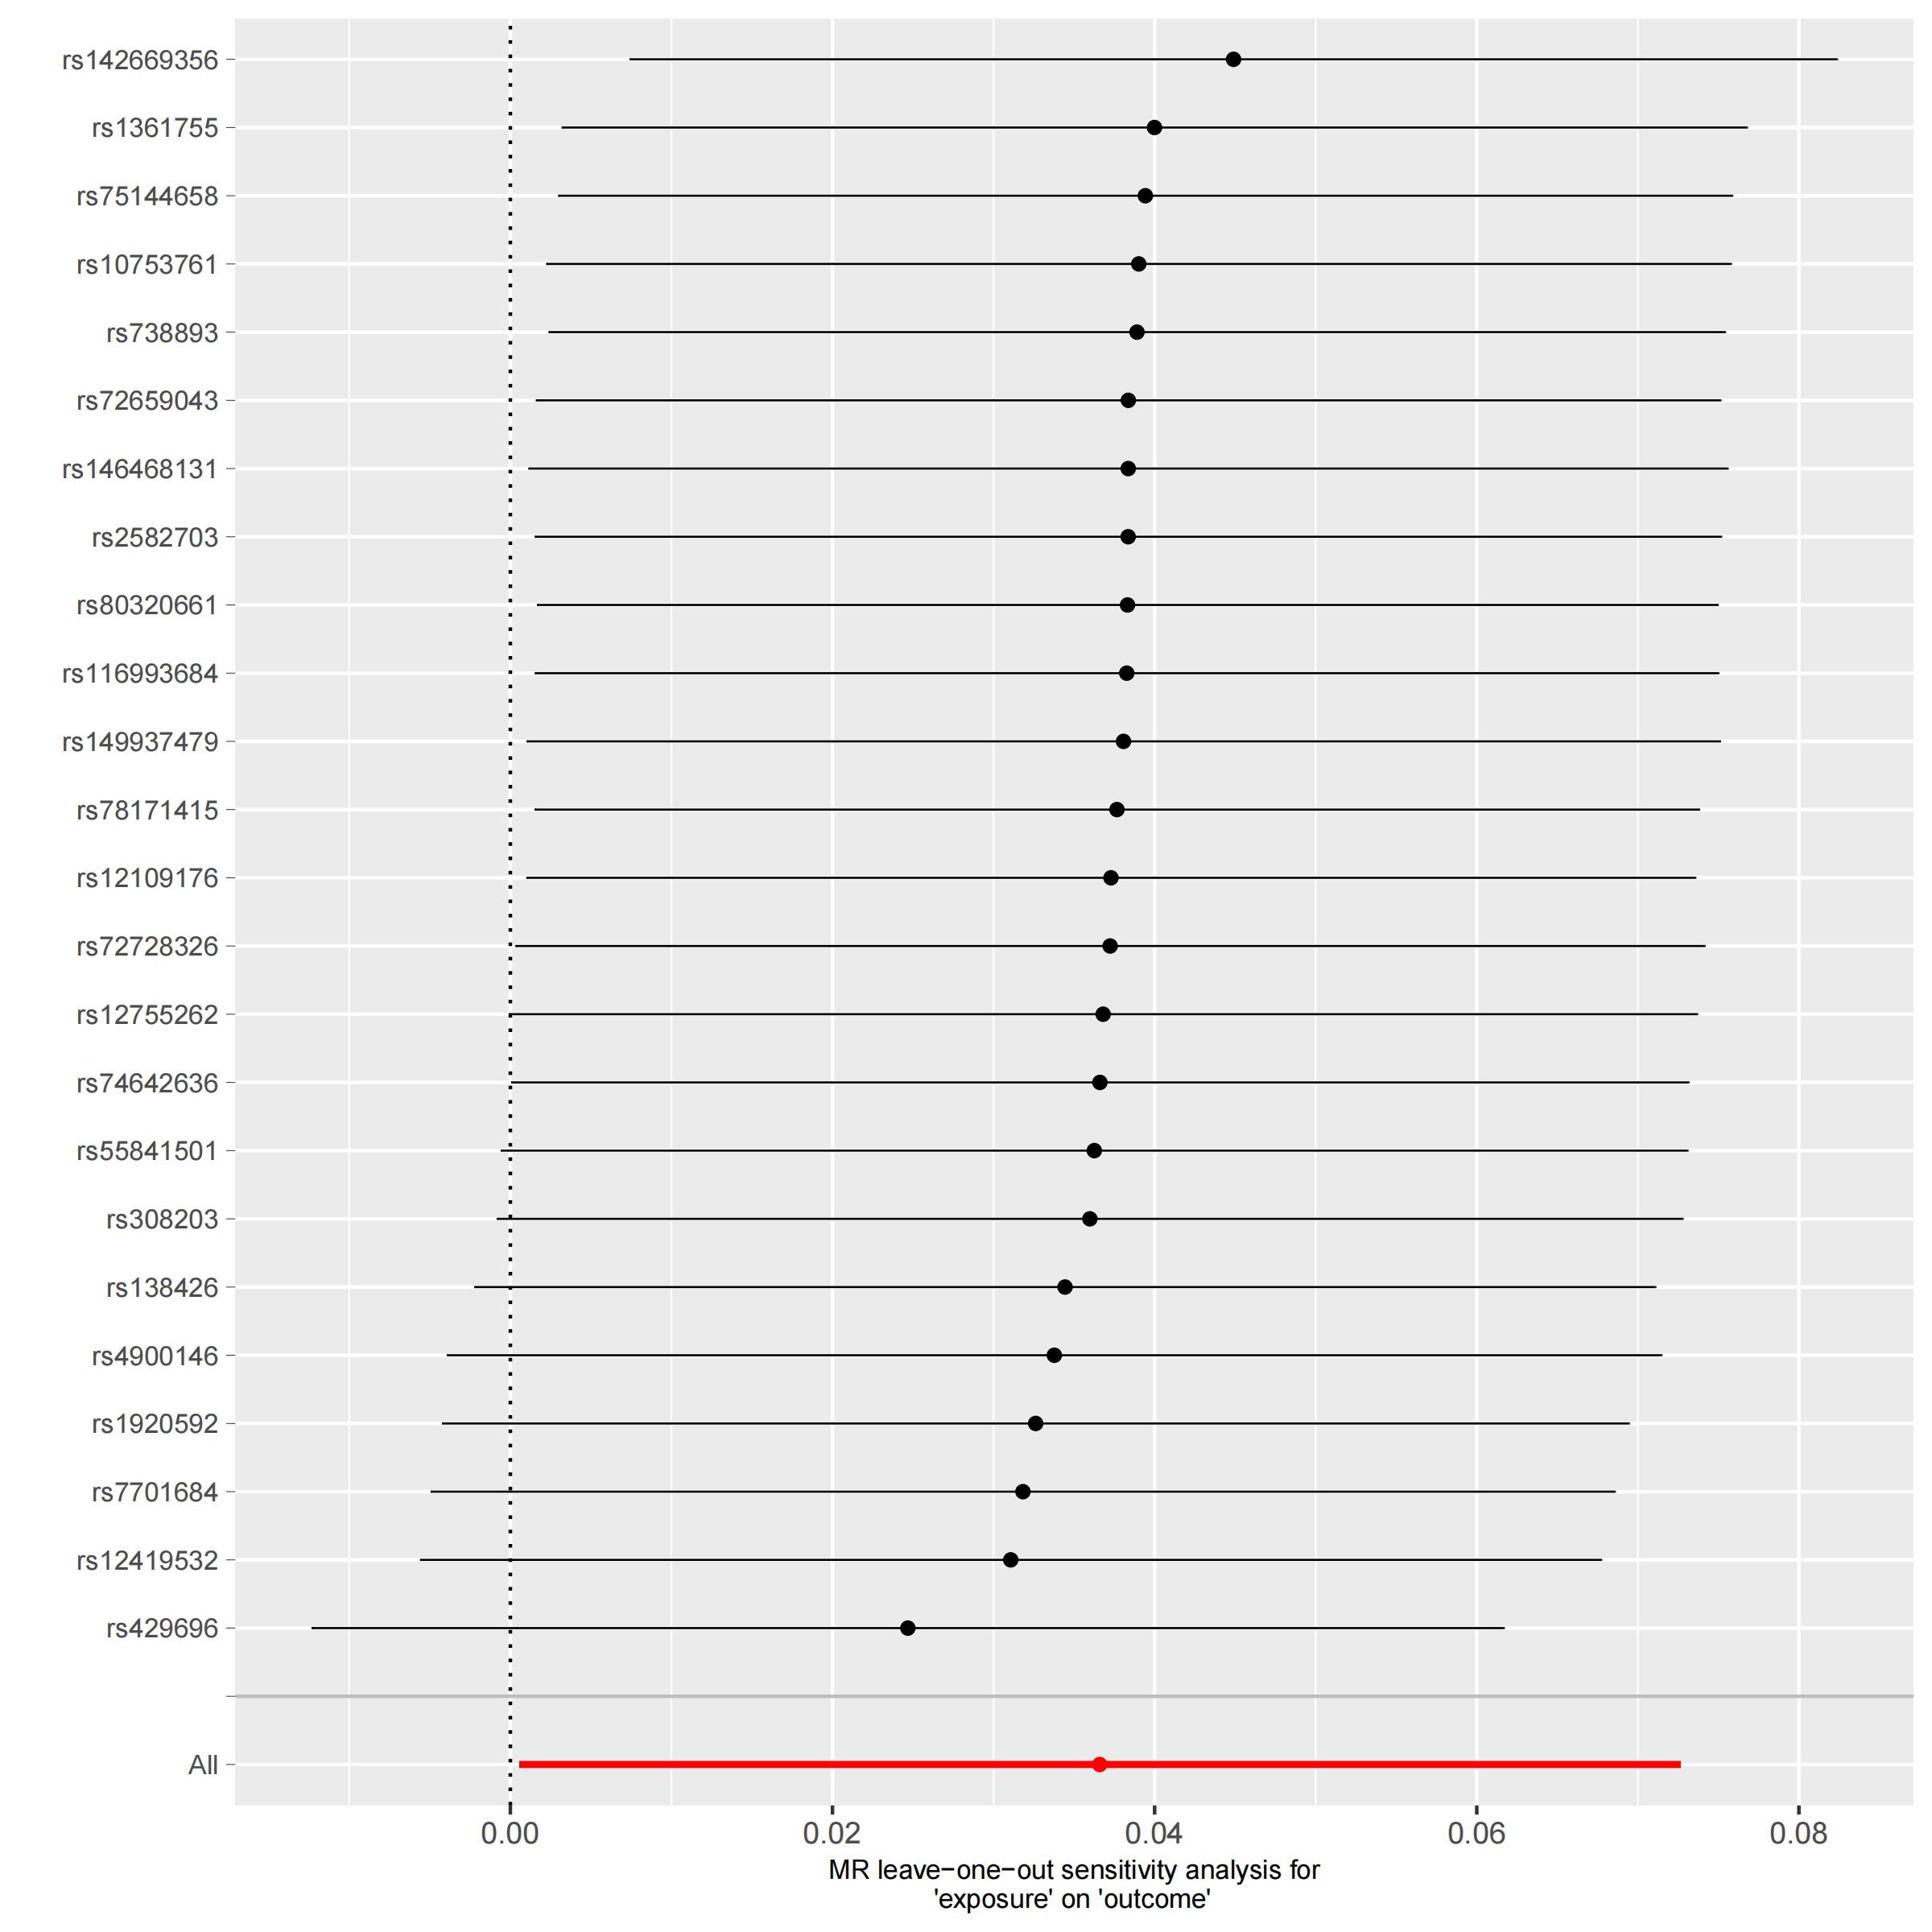


**Figure S7 MR Leave-One-Out Sensitivity Analysis for CSF Metabolites on PPD.**

In the order of the figures A to I, the names of Cerebrospinal Fluid Metabolites are guanosine, argininosuccinate, maleate, N6-methyllysine, homocarnosine, N-acetyl-isoputreanine, glucose, benzoate, gluconate, and arachidonate (20:4n6).

**A**


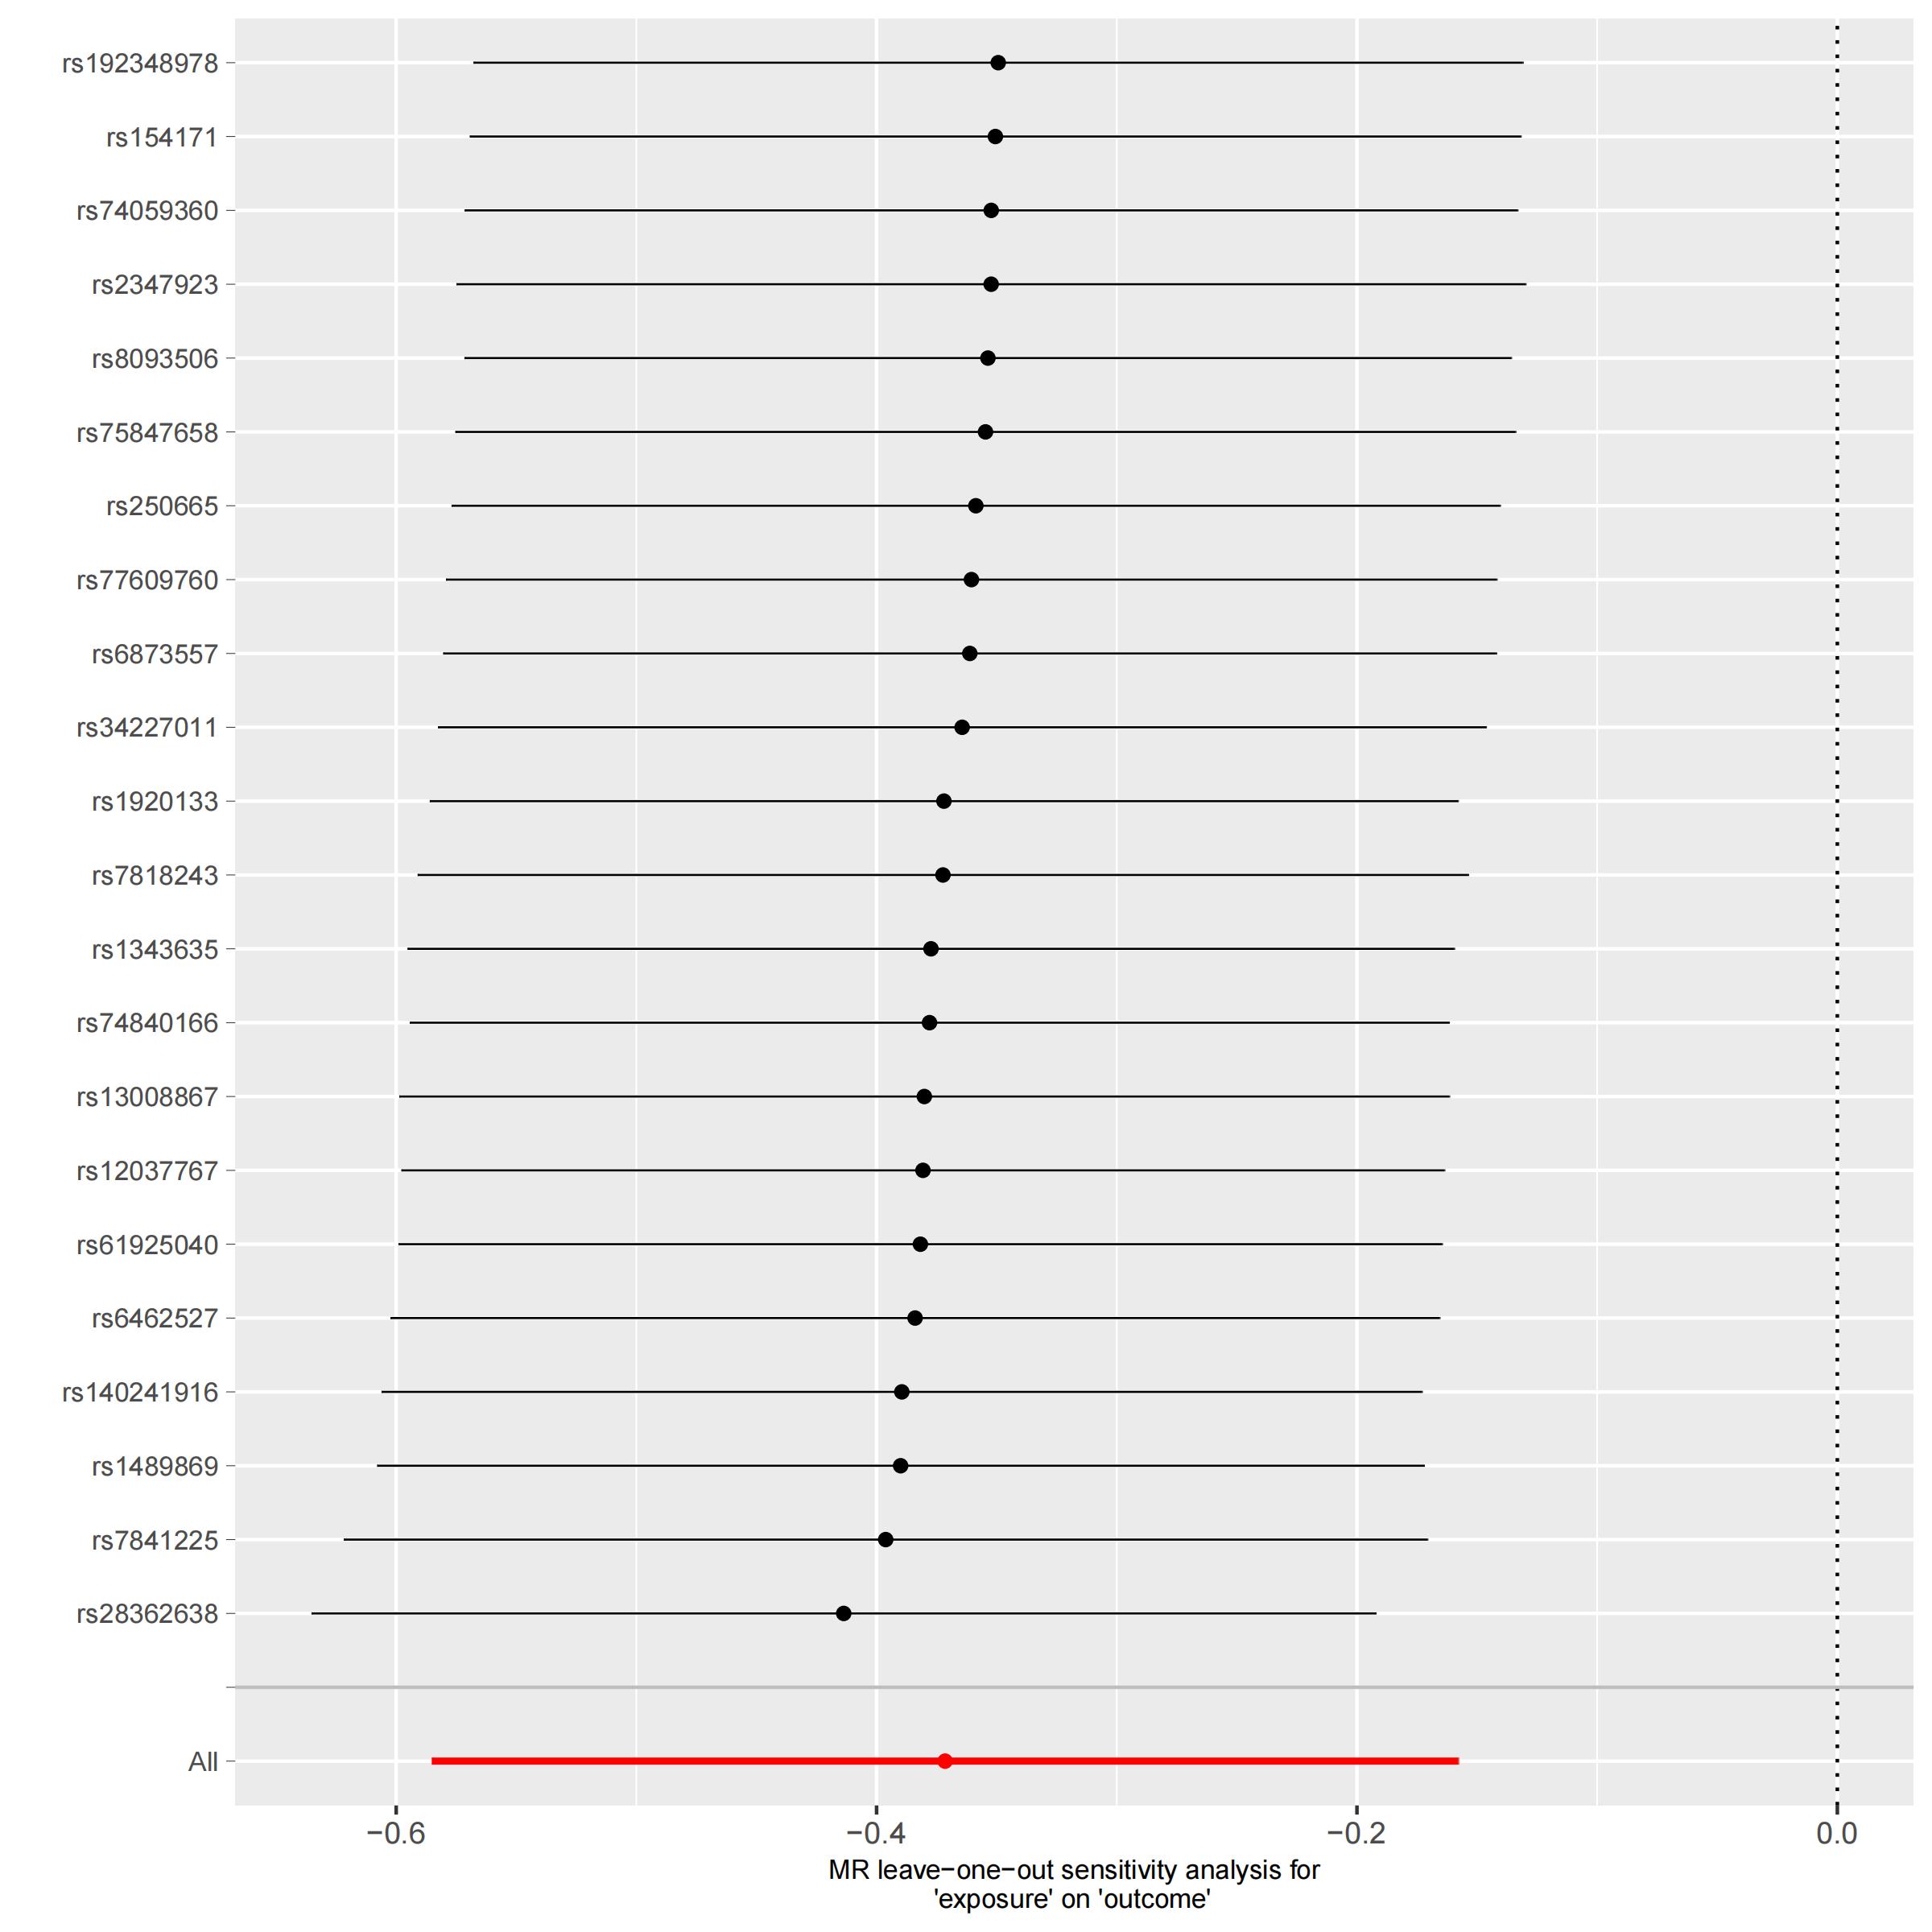


**Figure S8 MR Leave-One-Out Sensitivity Analysis for PPD on** **CSF Metabolites.**

In the order of the figures A to L, the names of CSF Metabolites are 4-chlorobenzoic acid, Uracil, Beta-citrylglutamate, 7-methylxanthine, Acetoacetate, 3-methoxytyrosine, N-acetyl-3-methylhistidine, Gluconate, Butyrate (4:0), S-methylcysteine, Uridine , Caffeine.
